# Supplementary material for: Peptides of the variable IgG domain as potential biomarker candidates in primary open-angle glaucoma (POAG)
Source: Oxford University Press journal article supplement (doi:10.1093/hmg/ddx332), 2017-09-19
Supplement: ddx332_supplementary_file_1.xlsx [file ddx332_supplementary_file_1.xlsx]

## Sheet: All peptides < 1 % FDR
Supplementary file 1: MaxQuant generated output matrix containing sequence, protein hit, mass, m/z, charge, score, length, missed cleavages, modifications, intensity and MS/MS fragmentation spectra information. Output data were filtered for contaminants and reversed hits.
FDR = false discovery rate
Sequence	Protein	Mass	m/z	Charges	Score	Length	Missed cleavages	Modifications	Intensity Control 1	Intensity Control 2	Intensity Control 3	Intensity Control 4	Intensity Control 5	Intensity Control 6	Intensity Control 7	Intensity Control 8	Intensity Control 9	Intensity Control 10	Intensity Control 11	Intensity Control 12	Intensity Control 13	Intensity Control 14	Intensity Control 15	Intensity POAG 1	Intensity POAG 2	Intensity POAG 3	Intensity POAG 4	Intensity POAG 5	Intensity POAG 6	Intensity POAG 7	Intensity POAG 8	Intensity POAG 9	Intensity POAG 10	Intensity POAG 11	Intensity POAG 12	Intensity POAG 13	Identification Control 1	Identification Control 2	Identification Control 3	Identification Control 4	Identification Control 5	Identification Control 6	Identification Control 7	Identification Control 8	Identification Control 9	Identification Control 10	Identification Control 11	Identification Control 12	Identification Control 13
AADSAVYYCAR	gi|66821531	1245.54	623.772	2	95.483	11	0	Unmodified	170180	118790	155880	0	238720	164390	125350	168290	199360	0	201370	129000	0	0	0	221300	0	0	0	0	0	0	0	0	0	0	0	0	By matching	By matching	By matching	By matching	By matching	By matching	By MS/MS	By matching	By MS/MS	By matching	By matching	By matching	By matching
AADTAVYYCTR	gi|8699353	1289.57	645.785	2	100.93	11	0	Unmodified	0	0	0	0	0	0	0	22049	0	0	0	0	0	0	0	0	0	0	0	25943	0	0	0	0	0	66974	0	618270	By matching	By matching	By matching	By matching	By matching	By matching	By matching	By matching	By matching	By matching	By matching	By matching	By matching
AAELTQPPSVSGAPGQR	gi|51490957	1664.85	833.424	2	83.751	17	0	Unmodified	0	0	0	0	0	0	0	0	0	0	0	0	0	0	0	0	0	0	0	0	0	47913	0	756390	0	0	0	186150	By matching	By matching	By matching	By matching	By matching	By matching	By matching	By matching	By matching	By matching	By matching	By matching	By matching
AAGIPDRFSGSGSGTDFTLTISR	gi|323433098	2312.14	771.713	3	71.042	23	1	Unmodified	1645300	0	0	0	1698200	0	0	0	1608600	0	0	0	0	1052400	693020	456300	930100	0	0	0	0	0	863680	324520	183170	601710	0	0	By MS/MS	By matching	By matching	By matching	By MS/MS	By matching	By matching	By matching	By MS/MS	By matching	By matching	By matching	By matching
AAISVDTSKNQFSLK	gi|558482704	1607.85	804.926	2	120.21	15	1	Unmodified	0	0	0	0	0	0	0	0	0	0	0	0	0	0	922570	0	0	0	0	0	0	0	0	0	0	0	0	0	By matching	By matching	By matching	By matching	By matching	By matching	By matching	By matching	By matching	By matching	By matching	By matching	By matching
AALTLSGAQPEDEADYYCLLSYSGAR	gi|219566601	2820.29	1411.15	2	69.771	26	0	Unmodified	0	0	0	0	0	0	0	0	0	0	0	0	0	0	0	0	0	0	0	0	0	0	0	0	0	1703700	0	0	By matching	By matching	By matching	By matching	By matching	By matching	By matching	By matching	By matching	By matching	By matching	By matching	By matching
AANCSPAKGMAGSEEREK	gi|768045573	1891.85	946.926	2	99.711	18	2	Oxidation (M)	608610	728190	854300	0	545650	610230	2510600	1461600	0	1567400	2540500	2672700	1726000	1309800	2932400	5452900	4315300	2645900	2367300	2032700	2767900	1731500	892650	2962400	2377000	3826300	2598200	3072800	By matching	By matching	By matching	By matching	By matching	By matching	By MS/MS	By MS/MS	By matching	By MS/MS	By MS/MS	By MS/MS	By matching
AAPSVTLFPPSSEELQANK	gi|16554039	1985.01	993.505	2	240.34	19	0	Unmodified	95678000	145020000	108100000	175670000	150890000	91079000	121700000	82578000	164600000	119490000	136890000	146430000	121990000	194680000	119230000	148610000	151580000	98554000	94813000	88534000	126910000	81614000	67921000	95409000	78182000	110580000	89902000	113930000	By MS/MS	By MS/MS	By MS/MS	By MS/MS	By MS/MS	By MS/MS	By MS/MS	By MS/MS	By MS/MS	By MS/MS	By MS/MS	By MS/MS	By MS/MS
AAPSVTLFPPSSEELQANR	gi|223815	2013.02	1007.51	2	100.04	19	0	Unmodified	1251600	587000	657240	1046500	2086000	0	676440	768400	776650	737250	489510	597200	1318600	610720	924340	1352800	932340	1301000	2296100	0	1579000	0	1226900	880600	324630	0	1599300	1160600	By MS/MS	By matching	By matching	By matching	By matching	By matching	By matching	By matching	By matching	By MS/MS	By matching	By MS/MS	By matching
AASSLQSGVPSR	gi|197115765	1158.6	580.3	2	129.76	12	0	Unmodified	270430	497010	563970	534500	728740	770010	358110	375730	454760	285060	872920	260860	363360	559360	239260	546040	730000	392050	367460	602570	428310	188690	89144	197920	105970	814890	275540	240370	By MS/MS	By MS/MS	By MS/MS	By MS/MS	By MS/MS	By MS/MS	By MS/MS	By MS/MS	By MS/MS	By MS/MS	By MS/MS	By matching	By MS/MS
ADDSAVYYCAR	gi|353253764	1289.53	645.767	2	93.096	11	0	Unmodified	0	0	0	0	0	0	0	0	0	0	0	0	0	183030	0	0	0	0	0	0	0	0	0	0	0	0	0	0	By matching	By matching	By matching	By matching	By matching	By matching	By matching	By matching	By matching	By matching	By matching	By matching	By matching
ADDTAFYYCAK	gi|16076349	1323.54	662.772	2	150.61	11	0	Unmodified	0	0	0	4594200	0	0	0	0	0	0	0	0	0	0	0	0	0	0	0	0	0	0	0	0	0	0	0	0	By matching	By matching	By matching	By MS/MS	By matching	By matching	By matching	By matching	By matching	By matching	By matching	By matching	By matching
ADDTALYYCAK	gi|33319160	1289.56	645.78	2	66.92	11	0	Unmodified	0	0	0	0	0	0	145380	89860	394110	0	0	292980	0	0	154100	0	0	0	197010	0	0	140860	0	0	0	0	0	163880	By matching	By matching	By matching	By matching	By matching	By matching	By matching	By matching	By MS/MS	By matching	By matching	By matching	By matching
ADDTALYYCAR	gi|611962148	1317.57	659.783	2	117.25	11	0	Unmodified	271460	191960	241840	209060	413390	159600	377210	0	355840	379420	0	400340	277920	347840	0	288450	337420	469430	200730	350250	268640	0	181880	625720	129060	667140	254590	344520	By matching	By matching	By matching	By matching	By matching	By matching	By matching	By matching	By matching	By matching	By matching	By matching	By matching
ADDTALYYCTR	gi|33318914	1347.58	674.788	2	131.12	11	0	Unmodified	0	0	0	0	226220	0	0	0	0	0	0	65923	0	0	0	282000	0	0	0	0	0	0	0	0	0	0	0	0	By matching	By matching	By matching	By matching	By matching	By matching	By matching	By matching	By matching	By matching	By matching	By matching	By matching
ADDTAVYFCAK	gi|194270632	1259.55	630.775	2	149.33	11	0	Unmodified	0	0	0	0	0	0	0	0	0	0	0	0	0	0	0	0	0	0	0	0	0	0	0	0	0	1434400	0	136650	By matching	By matching	By matching	By matching	By matching	By matching	By matching	By matching	By matching	By matching	By matching	By matching	By matching
ADDTAVYFCAR	gi|371446302	1287.56	644.778	2	150.04	11	0	Unmodified	0	0	368970	2078500	0	0	0	0	0	0	0	0	0	0	0	0	624530	0	0	0	0	0	0	0	0	0	0	0	By matching	By matching	By matching	By MS/MS	By matching	By matching	By matching	By matching	By matching	By matching	By matching	By matching	By matching
ADDTAVYFCSK	gi|587261	1275.54	638.772	2	75.566	11	0	Unmodified	0	0	0	0	0	0	0	0	0	0	0	0	0	0	0	0	0	0	0	0	0	0	0	0	215990	0	0	0	By matching	By matching	By matching	By matching	By matching	By matching	By matching	By matching	By matching	By matching	By matching	By matching	By matching
ADDTAVYYCAK	gi|247426253	1275.54	638.772	2	178.54	11	0	Unmodified	664450	480940	0	0	0	0	519520	652780	1292300	0	0	909940	0	1049900	1163200	480680	0	962700	627120	0	0	0	0	0	0	0	624470	842010	By MS/MS	By MS/MS	By matching	By matching	By matching	By matching	By MS/MS	By MS/MS	By MS/MS	By matching	By matching	By MS/MS	By matching
ADDTAVYYCAR	gi|34365282	1303.55	652.775	2	169.65	11	0	Unmodified	0	0	1507200	2156300	0	1710700	1306800	1617200	0	0	0	1174300	1406600	0	1485300	0	2519000	0	1111200	0	2323800	0	0	1502000	1666300	2313000	1124400	0	By matching	By matching	By MS/MS	By MS/MS	By matching	By MS/MS	By MS/MS	By MS/MS	By matching	By matching	By matching	By MS/MS	By MS/MS
ADDTSVYYCAR	gi|1498564	1319.55	660.773	2	113.93	11	0	Unmodified	0	0	0	0	2843700	0	0	0	0	0	0	0	0	0	0	0	2505300	0	0	0	0	0	0	3939200	0	0	0	0	By matching	By matching	By matching	By matching	By MS/MS	By matching	By matching	By matching	By matching	By matching	By matching	By matching	By matching
ADGGTTDYAAPVK	gi|6013036	1264.59	633.297	2	121.21	13	0	Unmodified	95725	218450	1411500	34848	220890	0	170290	168060	0	112060	263730	139620	348040	182580	177490	0	107600	184480	24494	90309	0	0	40088	0	0	145320	367380	111350	By matching	By MS/MS	By MS/MS	By matching	By MS/MS	By matching	By MS/MS	By matching	By matching	By matching	By MS/MS	By matching	By MS/MS
ADGSPVK	gi|166007177	672.344	337.172	2	120.62	7	0	Unmodified	0	0	0	0	0	212660	0	0	0	0	0	0	0	0	0	598510	0	0	302380	0	0	0	0	0	0	0	0	0	By matching	By matching	By matching	By matching	By matching	By matching	By matching	By matching	By matching	By matching	By matching	By matching	By matching
ADGSPVKAGVETTKPSK	gi|166007177	1670.88	836.442	2	125.96	17	2	Unmodified	0	503900	281850	680770	432470	0	0	0	560260	357270	0	0	920670	0	938040	0	182320	419490	0	552450	0	198900	744420	0	145100	0	294980	799560	By matching	By MS/MS	By matching	By matching	By matching	By matching	By matching	By matching	By matching	By matching	By matching	By matching	By MS/MS
ADGSPVKVGVETTKPSK	gi|170684348	1698.92	850.458	2	87.669	17	2	Unmodified	0	73752	0	0	117740	101270	66530	94995	63029	470670	55227	70829	0	300040	0	0	151900	0	0	116130	0	0	49099	0	0	0	250030	103820	By matching	By matching	By matching	By matching	By matching	By matching	By matching	By matching	By matching	By matching	By matching	By matching	By matching
ADIQVTQSPSFLSASVGDR	gi|58202720	1976.98	989.49	2	150.13	19	0	Unmodified	0	0	0	0	0	0	0	871810	0	0	0	1211400	1062000	0	1563300	1047400	1012300	288680	1256600	1930200	1312500	0	344290	1116200	420030	0	423640	1569600	By matching	By matching	By matching	By matching	By matching	By matching	By matching	By matching	By matching	By matching	By matching	By MS/MS	By MS/MS
ADIQVTQSPSSLSASVGDR	gi|58202702	1916.94	959.472	2	136.61	19	0	Unmodified	0	0	0	0	0	0	0	0	0	0	0	0	0	0	763450	519110	710260	602030	0	887690	0	0	0	0	0	0	1097700	765100	By matching	By matching	By matching	By matching	By matching	By matching	By matching	By matching	By matching	By matching	By matching	By matching	By matching
ADIVLTQTPGTLSLSPGER	gi|58202730	1954.04	978.019	2	175.56	19	0	Unmodified	0	0	1208600	449680	0	1284500	1918400	1987900	1841000	1595800	3713000	2765400	2372100	1775900	2364900	2812000	2821300	2485500	1878700	3151200	2321600	2112200	1112000	2665200	1069700	0	1768800	4092100	By matching	By matching	By MS/MS	By matching	By matching	By MS/MS	By MS/MS	By MS/MS	By matching	By MS/MS	By MS/MS	By MS/MS	By MS/MS
ADSSPVK	gi|16554039	702.355	352.177	2	120.49	7	0	Unmodified	553010	1147500	323490	0	700520	832790	315020	611690	0	0	1076800	0	1297400	1328200	0	1856400	0	0	322880	839940	1253400	0	244230	0	0	0	778840	0	By MS/MS	By MS/MS	By MS/MS	By matching	By matching	By MS/MS	By MS/MS	By matching	By matching	By matching	By MS/MS	By matching	By MS/MS
ADSSPVKAGVETTTPSK	gi|16554039	1673.85	837.924	2	200.71	17	1	Unmodified	4493700	13093000	12849000	13155000	15275000	28192000	12946000	6459400	6634400	7201400	29954000	11788000	11216000	12299000	9960200	13984000	9137800	4875200	6222000	11366000	13557000	3954900	3581700	576210	1776600	7476500	6809000	11804000	By MS/MS	By MS/MS	By MS/MS	By MS/MS	By MS/MS	By MS/MS	By MS/MS	By MS/MS	By MS/MS	By MS/MS	By MS/MS	By MS/MS	By MS/MS
ADSSPVKAGVETTTPSKQSNNK	gi|16554039	2245.12	1123.56	2	85.969	22	2	Unmodified	875660	43139	29668	0	0	299040	0	0	0	0	337020	0	0	0	0	1694400	0	0	0	0	263380	0	0	0	0	212170	0	36737	By MS/MS	By matching	By matching	By matching	By matching	By MS/MS	By matching	By matching	By matching	By matching	By MS/MS	By matching	By matching
ADSSPVTAGVETTTPSK	gi|33722	1646.8	824.4	2	102.36	17	0	Unmodified	1547800	0	0	0	0	0	0	0	0	0	0	0	0	0	0	0	0	0	0	0	0	401000	0	0	0	0	619520	0	By matching	By matching	By matching	By matching	By matching	By matching	By matching	By matching	By matching	By matching	By matching	By matching	By matching
ADSTYYADSVR	gi|112700351	1246.55	624.273	2	121.68	11	0	Unmodified	0	0	0	762470	0	0	0	0	53407	0	0	0	0	0	0	0	0	109940	0	0	0	0	0	0	0	0	0	0	By matching	By matching	By matching	By MS/MS	By matching	By matching	By matching	By matching	By matching	By matching	By matching	By matching	By matching
ADTLTDEINFLR	gi|119617032	1406.7	704.352	2	100.02	12	0	Unmodified	300410	0	0	0	250610	271510	0	72027	229620	0	0	0	0	0	0	0	0	0	218940	0	0	0	0	105830	0	0	99937	0	By MS/MS	By matching	By matching	By matching	By matching	By matching	By matching	By matching	By matching	By matching	By matching	By matching	By matching
ADYEKHKVYACEVTHQGLSSPVTK	gi|817599137	2746.34	916.446	3	122.19	24	2	Unmodified	877710	0	159820	0	0	200600	265180	312590	0	0	0	165760	0	0	0	2001500	718780	246990	0	0	620890	542820	259860	1728100	1798200	1489200	259020	184830	By matching	By matching	By matching	By matching	By matching	By matching	By matching	By matching	By matching	By matching	By matching	By matching	By matching
AEDSALYYCAK	gi|106897229	1289.56	645.78	2	72.848	11	0	Unmodified	138370	237910	159940	219070	196690	139490	0	0	0	0	0	0	0	499930	0	167020	340260	319420	0	0	241760	0	0	191860	0	380430	387430	0	By matching	By matching	By matching	By MS/MS	By MS/MS	By matching	By matching	By matching	By matching	By matching	By matching	By matching	By matching
AEDSALYYCAR	gi|3851240	1317.57	659.783	2	90.05	11	0	Unmodified	0	0	0	0	0	0	0	0	0	0	0	0	0	0	0	0	0	0	0	0	0	0	0	152000	51053	667140	0	0	By matching	By matching	By matching	By matching	By matching	By matching	By matching	By matching	By matching	By matching	By matching	By matching	By matching
AEDSAVYFCAR	gi|114147425	1287.56	644.778	2	96.756	11	0	Unmodified	0	87723	57143	340410	74592	86459	46232	0	0	0	0	0	0	0	0	168970	0	507270	130630	0	0	47268	0	0	0	0	0	0	By matching	By matching	By matching	By matching	By matching	By matching	By matching	By matching	By matching	By matching	By matching	By matching	By matching
AEDSAVYYCAR	gi|371447815	1303.55	652.775	2	119.27	11	0	Unmodified	0	0	0	0	0	0	0	0	0	0	0	1174300	0	0	0	0	0	0	0	0	0	0	0	0	0	0	0	0	By matching	By matching	By matching	By matching	By MS/MS	By MS/MS	By matching	By matching	By MS/MS	By matching	By matching	By MS/MS	By matching
AEDSGVYYCAR	gi|519672524	1289.53	645.767	2	137.46	11	0	Unmodified	0	0	0	0	0	0	0	0	0	0	0	0	0	183030	0	0	0	0	304400	0	0	0	0	233470	0	0	0	0	By matching	By matching	By matching	By matching	By matching	By matching	By matching	By matching	By matching	By matching	By matching	By matching	By matching
AEDTADYYCAR	gi|611962348	1333.52	667.762	2	93.345	11	0	Unmodified	0	0	0	0	0	0	0	0	0	0	0	0	0	0	0	139870	0	0	0	0	0	0	0	0	0	0	0	0	By matching	By matching	By matching	By matching	By matching	By matching	By matching	By matching	By matching	By matching	By matching	By matching	By matching
AEDTAFYYCAK	gi|519673050	1337.56	669.78	2	118.28	11	0	Unmodified	0	142540	0	153260	256260	89645	234930	121060	149580	87780	158660	156260	211600	234410	0	95265	164470	112320	174130	0	175860	151570	75581	667780	80153	285210	111690	87178	By matching	By matching	By matching	By matching	By matching	By matching	By MS/MS	By matching	By matching	By matching	By matching	By matching	By matching
AEDTAFYYCAR	gi|62871032	1365.57	683.783	2	80.014	11	0	Unmodified	206900	134080	0	299060	193430	203720	119280	191320	460700	137480	188470	87050	91247	223050	313520	151210	368760	262840	0	84426	249800	159760	0	151750	0	129830	0	305600	By matching	By matching	By matching	By matching	By matching	By matching	By matching	By matching	By matching	By matching	By matching	By matching	By matching
AEDTALYFCAK	gi|371445416	1287.58	644.79	2	123.62	11	0	Unmodified	0	302150	244300	198340	132300	0	125850	206750	513300	246520	320240	0	124340	384180	277720	285650	331490	455760	191640	0	0	122000	225040	212360	68060	0	526830	165850	By matching	By MS/MS	By matching	By matching	By matching	By matching	By matching	By matching	By matching	By matching	By matching	By matching	By matching
AEDTALYYCAK	gi|34364651	1303.58	652.788	2	215.56	11	0	Unmodified	880670	2638800	1492800	462720	3723400	2248400	2602100	1877600	3544700	1532300	2501700	2379800	4367000	3554400	2275100	2093500	2689800	2788400	1633400	989130	1810100	2066400	1501100	1879900	1079600	2985400	2261000	1457900	By MS/MS	By MS/MS	By MS/MS	By matching	By MS/MS	By MS/MS	By MS/MS	By MS/MS	By MS/MS	By MS/MS	By MS/MS	By MS/MS	By MS/MS
AEDTALYYCAR	gi|2921514	1331.58	666.791	2	211.64	11	0	Unmodified	2075700	1722500	1630500	1550500	2666000	1652800	2130500	2149300	3844800	610780	1646400	1911500	2620200	3923800	1531000	1770200	1763900	2375100	1674700	1360500	1679800	1937700	1151800	2936500	961940	2315800	1905500	2171900	By MS/MS	By MS/MS	By MS/MS	By MS/MS	By MS/MS	By MS/MS	By MS/MS	By MS/MS	By MS/MS	By MS/MS	By MS/MS	By MS/MS	By MS/MS
AEDTALYYCVK	gi|33318992	1331.61	666.803	2	155	11	0	Unmodified	167480	281250	0	415390	489780	168490	167640	162090	0	182440	4640800	157830	323900	280200	249330	161650	0	192170	0	0	242860	173940	0	220830	86726	181830	0	96888	By MS/MS	By MS/MS	By matching	By MS/MS	By MS/MS	By matching	By matching	By matching	By matching	By matching	By MS/MS	By matching	By MS/MS
AEDTALYYCVR	gi|304562407	1359.61	680.806	2	93.561	11	0	Unmodified	178930	80606	0	0	0	91466	0	147830	157470	140690	0	89713	0	161110	160180	187600	0	0	0	0	150300	173670	0	0	109410	0	0	0	By matching	By matching	By matching	By matching	By matching	By matching	By matching	By MS/MS	By MS/MS	By matching	By matching	By matching	By matching
AEDTATYYCAK	gi|58221905	1291.54	646.77	2	98.754	11	0	Unmodified	0	0	0	0	139000	0	0	52966	0	0	0	0	82771	0	0	0	0	40390	0	0	0	0	0	59242	0	0	0	29286	By matching	By matching	By matching	By matching	By MS/MS	By matching	By matching	By matching	By matching	By matching	By matching	By matching	By MS/MS
AEDTATYYCVK	gi|27753279	1319.57	660.785	2	175.49	11	0	Unmodified	0	0	0	0	0	0	0	0	0	0	0	0	0	0	0	0	0	670830	0	0	0	0	0	0	0	0	0	0	By matching	By matching	By matching	By matching	By matching	By matching	By matching	By matching	By matching	By matching	By matching	By matching	By matching
AEDTAVYFCAK	gi|21756643	1273.56	637.782	2	162.38	11	0	Unmodified	0	570000	530800	319470	530890	388690	0	182620	623000	254580	372470	449450	378660	493050	424980	211870	444770	813450	228610	550650	0	144880	0	432630	159700	216450	412440	427910	By matching	By MS/MS	By MS/MS	By matching	By MS/MS	By matching	By matching	By matching	By matching	By matching	By matching	By matching	By MS/MS
AEDTAVYFCAR	gi|404551428	1301.57	651.785	2	173.64	11	0	Unmodified	880160	1259300	619850	933960	1482000	884910	798660	821880	1707600	829200	786070	684510	936110	1314000	912640	1269400	855890	1576000	785530	698560	814650	452480	477780	1060600	734340	822660	932010	1192300	By MS/MS	By MS/MS	By matching	By MS/MS	By MS/MS	By MS/MS	By matching	By MS/MS	By MS/MS	By MS/MS	By MS/MS	By matching	By MS/MS
AEDTAVYYCAR	gi|209402818	1317.57	659.783	2	169.58	11	0	Unmodified	6499600	9416900	6347200	8535500	13987000	6696400	8309700	12960000	8859900	8340000	9372900	5907700	12311000	12771000	6768200	6715700	9821800	9664300	6925700	10756000	10826000	6745100	3547500	7335100	3893100	16024000	4023200	9347900	By MS/MS	By MS/MS	By MS/MS	By MS/MS	By MS/MS	By MS/MS	By MS/MS	By MS/MS	By MS/MS	By MS/MS	By MS/MS	By MS/MS	By MS/MS
AEDTAVYYCASK	gi|304563214	1376.59	689.296	2	78.287	12	0	Unmodified	0	0	0	0	0	0	0	0	0	0	0	0	0	0	58784	0	0	0	0	0	0	0	0	0	0	180490	0	0	By matching	By matching	By matching	By matching	By matching	By matching	By matching	By matching	By matching	By matching	By matching	By matching	By matching
AEDTAVYYCASR	gi|21670587	1404.6	703.299	2	163.51	12	0	Unmodified	0	0	0	0	0	0	0	0	0	0	0	0	0	0	0	0	0	0	0	972510	0	0	0	0	0	0	0	0	By matching	By matching	By matching	By matching	By matching	By matching	By matching	By matching	By matching	By matching	By matching	By matching	By matching
AEDTAVYYCGR	gi|371445909	1303.55	652.775	2	120.06	11	0	Unmodified	0	244490	0	0	0	0	0	0	0	307620	0	0	730330	0	0	0	0	0	0	0	0	0	0	0	0	183880	0	0	By matching	By MS/MS	By matching	By matching	By matching	By matching	By matching	By matching	By matching	By MS/MS	By matching	By matching	By MS/MS
AEDTAVYYCLR	gi|910276846	1359.61	680.806	2	124.42	11	0	Unmodified	0	0	0	533300	0	0	0	0	0	0	0	0	0	0	0	0	0	0	0	0	0	0	0	0	0	0	0	0	By matching	By matching	By matching	By MS/MS	By matching	By matching	By matching	By matching	By matching	By matching	By matching	By matching	By matching
AEDTAVYYCSR	gi|442922	1333.56	667.78	2	71.085	11	0	Unmodified	0	48485	0	148790	0	0	53241	0	0	131550	93579	72515	0	0	0	0	0	0	0	0	99701	47612	0	152160	154800	234200	141010	0	By matching	By matching	By matching	By matching	By matching	By matching	By matching	By matching	By matching	By matching	By matching	By matching	By matching
AEDTAVYYCTR	gi|33319652	1347.58	674.788	2	160.67	11	0	Unmodified	256490	718250	404400	386830	799270	334190	388710	357810	293530	234510	417000	248670	498930	0	390660	216870	387970	266940	0	280390	379410	233290	157830	369570	284020	1898500	0	839520	By MS/MS	By MS/MS	By MS/MS	By MS/MS	By MS/MS	By MS/MS	By MS/MS	By MS/MS	By MS/MS	By MS/MS	By matching	By matching	By matching
AEDTAVYYCVK	gi|392311589	1317.59	659.796	2	149.96	11	0	Unmodified	0	553710	281380	0	168930	594040	186240	267330	450780	214190	209770	208390	699930	0	424910	0	456770	0	286030	1882000	245280	505720	199580	0	0	0	0	0	By matching	By MS/MS	By matching	By matching	By matching	By MS/MS	By matching	By matching	By MS/MS	By matching	By matching	By matching	By matching
AEDTAVYYCVR	gi|74147383	1345.6	673.799	2	175.15	11	0	Unmodified	1033800	1565300	1871700	787780	1822400	587700	832800	699580	1169100	0	787170	0	1051700	2076900	1040000	1291200	1238800	756250	0	1114100	756440	732080	424320	0	1371100	936280	701660	879130	By matching	By MS/MS	By MS/MS	By matching	By MS/MS	By matching	By matching	By matching	By matching	By matching	By matching	By matching	By MS/MS
AEDTDVYYCAR	gi|5917704	1361.56	681.778	2	68.355	11	0	Unmodified	195140	0	0	0	0	0	0	0	0	0	0	0	0	0	0	0	0	0	0	0	0	0	0	0	0	0	0	0	By MS/MS	By matching	By matching	By matching	By matching	By matching	By matching	By matching	By matching	By matching	By matching	By matching	By matching
AEDTGLYYCAK	gi|612406577	1289.56	645.78	2	119.27	11	0	Unmodified	0	3952400	0	0	0	0	3017400	0	3924300	0	0	0	0	0	0	0	0	0	0	0	0	0	1919500	0	0	0	0	0	By matching	By MS/MS	By matching	By matching	By matching	By matching	By MS/MS	By matching	By MS/MS	By matching	By matching	By matching	By matching
AEDTGLYYCAR	gi|118405815	1317.57	659.783	2	114.86	11	0	Unmodified	0	0	45115	90631	0	0	0	272780	0	104310	0	0	0	0	0	0	0	255570	129140	0	89195	0	85205	0	0	47608	0	0	By MS/MS	By matching	By matching	By matching	By matching	By matching	By matching	By MS/MS	By matching	By matching	By matching	By matching	By matching
AEDTGVYYCAR	gi|371446264	1303.55	652.775	2	143.24	11	0	Unmodified	0	244490	0	0	0	0	0	0	0	0	0	0	730330	0	343930	0	0	0	300160	1511700	0	0	0	0	0	0	0	0	By matching	By MS/MS	By matching	By MS/MS	By MS/MS	By MS/MS	By matching	By matching	By matching	By matching	By matching	By matching	By MS/MS
AEDTGVYYCATR	gi|567139	1404.6	703.299	2	142.08	12	0	Unmodified	0	0	0	1287600	0	0	0	0	127140	0	82139	0	0	0	0	0	0	0	0	0	0	0	0	202600	0	0	0	69459	By matching	By matching	By matching	By MS/MS	By matching	By matching	By matching	By matching	By matching	By matching	By matching	By matching	By matching
AEDTSVYYCTR	gi|145942071	1363.57	682.786	2	115	11	0	Unmodified	0	108180	82185	439590	187820	167650	260570	121820	137370	66217	97845	161360	145910	0	0	115960	143110	83510	292790	0	177900	96678	57916	101460	0	0	0	0	By matching	By matching	By matching	By MS/MS	By matching	By matching	By matching	By matching	By matching	By matching	By matching	By matching	By matching
AEDTVVYYCAR	gi|3832568	1345.6	673.799	2	119.22	11	0	Unmodified	0	0	0	0	0	0	0	0	8294300	0	0	0	0	0	0	0	0	0	0	0	0	0	0	3610200	1799500	0	0	0	By matching	By matching	By matching	By matching	By matching	By matching	By matching	By matching	By MS/MS	By matching	By matching	By matching	By matching
AEETAVYYCAK	gi|519673392	1303.58	652.788	2	123.62	11	0	Unmodified	0	0	0	0	0	223510	0	0	363700	184280	0	271630	0	351620	213480	154510	230950	0	0	0	190380	156250	0	290100	0	0	186090	240390	By matching	By matching	By matching	By matching	By matching	By MS/MS	By matching	By matching	By MS/MS	By MS/MS	By matching	By MS/MS	By matching
AEETAVYYCAR	gi|371446908	1331.58	666.791	2	157.78	11	0	Unmodified	0	394420	1041300	0	930170	496540	0	450070	0	500840	517180	0	432720	0	529070	916000	568760	449100	0	1986300	0	1115200	0	0	357140	958190	469760	857050	By matching	By MS/MS	By MS/MS	By matching	By MS/MS	By MS/MS	By matching	By MS/MS	By matching	By MS/MS	By MS/MS	By matching	By MS/MS
AEGTAVYYCAR	gi|371446025	1259.56	630.78	2	103.31	11	0	Unmodified	86960	73840	153150	151260	0	0	109820	90166	98923	0	0	125940	122390	0	0	0	106940	183130	0	147960	0	0	0	128160	91931	0	83443	256380	By matching	By matching	By MS/MS	By matching	By matching	By matching	By matching	By matching	By matching	By matching	By matching	By matching	By matching
AEQLLESGGGLVQPGGSLR	gi|247425556	1866.98	934.49	2	188.27	19	0	Unmodified	0	0	0	2716500	0	0	0	0	8286700	0	0	0	7090200	0	3767800	0	10099000	2101000	0	3162100	0	0	1618600	0	0	6193900	2519900	0	By matching	By matching	By matching	By MS/MS	By matching	By matching	By matching	By matching	By MS/MS	By matching	By matching	By matching	By MS/MS
AEQLVESGGGLVQPGGSLR	gi|33319690	1852.96	927.482	2	190.1	19	0	Unmodified	0	0	3667700	0	0	3192500	0	0	5657600	4639900	4317500	0	5565200	13515000	1076400	7389700	4279200	0	5344200	0	6686500	0	2056000	1386700	0	663920	1395200	2536700	By matching	By matching	By MS/MS	By matching	By matching	By MS/MS	By matching	By matching	By MS/MS	By MS/MS	By MS/MS	By matching	By MS/MS
AEVQLVESGGGLVQPGGSLR	gi|106898845	1952.03	977.016	2	166.47	20	0	Unmodified	0	0	0	0	0	1247700	0	742140	0	639330	0	0	0	0	0	0	3911200	2687900	3674900	0	1899200	0	1594200	0	0	0	0	0	By matching	By matching	By matching	By matching	By matching	By MS/MS	By matching	By MS/MS	By matching	By matching	By matching	By matching	By matching
AEVQLVESGGGVVQPGR	gi|122892184	1680.88	841.44	2	79.337	17	0	Unmodified	0	0	0	0	0	0	408130	0	0	0	0	0	0	0	0	0	0	0	712660	0	0	0	0	0	0	0	0	0	By matching	By matching	By matching	By matching	By matching	By matching	By MS/MS	By matching	By matching	By matching	By matching	By matching	By matching
AEVQLVESGGVAVQPGGSLR	gi|106897229	1952.03	977.016	2	145.88	20	0	Unmodified	0	0	0	0	0	0	0	0	0	0	0	0	0	0	0	0	0	0	0	986820	0	0	0	1275400	0	3290000	0	0	By matching	By matching	By matching	By matching	By matching	By matching	By matching	By matching	By matching	By matching	By matching	By matching	By matching
AEVQLVQSGAEVK	gi|453056203	1356.72	679.362	2	168.93	13	0	Unmodified	0	0	0	716100	0	0	0	0	0	0	0	0	0	0	0	0	0	0	0	0	0	0	0	0	0	0	0	0	By matching	By matching	By matching	By MS/MS	By matching	By matching	By matching	By matching	By matching	By matching	By matching	By matching	By matching
AEYWGQGTLVTVSSASTK	gi|304562808	1883.93	942.963	2	124.73	18	0	Unmodified	0	5176700	0	0	0	0	0	0	0	0	0	0	0	0	0	0	0	208850	0	0	171560	0	0	0	0	0	58480	0	By matching	By MS/MS	By matching	By matching	By matching	By matching	By matching	By matching	By matching	By matching	By matching	By matching	By matching
AFDICGQGTVVTVSSASTK	gi|304562281	1926.94	964.468	2	94.325	19	0	Unmodified	0	0	0	0	0	0	0	0	0	0	0	0	0	2197300	0	0	0	0	1376600	0	0	0	0	0	0	0	0	0	By matching	By matching	By matching	By matching	By matching	By matching	By matching	By matching	By matching	By matching	By matching	By matching	By matching
AFDLWGQGTR	gi|53988140	1149.56	575.778	2	145.28	10	0	Unmodified	862390	0	0	0	0	0	0	0	0	0	0	0	0	0	0	0	0	0	0	0	0	0	0	0	0	0	0	0	By MS/MS	By matching	By matching	By matching	By matching	By matching	By matching	By matching	By matching	By matching	By matching	By matching	By matching
AFDYWGQGTLVTVSSASTK	gi|46254035	2016.98	1009.49	2	178.71	19	0	Unmodified	0	286930	294700	0	0	0	0	0	527860	237220	1033600	0	0	2229700	0	0	424810	0	0	0	0	0	0	591710	0	0	243740	493360	By matching	By matching	By matching	By matching	By matching	By matching	By matching	By matching	By matching	By matching	By MS/MS	By matching	By matching
AGDTALYYCAR	gi|732549885	1259.56	630.78	2	164.33	11	0	Unmodified	0	0	0	0	0	0	0	0	0	0	0	0	0	0	0	0	0	0	0	775890	0	0	0	0	0	0	0	0	By matching	By matching	By matching	By matching	By matching	By matching	By matching	By matching	By matching	By matching	By matching	By matching	By matching
AGDTAVYYCAR	gi|685425871	1245.54	623.772	2	118.23	11	0	Unmodified	0	0	0	0	0	0	0	0	0	167020	0	0	143190	0	0	0	164860	152490	283190	0	255790	0	0	162170	133320	273550	0	0	By matching	By matching	By matching	By matching	By matching	By matching	By matching	By matching	By matching	By MS/MS	By matching	By matching	By matching
AGETAVYYCAR	gi|75707557	1259.56	630.78	2	84.198	11	0	Unmodified	0	0	0	0	0	0	0	0	0	217970	0	0	0	165230	0	147990	0	0	107510	0	103370	78093	72551	0	22860	114210	0	256380	By matching	By matching	By matching	By matching	By matching	By matching	By matching	By matching	By matching	By MS/MS	By matching	By matching	By matching
AGGSFDYWGQGTLVTVSSASTK	gi|4837921	2218.05	1110.03	2	103.28	22	0	Unmodified	0	0	0	0	0	0	0	0	0	0	0	0	0	390090	0	0	0	522730	0	0	0	0	0	0	0	0	0	0	By matching	By matching	By matching	By matching	By matching	By matching	By matching	By matching	By matching	By matching	By matching	By matching	By matching
AGQAPVLVIYK	gi|3142472	1157.68	579.84	2	129.85	11	0	Unmodified	171680	0	421090	202630	182400	600440	832920	123740	399240	1291800	157130	232830	0	449590	580580	626760	197560	214040	171780	139040	281970	162610	120740	275490	183660	438010	100920	178570	By matching	By matching	By matching	By matching	By matching	By MS/MS	By MS/MS	By matching	By matching	By MS/MS	By matching	By matching	By matching
AGQPPKLLIYWASTR	gi|2791967	1699.94	850.971	2	110.38	15	1	Unmodified	1428500	362450	303710	0	0	491750	612800	220180	344730	0	2878900	241580	116940	0	353380	1107000	0	894990	0	0	707030	161260	0	0	0	1300100	0	0	By matching	By matching	By matching	By matching	By matching	By matching	By MS/MS	By matching	By matching	By matching	By MS/MS	By matching	By matching
AGQPPNLLIYWASTR	gi|70798805	1685.89	843.944	2	95.264	15	0	Unmodified	0	0	0	0	0	0	0	0	264950	0	811080	0	0	0	0	0	0	6610700	0	325300	0	150830	0	0	255280	0	0	0	By matching	By matching	By matching	By matching	By matching	By matching	By matching	By matching	By matching	By matching	By MS/MS	By matching	By matching
AGQSISNYLNWYQQK	gi|695942937	1798.86	900.432	2	89.136	15	0	Unmodified	0	0	0	0	0	0	0	0	0	0	0	0	0	0	0	0	0	0	1785900	0	0	0	0	0	0	0	0	0	By matching	By matching	By matching	By matching	By matching	By matching	By matching	By matching	By matching	By matching	By matching	By matching	By matching
AGQSPQLLIYLGSNR	gi|453071224	1615.87	808.934	2	171.15	15	0	Unmodified	0	0	528240	0	0	0	0	1230300	0	0	485530	380190	1467200	0	726180	471160	1450700	0	0	0	0	0	0	556390	158160	1739300	312060	0	By matching	By matching	By matching	By matching	By matching	By matching	By matching	By MS/MS	By matching	By matching	By MS/MS	By matching	By MS/MS
AGVETTKPSK	gi|166007177	1016.55	509.275	2	183.85	10	1	Unmodified	2374300	8001000	4969600	18412000	5972700	8086300	4328300	7399600	9552100	4917000	5942600	9595000	9233300	12034000	9014700	16256000	11288000	9433300	9266600	5421000	7226300	3210900	8180100	6188400	5844400	3354200	5234700	10602000	By MS/MS	By MS/MS	By matching	By MS/MS	By matching	By matching	By MS/MS	By matching	By MS/MS	By matching	By MS/MS	By MS/MS	By MS/MS
AGVETTTPSK	gi|16554039	989.503	495.751	2	215.72	10	0	Unmodified	15114000	25176000	17473000	32676000	19687000	21381000	15773000	16731000	55195000	23693000	26667000	26112000	22001000	33371000	45911000	36980000	27349000	42020000	17912000	16589000	30168000	22140000	29243000	29854000	23816000	18077000	15445000	42224000	By MS/MS	By MS/MS	By MS/MS	By MS/MS	By MS/MS	By MS/MS	By MS/MS	By MS/MS	By MS/MS	By MS/MS	By MS/MS	By MS/MS	By MS/MS
AGVETTTPSKQSNNKYAASSYLSLTPEQWK	gi|16554039	3285.62	1643.81	2	197.47	30	2	Unmodified	27810000	23810000	22956000	3096200	6241100	7996700	17987000	7527700	3399200	4156300	9771100	8876900	6245900	4446500	7626900	33938000	31987000	11527000	9397100	6348900	31765000	14711000	9396800	8637300	11689000	18865000	15124000	16638000	By MS/MS	By MS/MS	By MS/MS	By matching	By MS/MS	By MS/MS	By MS/MS	By MS/MS	By matching	By MS/MS	By MS/MS	By MS/MS	By MS/MS
AIQMTQSPSSLSASVGDR	gi|662564787	1833.89	917.945	2	232.37	18	0	Unmodified	465080	2179700	1080500	3522600	5662400	1499400	444410	295620	1731700	1426300	553770	466600	970490	4559100	553350	168920	400820	376170	403130	366990	242070	364510	305670	0	247800	221690	158090	190760	By matching	By MS/MS	By MS/MS	By MS/MS	By MS/MS	By MS/MS	By matching	By matching	By MS/MS	By MS/MS	By matching	By matching	By MS/MS
AIQVTQSPSSLSASVGDR	gi|630868893	1801.92	901.958	2	192.6	18	0	Unmodified	110020	342110	0	0	199180	149260	566320	653830	229980	152040	0	155270	114190	452280	0	156360	220080	320430	0	0	166100	0	473980	125120	116510	0	70603	379650	By matching	By matching	By matching	By matching	By matching	By matching	By MS/MS	By MS/MS	By matching	By matching	By matching	By matching	By matching
ALDCSSSIRQPSLHMSAAAASR	gi|51476663	2315.11	772.704	3	57.537	22	1	Unmodified	0	0	1070400	915910	1048400	1056500	1629700	886830	1624200	1457800	1543900	1251800	1232900	1998100	1166100	0	823800	767430	0	0	0	0	0	0	267570	0	795800	1657300	By matching	By matching	By matching	By matching	By matching	By matching	By matching	By matching	By matching	By matching	By MS/MS	By matching	By matching
ALDIWGQGTMVTVSSASTK	gi|304562678	1950.97	976.486	2	106.31	19	0	Unmodified	1190900	0	0	1046500	0	0	0	0	1293700	0	1814900	0	0	7045900	0	0	0	0	0	0	0	0	0	0	0	1841400	0	0	By MS/MS	By matching	By matching	By matching	By matching	By matching	By matching	By matching	By matching	By matching	By matching	By matching	By matching
ALEWLAHLFSNDEK	gi|118406223	1671.83	836.913	2	178.67	14	0	Unmodified	0	361480	556260	377540	0	645370	935230	0	905490	693610	0	394000	0	0	362650	0	209090	0	0	243170	0	0	0	0	0	0	0	0	By matching	By matching	By MS/MS	By matching	By matching	By MS/MS	By MS/MS	By matching	By MS/MS	By MS/MS	By matching	By matching	By matching
ALEWLAR	gi|46253996	857.476	429.738	2	191.91	7	0	Unmodified	3762700	2576800	0	3331600	2410200	2155100	6107300	1642500	4373500	2592200	0	0	2172200	1498100	1747700	6370800	2594700	0	1473400	4222400	5076200	2556800	0	0	0	4603400	0	3510300	By MS/MS	By MS/MS	By matching	By MS/MS	By MS/MS	By MS/MS	By MS/MS	By MS/MS	By MS/MS	By MS/MS	By matching	By matching	By matching
ALIYAASSLQSGVPSR	gi|259090249	1618.87	810.434	2	91.657	16	0	Unmodified	0	0	0	0	0	0	0	0	0	0	0	0	0	0	0	581850	0	0	0	708670	0	0	0	0	0	0	0	0	By matching	By matching	By matching	By matching	By matching	By matching	By matching	By matching	By matching	By matching	By matching	By matching	By matching
ALIYLASTLQSGVPSR	gi|18025706	1674.93	838.465	2	165.89	16	0	Unmodified	1652100	2473700	3378600	1878300	7000100	4036100	4512000	2261900	4844700	5131600	5436600	4490300	4952100	7906800	4308100	2617700	3640800	3111800	3078200	6042300	2299800	2217100	2417200	1708900	908360	4243700	2060800	3846900	By MS/MS	By MS/MS	By MS/MS	By matching	By MS/MS	By MS/MS	By MS/MS	By MS/MS	By MS/MS	By MS/MS	By MS/MS	By MS/MS	By MS/MS
ALQLTQSPSSLSASVGDR	gi|312207904	1815.93	908.966	2	204.51	18	0	Unmodified	0	0	0	0	0	0	0	0	0	0	0	0	0	0	0	0	0	6099900	0	0	0	0	0	0	0	13754000	0	0	By matching	By matching	By matching	By matching	By matching	By matching	By matching	By matching	By matching	By matching	By matching	By matching	By matching
ALQLVESGGGLVQPGGSLR	gi|4456522	1837.01	919.503	2	77.668	19	0	Unmodified	0	0	0	0	0	0	0	0	0	0	0	0	0	0	0	0	0	0	12080000	0	0	0	0	0	0	0	0	0	By matching	By matching	By matching	By matching	By matching	By matching	By matching	By matching	By matching	By matching	By matching	By matching	By matching
AMDVWGQGTTVIVSSASTK	gi|304562315	1936.96	969.478	2	117.37	19	0	Unmodified	0	0	365400	2401700	0	0	193360	334210	0	0	0	324370	0	1213100	518740	0	0	855470	0	1131600	0	0	0	0	0	0	0	0	By matching	By matching	By matching	By MS/MS	By matching	By matching	By matching	By matching	By matching	By matching	By matching	By matching	By matching
AMHGELQK	gi|119607089	912.449	457.224	2	89.55	8	0	Unmodified	0	0	0	0	0	0	0	0	0	0	0	0	0	0	0	0	0	0	0	0	0	0	0	0	0	0	0	0	By matching	By matching	By matching	By matching	By matching	By matching	By matching	By matching	By matching	By matching	By matching	By matching	By matching
AMQLTQSPSSLSASVGDR	gi|18092618	1833.89	917.945	2	130.56	18	0	Unmodified	0	0	768720	0	0	0	0	0	0	0	0	0	0	0	0	0	0	0	0	0	0	0	0	0	0	0	0	0	By matching	By matching	By MS/MS	By matching	By matching	By matching	By matching	By matching	By matching	By matching	By matching	By matching	By matching
ANPTVTLFPPSSEELQANK	gi|166007177	2042.03	1022.02	2	253.73	19	0	Unmodified	23352000	41949000	33405000	57254000	39103000	35755000	33652000	31795000	46114000	47393000	48086000	57956000	45359000	54137000	59192000	74127000	68642000	51225000	53508000	38192000	38798000	26065000	28529000	49757000	41774000	41628000	41089000	65953000	By MS/MS	By MS/MS	By MS/MS	By MS/MS	By MS/MS	By MS/MS	By MS/MS	By MS/MS	By MS/MS	By MS/MS	By MS/MS	By MS/MS	By MS/MS
ANQNIGTYLAWYQQK	gi|353255218	1796.88	899.442	2	109.6	15	0	Unmodified	0	0	0	0	0	0	0	0	0	0	0	0	0	695200	0	0	0	0	0	0	0	0	0	0	0	0	0	0	By matching	By matching	By matching	By matching	By matching	By matching	By matching	By matching	By matching	By matching	By matching	By matching	By matching
ANSYTTEYAASVK	gi|49072961	1403.66	702.828	2	81.992	13	0	Unmodified	0	477590	243170	0	150860	256080	0	349580	150000	0	191080	230000	0	350150	584750	0	0	0	309200	0	243210	125090	229780	227730	358760	0	0	0	By matching	By MS/MS	By matching	By matching	By matching	By matching	By matching	By matching	By matching	By matching	By matching	By matching	By matching
APDLLIYK	gi|18025678	931.538	466.769	2	111.95	8	0	Unmodified	76798	0	0	0	0	0	0	73729	0	0	0	80719	0	360190	0	0	0	194510	0	0	0	0	0	0	0	0	64785	0	By matching	By matching	By matching	By matching	By matching	By matching	By matching	By matching	By matching	By matching	By matching	By matching	By matching
APELLIYGASTLQSGVPSR	gi|1673593	1958.05	980.024	2	85.203	19	0	Unmodified	0	0	0	0	0	0	0	0	0	0	0	0	0	0	0	0	0	0	0	0	0	0	0	0	0	0	384680	0	By matching	By matching	By matching	By matching	By matching	By matching	By matching	By matching	By matching	By matching	By matching	By matching	By matching
APELLIYR	gi|87879	973.56	487.78	2	138.54	8	0	Unmodified	0	0	0	0	0	542640	0	0	0	0	0	0	0	0	0	0	0	0	0	0	0	0	0	372670	115120	0	0	0	By matching	By matching	By matching	By matching	By matching	By MS/MS	By matching	By matching	By matching	By matching	By matching	By matching	By matching
APEVLIYK	gi|821350520	931.538	466.769	2	107.01	8	0	Unmodified	0	0	0	0	0	0	338440	61007	0	0	0	0	562480	0	0	0	0	0	86247	0	0	0	0	0	0	0	0	0	By matching	By matching	By matching	By matching	By matching	By matching	By MS/MS	By matching	By matching	By matching	By matching	By matching	By MS/MS
APEWLAVIYWDDDKR	gi|3928180	1875.92	938.958	2	122.78	15	1	Unmodified	0	0	0	2212300	0	0	0	0	0	0	0	0	0	0	0	0	0	0	0	0	0	0	0	0	0	0	0	0	By matching	By matching	By matching	By MS/MS	By matching	By matching	By matching	By matching	By matching	By matching	By matching	By matching	By matching
APGAVVQSGAEVK	gi|122892060	1211.65	606.826	2	148.56	13	0	Acetyl (Protein N-term)	193960	253540	731690	158460	0	529040	604360	380840	3364400	546680	315820	1289700	555770	1201600	1371800	0	0	617710	511340	230350	413550	298290	239990	823550	651180	1152100	813740	736280	By matching	By matching	By MS/MS	By matching	By matching	By MS/MS	By matching	By matching	By MS/MS	By matching	By matching	By MS/MS	By matching
APGAVVQSGAEVKKPGASVK	gi|122892060	1879.05	940.526	2	107.09	20	2	Acetyl (Protein N-term)	204240	211730	1102400	0	132950	0	267940	146680	539900	0	157270	0	0	0	534270	0	0	300740	0	0	200160	150980	0	0	127820	625500	328850	0	By matching	By matching	By MS/MS	By matching	By matching	By matching	By MS/MS	By matching	By MS/MS	By matching	By matching	By matching	By matching
APGIPDR	gi|694269986	724.387	363.193	2	79.116	7	0	Unmodified	0	0	0	0	0	0	67252	200140	295370	0	0	0	0	0	0	0	0	99504	72399	191340	0	51513	0	143450	0	0	0	95480	By matching	By matching	By matching	By matching	By matching	By matching	By matching	By matching	By MS/MS	By matching	By matching	By matching	By matching
APGVPDRFSGSGSGTDFTLK	gi|695943065	1994.97	998.485	2	78.674	20	1	Unmodified	0	0	334200	0	0	224300	344630	0	0	494420	854120	557150	357270	0	255720	0	333040	0	0	0	0	316570	444630	0	0	412430	0	247710	By matching	By matching	By matching	By matching	By matching	By matching	By matching	By matching	By matching	By matching	By matching	By matching	By matching
APKLLIYDASELQSGVPSR	gi|70797825	2043.1	1022.55	2	76.118	19	1	Unmodified	5143400	3614700	2944000	0	3711000	4043600	4222700	3414400	4179900	3089500	3850900	3807500	2666000	0	3225200	0	0	0	0	4141900	1431200	1171200	0	0	0	0	1091100	1617100	By matching	By matching	By matching	By matching	By matching	By matching	By matching	By matching	By matching	By matching	By matching	By matching	By matching
APKLLIYDASSLESGVPSR	gi|597960154	2002.07	1002.04	2	80.545	19	1	Unmodified	0	0	0	0	0	0	0	0	0	0	0	0	0	0	591640	972780	0	0	0	0	0	0	0	0	386190	0	0	0	By matching	By matching	By matching	By matching	By matching	By matching	By matching	By matching	By matching	By matching	By matching	By matching	By matching
APNLLIYAASSLHSGVPSR	gi|662564498	1952.05	651.683	3	86.777	19	0	Unmodified	0	0	0	0	304900	177970	0	0	0	0	0	0	0	0	0	0	322020	0	0	0	0	0	0	0	0	0	272010	0	By matching	By matching	By matching	By matching	By MS/MS	By matching	By matching	By matching	By matching	By matching	By matching	By matching	By matching
APNLLIYAASSLQGGVPSR	gi|13448015	1913.04	957.519	2	145.99	19	0	Unmodified	0	0	0	4982500	0	0	0	0	0	0	0	0	0	0	0	0	0	0	0	0	0	0	0	0	0	0	0	0	By matching	By matching	By matching	By MS/MS	By matching	By matching	By matching	By matching	By matching	By matching	By matching	By matching	By matching
APNLLIYAASSLQSGVPSR	gi|49257888	1943.05	972.524	2	108.34	19	0	Unmodified	0	345410	793570	256220	1089000	0	364510	246380	0	82557	583390	307340	0	1086900	0	0	626570	0	0	501170	114680	0	50872	0	0	0	140000	359610	By matching	By matching	By MS/MS	By matching	By MS/MS	By matching	By matching	By matching	By matching	By matching	By matching	By matching	By matching
APNLLIYAASTLR	gi|24412757	1401.8	701.899	2	131.35	13	0	Unmodified	0	241950	0	0	0	0	0	0	0	0	0	0	0	0	71469	0	0	0	0	0	0	0	0	0	0	0	0	0	By matching	By MS/MS	By matching	By matching	By matching	By matching	By matching	By matching	By matching	By matching	By matching	By matching	By matching
APNLLIYDASNLETGVPSR	gi|194173385	2029.05	1015.52	2	139.11	19	0	Unmodified	0	774240	306600	0	463830	415760	505910	171500	496880	493580	471720	396270	354120	434970	398940	0	0	258970	656260	541160	0	421350	557000	453510	0	0	203920	849890	By matching	By matching	By matching	By matching	By matching	By matching	By matching	By matching	By matching	By matching	By matching	By matching	By matching
APNLLIYDASNLQTGVPSR	gi|194173389	2028.06	1015.03	2	74.147	19	0	Unmodified	0	0	0	0	0	705470	0	0	0	0	0	0	0	0	0	0	0	0	0	0	0	0	0	0	0	0	0	0	By matching	By matching	By matching	By matching	By matching	By MS/MS	By matching	By matching	By matching	By matching	By matching	By matching	By matching
APNLLIYK	gi|323432880	930.554	466.277	2	172.15	8	0	Unmodified	1929100	913960	1159900	1466300	2128600	1729300	1286700	2867200	2282900	1133600	2100700	2452600	1965800	3166700	1174400	1195600	3180900	1164100	1792900	2393200	1738200	1165700	1050900	2231900	1056500	883760	1157100	1253200	By MS/MS	By MS/MS	By MS/MS	By MS/MS	By MS/MS	By MS/MS	By MS/MS	By MS/MS	By MS/MS	By MS/MS	By MS/MS	By MS/MS	By MS/MS
APNLLIYR	gi|4323820	958.56	480.28	2	111.82	8	0	Unmodified	0	0	128130	0	129370	106740	105190	0	410600	106960	158360	175020	133710	239160	203580	66046	177510	0	84517	251510	179450	79657	51949	298040	81570	0	88902	198770	By matching	By matching	By matching	By matching	By matching	By matching	By matching	By matching	By MS/MS	By matching	By matching	By matching	By matching
APNPLIYGASNLQSGVPSR	gi|4378270	1940.01	971.006	2	80.545	19	0	Unmodified	0	0	0	0	8011100	0	7492200	0	0	0	7324600	11353000	0	12821000	10500000	9814400	0	5952900	7611900	8168500	8176600	6866700	0	8142000	0	0	0	0	By matching	By matching	By matching	By matching	By matching	By matching	By matching	By matching	By matching	By matching	By matching	By matching	By matching
APQLLIYK	gi|323433159	944.569	473.285	2	122.13	8	0	Unmodified	271870	0	237940	180170	146810	113180	174000	138570	504300	0	206250	0	0	345410	0	307950	0	232310	195190	169390	0	315760	0	0	0	0	0	0	By MS/MS	By matching	By matching	By matching	By matching	By matching	By matching	By matching	By MS/MS	By matching	By matching	By matching	By matching
APTLLIYR	gi|1710419	945.565	473.782	2	115.49	8	0	Unmodified	0	0	0	0	0	0	0	0	0	0	0	0	0	370430	0	0	50932	0	0	0	0	0	0	0	69666	0	0	0	By matching	By matching	By matching	By matching	By matching	By matching	By matching	By matching	By matching	By matching	By matching	By matching	By matching
APVLLIFK	gi|821350554	899.584	450.792	2	138.85	8	0	Unmodified	0	0	0	0	0	0	0	0	0	0	0	0	0	0	357810	0	0	0	0	0	0	0	0	0	0	0	0	0	By matching	By matching	By matching	By matching	By matching	By matching	By matching	By matching	By matching	By matching	By matching	By matching	By matching
AQAGDEADYYCQVWDSR	gi|80975637	2032.82	1017.41	2	169.72	17	0	Unmodified	0	0	0	0	0	0	0	0	0	0	0	1331500	0	0	0	0	0	0	0	0	0	0	0	0	0	0	0	0	By matching	By matching	By matching	By matching	By matching	By matching	By matching	By matching	By matching	By matching	By matching	By MS/MS	By matching
AQSSLTSTSAFWVR	gi|119578122	1539.77	770.884	2	116.71	14	0	Unmodified	0	0	0	0	0	0	0	0	0	0	0	2581400	0	0	0	0	0	0	0	0	0	0	0	0	0	0	0	0	By matching	By matching	By matching	By matching	By matching	By matching	By matching	By matching	By matching	By matching	By matching	By MS/MS	By matching
ASALESGVPSR	gi|938186031	1072.55	537.276	2	98.182	11	0	Unmodified	119000	277290	120250	167490	137660	177050	236540	267120	95509	367380	1107400	191570	0	0	0	398710	0	335050	271410	243400	0	0	0	0	0	44171	0	0	By matching	By MS/MS	By matching	By matching	By matching	By matching	By matching	By matching	By matching	By matching	By MS/MS	By matching	By matching
ASDLESGVPSR	gi|58222998	1116.54	559.271	2	114.71	11	0	Unmodified	334250	0	0	0	0	408200	0	0	583510	0	649280	0	0	0	370730	605120	0	0	0	236460	0	0	0	0	0	0	0	373540	By MS/MS	By matching	By matching	By matching	By matching	By MS/MS	By matching	By matching	By MS/MS	By MS/MS	By matching	By MS/MS	By MS/MS
ASDSALYYCAR	gi|7438705	1275.56	638.778	2	135.86	11	0	Unmodified	0	0	0	0	208930	0	122040	0	0	0	0	0	0	0	0	0	238130	0	0	0	145530	0	0	302620	909870	0	0	209050	By matching	By matching	By matching	By MS/MS	By MS/MS	By matching	By matching	By matching	By matching	By matching	By matching	By matching	By matching
ASDTAIYYCTR	gi|388778128	1319.58	660.791	2	121.02	11	0	Unmodified	142090	0	0	0	0	0	0	0	0	0	0	0	0	59473	0	382120	0	69139	0	0	0	0	0	0	0	0	0	0	By matching	By matching	By matching	By matching	By matching	By matching	By matching	By matching	By matching	By matching	By matching	By matching	By matching
ASDTALYFCAR	gi|4097066	1273.58	637.788	2	159.83	11	0	Unmodified	145810	85098	286120	160210	85231	297620	0	186550	556840	279990	0	139840	49459	182690	108030	331890	610010	232510	144360	168580	189730	0	207310	222840	196300	218740	0	0	By matching	By matching	By matching	By matching	By matching	By matching	By matching	By matching	By matching	By matching	By matching	By matching	By matching
ASDTALYYCAR	gi|56786088	1289.57	645.785	2	195.27	11	0	Unmodified	2087400	874360	2380400	1710100	959970	1374700	1027600	1136500	1965800	1223700	1254700	1462600	772640	1678400	1280400	1608200	2146700	1430700	652050	1503500	969730	0	1391500	1527000	1298300	1159700	741370	0	By MS/MS	By MS/MS	By MS/MS	By MS/MS	By MS/MS	By MS/MS	By MS/MS	By MS/MS	By MS/MS	By MS/MS	By MS/MS	By MS/MS	By MS/MS
ASDTAMYYCAR	gi|761232722	1307.53	654.764	2	145.46	11	0	Unmodified	180080	139640	229400	664210	208190	254850	117860	117880	314560	104910	153710	54750	127440	279450	77471	66066	74452	45945	53279	141350	109880	54101	132230	43205	49719	35708	97550	64662	By matching	By MS/MS	By MS/MS	By MS/MS	By MS/MS	By MS/MS	By matching	By matching	By MS/MS	By matching	By matching	By matching	By matching
ASDTATYYCAR	gi|4097058	1277.53	639.767	2	147.62	11	0	Unmodified	234380	47366	171300	675000	90762	154980	52797	132750	244430	108570	127530	47996	0	94955	106810	263820	63664	115000	0	104940	131770	93118	95345	79631	59788	258790	59686	166360	By MS/MS	By matching	By MS/MS	By MS/MS	By matching	By MS/MS	By matching	By MS/MS	By MS/MS	By MS/MS	By matching	By matching	By matching
ASDTAVYYCAR	gi|5305663	1275.56	638.778	2	99.568	11	0	Unmodified	0	0	0	0	0	299160	0	0	0	0	0	0	0	0	0	0	0	0	0	0	0	0	0	0	0	0	0	0	By matching	By matching	By matching	By matching	By matching	By MS/MS	By matching	By matching	By matching	By matching	By matching	By matching	By matching
ASDTGIYFCAR	gi|46253889	1259.56	630.78	2	143.4	11	0	Unmodified	183910	0	0	0	0	0	0	0	169620	0	0	134540	0	0	0	0	186960	0	0	0	0	0	46294	109890	0	0	591860	0	By matching	By matching	By matching	By matching	By matching	By matching	By matching	By matching	By matching	By matching	By matching	By matching	By matching
ASDTGIYYCAR	gi|185277	1275.56	638.778	2	159.83	11	0	Unmodified	328210	0	253860	0	0	299160	0	119200	190640	257760	0	185470	0	204350	0	454250	238130	0	99165	200920	0	0	225200	302620	909870	0	152180	209050	By MS/MS	By matching	By MS/MS	By matching	By matching	By MS/MS	By matching	By MS/MS	By matching	By MS/MS	By matching	By matching	By matching
ASDTGVYYCAR	gi|4097070	1261.54	631.77	2	93.442	11	0	Unmodified	62797	0	196570	0	0	78093	0	0	0	0	0	0	0	0	0	156160	0	0	0	0	0	0	50975	0	0	0	0	0	By matching	By matching	By MS/MS	By matching	By matching	By matching	By matching	By matching	By matching	By matching	By matching	By matching	By matching
ASDYTFSSYGISWVR	gi|194376338	1737.8	869.9	2	107.11	15	0	Unmodified	0	0	0	0	0	0	0	0	0	0	739190	0	0	0	0	0	0	0	0	0	0	0	0	0	0	0	0	0	By matching	By matching	By matching	By matching	By matching	By matching	By matching	By matching	By matching	By matching	By MS/MS	By matching	By matching
ASEIVLTQSPGTLSLSPGER	gi|46575859	2041.07	1021.53	2	110.33	20	0	Unmodified	0	0	0	0	0	777600	0	0	0	0	0	0	0	0	0	0	0	0	0	0	0	0	0	0	0	0	0	0	By matching	By matching	By matching	By matching	By matching	By MS/MS	By matching	By matching	By matching	By matching	By matching	By matching	By matching
ASESISNWLAWYQQK	gi|75707529	1809.87	905.934	2	81.128	15	0	Unmodified	0	0	0	0	0	0	0	0	0	0	0	0	0	0	0	0	0	0	0	0	0	0	0	0	0	0	0	890560	By matching	By matching	By matching	By matching	By matching	By matching	By matching	By matching	By matching	By matching	By matching	By matching	By matching
ASESISYWLAWYQQK	gi|77378158	1858.89	930.444	2	98.942	15	0	Unmodified	0	0	0	0	0	0	0	0	0	0	0	0	0	0	0	0	0	0	0	0	0	0	0	0	809760	0	0	0	By matching	By matching	By matching	By matching	By matching	By matching	By matching	By matching	By matching	By matching	By matching	By matching	By matching
ASGDSFSSYAISWVR	gi|815069136	1631.76	816.879	2	88.075	15	0	Unmodified	0	0	0	3024700	0	0	0	0	0	0	0	0	0	0	0	0	0	0	0	0	0	0	0	0	0	0	0	0	By matching	By matching	By matching	By MS/MS	By matching	By matching	By matching	By matching	By matching	By matching	By matching	By matching	By matching
ASGDTFSIYAVSWVR	gi|118406193	1657.81	829.905	2	99.927	15	0	Unmodified	0	0	0	0	0	0	0	0	0	0	0	0	299430	0	0	0	0	0	0	0	0	0	0	0	0	0	0	0	By matching	By matching	By matching	By matching	By matching	By matching	By matching	By matching	By matching	By matching	By matching	By matching	By MS/MS
ASGDTFSNYAISWVR	gi|695943173	1672.78	837.392	2	138.73	15	0	Unmodified	0	0	0	0	0	0	0	0	0	0	0	0	878570	0	0	0	0	0	0	0	0	0	0	0	0	0	99026	0	By matching	By matching	By matching	By matching	By matching	By matching	By matching	By matching	By matching	By matching	By matching	By matching	By MS/MS
ASGDTFSSYAISWVR	gi|118137445	1645.77	823.887	2	96.247	15	0	Unmodified	0	0	0	0	0	0	0	0	0	0	0	0	0	469480	0	0	0	0	0	0	0	0	0	0	0	0	0	0	By matching	By matching	By matching	By matching	By matching	By matching	By matching	By matching	By matching	By matching	By matching	By matching	By matching
ASGGIFNSYAISWVR	gi|585379867	1626.82	814.408	2	115.09	15	0	Unmodified	0	0	0	0	0	0	0	0	0	0	0	0	0	0	0	0	0	0	0	0	0	0	0	0	0	0	0	510360	By matching	By matching	By matching	By matching	By matching	By matching	By matching	By matching	By matching	By matching	By matching	By matching	By matching
ASGGIFSNYAISWVR	gi|611962616	1626.82	814.408	2	116.78	15	0	Unmodified	0	0	0	0	0	0	0	0	0	0	0	0	0	0	0	0	0	0	0	0	0	0	0	0	0	0	0	510360	By matching	By matching	By matching	By matching	By matching	By matching	By matching	By matching	By matching	By matching	By matching	By matching	By matching
ASGGSFISYAIGWVR	gi|683427614	1569.79	785.897	2	88.224	15	0	Unmodified	0	0	0	0	0	0	0	0	0	0	0	0	506280	0	0	0	0	0	0	0	0	0	0	0	0	0	0	0	By matching	By matching	By matching	By matching	By matching	By matching	By matching	By matching	By matching	By matching	By matching	By matching	By MS/MS
ASGGSFSNYGLSWVR	gi|70798516	1586.75	794.374	2	103.83	15	0	Unmodified	0	0	0	5408100	0	0	0	661680	0	0	0	0	0	0	0	0	0	0	0	0	0	0	0	0	532050	0	0	116470	By matching	By matching	By matching	By MS/MS	By matching	By matching	By matching	By matching	By matching	By matching	By matching	By matching	By matching
ASGGSISTYTISWVR	gi|910276662	1583.79	792.897	2	95.264	15	0	Unmodified	0	0	0	0	0	0	0	0	0	0	0	0	0	3816200	0	0	0	0	0	0	0	0	0	0	0	0	0	0	By matching	By matching	By matching	By matching	By matching	By matching	By matching	By matching	By matching	By matching	By matching	By matching	By matching
ASGGTFDSYAISWVR	gi|323430869	1615.76	808.882	2	127.32	15	0	Unmodified	0	0	0	0	0	0	0	0	0	0	0	0	0	0	0	0	0	0	0	0	0	0	0	0	0	0	527240	0	By matching	By matching	By matching	By matching	By matching	By matching	By matching	By matching	By matching	By matching	By matching	By matching	By matching
ASGGTFGNYGIAWVR	gi|304562139	1554.76	778.379	2	80.96	15	0	Unmodified	0	0	0	0	0	0	0	0	0	0	0	0	0	0	0	0	0	0	0	0	1532700	0	399510	0	0	0	0	0	By matching	By matching	By matching	By matching	By matching	By matching	By matching	By matching	By matching	By matching	By matching	By matching	By matching
ASGGTFGSYGINWVR	gi|315488062	1570.75	786.376	2	156.6	15	0	Unmodified	315100	0	0	0	0	0	0	0	0	0	0	0	0	7496800	0	0	0	0	0	0	0	0	0	0	0	0	0	0	By matching	By matching	By matching	By matching	By matching	By matching	By matching	By matching	By matching	By matching	By matching	By matching	By matching
ASGGTFNNYALSWVR	gi|611962570	1641.79	821.895	2	138.73	15	0	Unmodified	0	0	0	0	0	0	0	405930	266250	0	0	0	970870	323610	0	0	0	0	0	260900	0	0	0	0	0	0	0	0	By matching	By matching	By matching	By matching	By matching	By matching	By matching	By matching	By matching	By matching	By matching	By matching	By MS/MS
ASGGTFNNYVISWVR	gi|815069745	1669.82	835.911	2	87.863	15	0	Unmodified	0	0	0	0	630690	0	0	0	0	0	0	0	0	0	0	0	0	0	0	0	0	0	0	0	0	0	0	0	By matching	By matching	By matching	By matching	By MS/MS	By matching	By matching	By matching	By matching	By matching	By matching	By matching	By matching
ASGGTFNSYAINWVR	gi|304563886	1641.79	821.895	2	104.95	15	0	Unmodified	0	0	0	0	0	0	0	0	0	0	0	0	0	0	0	0	0	701970	0	0	0	0	0	331530	0	0	0	0	By matching	By matching	By matching	By matching	By matching	By matching	By matching	By matching	By matching	By matching	By matching	By matching	By matching
ASGGTFNSYAISWVR	gi|696826227	1614.78	808.39	2	113.53	15	0	Unmodified	0	0	658540	998360	0	0	0	0	438410	0	0	0	0	0	0	0	0	253930	0	0	361280	655310	0	117700	0	0	0	1989200	By matching	By matching	By MS/MS	By MS/MS	By matching	By matching	By matching	By matching	By MS/MS	By matching	By matching	By matching	By matching
ASGGTFNSYGINWVR	gi|304563390	1627.77	814.887	2	141.59	15	0	Unmodified	0	0	0	0	679970	0	0	0	710050	0	0	0	2249100	0	1340500	425030	0	0	0	0	0	0	0	0	0	0	0	0	By matching	By matching	By matching	By matching	By matching	By matching	By matching	By matching	By MS/MS	By matching	By matching	By matching	By MS/MS
ASGGTFNSYGISWVR	gi|910276642	1600.76	801.382	2	129.77	15	0	Unmodified	0	0	0	0	0	0	0	0	0	0	0	0	0	0	0	0	0	0	0	0	0	0	0	0	0	0	1135700	0	By matching	By matching	By matching	By matching	By matching	By matching	By matching	By matching	By matching	By matching	By matching	By matching	By matching
ASGGTFSDFAVTWVR	gi|219566201	1599.77	800.884	2	78.505	15	0	Unmodified	0	0	0	0	0	0	0	0	0	0	0	0	0	0	614940	0	0	0	0	0	0	0	0	0	0	0	0	0	By matching	By matching	By matching	By matching	By matching	By matching	By matching	By matching	By matching	By matching	By matching	By matching	By matching
ASGGTFSDYAISWVR	gi|304563234	1615.76	808.882	2	154.72	15	0	Unmodified	0	0	0	0	0	0	0	164970	0	0	0	0	1327100	0	0	0	0	0	0	0	0	0	0	0	0	0	527240	0	By matching	By matching	By matching	By matching	By matching	By matching	By matching	By matching	By matching	By matching	By matching	By matching	By MS/MS
ASGGTFSGYTLSWVR	gi|304563196	1587.77	794.884	2	92.265	15	0	Unmodified	0	0	0	0	0	0	943520	0	0	0	0	0	0	0	0	0	0	0	0	0	0	478550	0	0	0	0	0	0	By matching	By matching	By matching	By matching	By matching	By matching	By MS/MS	By matching	By matching	By matching	By matching	By matching	By matching
ASGGTFSNDAINWVR	gi|13016661	1593.75	797.877	2	71.879	15	0	Unmodified	0	0	0	0	0	0	0	0	0	0	0	0	0	0	0	0	0	0	0	684960	0	0	0	0	0	0	0	0	By matching	By matching	By matching	By matching	By matching	By matching	By matching	By matching	By matching	By matching	By matching	By matching	By matching
ASGGTFSNYAINWVR	gi|42543654	1641.79	821.895	2	79.885	15	0	Unmodified	580910	0	0	0	0	0	0	0	0	0	0	0	0	0	0	0	0	0	0	0	0	0	0	0	0	0	0	0	By MS/MS	By matching	By matching	By matching	By matching	By matching	By matching	By matching	By matching	By matching	By matching	By matching	By matching
ASGGTFSNYAISWVR	gi|185362	1614.78	808.39	2	164.15	15	0	Unmodified	0	0	266340	998360	1303300	0	1614500	1771600	438410	0	0	1387400	1493300	1840600	0	0	0	0	0	734110	0	655310	0	0	0	0	319840	0	By matching	By matching	By MS/MS	By MS/MS	By MS/MS	By matching	By MS/MS	By MS/MS	By MS/MS	By matching	By matching	By MS/MS	By MS/MS
ASGGTFSNYAITWVR	gi|304562493	1628.79	815.397	2	163.64	15	0	Unmodified	0	330220	0	3852000	0	0	0	0	0	0	0	0	0	0	0	0	0	175390	0	0	0	0	0	0	0	377100	0	0	By matching	By matching	By matching	By MS/MS	By matching	By matching	By matching	By matching	By matching	By matching	By matching	By matching	By matching
ASGGTFSNYAVSWVR	gi|270046594	1600.76	801.382	2	97.767	15	0	Unmodified	0	0	0	0	0	0	0	0	0	0	0	0	0	763040	0	0	0	0	0	0	0	0	0	0	0	0	0	0	By matching	By matching	By matching	By matching	By matching	By matching	By matching	By matching	By matching	By matching	By matching	By matching	By matching
ASGGTFSNYGIGWVR	gi|39939661	1570.75	786.376	2	95.981	15	0	Unmodified	0	0	0	0	0	0	0	0	0	0	0	0	0	0	841260	0	0	0	0	0	0	0	0	0	0	0	189810	0	By matching	By matching	By matching	By matching	By matching	By matching	By matching	By matching	By matching	By matching	By matching	By matching	By matching
ASGGTFSNYGISWVR	gi|145942291	1600.76	801.382	2	141.06	15	0	Unmodified	0	542720	0	924600	871350	0	769900	476740	828490	0	0	450300	0	1457300	0	0	0	878850	0	200910	245520	0	0	0	0	0	0	0	By matching	By matching	By matching	By MS/MS	By MS/MS	By matching	By matching	By MS/MS	By matching	By matching	By matching	By matching	By matching
ASGGTFSNYTINWVR	gi|21670317	1671.8	836.9	2	110.51	15	0	Unmodified	0	0	0	0	0	0	0	0	0	0	0	8635800	0	0	0	0	0	0	0	0	1639600	0	0	0	0	0	0	0	By matching	By matching	By matching	By matching	By matching	By matching	By matching	By matching	By matching	By matching	By matching	By MS/MS	By matching
ASGGTFSNYVISWVR	gi|304562880	1642.81	822.405	2	149.35	15	0	Unmodified	0	0	0	0	0	0	0	0	0	0	0	0	371500	740730	88776	0	0	0	0	0	1036200	0	0	0	0	0	0	0	By matching	By matching	By matching	By matching	By matching	By matching	By matching	By matching	By matching	By matching	By matching	By matching	By matching
ASGGTFSSDAISWVR	gi|585379851	1539.73	770.866	2	151.56	15	0	Unmodified	182970	0	0	354280	0	0	0	0	0	0	0	0	0	2572800	0	0	0	0	0	0	0	0	0	0	0	0	0	0	By matching	By matching	By matching	By matching	By matching	By matching	By matching	By matching	By matching	By matching	By matching	By matching	By matching
ASGGTFSSDVVSWVR	gi|910276806	1553.75	777.874	2	106.58	15	0	Unmodified	0	0	3407800	0	0	0	0	0	0	0	0	0	0	0	0	0	0	0	0	0	0	0	0	0	0	0	0	0	By matching	By matching	By MS/MS	By matching	By matching	By matching	By matching	By matching	By matching	By matching	By matching	By matching	By matching
ASGGTFSSFGINWVR	gi|70798496	1584.77	793.384	2	114.21	15	0	Unmodified	0	0	0	467610	0	0	0	0	0	0	0	0	0	1158700	0	0	0	0	0	0	0	0	0	0	204310	0	0	0	By matching	By matching	By matching	By matching	By matching	By matching	By matching	By matching	By matching	By matching	By matching	By matching	By matching
ASGGTFSSSAINWVR	gi|304563655	1538.75	770.374	2	95.428	15	0	Unmodified	0	0	0	0	0	0	0	0	0	0	0	0	0	0	0	0	0	0	0	0	0	0	0	0	0	0	0	582900	By matching	By matching	By matching	By matching	By matching	By matching	By matching	By matching	By matching	By matching	By matching	By matching	By matching
ASGGTFSSTAINWVR	gi|21668632	1552.76	777.382	2	108.66	15	0	Unmodified	0	0	0	3366200	0	0	0	0	0	0	0	0	0	0	0	0	0	0	0	0	0	0	0	0	0	0	0	0	By matching	By matching	By matching	By MS/MS	By matching	By matching	By matching	By matching	By matching	By matching	By matching	By matching	By matching
ASGGTFSSYAINWVR	gi|194270608	1614.78	808.39	2	121.45	15	0	Unmodified	0	0	0	0	1303300	0	0	471740	0	0	0	0	0	1840600	0	0	0	0	0	0	0	0	0	0	0	0	0	0	By matching	By matching	By matching	By matching	By MS/MS	By matching	By matching	By MS/MS	By matching	By matching	By matching	By matching	By matching
ASGGTFSSYAISWLR	gi|910276546	1601.78	801.892	2	98.676	15	0	Unmodified	0	0	0	0	0	0	0	0	0	0	0	0	0	0	0	0	0	0	254930	0	0	360770	314590	0	0	0	0	0	By matching	By matching	By matching	By matching	By matching	By matching	By matching	By matching	By matching	By matching	By matching	By matching	By matching
ASGGTFSSYALSWVR	gi|260181781	1587.77	794.884	2	140.27	15	0	Unmodified	0	0	0	0	0	0	943520	1879400	522660	0	333320	1542700	1015400	2526300	1169900	146430	0	528560	899570	0	0	478550	172310	255550	0	832610	344850	0	By matching	By matching	By matching	By matching	By matching	By matching	By MS/MS	By MS/MS	By matching	By matching	By matching	By MS/MS	By MS/MS
ASGGTFSSYEINWVR	gi|910276742	1672.78	837.392	2	185.95	15	0	Unmodified	0	0	0	0	0	0	0	0	0	0	0	0	0	0	0	0	0	4417400	0	0	0	0	0	0	0	0	0	0	By matching	By matching	By matching	By matching	By matching	By matching	By matching	By matching	By matching	By matching	By matching	By matching	By matching
ASGGTFSSYGISWVR	gi|407943831	1573.75	787.876	2	125.36	15	0	Unmodified	0	384780	114640	377540	770050	0	0	1115500	0	0	0	0	0	0	0	0	0	146670	0	0	0	638590	0	0	0	686610	311990	0	By matching	By matching	By matching	By matching	By MS/MS	By matching	By matching	By MS/MS	By matching	By matching	By matching	By matching	By matching
ASGGTFSSYSISWVR	gi|611962475	1603.76	802.882	2	154.65	15	0	Unmodified	0	0	0	0	0	0	0	466950	0	0	0	3821700	0	468040	0	0	177860	0	0	0	298480	0	0	0	0	0	106030	0	By matching	By matching	By matching	By matching	By matching	By matching	By matching	By matching	By matching	By matching	By matching	By MS/MS	By matching
ASGGTFSSYVISWVR	gi|514995305	1615.8	808.9	2	97.203	15	0	Unmodified	0	0	0	0	0	0	443280	0	0	0	0	0	0	0	0	0	0	0	0	0	0	0	0	0	0	0	0	0	By matching	By matching	By matching	By matching	By matching	By matching	By MS/MS	By matching	By matching	By matching	By matching	By matching	By matching
ASGGTFSTYAINWVR	gi|910276728	1628.79	815.397	2	93.478	15	0	Unmodified	0	0	0	895720	0	0	0	0	0	0	0	0	0	0	0	0	0	0	0	0	0	0	0	0	0	0	0	0	By matching	By matching	By matching	By MS/MS	By matching	By matching	By matching	By matching	By matching	By matching	By matching	By matching	By matching
ASGGTFSTYGLSWVR	gi|2921524	1587.77	794.884	2	111.83	15	0	Unmodified	515140	514050	0	967390	979230	222480	943520	0	0	0	0	0	1015400	0	1169900	0	0	0	0	701750	0	0	0	0	0	0	0	538940	By matching	By matching	By matching	By matching	By MS/MS	By matching	By MS/MS	By matching	By matching	By matching	By matching	By matching	By MS/MS
ASGGTFYSYAISWVR	gi|815069803	1663.8	832.9	2	95.428	15	0	Unmodified	0	0	0	0	0	0	0	0	0	0	0	0	0	0	0	0	0	2499500	0	0	0	0	0	0	0	0	0	0	By matching	By matching	By matching	By matching	By matching	By matching	By matching	By matching	By matching	By matching	By matching	By matching	By matching
ASGIPAR	gi|344323273	670.376	336.188	2	81.297	7	0	Unmodified	0	0	0	0	0	0	0	0	0	0	0	0	0	0	0	137870	0	0	0	0	252770	0	0	0	0	135580	0	0	By matching	By matching	By matching	By matching	By matching	By MS/MS	By matching	By matching	By matching	By matching	By matching	By matching	By matching
ASGVPDKFSGSGSGTDFTLK	gi|5419711	1956.94	979.471	2	119.5	20	1	Unmodified	252150	98391	146010	0	0	0	0	0	0	0	292650	0	2667000	0	0	0	0	0	0	0	0	0	136030	0	117430	0	0	0	By matching	By matching	By matching	By matching	By matching	By matching	By matching	By matching	By matching	By matching	By matching	By matching	By MS/MS
ASGVPDRFSGSASGTDFTLK	gi|14588865	1998.96	1000.48	2	121.48	20	1	Unmodified	875480	1173000	2103800	908210	2651800	356430	0	179010	791100	0	0	856680	1258500	978600	632120	0	782810	0	494260	491100	0	1023000	854940	0	0	1776300	499580	339620	By matching	By MS/MS	By MS/MS	By matching	By MS/MS	By matching	By matching	By matching	By matching	By matching	By matching	By matching	By MS/MS
ASGVPDRFSGSGSATDFTLK	gi|33570516	1998.96	1000.48	2	109.77	20	1	Unmodified	391400	1173000	0	0	1225100	0	0	353870	0	440390	455640	0	0	0	0	0	0	0	0	159050	0	0	0	0	712000	0	0	382080	By matching	By MS/MS	By matching	By matching	By MS/MS	By matching	By matching	By matching	By matching	By matching	By matching	By matching	By matching
ASGVPDRFSGSGSETDFTLK	gi|21669393	2056.97	686.657	3	65.287	20	1	Unmodified	0	0	0	0	270970	0	629410	2124700	0	0	164510	267310	237930	0	360020	311910	0	0	0	0	0	473320	334340	0	108600	0	0	0	By matching	By matching	By matching	By matching	By matching	By matching	By matching	By MS/MS	By matching	By matching	By matching	By matching	By matching
ASGVPDRFSGSGSGTDFTLK	gi|218783338	1984.95	993.475	2	195.86	20	1	Unmodified	24258000	27959000	47633000	19331000	43499000	38457000	50724000	19613000	25059000	24862000	55082000	29953000	46899000	37223000	41851000	23176000	40248000	19539000	43249000	50927000	34076000	28052000	26624000	20179000	21764000	78553000	24003000	38195000	By MS/MS	By MS/MS	By MS/MS	By MS/MS	By MS/MS	By MS/MS	By MS/MS	By MS/MS	By MS/MS	By MS/MS	By MS/MS	By MS/MS	By MS/MS
ASGVPDRFSGSGSGTDFTLKISR	gi|218783338	2341.17	1171.58	2	115.99	23	2	Unmodified	2033600	757410	1093100	0	0	512480	950900	102110	0	0	2273100	885290	0	185410	561730	1344800	1632900	485170	555210	1178400	3690300	1444000	394810	7452000	2635100	12933000	1052500	719980	By matching	By matching	By matching	By matching	By matching	By matching	By matching	By matching	By matching	By matching	By matching	By matching	By matching
ASGVPDRFSGSGSGTDFTLR	gi|523391770	2012.96	671.985	3	131.37	20	1	Unmodified	1259300	876760	1792700	954990	1412200	1094100	837470	351330	0	825260	2258200	997960	878130	761370	1150300	932970	3091400	879760	1216200	562200	1475800	675230	747450	1197700	762780	1317800	590170	1204700	By MS/MS	By MS/MS	By MS/MS	By MS/MS	By MS/MS	By MS/MS	By MS/MS	By matching	By matching	By MS/MS	By MS/MS	By MS/MS	By MS/MS
ASGVPDRFSGSGSGTDFTLTISR	gi|197115402	2314.12	772.373	3	55.208	23	1	Unmodified	482940	0	0	0	584830	755060	488730	0	929240	0	424690	327220	668430	654490	535330	0	0	439730	798210	0	0	422060	457470	0	0	0	160420	269390	By matching	By matching	By matching	By matching	By matching	By matching	By matching	By matching	By matching	By matching	By matching	By matching	By matching
ASGVPDRFSGSGSGTEFTLK	gi|323432566	1998.96	1000.48	2	129.75	20	1	Unmodified	0	0	0	1712100	0	400580	565990	0	0	0	0	0	1225500	1051900	833830	399610	0	0	382390	479410	387860	1023000	0	363890	0	173710	0	0	By matching	By matching	By matching	By MS/MS	By matching	By MS/MS	By MS/MS	By matching	By matching	By matching	By matching	By matching	By MS/MS
ASGVPDRFSGSVSGTDFTLK	gi|353255216	2027	676.665	3	63.436	20	1	Unmodified	0	0	0	0	0	0	0	0	0	0	0	0	0	0	0	0	198190	0	0	189440	0	227190	104240	0	746010	182310	0	0	By matching	By matching	By matching	By matching	By matching	By matching	By matching	By matching	By matching	By matching	By matching	By matching	By matching
ASGVPDRFSGTGSGTDFTLK	gi|18041772	1998.96	1000.48	2	126.14	20	1	Unmodified	497390	1057600	0	0	933470	456390	1292600	0	497150	381990	1050800	1078600	1488500	0	410260	356320	1577900	0	476820	0	0	578890	593840	0	1313200	1664400	374260	399200	By matching	By MS/MS	By matching	By matching	By MS/MS	By matching	By MS/MS	By matching	By matching	By matching	By matching	By MS/MS	By MS/MS
ASGVPDRFTGSGSGTDFTLK	gi|481994	1998.96	667.322	3	49.066	20	1	Unmodified	0	0	0	0	0	0	0	326970	0	0	0	0	0	0	0	0	0	470470	0	0	0	0	0	268730	0	0	0	0	By matching	By matching	By matching	By matching	By matching	By matching	By matching	By MS/MS	By matching	By matching	By matching	By matching	By matching
ASGVPGRFSDSGSGTDFTLK	gi|15919717	1984.95	993.475	2	86.573	20	1	Unmodified	11828000	12244000	0	0	20247000	0	0	0	0	0	0	0	0	0	0	0	0	0	0	0	0	0	0	0	0	0	0	0	By MS/MS	By MS/MS	By matching	By matching	By MS/MS	By matching	By matching	By matching	By matching	By matching	By matching	By matching	By matching
ASGYMFTNYWIGWVR	gi|304562147	1849.86	925.931	2	86.944	15	0	Unmodified	0	0	0	0	0	0	0	0	0	0	0	0	0	0	0	0	0	0	0	0	0	1452800	0	0	0	0	0	0	By matching	By matching	By matching	By matching	By matching	By matching	By matching	By matching	By matching	By matching	By matching	By matching	By matching
ASGYSFSNYGISWVR	gi|91979756	1692.79	847.395	2	119.65	15	0	Unmodified	0	0	530880	224590	0	0	0	0	0	951870	480450	0	0	0	0	0	0	0	1202800	0	0	836740	0	0	0	0	0	0	By matching	By matching	By matching	By matching	By matching	By matching	By matching	By matching	By matching	By MS/MS	By matching	By matching	By matching
ASGYSFSSSGINWVR	gi|304562980	1616.76	809.379	2	120.9	15	0	Unmodified	0	0	0	1836100	0	0	0	0	0	0	0	525030	0	0	0	0	0	0	0	0	0	0	0	0	0	0	0	0	By matching	By matching	By matching	By MS/MS	By matching	By matching	By matching	By matching	By matching	By matching	By matching	By matching	By matching
ASGYSFTDYYLHWVR	gi|21311281	1863.86	932.929	2	121.45	15	0	Unmodified	0	0	0	0	0	0	0	0	0	0	0	0	0	2209900	0	0	0	0	0	0	0	0	0	0	0	0	0	0	By matching	By matching	By matching	By matching	By matching	By matching	By matching	By matching	By matching	By matching	By matching	By matching	By matching
ASGYSFTNYDINWVR	gi|10953924	1791.82	896.911	2	141.34	15	0	Unmodified	0	0	0	0	0	0	0	0	0	0	0	0	0	0	0	0	0	0	0	0	0	0	0	0	0	1061900	0	0	By matching	By matching	By matching	By matching	By matching	By matching	By matching	By matching	By matching	By matching	By matching	By matching	By matching
ASGYSFTSSWINWVR	gi|388778128	1759.83	880.916	2	71.558	15	0	Unmodified	0	0	0	0	0	0	0	0	0	0	0	0	0	0	0	0	0	0	431370	0	0	0	0	0	0	0	0	0	By matching	By matching	By matching	By matching	By matching	By matching	By matching	By matching	By matching	By matching	By matching	By matching	By matching
ASGYSFTSYGISWLR	gi|815069069	1693.81	847.905	2	196.18	15	0	Unmodified	0	0	0	0	0	0	0	0	0	0	2051700	0	0	0	0	0	0	0	0	0	0	0	0	0	0	0	0	0	By matching	By matching	By matching	By matching	By matching	By matching	By matching	By matching	By matching	By matching	By MS/MS	By matching	By matching
ASGYSFTSYGISWVR	gi|404249036	1679.79	840.897	2	109.1	15	0	Unmodified	0	186470	132820	0	0	0	362690	0	0	0	0	0	0	325170	134320	0	0	393210	0	0	0	0	0	629010	0	0	0	0	By matching	By matching	By matching	By matching	By matching	By matching	By matching	By matching	By matching	By matching	By matching	By matching	By matching
ASGYSLTSYNMHWVR	gi|304562461	1770.81	886.407	2	83.692	15	0	Unmodified	0	0	0	0	0	0	0	0	0	0	0	0	0	0	0	0	0	0	0	0	0	0	0	0	0	0	1903300	0	By matching	By matching	By matching	By matching	By matching	By matching	By matching	By matching	By matching	By matching	By matching	By matching	By matching
ASGYTFASYDINWVR	gi|110610131	1748.82	875.408	2	87.083	15	0	Unmodified	331980	478240	0	0	0	0	0	0	585170	227480	0	0	0	0	0	0	0	0	0	0	0	0	0	0	0	0	0	0	By matching	By MS/MS	By matching	By matching	By matching	By matching	By matching	By matching	By MS/MS	By matching	By matching	By matching	By matching
ASGYTFINYDINWVR	gi|815069520	1817.87	909.937	2	126.71	15	0	Unmodified	0	3532100	0	0	0	0	0	0	0	0	0	0	0	0	0	323950	0	0	0	0	0	0	0	282890	0	0	265690	0	By matching	By MS/MS	By matching	By matching	By matching	By matching	By matching	By matching	By matching	By matching	By matching	By matching	By matching
ASGYTFISYGISWVR	gi|39937997	1705.85	853.923	2	119.77	15	0	Unmodified	0	0	0	0	0	0	0	0	0	585820	0	0	0	0	0	0	0	0	0	0	0	0	0	0	0	0	0	0	By matching	By matching	By matching	By matching	By matching	By matching	By matching	By matching	By matching	By MS/MS	By matching	By matching	By matching
ASGYTFNSFSITWVR	gi|304563916	1734.84	868.418	2	111.66	15	0	Unmodified	0	0	0	0	0	0	0	0	0	0	0	0	0	0	1088300	0	0	0	0	0	0	0	0	0	0	0	0	0	By matching	By matching	By matching	By matching	By matching	By matching	By matching	By matching	By matching	By matching	By matching	By matching	By matching
ASGYTFR	gi|353253868	800.382	401.191	2	98.523	7	0	Unmodified	111520	63462	67745	0	124830	271530	191430	100010	323560	153550	82009	106560	104960	602700	103770	136490	62574	347390	94553	0	63472	179120	90060	73471	0	133310	72590	145800	By matching	By matching	By matching	By matching	By matching	By matching	By MS/MS	By matching	By matching	By matching	By matching	By matching	By matching
ASGYTFSDYNINWVR	gi|323432011	1791.82	896.911	2	79.652	15	0	Unmodified	0	0	0	0	0	0	0	0	0	159010	0	310380	0	0	0	0	0	0	0	0	0	0	0	0	0	0	366000	0	By matching	By matching	By matching	By matching	By matching	By matching	By matching	By matching	By matching	By matching	By matching	By matching	By matching
ASGYTFSDYYLHWVR	gi|254588249	1863.86	932.929	2	89.507	15	0	Unmodified	0	0	0	0	0	0	0	0	0	0	0	461900	0	3127800	0	0	465840	0	0	0	0	0	0	0	0	395730	0	190390	By matching	By matching	By matching	By matching	By matching	By matching	By matching	By matching	By matching	By matching	By matching	By MS/MS	By matching
ASGYTFSGYYIHWLR	gi|121944670	1819.87	607.623	3	69.03	15	0	Unmodified	644940	436450	0	0	533140	315010	0	0	0	0	0	293840	0	0	150670	0	0	0	0	0	0	160540	0	0	0	0	0	0	By MS/MS	By matching	By matching	By matching	By matching	By matching	By matching	By matching	By matching	By matching	By matching	By matching	By matching
ASGYTFSNYDINWVR	gi|304563378	1791.82	896.911	2	130.95	15	0	Unmodified	0	165500	0	0	154230	0	278590	0	0	363680	0	0	561500	0	0	240800	0	229780	731300	0	449210	0	0	248250	0	0	366000	0	By matching	By matching	By matching	By matching	By matching	By matching	By matching	By matching	By matching	By matching	By matching	By matching	By MS/MS
ASGYTFSNYGISWVR	gi|145942561	1706.81	854.403	2	138.73	15	0	Unmodified	552760	279720	898450	0	338870	615570	651660	0	365980	480230	466560	657560	297930	488720	937110	0	0	302670	0	317240	0	291320	406070	1155700	0	0	0	431620	By matching	By matching	By MS/MS	By matching	By matching	By matching	By matching	By matching	By matching	By MS/MS	By matching	By MS/MS	By matching
ASGYTFSNYGITWVR	gi|118405865	1720.82	861.41	2	168.45	15	0	Unmodified	0	0	3269000	2094100	0	0	0	0	230310	0	0	0	0	0	471920	0	0	0	0	0	0	0	0	0	0	0	0	210720	By matching	By matching	By MS/MS	By MS/MS	By matching	By matching	By matching	By matching	By matching	By matching	By matching	By matching	By matching
ASGYTFSSDGISWVR	gi|700653149	1631.76	816.879	2	163.99	15	0	Unmodified	0	0	0	10631000	0	0	0	172410	0	0	0	0	0	0	0	0	0	0	0	0	0	0	0	0	0	0	0	0	By matching	By matching	By matching	By MS/MS	By matching	By matching	By matching	By matching	By matching	By matching	By matching	By matching	By matching
ASGYTFSSFDINWVR	gi|304562083	1748.82	875.408	2	90.707	15	0	Unmodified	0	478240	0	0	0	0	0	0	0	0	0	0	0	0	0	0	572370	0	0	0	0	261110	0	0	0	0	0	0	By matching	By MS/MS	By matching	By matching	By matching	By matching	By matching	By matching	By matching	By matching	By matching	By matching	By matching
ASGYTFSSYDINWVR	gi|304562473	1764.81	883.405	2	138.73	15	0	Unmodified	0	202430	0	373390	0	0	252790	0	0	0	0	425020	448480	359050	0	0	520860	250320	667120	0	288340	0	0	99319	0	557240	0	0	By matching	By matching	By matching	By matching	By matching	By matching	By matching	By matching	By matching	By matching	By matching	By MS/MS	By MS/MS
ASGYTFSSYGITWVR	gi|113471976	1693.81	847.905	2	131.96	15	0	Unmodified	0	0	0	0	0	0	0	0	0	0	0	0	0	0	0	0	0	997720	0	0	0	0	0	0	0	0	0	0	By matching	By matching	By matching	By matching	By matching	By matching	By matching	By matching	By matching	By matching	By matching	By matching	By matching
ASGYTFSSYGLNWVR	gi|21669967	1706.81	854.403	2	90.707	15	0	Unmodified	0	0	0	0	0	0	0	0	0	0	0	0	0	0	0	0	0	0	0	0	0	291320	0	0	0	0	0	0	By matching	By matching	By matching	By matching	By matching	By matching	By matching	By matching	By matching	By matching	By matching	By matching	By matching
ASGYTFSSYGLSWVR	gi|51103447	1679.79	840.897	2	171.26	15	0	Unmodified	0	283690	1764800	181240	735160	508600	359760	237760	317940	329820	241980	423930	236340	490490	397570	1020400	353880	0	304850	0	0	0	0	0	0	189570	163700	559800	By matching	By matching	By MS/MS	By matching	By MS/MS	By matching	By matching	By matching	By matching	By matching	By matching	By MS/MS	By matching
ASGYTFSTYDINWVR	gi|29837086	1778.83	890.413	2	134.02	15	0	Unmodified	0	0	0	0	0	911050	0	0	0	0	0	496920	0	0	5743000	0	0	0	470190	0	0	242500	0	0	0	0	0	0	By matching	By matching	By matching	By matching	By matching	By MS/MS	By matching	By matching	By matching	By matching	By matching	By matching	By matching
ASGYTFTADYIHWVR	gi|815069295	1785.85	893.924	2	80.746	15	0	Unmodified	0	137300	0	0	0	0	0	0	0	260180	0	0	0	0	1040300	0	0	0	0	0	1192000	0	0	0	0	0	0	0	By matching	By matching	By matching	By matching	By matching	By matching	By matching	By matching	By matching	By matching	By matching	By matching	By matching
ASGYTFTDYDINWVR	gi|323432218	1806.82	904.411	2	107.74	15	0	Unmodified	0	0	0	0	419360	0	0	0	0	0	0	0	322360	0	318990	0	0	0	0	0	318000	0	0	0	0	0	0	0	By matching	By matching	By matching	By matching	By matching	By matching	By matching	By matching	By matching	By matching	By matching	By matching	By MS/MS
ASGYTFTDYGISWVR	gi|21668528	1721.8	861.902	2	133.48	15	0	Unmodified	437760	0	350230	161730	0	1464500	553350	0	0	273320	0	690000	376570	0	0	0	0	0	0	1400400	0	0	208310	431180	0	618330	0	0	By matching	By matching	By matching	By matching	By matching	By MS/MS	By matching	By matching	By matching	By matching	By matching	By matching	By matching
ASGYTFTDYYLHWVR	gi|116795024	1877.87	939.937	2	143.58	15	0	Unmodified	0	1654700	0	0	1934700	0	2010000	850910	417390	222040	1906700	914730	1709400	3052600	0	0	0	2150100	0	1817000	2293300	1401100	0	0	853200	1039400	611210	0	By matching	By matching	By matching	By matching	By matching	By matching	By MS/MS	By matching	By matching	By matching	By MS/MS	By matching	By MS/MS
ASGYTFTDYYVHWVR	gi|113471940	1863.86	932.929	2	147.52	15	0	Unmodified	0	0	0	0	0	0	237820	0	0	0	0	0	624170	4793300	0	0	409910	0	0	0	0	0	0	0	0	349180	0	0	By matching	By matching	By matching	By matching	By matching	By matching	By matching	By matching	By matching	By matching	By matching	By matching	By MS/MS
ASGYTFTGYYLHWVR	gi|145942310	1819.87	607.623	3	73.219	15	0	Unmodified	644940	0	0	0	0	0	0	0	0	0	0	0	326240	519380	196000	0	0	0	0	0	205320	0	0	172020	0	0	0	0	By MS/MS	By matching	By matching	By matching	By matching	By matching	By matching	By matching	By matching	By matching	By matching	By matching	By MS/MS
ASGYTFTNYAIHWVR	gi|392731	1784.86	893.432	2	122.78	15	0	Unmodified	439860	0	0	0	0	0	0	0	1007600	140270	0	0	0	0	0	0	0	0	0	0	0	0	0	124010	0	0	0	0	By matching	By matching	By matching	By matching	By matching	By matching	By matching	By matching	By MS/MS	By matching	By matching	By matching	By matching
ASGYTFTNYAMNWVR	gi|815085185	1779.8	890.902	2	88.78	15	0	Unmodified	0	0	0	0	0	0	0	0	0	0	0	0	0	0	0	0	0	0	523660	0	0	0	0	0	0	0	0	0	By matching	By matching	By matching	By matching	By matching	By matching	By matching	By matching	By matching	By matching	By matching	By matching	By matching
ASGYTFTNYDLNWVR	gi|21668674	1805.84	903.919	2	215.96	15	0	Unmodified	0	1100600	0	1295700	1547000	583200	602010	674740	0	363050	675540	609120	1050000	1187500	1777900	0	952790	755080	875240	0	3144500	605410	0	764650	257640	847820	393220	0	By matching	By MS/MS	By matching	By MS/MS	By MS/MS	By MS/MS	By MS/MS	By MS/MS	By matching	By MS/MS	By MS/MS	By MS/MS	By MS/MS
ASGYTFTNYGFSWVR	gi|49354839	1754.81	878.403	2	84.297	15	0	Unmodified	0	0	0	0	0	0	0	0	0	0	0	0	0	0	2096100	0	0	0	0	0	0	0	0	0	0	0	0	0	By matching	By matching	By matching	By matching	By matching	By matching	By matching	By matching	By matching	By matching	By matching	By matching	By matching
ASGYTFTNYGITWVR	gi|815061368	1734.84	868.418	2	252.52	15	0	Unmodified	0	328320	680020	24033000	0	0	328020	0	1913000	0	386210	309500	0	0	1088300	642550	0	0	0	368700	0	0	0	404560	0	0	0	0	By matching	By matching	By MS/MS	By MS/MS	By matching	By matching	By matching	By matching	By MS/MS	By matching	By MS/MS	By matching	By matching
ASGYTFTNYGLSWVR	gi|304562650	1720.82	861.41	2	230.57	15	0	Unmodified	499060	1767200	2006100	3800600	1240900	676890	1889000	1021300	1723600	2261900	2216500	1494700	1142300	2518000	740060	715250	617550	451700	834430	958480	1836300	1868100	811160	1075400	496630	1511500	684360	1252600	By matching	By MS/MS	By MS/MS	By matching	By MS/MS	By MS/MS	By MS/MS	By MS/MS	By MS/MS	By MS/MS	By MS/MS	By MS/MS	By MS/MS
ASGYTFTNYWIGWVR	gi|46254126	1819.87	607.623	3	74.987	15	0	Unmodified	0	0	0	0	0	0	764670	0	147230	0	302770	0	0	0	0	0	0	187470	0	0	0	187840	145790	0	0	433510	269610	0	By matching	By matching	By matching	By matching	By matching	By matching	By MS/MS	By matching	By matching	By matching	By matching	By matching	By matching
ASGYTFTNYYLHWVR	gi|74146468	1876.89	939.445	2	171.36	15	0	Unmodified	0	0	0	3903300	0	0	0	0	0	0	0	0	0	0	0	0	0	0	0	0	0	0	0	0	0	0	0	0	By matching	By matching	By matching	By MS/MS	By matching	By matching	By matching	By matching	By matching	By matching	By matching	By matching	By matching
ASGYTFTR	gi|381142168	901.429	451.715	2	106.68	8	0	Unmodified	0	528510	246940	231690	0	639070	0	0	0	0	229310	0	0	0	319420	0	0	0	315090	0	525500	0	0	0	0	0	107550	149470	By matching	By MS/MS	By matching	By matching	By matching	By MS/MS	By matching	By matching	By matching	By matching	By matching	By matching	By matching
ASGYTFTSNAISWVR	gi|21668838	1658.81	830.403	2	107.74	15	0	Unmodified	0	0	0	0	0	0	0	0	0	0	0	0	0	0	899670	0	0	0	0	0	0	0	0	0	0	0	0	0	By matching	By matching	By matching	By matching	By matching	By matching	By matching	By matching	By matching	By matching	By matching	By matching	By matching
ASGYTFTSSGISWVR	gi|14289074	1617.78	809.889	2	109.1	15	0	Unmodified	0	0	0	0	0	0	511970	0	0	0	0	0	0	0	0	0	0	115770	0	0	333260	0	0	0	0	407790	0	0	By matching	By matching	By matching	By matching	By matching	By matching	By MS/MS	By matching	By matching	By matching	By matching	By matching	By matching
ASGYTFTSYAINWVR	gi|4836322	1734.84	868.418	2	80.371	15	0	Unmodified	0	0	0	0	507070	294750	0	0	241670	0	0	0	0	295210	0	0	0	0	0	0	0	0	0	0	0	0	0	316810	By matching	By matching	By matching	By matching	By MS/MS	By matching	By matching	By matching	By matching	By matching	By matching	By matching	By matching
ASGYTFTSYAMQWVR	gi|13991465	1766.81	884.404	2	118.51	15	0	Oxidation (M)	0	571890	0	0	0	0	627980	0	0	0	0	0	0	0	0	0	0	0	0	0	0	0	0	0	0	0	0	0	By matching	By MS/MS	By matching	By matching	By matching	By matching	By MS/MS	By matching	By matching	By matching	By matching	By matching	By matching
ASGYTFTSYDIDWVR	gi|346121	1779.81	890.905	2	85.006	15	0	Unmodified	0	0	0	0	0	0	0	0	0	0	0	0	0	0	0	0	0	0	523660	0	0	0	0	0	0	0	0	0	By matching	By matching	By matching	By matching	By matching	By matching	By matching	By matching	By matching	By matching	By matching	By matching	By matching
ASGYTFTSYDLNWVR	gi|2344924	1778.83	890.413	2	202.25	15	0	Unmodified	637010	1506700	0	1366900	1166600	1115600	2259600	1401400	582580	705770	904110	922100	985890	3915800	5743000	397870	944680	777940	1074900	0	976510	894270	0	865300	275230	909840	4215100	376830	By MS/MS	By MS/MS	By matching	By MS/MS	By MS/MS	By MS/MS	By MS/MS	By MS/MS	By MS/MS	By MS/MS	By MS/MS	By MS/MS	By MS/MS
ASGYTFTSYEINWVR	gi|122892256	1792.84	897.421	2	106.14	15	0	Unmodified	0	0	0	0	631700	0	0	0	0	0	0	0	0	1322400	0	0	0	0	0	0	0	0	0	0	0	0	0	0	By matching	By matching	By matching	By matching	By MS/MS	By matching	By matching	By matching	By matching	By matching	By matching	By matching	By matching
ASGYTFTSYGLNWVR	gi|118405900	1720.82	861.41	2	155.14	15	0	Unmodified	0	1767200	0	0	0	0	0	0	0	0	2216500	0	0	0	0	0	0	0	0	0	0	0	0	1075400	496630	0	0	0	By matching	By MS/MS	By matching	By matching	By matching	By matching	By matching	By matching	By matching	By matching	By MS/MS	By matching	By matching
ASGYTFTSYGLSWVR	gi|114147626	1693.81	847.905	2	66.784	15	0	Unmodified	0	0	0	0	0	0	0	0	0	0	0	0	0	0	871600	0	0	0	0	0	0	0	0	0	0	0	0	0	By matching	By matching	By matching	By matching	By matching	By matching	By matching	By matching	By matching	By matching	By matching	By matching	By matching
ASGYTFTTYDINWVR	gi|815069394	1792.84	897.421	2	162.88	15	0	Unmodified	0	678830	0	0	631700	1527200	364430	570720	367670	0	335030	0	0	1322400	769930	0	0	882280	0	0	302340	0	0	521540	0	0	172380	0	By matching	By MS/MS	By matching	By matching	By MS/MS	By MS/MS	By MS/MS	By MS/MS	By matching	By matching	By matching	By matching	By matching
ASGYTFTTYGISWVR	gi|432139269	1707.83	854.913	2	69.261	15	0	Unmodified	0	0	0	0	0	0	0	0	0	0	0	0	0	1110000	0	0	0	0	0	0	0	0	0	0	0	0	0	0	By matching	By matching	By matching	By matching	By matching	By matching	By matching	By matching	By matching	By matching	By matching	By matching	By matching
ASGYTFTTYGVSWVR	gi|197115823	1693.81	847.905	2	81.448	15	0	Unmodified	144730	0	0	502010	0	0	0	0	0	0	0	0	0	0	0	0	0	0	0	0	0	0	0	0	0	0	0	0	By matching	By matching	By matching	By MS/MS	By matching	By matching	By matching	By matching	By matching	By matching	By matching	By matching	By matching
ASGYTYNSYGISWVR	gi|304561908	1722.8	862.4	2	93.348	15	0	Unmodified	0	0	0	0	0	0	0	0	0	0	0	0	0	0	0	1129300	0	0	0	0	0	0	0	0	0	0	0	0	By matching	By matching	By matching	By matching	By matching	By matching	By matching	By matching	By matching	By matching	By matching	By matching	By matching
ASGYTYSSHDINWVR	gi|270053316	1754.8	878.401	2	78.401	15	0	Unmodified	0	0	0	0	0	0	0	0	0	0	0	0	0	0	2096100	0	0	0	0	0	0	0	0	0	0	0	0	0	By matching	By matching	By matching	By matching	By matching	By matching	By matching	By matching	By matching	By matching	By matching	By matching	By matching
ASGYYTEAYYIHWVR	gi|371927600	1877.87	939.937	2	98.337	15	0	Unmodified	0	0	0	0	0	0	882280	0	0	0	0	0	0	0	0	0	0	0	0	0	0	0	0	0	0	0	0	0	By matching	By matching	By matching	By matching	By matching	By matching	By MS/MS	By matching	By matching	By matching	By matching	By matching	By matching
ASHSINNWLAWYQQK	gi|910277208	1844.9	923.448	2	90.689	15	0	Unmodified	0	0	0	1291800	0	0	0	0	0	0	0	0	0	0	0	0	0	0	0	0	0	0	0	0	0	0	0	0	By matching	By matching	By matching	By MS/MS	By matching	By matching	By matching	By matching	By matching	By matching	By matching	By matching	By matching
ASHSISTYLAWYQQK	gi|62720439	1781.87	891.937	2	148.96	15	0	Unmodified	0	0	0	0	0	0	0	0	0	0	0	0	0	0	634460	0	0	0	0	0	0	0	0	553880	274190	0	0	0	By matching	By matching	By matching	By matching	By matching	By matching	By matching	By matching	By matching	By matching	By matching	By matching	By matching
ASHSVSSNLAWYQQKPGQAPR	gi|18307292	2311.15	771.382	3	126.07	21	1	Unmodified	0	0	0	1249100	239660	0	211990	196440	279500	0	257850	311000	205350	235630	380900	0	143850	210790	0	0	0	0	144020	0	0	0	214570	169810	By matching	By matching	By matching	By MS/MS	By matching	By matching	By matching	By matching	By matching	By matching	By matching	By matching	By matching
ASILENGVPSR	gi|27368996	1141.61	571.805	2	100.09	11	0	Unmodified	0	0	0	0	0	0	0	0	0	0	0	0	0	0	0	0	0	0	0	0	43065	0	316250	0	0	0	0	0	By matching	By matching	By matching	By matching	By matching	By matching	By matching	By matching	By matching	By matching	By matching	By matching	By matching
ASISIDTSETQFSLK	gi|374433429	1625.81	813.907	2	219.95	15	0	Unmodified	0	0	0	0	0	0	0	0	0	0	0	0	0	0	0	0	0	2018300	0	0	0	0	0	0	0	0	0	0	By matching	By matching	By matching	By matching	By matching	By matching	By matching	By matching	By matching	By matching	By matching	By matching	By matching
ASIVQTGVPSR	gi|54781212	1113.61	557.807	2	80.69	11	0	Unmodified	0	0	0	0	0	0	0	0	0	0	0	0	0	0	0	0	0	0	0	1364400	0	0	0	0	0	0	0	0	By matching	By matching	By matching	By matching	By matching	By matching	By matching	By matching	By matching	By matching	By matching	By matching	By matching
ASLLESGVPSR	gi|1353814	1114.6	558.299	2	142.08	11	0	Unmodified	389410	276700	309190	0	746350	1111100	627410	264130	2035300	723330	481620	843000	1777600	1061400	433040	994050	503110	686640	611090	435360	445470	405640	313150	569560	442360	0	488290	382870	By MS/MS	By MS/MS	By matching	By matching	By MS/MS	By MS/MS	By MS/MS	By MS/MS	By MS/MS	By MS/MS	By MS/MS	By MS/MS	By MS/MS
ASNLESGVPSR	gi|58223266	1115.56	558.779	2	147.73	11	0	Unmodified	1011500	0	1342200	0	1515300	5489000	1465200	1203900	1975000	0	0	0	1937200	2059500	0	0	1351600	1279400	1776800	2096400	2399400	0	556470	934180	587900	0	0	0	By MS/MS	By MS/MS	By MS/MS	By matching	By MS/MS	By MS/MS	By MS/MS	By MS/MS	By MS/MS	By MS/MS	By MS/MS	By MS/MS	By MS/MS
ASNLETGVPSR	gi|118425772	1129.57	565.786	2	85.271	11	0	Unmodified	0	0	0	0	214550	210370	0	0	0	0	0	0	188140	420820	0	434640	0	162560	0	0	515130	0	76361	243480	0	73356	95173	0	By matching	By matching	By matching	By matching	By MS/MS	By matching	By matching	By matching	By matching	By matching	By matching	By matching	By matching
ASQDIISWLAWYQQKPGKAPK	gi|18307286	2414.27	805.758	3	71.637	21	2	Unmodified	0	0	0	0	576020	0	0	0	0	0	0	0	0	0	0	0	0	0	0	0	0	0	0	0	0	0	0	0	By matching	By matching	By matching	By matching	By MS/MS	By matching	By matching	By matching	By matching	By matching	By matching	By matching	By matching
ASQDIKSFLSWYQQK	gi|51247838	1827.92	914.958	2	107.69	15	1	Unmodified	983040	0	0	0	0	0	0	0	0	0	0	0	0	0	0	0	0	0	0	0	0	0	0	0	0	0	0	0	By MS/MS	By matching	By matching	By matching	By matching	By matching	By matching	By matching	By matching	By matching	By matching	By matching	By matching
ASQDISNYLAWFQQKPGK	gi|13529116	2080.04	1041.02	2	74.966	18	1	Unmodified	0	246780	0	0	899870	0	346920	0	0	0	0	0	0	0	0	0	0	0	0	0	0	0	0	0	0	0	0	2474900	By matching	By matching	By matching	By matching	By matching	By matching	By matching	By matching	By matching	By matching	By matching	By matching	By matching
ASQDISSWLAWYQQK	gi|130381795	1809.87	905.934	2	136.57	15	0	Unmodified	1213900	0	261590	286750	0	0	0	536280	283610	0	249020	0	255380	0	0	0	391110	512340	0	0	0	0	0	0	0	0	0	890560	By MS/MS	By matching	By matching	By matching	By matching	By matching	By matching	By MS/MS	By matching	By matching	By matching	By matching	By matching
ASQDISSWLAWYQQKPGK	gi|130381795	2092.04	1047.02	2	121.82	18	1	Unmodified	410670	413410	1085600	398480	1646200	0	465850	989800	662450	333410	1558100	520730	726510	1372400	1457200	0	1626300	344860	520600	1242500	1007800	676300	463030	389900	316860	0	543370	3931500	By matching	By matching	By MS/MS	By matching	By MS/MS	By matching	By matching	By matching	By MS/MS	By matching	By MS/MS	By matching	By matching
ASQDISSYLNWYQQK	gi|70798789	1829.86	915.929	2	122.97	15	0	Unmodified	0	0	0	0	0	0	0	0	0	0	0	0	0	0	0	0	0	0	0	0	0	0	0	0	0	919260	0	0	By matching	By matching	By matching	By matching	By matching	By matching	By matching	By matching	By matching	By matching	By matching	By matching	By matching
ASQDISTNLAWYQQK	gi|630868971	1751.85	876.924	2	138.21	15	0	Unmodified	0	0	0	0	0	0	0	0	0	0	0	0	0	0	0	0	0	0	0	906420	0	0	0	0	0	0	0	0	By matching	By matching	By matching	By matching	By matching	By matching	By matching	By matching	By matching	By matching	By matching	By matching	By matching
ASQDISTWLAWYQQR	gi|84798322	1851.89	926.945	2	200.76	15	0	Unmodified	0	0	0	0	0	0	0	0	0	0	0	0	0	0	0	0	0	0	0	0	0	0	0	1117200	0	0	0	0	By matching	By matching	By matching	By matching	By matching	By matching	By matching	By matching	By matching	By matching	By matching	By matching	By matching
ASQDITNSLAWYQQK	gi|33570300	1751.85	876.924	2	123.1	15	0	Unmodified	0	0	0	0	0	0	0	0	0	0	0	0	0	0	0	0	0	0	0	906420	0	0	0	0	0	0	0	0	By matching	By matching	By matching	By matching	By matching	By matching	By matching	By matching	By matching	By matching	By matching	By matching	By matching
ASQDIYNSLAWYQQK	gi|700652724	1813.86	907.932	2	82.651	15	0	Unmodified	0	0	0	0	300970	0	0	165020	0	0	0	195190	261030	0	167740	0	0	795130	0	0	0	0	0	0	0	0	0	0	By matching	By matching	By matching	By matching	By matching	By matching	By matching	By matching	By matching	By matching	By matching	By matching	By matching
ASQDVNTAVAWYQQK	gi|71042241	1707.82	854.911	2	119.62	15	0	Unmodified	0	0	0	0	0	0	0	0	0	0	0	0	0	0	0	0	0	0	0	0	0	0	0	1320500	0	0	0	0	By matching	By matching	By matching	By matching	By matching	By matching	By matching	By matching	By matching	By matching	By matching	By matching	By matching
ASQGIGTWLAWYQQK	gi|910277218	1735.87	868.934	2	159.12	15	0	Unmodified	0	0	0	0	642610	0	506840	0	0	0	0	0	0	0	0	0	0	0	0	0	0	0	0	0	0	0	0	0	By matching	By matching	By matching	By matching	By MS/MS	By matching	By MS/MS	By matching	By matching	By matching	By matching	By matching	By matching
ASQGINNYVAWYQQK	gi|353254566	1768.85	885.427	2	175.21	15	0	Unmodified	0	0	0	5146700	0	0	0	0	0	0	0	0	0	0	0	0	0	0	0	0	0	0	0	0	0	0	0	0	By matching	By matching	By matching	By MS/MS	By matching	By matching	By matching	By matching	By matching	By matching	By matching	By matching	By matching
ASQGINSYLAWYQQK	gi|323432868	1755.86	878.929	2	86.214	15	0	Unmodified	0	0	0	0	0	0	0	0	0	0	0	0	554320	792060	0	0	465850	0	0	0	0	0	0	121520	0	0	0	0	By matching	By matching	By matching	By matching	By matching	By matching	By matching	By matching	By matching	By matching	By matching	By matching	By MS/MS
ASQGIRDDLAWYQQK	gi|695942831	1777.87	889.937	2	102.97	15	1	Unmodified	0	375210	0	0	0	0	0	0	1088900	0	0	0	0	0	0	0	0	0	0	0	0	0	0	0	0	0	0	0	By matching	By MS/MS	By matching	By matching	By matching	By matching	By matching	By matching	By MS/MS	By matching	By matching	By matching	By matching
ASQGIRDELGWYQQK	gi|662564242	1777.87	889.937	2	101.43	15	1	Unmodified	0	375210	0	0	0	0	0	0	1088900	0	0	0	0	0	0	0	0	0	0	0	0	0	0	124500	0	0	0	0	By matching	By MS/MS	By matching	By matching	By matching	By matching	By matching	By matching	By MS/MS	By matching	By matching	By matching	By matching
ASQGISNNLAWFQQK	gi|70798612	1690.84	846.421	2	97.45	15	0	Unmodified	0	0	0	0	0	0	0	0	0	0	0	0	0	0	0	0	0	0	0	0	0	0	748680	0	0	0	0	0	By matching	By matching	By matching	By matching	By matching	By matching	By matching	By matching	By matching	By matching	By matching	By matching	By matching
ASQGISNWLAWYQQKPGK	gi|618855250	2061.04	688.014	3	70.47	18	1	Unmodified	0	271650	0	0	0	759350	0	584100	0	0	0	0	0	0	0	0	0	0	0	0	0	0	0	0	0	0	0	0	By matching	By matching	By matching	By matching	By matching	By MS/MS	By matching	By MS/MS	By matching	By matching	By matching	By matching	By matching
ASQGISNYLAWFQQK	gi|194173395	1739.86	870.932	2	125.97	15	0	Unmodified	0	275390	0	0	447650	133640	0	141150	381600	0	199720	198410	331460	402350	168110	0	312090	334490	0	0	0	0	0	206000	103790	282430	0	0	By matching	By MS/MS	By matching	By matching	By MS/MS	By matching	By matching	By matching	By MS/MS	By matching	By matching	By matching	By MS/MS
ASQGISNYLAWFQQKPGK	gi|194173395	2022.03	675.011	3	68.978	18	1	Unmodified	0	627370	0	0	843430	586290	0	387420	962710	365960	517800	680170	766700	1109000	441580	0	769320	0	0	0	0	731680	0	302820	0	0	0	0	By matching	By MS/MS	By matching	By matching	By MS/MS	By matching	By matching	By matching	By MS/MS	By matching	By matching	By matching	By MS/MS
ASQGISSWLAWYQQK	gi|820957471	1751.86	876.932	2	144.8	15	0	Unmodified	0	779360	257920	376510	507590	213020	372780	199430	0	236810	441420	0	231550	878280	0	258870	0	422310	0	170590	216090	314550	0	0	0	231610	0	203200	By matching	By MS/MS	By matching	By matching	By MS/MS	By matching	By matching	By MS/MS	By matching	By matching	By MS/MS	By matching	By MS/MS
ASQGISSWLAWYQQKPGK	gi|820957471	2034.03	1018.02	2	133.9	18	1	Unmodified	0	4844300	1297000	530860	1389600	574480	826820	1144300	324840	863850	2029800	782090	1684900	1639300	0	558190	1596000	1828000	0	1467800	1962500	523280	0	537690	0	1873000	265330	1508800	By matching	By MS/MS	By MS/MS	By matching	By matching	By matching	By matching	By MS/MS	By matching	By MS/MS	By MS/MS	By matching	By MS/MS
ASQGISSWLAWYQQKPGKAPK	gi|820957471	2330.22	777.739	3	93.812	21	2	Unmodified	0	395770	151190	199500	2226000	504950	556760	730180	331170	633220	1126800	394610	719610	791970	435340	0	411540	0	0	0	393690	385620	0	0	0	0	0	0	By matching	By matching	By matching	By matching	By MS/MS	By matching	By matching	By matching	By matching	By matching	By matching	By matching	By matching
ASQGISSYLAWYQQK	gi|5360679	1728.85	865.424	2	115.1	15	0	Unmodified	0	0	0	0	602780	0	389040	0	0	162520	0	187970	440450	0	266690	0	317060	0	0	582120	0	0	0	203470	0	0	190180	0	By matching	By matching	By matching	By matching	By matching	By matching	By matching	By matching	By matching	By matching	By matching	By matching	By matching
ASQGISSYLAWYQQKPGK	gi|5360679	2011.02	671.339	3	52.569	18	1	Unmodified	0	0	0	0	0	0	0	0	818060	387130	0	0	0	0	0	0	0	0	0	0	0	0	326990	0	343210	0	187210	0	By matching	By matching	By matching	By matching	By matching	By matching	By matching	By matching	By MS/MS	By matching	By matching	By matching	By matching
ASQGISSYLAWYQQKPGKAPK	gi|5360679	2307.2	770.067	3	67.418	21	2	Unmodified	0	0	0	0	1821500	0	0	0	0	0	0	342250	0	0	0	0	0	0	0	0	0	0	244170	0	0	0	0	0	By matching	By matching	By matching	By matching	By MS/MS	By matching	By matching	By matching	By matching	By matching	By matching	By matching	By matching
ASQGISTWLAWYQQKPGK	gi|662564038	2048.05	683.683	3	74.783	18	1	Unmodified	0	255000	278780	0	276400	340550	0	0	408250	0	742530	527830	0	1438000	0	0	0	0	0	0	0	0	0	0	167780	0	0	0	By matching	By matching	By matching	By matching	By matching	By matching	By matching	By matching	By matching	By matching	By MS/MS	By matching	By matching
ASQGITTYLNWYQQK	gi|353254432	1799.88	900.942	2	98.654	15	0	Unmodified	0	0	0	0	0	0	0	0	0	0	0	0	0	1020700	0	0	0	0	0	0	0	0	0	0	0	0	0	0	By matching	By matching	By matching	By matching	By matching	By matching	By matching	By matching	By matching	By matching	By matching	By matching	By matching
ASQGLNNYLAWYQQK	gi|630868925	1782.87	892.434	2	127.78	15	0	Unmodified	0	0	0	795150	0	0	0	0	0	0	0	0	0	0	0	0	0	0	0	0	0	0	0	0	0	0	0	0	By matching	By matching	By matching	By MS/MS	By matching	By matching	By matching	By matching	By matching	By matching	By matching	By matching	By matching
ASQGLSNYLAWYQQK	gi|4378308	1755.86	878.929	2	146.59	15	0	Unmodified	427520	668280	271520	0	817620	677840	543100	283320	1076400	0	0	488420	0	0	0	0	0	452060	0	0	391070	308920	0	175240	0	539010	441290	0	By matching	By MS/MS	By matching	By matching	By matching	By matching	By matching	By matching	By MS/MS	By matching	By matching	By matching	By matching
ASQGVGSDYLAWYQQKPGQAPR	gi|70797821	2406.17	1204.09	2	116.73	22	1	Unmodified	0	0	0	0	0	0	0	0	0	0	0	0	0	2974400	0	0	0	0	0	0	0	0	0	0	0	0	0	0	By matching	By matching	By matching	By matching	By matching	By matching	By matching	By matching	By matching	By matching	By matching	By matching	By matching
ASQGVSNYITWYQQK	gi|98956292	1771.85	886.926	2	199.38	15	0	Unmodified	0	0	0	0	0	0	0	0	0	0	0	0	0	0	1834800	0	0	0	0	0	0	0	0	0	0	0	0	0	By matching	By matching	By matching	By matching	By matching	By matching	By matching	By matching	By matching	By matching	By matching	By matching	By matching
ASQGVSSNLAWYQQK	gi|306974	1665.81	833.906	2	99.927	15	0	Unmodified	0	0	0	0	0	0	0	0	0	0	0	0	0	0	0	0	902110	0	0	0	0	0	0	0	0	0	0	0	By matching	By matching	By matching	By matching	By matching	By matching	By matching	By matching	By matching	By matching	By matching	By matching	By matching
ASQGVSSNLAWYQQKPGQAPR	gi|306974	2272.13	758.378	3	98.572	21	1	Unmodified	0	0	0	0	0	0	0	1148500	0	870680	0	0	0	0	0	0	0	0	0	0	0	0	0	0	0	0	0	0	By matching	By matching	By matching	By matching	By matching	By matching	By matching	By MS/MS	By matching	By matching	By matching	By matching	By matching
ASQIVSSSYLAWYQQKPGQAPR	gi|58223234	2464.25	822.417	3	194.67	22	1	Unmodified	0	0	0	0	0	0	1799300	0	0	0	0	0	0	0	0	0	0	0	0	0	0	0	0	0	0	0	0	0	By matching	By matching	By matching	By matching	By matching	By matching	By MS/MS	By matching	By matching	By matching	By matching	By matching	By matching
ASQNIDSWLAWYQQKPGK	gi|15722903	2119.05	1060.52	2	97.129	18	1	Unmodified	910990	332050	1364500	1074300	2401800	410490	390110	351400	604770	303170	317690	340930	446800	737760	871350	387110	0	0	0	879530	0	0	0	0	139040	0	0	0	By matching	By matching	By matching	By MS/MS	By MS/MS	By matching	By matching	By matching	By matching	By matching	By matching	By matching	By matching
ASQNIDTWLAWYQQKPGK	gi|84798272	2133.06	712.021	3	69.331	18	1	Unmodified	0	0	0	813050	0	0	0	0	0	0	0	0	0	0	0	487080	0	0	0	0	0	1069600	0	233140	0	0	0	0	By matching	By matching	By matching	By MS/MS	By matching	By matching	By matching	By matching	By matching	By matching	By matching	By matching	By matching
ASQNINNALAWYQQK	gi|237702244	1747.86	874.932	2	93.649	15	0	Unmodified	0	0	0	0	0	0	0	0	0	0	0	0	0	0	0	0	0	0	3168500	0	0	0	0	0	0	0	0	0	By matching	By matching	By matching	By matching	By matching	By matching	By matching	By matching	By matching	By matching	By matching	By matching	By matching
ASQNINNYLNWYQQKPGEAPK	gi|567148	2462.2	821.733	3	60.764	21	1	Unmodified	0	0	0	1746200	0	0	0	0	0	0	0	0	0	0	0	0	0	0	0	0	0	0	0	0	0	0	0	0	By matching	By matching	By matching	By MS/MS	By matching	By matching	By matching	By matching	By matching	By matching	By matching	By matching	By matching
ASQNINYWLAWYQQK	gi|54781212	1911.93	956.963	2	116.51	15	0	Unmodified	0	0	0	1224200	0	0	0	0	0	0	0	0	0	0	0	0	0	0	0	0	0	0	0	0	0	0	0	0	By matching	By matching	By matching	By MS/MS	By matching	By matching	By matching	By matching	By matching	By matching	By matching	By matching	By matching
ASQNINYWLAWYQQKPGK	gi|54781212	2194.1	1098.05	2	157.07	18	1	Unmodified	0	0	0	2543700	0	0	0	0	0	0	0	0	0	0	0	0	0	0	0	0	0	0	0	0	0	0	0	0	By matching	By matching	By matching	By MS/MS	By matching	By matching	By matching	By matching	By matching	By matching	By matching	By matching	By matching
ASQNLNSWLAWYQQK	gi|414080253	1835.9	918.948	2	89.624	15	0	Unmodified	0	0	0	0	0	0	0	0	0	0	0	0	0	0	0	0	0	268950	0	0	0	0	0	0	0	0	0	0	By matching	By matching	By matching	By matching	By matching	By matching	By matching	By matching	By matching	By matching	By matching	By matching	By matching
ASQNVGTPVAWYQQK	gi|5542537	1675.83	838.916	2	78.401	15	0	Unmodified	0	0	0	0	0	0	0	0	0	1394000	0	0	0	0	0	0	0	0	0	0	0	0	0	0	0	0	0	0	By matching	By matching	By matching	By matching	By matching	By matching	By matching	By matching	By matching	By MS/MS	By matching	By matching	By matching
ASQPISTYLNWYQQK	gi|353255600	1825.9	913.95	2	176.56	15	0	Unmodified	0	0	0	0	0	0	0	0	0	0	0	0	0	0	0	0	0	1838600	0	0	0	0	0	0	0	0	0	0	By matching	By matching	By matching	By matching	By matching	By matching	By matching	By matching	By matching	By matching	By matching	By matching	By matching
ASQSIAGYLNWYQQKPGK	gi|70798915	2038.03	1020.01	2	125.41	18	1	Unmodified	0	0	0	0	0	0	0	0	0	0	0	0	0	0	0	0	0	0	0	0	0	0	0	0	908090	0	0	0	By matching	By matching	By matching	By matching	By matching	By matching	By matching	By matching	By matching	By matching	By matching	By matching	By matching
ASQSIAGYLNWYQQR	gi|758599	1783.86	892.932	2	177.38	15	0	Unmodified	0	0	0	0	0	0	0	0	0	0	0	0	0	0	0	0	0	1192500	0	0	0	0	0	0	0	0	0	0	By matching	By matching	By matching	By matching	By matching	By matching	By matching	By matching	By matching	By matching	By matching	By matching	By matching
ASQSIAGYLNWYQQRPGK	gi|758599	2066.03	1034.02	2	115.38	18	1	Unmodified	0	0	0	0	0	0	0	0	0	0	0	0	0	0	0	0	0	1761800	0	0	0	0	0	0	0	0	0	0	By matching	By matching	By matching	By matching	By matching	By matching	By matching	By matching	By matching	By matching	By matching	By matching	By matching
ASQSIDKYLNWYQQK	gi|77379542	1870.92	936.461	2	92.151	15	1	Unmodified	0	0	0	0	0	0	0	0	0	0	0	0	0	0	0	0	0	0	0	581370	0	0	0	0	0	0	0	0	By matching	By matching	By matching	By matching	By matching	By matching	By matching	By matching	By matching	By matching	By matching	By matching	By matching
ASQSIDNWLAWYQQKPGK	gi|388775923	2119.05	707.35	3	78.326	18	1	Unmodified	0	0	0	0	0	0	0	0	985110	0	604590	0	219170	0	0	707510	0	371530	0	0	287680	294010	222920	483880	217620	0	159550	0	By matching	By matching	By matching	By matching	By matching	By matching	By matching	By matching	By MS/MS	By matching	By matching	By matching	By matching
ASQSIDSSALAWYQQKPGQAPR	gi|353255478	2388.18	797.061	3	58.848	22	1	Unmodified	0	0	0	0	0	0	0	1199600	0	0	0	0	0	0	0	0	0	0	0	0	0	0	0	0	0	0	0	0	By matching	By matching	By matching	By matching	By matching	By matching	By matching	By MS/MS	By matching	By matching	By matching	By matching	By matching
ASQSIFNYLNWYQQK	gi|75707463	1888.91	945.455	2	124.42	15	0	Unmodified	0	0	0	0	0	0	0	0	0	0	0	0	0	0	758090	0	0	0	0	0	0	0	0	0	0	0	0	0	By matching	By matching	By matching	By matching	By matching	By matching	By matching	By matching	By matching	By matching	By matching	By matching	By matching
ASQSIGNWLAWYQQKPGK	gi|353255386	2061.04	688.014	3	66.059	18	1	Unmodified	0	272760	131910	0	623560	0	285660	0	418670	361300	295260	0	0	376700	0	0	392830	205590	0	1282800	225280	0	0	0	0	0	0	0	By matching	By matching	By matching	By matching	By MS/MS	By matching	By matching	By matching	By matching	By matching	By matching	By matching	By matching
ASQSIGNYLNWYQQK	gi|24412755	1798.86	900.432	2	97.45	15	0	Unmodified	0	0	0	0	0	311250	0	0	0	197310	0	0	0	0	0	0	0	271810	1785900	0	0	357640	0	0	82775	0	0	0	By matching	By matching	By matching	By matching	By matching	By matching	By matching	By matching	By matching	By matching	By matching	By matching	By matching
ASQSIGSNIAWYQQKPGQAPR	gi|1322204	2286.15	1144.08	2	178.52	21	1	Unmodified	0	0	0	0	0	992040	0	0	0	0	0	0	0	0	6657200	0	0	0	295790	0	0	643760	0	0	0	0	0	0	By matching	By matching	By matching	By matching	By matching	By MS/MS	By matching	By matching	By matching	By matching	By matching	By matching	By matching
ASQSIGSNYVAWYQQK	gi|18041744	1828.87	915.437	2	67.326	16	0	Unmodified	914490	0	0	0	0	0	0	0	0	0	0	0	0	0	0	0	0	0	0	0	0	0	0	0	0	0	0	0	By MS/MS	By matching	By matching	By matching	By matching	By matching	By matching	By matching	By matching	By matching	By matching	By matching	By matching
ASQSIGSWLAWYQQK	gi|388776045	1751.86	876.932	2	154.13	15	0	Unmodified	230330	0	0	0	507590	0	454080	149550	0	0	0	0	0	0	0	0	0	0	0	0	0	0	167750	0	120380	0	0	0	By matching	By matching	By matching	By matching	By MS/MS	By matching	By MS/MS	By matching	By matching	By matching	By matching	By matching	By matching
ASQSIGSWLAWYQQKPGKAPK	gi|388776045	2330.22	583.554	4	37.85	21	2	Unmodified	0	0	0	0	0	0	0	0	0	239520	317610	0	422650	403550	0	0	196570	0	0	0	0	0	99100	0	0	0	0	0	By matching	By matching	By matching	By matching	By matching	By matching	By matching	By matching	By matching	By MS/MS	By matching	By matching	By matching
ASQSIGTYLNWYQQK	gi|481982	1785.87	893.934	2	185.32	15	0	Unmodified	0	0	0	0	0	0	0	0	1006200	0	0	356840	0	0	0	446270	0	0	0	0	0	0	0	0	166810	0	0	0	By matching	By matching	By matching	By matching	By matching	By matching	By matching	By matching	By MS/MS	By matching	By matching	By matching	By matching
ASQSINSDLAWYQQKPGQAPR	gi|51103397	2344.16	782.385	3	71.376	21	1	Unmodified	283830	161090	533970	0	211390	0	0	0	0	0	115830	0	0	0	222350	195240	0	0	0	159620	0	0	0	0	0	0	0	0	By matching	By matching	By MS/MS	By matching	By matching	By matching	By matching	By matching	By matching	By matching	By matching	By matching	By matching
ASQSINSFLSWYQQR	gi|700652734	1813.87	907.937	2	96.707	15	0	Unmodified	0	0	0	0	1018800	0	0	0	0	0	0	0	0	0	0	0	0	0	0	0	0	0	0	0	0	0	0	0	By matching	By matching	By matching	By matching	By MS/MS	By matching	By matching	By matching	By matching	By matching	By matching	By matching	By matching
ASQSINSWLAWYQQK	gi|910277216	1808.88	905.442	2	63.29	15	0	Unmodified	0	0	0	0	0	0	0	531180	0	0	0	0	0	0	0	0	0	0	0	0	0	0	0	0	0	0	0	0	By matching	By matching	By matching	By matching	By matching	By matching	By matching	By MS/MS	By matching	By matching	By matching	By matching	By matching
ASQSINSWLAWYQQKPGK	gi|910277216	2091.05	698.018	3	70.197	18	1	Unmodified	0	0	0	0	0	0	0	0	0	0	0	0	0	1598400	0	0	0	0	0	0	0	0	0	0	0	730370	290730	707980	By matching	By matching	By matching	By matching	By matching	By matching	By matching	By matching	By matching	By matching	By matching	By matching	By matching
ASQSINSYLAWYQQK	gi|695942440	1785.87	893.934	2	82.529	15	0	Unmodified	0	0	0	0	0	0	0	0	0	0	0	0	0	0	0	0	0	0	0	0	0	617240	0	0	0	0	0	0	By matching	By matching	By matching	By matching	By matching	By matching	By matching	By matching	By matching	By matching	By matching	By matching	By matching
ASQSINSYLAWYQQKPGQAPR	gi|19744560	2392.19	798.397	3	107.03	21	1	Unmodified	0	953090	0	0	0	0	0	1496400	0	0	0	0	0	0	0	0	0	0	0	0	0	3506300	0	0	0	0	0	0	By matching	By matching	By matching	By matching	By matching	By matching	By matching	By MS/MS	By matching	By matching	By matching	By matching	By matching
ASQSINSYLNWYQQK	gi|392997200	1828.87	915.437	2	123.76	15	0	Unmodified	0	0	0	0	0	0	0	501850	0	0	745200	688330	450320	1177700	624930	0	0	539590	591330	588110	396040	528430	0	0	0	577800	0	0	By matching	By matching	By matching	By matching	By matching	By matching	By matching	By MS/MS	By matching	By matching	By MS/MS	By MS/MS	By matching
ASQSINSYLNWYQQKPGK	gi|587328	2111.04	1056.52	2	118.31	18	1	Unmodified	802900	643920	1362300	464830	0	0	0	0	1620400	0	1036700	0	754070	0	0	932930	0	0	1463500	1932500	520020	0	0	878970	0	0	0	0	By matching	By matching	By MS/MS	By matching	By matching	By matching	By matching	By matching	By MS/MS	By matching	By MS/MS	By matching	By matching
ASQSINTWLAWYQQK	gi|125762	1822.9	912.45	2	73.415	15	0	Unmodified	0	0	0	0	0	0	0	0	0	0	0	0	0	0	0	0	462250	0	0	0	0	0	0	0	0	0	0	0	By matching	By matching	By matching	By matching	By matching	By matching	By matching	By matching	By matching	By matching	By matching	By matching	By matching
ASQSISDWLAWYQQK	gi|353254974	1809.87	905.934	2	127.32	15	0	Unmodified	1213900	0	0	0	0	0	0	536280	0	0	0	0	186660	0	0	244510	0	0	0	0	0	0	0	0	0	0	0	0	By MS/MS	By matching	By matching	By matching	By matching	By matching	By matching	By MS/MS	By matching	By matching	By matching	By MS/MS	By matching
ASQSISDWLAWYQQKPGK	gi|353254974	2092.04	1047.02	2	118.55	18	1	Unmodified	0	720290	0	0	1189100	425000	536760	320750	712310	0	0	358060	0	0	452880	399740	3020100	287200	0	0	732650	292140	0	742030	0	899290	0	7266400	By matching	By matching	By matching	By matching	By matching	By MS/MS	By MS/MS	By matching	By matching	By matching	By matching	By matching	By matching
ASQSISDYLNWYQQK	gi|4378304	1829.86	915.929	2	107.46	15	0	Unmodified	0	0	0	0	0	0	0	0	0	0	0	0	0	0	0	0	0	0	0	0	0	0	0	0	0	919260	0	0	By matching	By matching	By matching	By matching	By matching	By matching	By matching	By matching	By matching	By matching	By matching	By matching	By matching
ASQSISDYLNWYQQKPGK	gi|4378304	2112.03	705.009	3	45.438	18	1	Unmodified	0	0	397780	0	0	0	0	0	0	0	0	0	0	0	0	0	0	0	0	0	0	0	0	0	0	0	0	0	By matching	By matching	By MS/MS	By matching	By matching	By matching	By matching	By matching	By matching	By matching	By matching	By matching	By matching
ASQSISGYLNWYQQK	gi|21998811	1771.85	886.926	2	137.8	15	0	Unmodified	0	0	0	0	0	0	0	0	0	0	0	0	0	0	1834800	0	0	0	0	0	0	0	0	0	0	0	0	0	By matching	By matching	By matching	By matching	By matching	By matching	By matching	By matching	By matching	By matching	By matching	By matching	By matching
ASQSISNNLAWYQQKPGQAPR	gi|323433072	2343.17	782.057	3	108.25	21	1	Unmodified	426060	243550	510000	1707200	486580	476470	340480	376060	634090	0	522930	468850	580820	0	572360	293030	393760	0	545290	361260	0	0	0	656600	0	0	0	337290	By matching	By matching	By MS/MS	By MS/MS	By matching	By matching	By matching	By matching	By matching	By matching	By matching	By matching	By matching
ASQSISNTFLAWYQQK	gi|584461464	1870.92	936.461	2	82.651	16	0	Unmodified	0	0	0	0	0	0	0	0	0	0	0	0	0	0	0	0	0	0	0	581370	0	0	0	0	0	0	0	0	By matching	By matching	By matching	By matching	By matching	By matching	By matching	By matching	By matching	By matching	By matching	By matching	By matching
ASQSISNTFLAWYQQKPGQAPR	gi|584461464	2477.25	826.748	3	94.281	22	1	Unmodified	0	0	0	0	0	0	0	0	0	0	0	0	0	0	0	0	0	0	0	2855400	0	0	0	0	0	0	0	0	By matching	By matching	By matching	By matching	By matching	By matching	By matching	By matching	By matching	By matching	By matching	By matching	By matching
ASQSISNWLAWYQQK	gi|42543655	1808.88	905.442	2	90.476	15	0	Unmodified	499280	457500	345330	0	0	0	0	0	0	0	0	0	0	639240	0	0	0	0	0	0	513210	0	311390	0	0	0	0	0	By matching	By MS/MS	By matching	By matching	By matching	By matching	By matching	By matching	By matching	By matching	By matching	By matching	By matching
ASQSISNWLAWYQQKPGEAPK	gi|353255366	2388.19	797.062	3	73.953	21	1	Unmodified	0	0	0	0	0	0	0	1199600	0	0	0	0	0	0	0	0	0	0	0	0	0	0	0	0	0	0	0	0	By matching	By matching	By matching	By matching	By matching	By matching	By matching	By MS/MS	By matching	By matching	By matching	By matching	By matching
ASQSISNWLAWYQQKPGK	gi|315487930	2091.05	698.018	3	77.726	18	1	Unmodified	362870	989380	605830	544570	850950	627140	967480	1040500	2279200	345720	533680	908310	721430	1598400	797870	653540	656850	490900	402060	975070	737230	452130	335880	974770	287460	730370	0	0	By matching	By MS/MS	By matching	By matching	By MS/MS	By MS/MS	By MS/MS	By MS/MS	By MS/MS	By matching	By matching	By MS/MS	By MS/MS
ASQSISNYLAWYQQK	gi|323432829	1785.87	893.934	2	125.22	15	0	Unmodified	501480	352900	0	0	0	0	0	242450	300950	0	802480	0	0	0	0	0	0	0	0	0	0	617240	0	0	0	0	0	0	By matching	By matching	By matching	By matching	By matching	By matching	By matching	By matching	By matching	By matching	By MS/MS	By matching	By matching
ASQSISNYLAWYQQKPGQAPR	gi|323432829	2392.19	798.397	3	146.86	21	1	Unmodified	703670	394600	0	0	0	0	507220	523180	578360	0	714120	712930	0	724550	1024600	0	0	0	0	0	0	3506300	0	0	0	0	0	0	By MS/MS	By MS/MS	By matching	By matching	By matching	By matching	By matching	By MS/MS	By matching	By matching	By matching	By matching	By matching
ASQSISNYLNWYQQK	gi|298508414	1828.87	915.437	2	134.88	15	0	Unmodified	0	0	416390	1395300	819540	0	0	0	736100	0	0	0	500330	0	336400	313060	0	539590	0	0	0	528430	365410	0	155730	0	503790	0	By matching	By matching	By MS/MS	By MS/MS	By MS/MS	By matching	By matching	By matching	By MS/MS	By matching	By matching	By matching	By matching
ASQSISNYLNWYQQKPGK	gi|298508414	2111.04	1056.52	2	141.1	18	1	Unmodified	0	0	0	368450	2131500	1622300	1834000	1411000	3720700	3594500	2270200	1353800	452180	3140000	1161600	672280	4423800	408930	0	0	1076800	1928200	901410	469880	636180	1421900	2526700	1345300	By matching	By matching	By matching	By matching	By MS/MS	By MS/MS	By matching	By MS/MS	By MS/MS	By MS/MS	By MS/MS	By MS/MS	By matching
ASQSISSCLAWYQQKPGKAPK	gi|98956441	2334.18	779.06	3	97.081	21	2	Unmodified	0	0	0	0	0	0	0	0	0	0	0	0	0	0	0	0	0	0	0	0	0	0	0	0	2567100	0	0	0	By matching	By matching	By matching	By matching	By matching	By matching	By matching	By matching	By matching	By matching	By matching	By matching	By matching
ASQSISSDLAWYQQKPGQAPR	gi|77379577	2317.15	1159.57	2	131.48	21	1	Unmodified	630200	181890	157070	2800100	0	252090	1243900	439000	0	1374000	0	464410	160910	709460	187820	157330	0	98534	269950	259270	0	291570	128020	147950	129180	772380	0	0	By MS/MS	By matching	By matching	By MS/MS	By matching	By matching	By MS/MS	By matching	By matching	By MS/MS	By matching	By matching	By matching
ASQSISSNLAWYQQKPGQAPR	gi|630868809	2316.16	1159.08	2	152.94	21	1	Unmodified	1184700	1156600	1732300	229200	0	822980	1145700	560170	864220	649560	980310	787860	2430700	1222900	776620	460210	535930	413380	816910	1117300	802400	0	951070	439000	274830	0	532860	584320	By MS/MS	By MS/MS	By MS/MS	By matching	By matching	By MS/MS	By MS/MS	By MS/MS	By MS/MS	By MS/MS	By MS/MS	By MS/MS	By MS/MS
ASQSISSSLAWYQQR	gi|33570439	1710.83	856.416	2	141.85	15	0	Unmodified	0	0	0	0	0	0	0	0	0	0	0	0	0	0	0	0	0	0	0	0	1060100	0	0	0	0	0	146700	0	By matching	By matching	By matching	By matching	By matching	By matching	By matching	By matching	By matching	By matching	By matching	By matching	By matching
ASQSISSSLAWYQQRPGQAPR	gi|33570439	2317.16	773.385	3	131.18	21	1	Unmodified	0	0	0	0	593790	0	0	0	0	0	0	0	0	0	0	0	0	0	0	0	1413300	579570	0	0	0	0	0	0	By matching	By matching	By matching	By matching	By MS/MS	By matching	By matching	By matching	By matching	By matching	By matching	By matching	By matching
ASQSISSSYLVWYQQK	gi|662563918	1873.92	937.961	2	97.073	16	0	Unmodified	0	0	0	0	0	0	0	0	0	0	0	0	1459100	0	0	0	0	0	0	0	0	0	0	0	0	0	0	0	By matching	By matching	By matching	By matching	By matching	By matching	By matching	By matching	By matching	By matching	By matching	By matching	By MS/MS
ASQSISSWLAWYQQKPGNAPK	gi|695942136	2346.18	1174.09	2	162.82	21	1	Unmodified	0	0	0	0	0	0	0	0	0	6123600	0	0	0	0	1493200	0	0	0	0	0	0	0	0	0	0	0	0	0	By matching	By matching	By matching	By matching	By matching	By matching	By matching	By matching	By matching	By MS/MS	By matching	By matching	By matching
ASQSISSWLAWYQQR	gi|58223236	1809.88	905.94	2	128.95	15	0	Unmodified	0	0	0	0	0	0	0	0	0	0	0	0	0	0	0	0	0	0	0	0	0	0	0	0	642710	0	0	0	By matching	By matching	By matching	By matching	By matching	By matching	By matching	By matching	By matching	By matching	By matching	By matching	By matching
ASQSISSWLAWYQQRPGK	gi|58223236	2092.05	1047.02	2	96.773	18	1	Unmodified	0	476570	0	0	1114100	0	0	0	0	463840	839300	0	0	0	0	0	0	0	0	0	0	0	0	509560	546000	0	0	0	By matching	By matching	By matching	By matching	By MS/MS	By matching	By matching	By matching	By matching	By matching	By matching	By matching	By matching
ASQSISSWVAWYQQK	gi|353255616	1767.86	884.929	2	96.707	15	0	Unmodified	0	0	0	0	0	0	0	0	0	0	0	0	0	0	0	0	0	0	0	0	0	0	0	0	0	0	342280	0	By matching	By matching	By matching	By matching	By matching	By matching	By matching	By matching	By matching	By matching	By matching	By matching	By matching
ASQSISSYLNWYQQK	gi|4176418	1801.86	901.932	2	81.703	15	0	Unmodified	0	0	0	0	0	0	0	0	0	0	0	0	709180	0	0	0	0	0	0	0	0	0	0	0	0	0	0	0	By matching	By matching	By matching	By matching	By matching	By matching	By matching	By matching	By matching	By matching	By matching	By matching	By MS/MS
ASQSISSYLNWYQQKPGK	gi|4176418	2084.03	695.678	3	78.191	18	1	Unmodified	0	0	0	0	3227300	0	0	0	0	0	2410400	0	0	0	893370	0	1114800	0	0	1389100	0	0	0	0	326630	1176900	562790	1466600	By matching	By matching	By matching	By matching	By MS/MS	By matching	By matching	By matching	By matching	By matching	By MS/MS	By matching	By matching
ASQSISSYLNWYQQKPGKAPK	gi|4176418	2380.22	794.406	3	82.663	21	2	Unmodified	931340	979730	825470	0	1828700	1687700	2448700	1104600	1288400	1422900	1863700	1732000	1714500	3091100	913240	1120000	751290	481120	1006900	1358500	321790	0	719220	0	0	0	0	422650	By matching	By matching	By matching	By matching	By MS/MS	By MS/MS	By matching	By matching	By matching	By matching	By matching	By matching	By matching
ASQSISTFLNWYQQK	gi|47271316	1799.88	900.942	2	80.387	15	0	Unmodified	0	0	0	0	0	0	188850	0	0	0	0	0	0	1020700	0	406410	0	348050	0	0	0	0	0	0	0	0	0	0	By matching	By matching	By matching	By matching	By matching	By matching	By matching	By matching	By matching	By matching	By matching	By matching	By matching
ASQSISTNLAWYQQKPGQAPR	gi|388777464	2330.18	777.726	3	101.9	21	1	Unmodified	539140	121880	0	713910	363590	0	212270	131370	413640	281040	288480	570460	391650	219170	234400	398360	0	0	144350	432700	0	0	193890	400120	0	0	160120	327630	By matching	By matching	By matching	By MS/MS	By matching	By matching	By matching	By matching	By matching	By matching	By matching	By MS/MS	By matching
ASQSISTNYLAWYR	gi|353255620	1658.81	830.403	2	132.06	14	0	Unmodified	0	0	0	0	0	0	0	0	0	0	0	0	0	0	0	0	0	0	697100	0	0	0	0	0	0	0	0	0	By matching	By matching	By matching	By matching	By matching	By matching	By matching	By matching	By matching	By matching	By matching	By matching	By matching
ASQSISTWLAWYQQKPGK	gi|194173393	2078.06	1040.03	2	102.39	18	1	Unmodified	908340	1016600	513600	559040	994860	650800	4063400	658860	3972500	0	2898000	822620	2584500	1119400	0	804210	573710	0	0	1656700	1012100	502930	918730	1239600	0	1031300	0	0	By MS/MS	By MS/MS	By MS/MS	By matching	By MS/MS	By MS/MS	By MS/MS	By matching	By MS/MS	By matching	By MS/MS	By matching	By MS/MS
ASQSISTWLAWYQQKPGKAPK	gi|194173393	2374.24	792.414	3	83.404	21	2	Unmodified	509580	1101800	119160	0	1117600	1014400	3823900	356030	1101100	905470	0	865710	954040	1363800	0	371640	0	210060	0	619460	157680	193720	780530	0	0	313470	0	0	By matching	By matching	By matching	By matching	By matching	By matching	By MS/MS	By matching	By matching	By matching	By matching	By matching	By matching
ASQSISTWVAWYQQK	gi|47600791	1781.87	891.937	2	132.08	15	0	Unmodified	0	0	0	0	0	0	0	0	0	1310200	0	0	0	0	634460	836860	0	0	0	871110	0	0	0	0	0	0	0	0	By matching	By matching	By matching	By matching	By matching	By matching	By matching	By matching	By matching	By MS/MS	By matching	By matching	By matching
ASQSISTWVAWYQQKPGK	gi|47600791	2064.04	689.014	3	106.82	18	1	Unmodified	0	0	0	1488700	0	1805100	0	0	0	0	4005500	0	3295300	6247100	1530300	2165300	3886800	1616000	1786400	0	0	0	1419800	1725300	991410	0	1479600	0	By matching	By matching	By matching	By MS/MS	By matching	By MS/MS	By matching	By matching	By matching	By matching	By MS/MS	By matching	By MS/MS
ASQSISTWVAWYQQKPGKAPK	gi|47600791	2360.23	787.743	3	87.676	21	2	Unmodified	0	1981400	0	0	0	0	0	0	0	0	0	0	0	0	0	0	0	0	0	1263700	0	0	0	0	0	0	0	585360	By matching	By MS/MS	By matching	By matching	By matching	By matching	By matching	By matching	By matching	By matching	By matching	By matching	By matching
ASQSISTYLAWYQQKPGQAPR	gi|15722756	2379.2	1190.6	2	182.28	21	1	Unmodified	0	488840	0	6115800	0	0	179240	368720	699410	3613400	556440	618760	0	642420	0	0	0	0	0	662690	0	0	965640	0	0	0	0	0	By matching	By matching	By matching	By MS/MS	By matching	By matching	By matching	By matching	By matching	By MS/MS	By matching	By matching	By matching
ASQSISTYLNWYQK	gi|300498354	1687.82	844.91	2	126.71	14	0	Unmodified	333230	0	0	0	0	0	0	0	0	0	0	0	0	0	0	0	0	662720	0	0	0	0	0	0	0	0	0	0	By matching	By matching	By matching	By matching	By matching	By matching	By matching	By matching	By matching	By matching	By matching	By matching	By matching
ASQSISTYLNWYQQEPGKAPK	gi|4378306	2395.18	799.394	3	66.809	21	1	Unmodified	0	0	0	0	0	0	0	0	0	1504000	0	0	0	0	0	0	0	306970	0	0	0	0	0	0	0	0	0	0	By matching	By matching	By matching	By matching	By matching	By matching	By matching	By matching	By matching	By MS/MS	By matching	By matching	By matching
ASQSISTYLNWYQQK	gi|21669355	1815.88	908.94	2	204.52	15	0	Unmodified	772740	0	1515300	897960	0	2668100	0	0	0	1279100	0	1300700	0	2652900	0	0	1210400	2964100	717580	0	0	733640	0	0	0	0	0	0	By MS/MS	By matching	By MS/MS	By MS/MS	By matching	By MS/MS	By matching	By matching	By matching	By MS/MS	By matching	By MS/MS	By matching
ASQSISTYLNWYQQKPGK	gi|21669355	2098.05	1050.02	2	130.47	18	1	Unmodified	1039300	0	4250900	1117200	1056200	2731900	1154800	2915300	4621100	3922400	1744400	3364600	2616100	4847000	2254800	1190500	4454600	6246600	4057500	3791100	0	2757700	1516400	846690	408920	8919700	0	3681200	By matching	By matching	By MS/MS	By MS/MS	By matching	By MS/MS	By matching	By MS/MS	By MS/MS	By MS/MS	By MS/MS	By MS/MS	By matching
ASQSISTYLNWYQQKPGKAPK	gi|21669355	2394.23	799.078	3	78.441	21	2	Unmodified	357860	993270	2019300	0	433220	0	0	0	831690	0	807840	1051000	744240	1684300	585320	348750	0	324130	0	564400	0	519360	0	0	0	0	0	0	By matching	By matching	By MS/MS	By matching	By matching	By matching	By matching	By matching	By matching	By matching	By matching	By matching	By matching
ASQSISTYLSWYQQK	gi|4378192	1788.87	895.434	2	180.27	15	0	Unmodified	0	0	0	3568900	0	0	0	0	0	0	0	0	0	0	0	0	0	0	0	0	0	0	0	0	0	0	0	0	By matching	By matching	By matching	By MS/MS	By matching	By matching	By matching	By matching	By matching	By matching	By matching	By matching	By matching
ASQSITNYLNWYQQK	gi|21669291	1842.89	922.445	2	85.163	15	0	Unmodified	0	0	0	0	0	0	400920	0	0	0	0	0	0	0	0	0	0	0	0	0	0	0	0	0	0	0	0	0	By matching	By matching	By matching	By matching	By matching	By matching	By MS/MS	By matching	By matching	By matching	By matching	By matching	By matching
ASQSITSSLAWYQQKPGQAPR	gi|434696	2303.17	1152.58	2	111.09	21	1	Unmodified	822330	0	0	0	0	0	0	119650	0	0	0	0	0	0	0	0	0	0	0	3304100	0	0	5513600	0	0	0	0	235600	By MS/MS	By matching	By matching	By matching	By matching	By matching	By matching	By matching	By matching	By matching	By matching	By matching	By matching
ASQSITSWLAWYQQK	gi|33570601	1795.89	898.945	2	92.269	15	0	Unmodified	0	0	0	0	0	0	556510	0	0	0	0	0	429280	0	224310	0	322780	0	0	0	326480	0	0	0	0	0	129450	402750	By matching	By matching	By matching	By matching	By matching	By matching	By MS/MS	By matching	By matching	By matching	By matching	By matching	By MS/MS
ASQSITSWLAWYQQKPGK	gi|33570601	2078.06	1040.03	2	124.5	18	1	Unmodified	2167300	1463800	468410	590690	1137000	941370	1958700	585450	2112100	764680	0	731100	2584500	1577300	1354100	1224100	833260	1272000	677160	3120800	871870	514350	1080500	1191700	629520	1608600	877590	756550	By MS/MS	By matching	By matching	By matching	By MS/MS	By matching	By MS/MS	By matching	By MS/MS	By matching	By matching	By matching	By MS/MS
ASQSITSWLAWYQQKPGKAPK	gi|33570601	2374.24	594.561	4	35.133	21	2	Unmodified	0	0	0	0	0	0	1264800	0	0	0	0	0	0	0	0	0	0	0	0	0	0	0	0	0	0	0	0	0	By matching	By matching	By matching	By matching	By matching	By matching	By MS/MS	By matching	By matching	By matching	By matching	By matching	By matching
ASQSITSWVAWYQQK	gi|4323910	1781.87	891.937	2	92.939	15	0	Unmodified	0	0	0	0	0	0	1695900	0	0	0	0	0	0	0	0	0	0	0	0	0	0	0	0	0	0	0	0	0	By matching	By matching	By matching	By matching	By matching	By matching	By MS/MS	By matching	By matching	By matching	By matching	By matching	By matching
ASQSITSWVAWYQQKPGK	gi|4323910	2064.04	1033.02	2	109.1	18	1	Unmodified	0	0	0	0	0	2582100	0	0	0	1492700	0	0	0	0	0	0	4893900	0	0	0	0	0	0	0	0	0	0	0	By matching	By matching	By matching	By matching	By matching	By MS/MS	By matching	By matching	By matching	By MS/MS	By matching	By matching	By matching
ASQSITSYLNWYQQK	gi|4378384	1815.88	908.94	2	148.7	15	0	Unmodified	0	0	0	897960	0	0	0	0	885410	1279100	0	0	0	0	0	0	0	0	544490	0	0	733640	0	0	355290	0	0	0	By matching	By matching	By matching	By MS/MS	By matching	By matching	By matching	By matching	By matching	By MS/MS	By matching	By matching	By matching
ASQSITSYLNWYQQKPGK	gi|4378384	2098.05	1050.02	2	107.73	18	1	Unmodified	618400	805600	2116700	0	1128500	0	0	1162000	2162000	0	1116800	0	0	0	0	1190500	0	2881600	1519300	0	644840	1184100	0	0	0	0	0	1307200	By matching	By matching	By MS/MS	By matching	By MS/MS	By matching	By matching	By MS/MS	By MS/MS	By matching	By MS/MS	By matching	By matching
ASQSITSYLNWYQQKPGKAPK	gi|4378384	2394.23	799.078	3	78.441	21	2	Unmodified	0	0	0	0	0	1136600	1440500	471410	0	1230600	0	0	0	0	0	407360	867840	1023200	1376300	0	0	0	393330	0	0	688740	333620	486420	By matching	By matching	By matching	By matching	By matching	By MS/MS	By matching	By matching	By matching	By matching	By matching	By matching	By matching
ASQSIYSNLAWYQQK	gi|109693121	1785.87	893.934	2	91.845	15	0	Unmodified	0	0	0	0	0	0	0	0	0	0	568550	0	0	0	0	0	0	0	0	0	0	0	0	0	0	0	0	0	By matching	By matching	By matching	By matching	By matching	By matching	By matching	By matching	By matching	By matching	By MS/MS	By matching	By matching
ASQSLGDSLAWYQQKPGQAPR	gi|323433166	2287.13	1144.57	2	83.894	21	1	Unmodified	0	0	0	0	0	0	0	0	0	0	0	0	10257000	0	0	0	0	0	0	0	0	0	0	0	0	0	0	0	By matching	By matching	By matching	By matching	By matching	By matching	By matching	By matching	By matching	By matching	By matching	By matching	By MS/MS
ASQSLNGWLAWYQQKPGK	gi|98956356	2061.04	688.014	3	86.772	18	1	Unmodified	0	0	0	2865400	0	0	0	0	0	0	0	0	0	0	0	0	0	0	0	1282800	0	0	0	0	0	0	118690	365060	By matching	By matching	By matching	By MS/MS	By matching	By matching	By matching	By matching	By matching	By matching	By matching	By matching	By matching
ASQSLNNWLAWYQQKPGK	gi|11275310	2118.06	707.022	3	77.24	18	1	Unmodified	253080	195070	309770	0	274690	0	217000	0	312110	0	0	0	349250	0	0	0	0	245330	0	241850	0	1025500	0	419820	183340	434720	107150	0	By matching	By matching	By matching	By matching	By matching	By matching	By matching	By matching	By matching	By matching	By matching	By matching	By matching
ASQSLNSNLAWYQQK	gi|185935	1736.85	869.424	2	177.93	15	0	Unmodified	0	0	129460	746230	0	333570	0	0	0	0	0	0	0	0	0	0	0	0	0	0	0	0	59336	0	0	0	0	0	By matching	By matching	By matching	By MS/MS	By matching	By matching	By matching	By matching	By matching	By matching	By matching	By matching	By matching
ASQSLNSNLAWYQQKPGQAPR	gi|185935	2343.17	782.057	3	54.292	21	1	Unmodified	319760	207510	127420	0	0	0	83166	200530	0	0	0	541490	0	0	473820	0	130120	0	0	514690	0	207210	0	0	0	0	0	158500	By matching	By matching	By matching	By matching	By matching	By matching	By matching	By matching	By matching	By matching	By matching	By matching	By matching
ASQSLSSNYLAWYQQKPGQAPR	gi|18025580	2479.22	827.408	3	78.917	22	1	Unmodified	901500	304300	0	0	544750	230380	313410	215950	377370	0	0	0	0	1681100	299620	0	0	0	0	0	550220	0	0	0	0	0	0	0	By MS/MS	By matching	By matching	By matching	By matching	By matching	By matching	By matching	By matching	By matching	By matching	By matching	By matching
ASQSLSSSYLAWYQQKPGQAPR	gi|21619606	2452.21	818.404	3	147.6	22	1	Unmodified	0	0	582700	0	0	1833800	802770	292750	0	286490	430700	0	0	0	385560	0	1172000	0	0	0	507210	0	318700	583530	0	255310	0	0	By matching	By matching	By matching	By matching	By matching	By MS/MS	By matching	By matching	By matching	By matching	By matching	By matching	By matching
ASQSLSSSYLAWYQQKPGQTPR	gi|12655720	2482.22	1242.11	2	99.93	22	1	Unmodified	0	0	0	0	0	0	0	0	0	0	0	0	0	0	0	0	0	0	0	0	0	0	0	0	0	1431900	0	0	By matching	By matching	By matching	By matching	By matching	By matching	By matching	By matching	By matching	By matching	By matching	By matching	By matching
ASQSLSSTYLAWYQQKPGQAPR	gi|106601	2466.23	823.076	3	82.865	22	1	Unmodified	0	254730	0	1100700	0	358850	299870	579130	544700	0	0	404270	331870	0	0	0	646770	0	0	0	374910	0	236440	0	0	0	0	0	By matching	By matching	By matching	By matching	By matching	By matching	By matching	By MS/MS	By matching	By matching	By matching	By matching	By matching
ASQSLSSWLAWYQQK	gi|323433041	1781.87	891.937	2	183	15	0	Unmodified	1029200	1190500	671740	0	1618800	823130	1695900	1101600	919600	1310200	1672100	1550600	1269200	1864000	634460	836860	1502600	655280	634650	1357400	1070100	874290	383710	553880	0	1210100	467640	715050	By MS/MS	By MS/MS	By matching	By matching	By MS/MS	By MS/MS	By MS/MS	By MS/MS	By MS/MS	By MS/MS	By MS/MS	By MS/MS	By MS/MS
ASQSLSSWLAWYQQKPGK	gi|323433041	2064.04	1033.02	2	198.61	18	1	Unmodified	4501600	6224300	4948400	2893400	8251100	4387200	6685200	5777300	6817200	3378400	9821100	4852300	7558800	13659000	3189300	4230100	8780700	3334000	3271100	9266800	9548000	4756400	2962600	3631900	2042300	7856700	3246000	4444300	By MS/MS	By MS/MS	By MS/MS	By MS/MS	By MS/MS	By MS/MS	By MS/MS	By MS/MS	By MS/MS	By MS/MS	By MS/MS	By MS/MS	By MS/MS
ASQSLSSWLAWYQQKPGKAPK	gi|323433041	2360.23	787.743	3	113.88	21	2	Unmodified	1061600	2995300	1379300	1315300	3385700	2520300	4343400	2347300	2731500	1349300	1836100	2248200	3146100	4366200	1226800	1230800	2445400	977220	1225500	606120	1939600	987030	1345400	0	374130	1479100	833020	192120	By MS/MS	By MS/MS	By MS/MS	By matching	By MS/MS	By MS/MS	By MS/MS	By MS/MS	By MS/MS	By matching	By MS/MS	By matching	By MS/MS
ASQSLSSYLAWYQQKPGQAPR	gi|695943165	2365.18	1183.59	2	186.17	21	1	Unmodified	0	1173300	1005100	1865400	0	0	853850	2149000	835270	807070	446520	688190	505580	1417200	476540	420420	0	235540	0	4551700	0	3410200	622670	354710	0	527270	0	674900	By matching	By MS/MS	By matching	By MS/MS	By matching	By matching	By matching	By MS/MS	By matching	By matching	By matching	By matching	By matching
ASQSLSTWLAWYQQK	gi|414080247	1795.89	898.945	2	143.56	15	0	Unmodified	453670	454970	0	0	589410	523040	556510	193530	469420	416960	410030	248090	429280	757750	0	608470	0	535280	153390	518640	0	0	251360	0	0	381060	0	0	By matching	By matching	By matching	By matching	By matching	By MS/MS	By MS/MS	By matching	By matching	By MS/MS	By MS/MS	By matching	By MS/MS
ASQSLTSYLSWYQQK	gi|70798795	1788.87	895.434	2	85.469	15	0	Unmodified	0	0	0	0	0	0	0	0	0	0	0	0	0	0	0	0	0	0	0	0	0	0	306960	0	0	0	0	0	By matching	By matching	By matching	By matching	By matching	By matching	By matching	By matching	By matching	By matching	By matching	By matching	By matching
ASQSVASGYLAWYQQR	gi|585379724	1813.87	907.937	2	132.65	16	0	Unmodified	0	0	0	0	1018800	0	0	0	0	0	0	0	0	0	0	0	0	0	0	0	0	0	0	0	0	0	0	0	By matching	By matching	By matching	By matching	By MS/MS	By matching	By matching	By matching	By matching	By matching	By matching	By matching	By matching
ASQSVATNLAWYQQKPGQAPR	gi|630869039	2300.17	1151.08	2	100.02	21	1	Unmodified	0	0	0	0	0	0	0	0	0	2018700	0	0	0	0	0	0	0	0	0	0	0	0	0	0	0	0	0	0	By matching	By matching	By matching	By matching	By matching	By matching	By matching	By matching	By matching	By MS/MS	By matching	By matching	By matching
ASQSVDSNLAWYQQK	gi|404248842	1723.82	862.908	2	133.48	15	0	Unmodified	0	217210	0	0	229510	109120	0	0	0	0	178240	665540	184570	0	0	0	192470	0	220320	343430	0	0	0	0	0	0	0	0	By matching	By matching	By matching	By matching	By matching	By matching	By matching	By matching	By matching	By matching	By matching	By MS/MS	By matching
ASQSVDSNLAWYQQKPGQAPR	gi|404248842	2330.14	777.713	3	98.552	21	1	Unmodified	911600	0	812950	325140	788350	796320	406970	443000	0	509650	580650	1597900	0	0	0	308160	551050	648270	339570	0	282620	454230	0	0	236610	0	0	355970	By MS/MS	By matching	By matching	By matching	By matching	By MS/MS	By matching	By matching	By matching	By matching	By matching	By MS/MS	By matching
ASQSVDTWLAWYQQK	gi|5578782	1809.87	905.934	2	73.834	15	0	Unmodified	0	0	0	0	0	0	0	0	0	0	0	0	0	0	0	0	0	0	0	0	0	0	0	0	0	0	0	0	By matching	By matching	By matching	By matching	By matching	By matching	By matching	By matching	By matching	By matching	By matching	By MS/MS	By matching
ASQSVGGTYVAWYQQK	gi|70797865	1771.85	886.926	2	123.76	16	0	Unmodified	0	0	0	0	0	0	0	0	0	0	0	0	674850	0	0	0	0	0	0	0	0	735410	0	0	0	0	0	0	By matching	By matching	By matching	By matching	By matching	By matching	By matching	By matching	By matching	By matching	By matching	By matching	By MS/MS
ASQSVGGTYVAWYQQKPGQAPR	gi|70797865	2378.18	793.726	3	52.498	22	1	Unmodified	0	0	0	0	0	0	0	0	0	0	0	0	0	0	0	0	0	0	0	0	0	0	0	0	0	0	801130	0	By matching	By matching	By matching	By matching	By matching	By matching	By matching	By matching	By matching	By matching	By matching	By matching	By matching
ASQSVGNYLAWYQQKPGQAPR	gi|1419581	2348.17	783.722	3	59.733	21	1	Unmodified	869950	0	0	0	0	0	0	0	0	0	0	0	0	0	0	0	0	0	0	0	0	0	0	0	0	0	0	0	By MS/MS	By matching	By matching	By matching	By matching	By matching	By matching	By matching	By matching	By matching	By matching	By matching	By matching
ASQSVGSNLAWYQQK	gi|630869019	1665.81	833.906	2	198.16	15	0	Unmodified	409720	314400	317260	0	572310	351420	124090	254940	2721700	255230	331220	227570	0	551830	265250	235950	902110	360400	196130	280330	249020	174140	0	317650	215830	249910	159820	246210	By matching	By matching	By matching	By matching	By MS/MS	By matching	By matching	By matching	By MS/MS	By matching	By matching	By matching	By matching
ASQSVGSNLAWYQQKPGQAPR	gi|630869019	2272.13	1137.07	2	166.67	21	1	Unmodified	1174400	801850	1650900	1358100	3071700	401540	240840	1557200	2182300	468180	1764900	1738200	1715200	955020	1703700	0	1602400	399800	300670	385350	310900	233180	152330	363610	158880	462420	1088000	345840	By MS/MS	By matching	By MS/MS	By matching	By MS/MS	By matching	By matching	By MS/MS	By MS/MS	By matching	By MS/MS	By MS/MS	By MS/MS
ASQSVGSSLAWYQQKPGQAPR	gi|323432844	2245.12	1123.56	2	125.51	21	1	Unmodified	355450	0	0	0	357880	132300	152450	71467	1031800	162300	291430	259820	1450200	280440	1887400	388260	0	0	133400	0	146490	344600	80249	0	0	85371	528240	711160	By matching	By matching	By matching	By matching	By matching	By matching	By matching	By matching	By matching	By matching	By matching	By matching	By MS/MS
ASQSVGSSYLAWYQQKPGQAPR	gi|63102925	2408.19	1205.09	2	100.41	22	1	Unmodified	0	0	0	0	0	0	298210	375830	0	0	307080	0	1241000	0	0	0	0	0	0	1876600	0	0	0	0	0	0	0	0	By matching	By matching	By matching	By matching	By matching	By matching	By matching	By matching	By matching	By matching	By matching	By matching	By MS/MS
ASQSVGSYLAWYQQK	gi|184848	1714.83	858.416	2	225.09	15	0	Unmodified	0	0	0	2397700	0	0	0	927470	0	575850	406870	0	0	322760	0	0	239590	398510	0	0	505150	0	0	0	0	408160	330960	649110	By matching	By matching	By matching	By MS/MS	By matching	By matching	By matching	By MS/MS	By matching	By matching	By matching	By matching	By matching
ASQSVGSYLAWYQQKPGQAPR	gi|184848	2321.16	1161.58	2	183.88	21	1	Unmodified	804150	727950	1727700	0	530650	639690	946910	652130	631160	4141800	716060	2020100	341130	557550	966160	530830	0	685780	144180	373360	736530	407860	907420	675630	367170	0	732160	2471000	By matching	By matching	By MS/MS	By matching	By matching	By matching	By matching	By matching	By matching	By MS/MS	By matching	By MS/MS	By matching
ASQSVNNNYLAWYQQKPGQAPR	gi|84798352	2519.23	840.744	3	58.693	22	1	Unmodified	392570	213070	0	0	0	0	0	229950	1004800	0	0	0	0	0	0	0	0	0	0	0	0	0	0	0	0	0	0	0	By matching	By matching	By matching	By matching	By matching	By matching	By matching	By matching	By MS/MS	By matching	By matching	By matching	By matching
ASQSVNNYLAWYQEKPGQAPR	gi|388775776	2406.17	1204.09	2	116.09	21	1	Unmodified	0	0	315320	0	0	0	145270	0	0	0	0	0	0	8385800	0	0	0	0	0	0	0	0	0	0	0	0	0	0	By matching	By matching	By matching	By matching	By matching	By matching	By matching	By matching	By matching	By matching	By matching	By matching	By matching
ASQSVNNYLAWYQQKPGQAPR	gi|33569996	2405.19	802.729	3	70.802	21	1	Unmodified	0	0	0	0	0	149850	0	0	0	0	0	0	0	1994400	0	0	0	0	0	0	0	0	0	0	0	0	0	243970	By matching	By matching	By matching	By matching	By matching	By matching	By matching	By matching	By matching	By matching	By matching	By matching	By matching
ASQSVNSAYLAWYQQK	gi|98956284	1842.89	922.445	2	101.42	16	0	Unmodified	0	0	0	0	0	0	0	0	0	0	0	0	0	516850	0	0	0	314650	0	294070	0	0	0	243660	87918	0	0	0	By matching	By matching	By matching	By matching	By matching	By matching	By matching	By matching	By matching	By matching	By matching	By matching	By matching
ASQSVNSNLAWYQQK	gi|87906	1722.83	862.416	2	162.94	15	0	Unmodified	302750	238060	296720	200630	324420	236920	242170	184030	0	119160	207230	546630	361640	0	283130	226330	153910	0	223770	0	0	153000	0	244610	0	240700	0	224510	By matching	By matching	By matching	By matching	By matching	By matching	By matching	By matching	By matching	By matching	By matching	By MS/MS	By matching
ASQSVNSNLAWYQQKPGQAPR	gi|87906	2329.16	1165.58	2	166.36	21	1	Unmodified	1074800	1478800	870550	582720	2396400	2116900	1671800	712250	830000	469060	820200	1675100	1601900	874520	531530	759020	774500	188090	428120	483400	528980	482840	274890	1661600	385010	277970	314430	753400	By MS/MS	By MS/MS	By MS/MS	By matching	By MS/MS	By MS/MS	By MS/MS	By matching	By matching	By matching	By matching	By matching	By MS/MS
ASQSVNSNYLAWYQQK	gi|470448	1885.9	943.948	2	204.82	16	0	Unmodified	0	0	0	0	0	0	0	227710	1147100	0	0	0	402810	567970	0	0	475340	296660	543800	418360	374790	0	0	315180	273800	4497400	0	0	By matching	By matching	By matching	By matching	By matching	By matching	By matching	By matching	By MS/MS	By matching	By matching	By matching	By matching
ASQSVNSNYLAWYQQKPGQAPR	gi|470448	2492.22	831.74	3	119.68	22	1	Unmodified	531910	862540	280710	398430	379630	176910	272610	538640	2826700	410620	0	0	653240	1227800	597520	680730	0	554000	0	804180	2540300	613660	0	598750	161760	1350600	0	218820	By MS/MS	By MS/MS	By matching	By matching	By matching	By matching	By matching	By MS/MS	By MS/MS	By matching	By matching	By matching	By MS/MS
ASQSVNSSYLAWYQQK	gi|8777875	1858.88	930.442	2	162.7	16	0	Unmodified	1726700	1314300	0	0	2035800	964850	1100400	0	1516500	576980	0	0	0	0	0	930780	0	916120	0	0	0	1216100	0	1166700	0	2084600	0	1135100	By MS/MS	By MS/MS	By matching	By matching	By MS/MS	By MS/MS	By MS/MS	By matching	By MS/MS	By MS/MS	By matching	By matching	By matching
ASQSVNSSYLAWYQQKPGQAPR	gi|8777875	2465.21	1233.6	2	142.23	22	1	Unmodified	0	0	0	0	0	0	0	0	1746500	677970	0	849990	0	0	0	0	873280	504500	0	0	0	0	369020	316470	0	1566000	0	0	By matching	By matching	By matching	By matching	By matching	By matching	By matching	By matching	By MS/MS	By matching	By matching	By MS/MS	By matching
ASQSVNSYLAWYQQKPGQAPR	gi|695942500	2378.18	1190.09	2	144.4	21	1	Unmodified	0	978910	0	0	0	0	0	0	0	129060	1164200	0	0	1100500	0	0	0	0	0	0	0	0	0	0	201500	0	0	0	By matching	By MS/MS	By matching	By matching	By matching	By matching	By matching	By matching	By matching	By matching	By MS/MS	By matching	By matching
ASQSVNTNLAWYQHKPGQAPR	gi|470476	2352.17	1177.09	2	70.944	21	1	Unmodified	5863800	0	0	0	0	0	0	0	0	0	0	0	0	0	0	0	0	0	0	0	0	0	0	0	0	0	0	0	By MS/MS	By matching	By matching	By matching	By matching	By matching	By matching	By matching	By matching	By matching	By matching	By matching	By matching
ASQSVPNSYLAWYQQKPGQAPR	gi|388458874	2475.23	1238.61	2	96.561	22	1	Unmodified	0	0	0	0	0	0	0	0	0	0	0	0	0	1615100	0	0	0	0	0	0	0	0	0	0	0	0	0	0	By matching	By matching	By matching	By matching	By matching	By matching	By matching	By matching	By matching	By matching	By matching	By matching	By matching
ASQSVRSDYLAWYQQKPGQAPR	gi|58223328	2535.26	1268.63	2	101.92	22	2	Unmodified	0	0	0	0	0	0	0	0	0	0	0	0	0	0	965750	0	0	0	0	0	0	0	0	0	0	0	0	0	By matching	By matching	By matching	By matching	By matching	By matching	By matching	By matching	By matching	By matching	By matching	By matching	By matching
ASQSVSDNLAWYQQKPGQAPR	gi|695942460	2330.14	777.713	3	62.94	21	1	Unmodified	911600	0	0	0	0	0	0	0	0	0	0	0	0	0	0	0	0	0	0	0	0	0	0	0	0	0	0	0	By MS/MS	By matching	By matching	By matching	By matching	By matching	By matching	By matching	By matching	By matching	By matching	By matching	By matching
ASQSVSGDYLAWYQQKPGQAPR	gi|587348	2436.18	1219.09	2	142.97	22	1	Unmodified	0	0	0	0	0	0	0	0	0	0	0	0	1076600	0	0	0	0	0	0	0	0	0	0	0	0	580310	3190600	0	By matching	By matching	By matching	By matching	By matching	By matching	By matching	By matching	By matching	By matching	By matching	By matching	By MS/MS
ASQSVSGNLAWYQQK	gi|33569987	1665.81	833.906	2	158.31	15	0	Unmodified	0	0	0	0	0	0	0	0	2721700	0	0	0	0	0	0	0	902110	0	0	0	0	0	0	0	0	0	0	0	By matching	By matching	By matching	By matching	By matching	By matching	By matching	By matching	By MS/MS	By matching	By matching	By matching	By matching
ASQSVSGNLAWYQQKPGQAPR	gi|33569987	2272.13	1137.07	2	119.62	21	1	Unmodified	0	0	1239700	0	917440	770060	599050	1148500	0	494450	1205400	1238500	1146200	2160300	1143600	0	1111000	1058500	543630	869140	621370	819900	411500	1186000	257730	997970	1409400	658690	By matching	By matching	By MS/MS	By matching	By MS/MS	By matching	By matching	By MS/MS	By matching	By MS/MS	By MS/MS	By MS/MS	By MS/MS
ASQSVSGNYLAWYQQK	gi|106600	1828.87	915.437	2	124.5	16	0	Unmodified	1226500	539370	0	0	391290	595990	801580	0	545990	536810	0	601590	0	0	0	0	0	0	345670	0	552750	0	0	278250	0	0	0	0	By MS/MS	By matching	By matching	By matching	By matching	By matching	By matching	By matching	By matching	By matching	By matching	By MS/MS	By matching
ASQSVSGNYLAWYQQKPGQAPR	gi|106600	2435.2	812.733	3	90.422	22	1	Unmodified	241410	249510	230680	488750	0	134750	318790	0	1152500	0	315890	870860	404190	453540	0	283950	238520	439100	376640	203400	281860	246080	239660	0	413810	208690	239830	0	By matching	By matching	By matching	By matching	By matching	By matching	By matching	By matching	By MS/MS	By matching	By matching	By MS/MS	By matching
ASQSVSGSNLAWYQQK	gi|695942452	1752.84	877.422	2	87.519	16	0	Unmodified	0	0	0	0	0	0	0	0	0	0	0	0	0	0	0	0	0	0	0	0	0	383710	0	0	0	0	0	0	By matching	By matching	By matching	By matching	By matching	By matching	By matching	By matching	By matching	By matching	By matching	By matching	By matching
ASQSVSGSNLAWYQQKPR	gi|695942452	2006	669.666	3	50.376	18	1	Unmodified	0	0	0	0	0	475230	0	0	0	0	0	0	0	0	0	0	0	0	0	0	0	0	0	0	0	0	0	0	By matching	By matching	By matching	By matching	By matching	By MS/MS	By matching	By matching	By matching	By matching	By matching	By matching	By matching
ASQSVSGSYLAWYQQKPGQAPR	gi|75707207	2408.19	803.729	3	118.05	22	1	Unmodified	0	0	0	0	0	254370	425870	233420	0	360550	0	0	1241000	0	0	0	0	198240	0	290590	0	0	0	0	601050	482660	0	256150	By matching	By matching	By matching	By matching	By matching	By matching	By matching	By matching	By matching	By matching	By matching	By matching	By MS/MS
ASQSVSGSYLTWYQQKPGQAPR	gi|33569981	2438.2	813.733	3	82.01	22	1	Unmodified	0	443610	0	0	0	0	0	0	0	0	0	0	0	0	0	0	0	0	0	0	0	0	0	0	0	0	1723200	0	By matching	By MS/MS	By matching	By matching	By matching	By matching	By matching	By matching	By matching	By matching	By matching	By matching	By matching
ASQSVSGYLAWYQQK	gi|845520	1714.83	858.416	2	228.38	15	0	Unmodified	0	0	0	2564000	0	0	0	0	0	0	0	0	0	0	0	0	0	158920	0	1287100	0	0	0	0	0	0	169470	0	By matching	By matching	By matching	By MS/MS	By matching	By matching	By matching	By matching	By matching	By matching	By matching	By matching	By matching
ASQSVSGYLAWYQQKPGQAPR	gi|845520	2321.16	1161.58	2	152.66	21	1	Unmodified	0	0	0	272650	731310	539420	0	0	890420	1552400	756830	0	0	785490	0	0	398970	0	107710	1812000	722340	0	0	0	0	659900	0	1155300	By matching	By matching	By matching	By matching	By matching	By matching	By matching	By matching	By matching	By MS/MS	By MS/MS	By matching	By matching
ASQSVSNDLTWYQQK	gi|296863727	1753.83	877.914	2	135.81	15	0	Unmodified	0	0	0	0	0	0	0	0	0	0	0	0	0	0	0	0	2909700	0	0	0	0	0	0	0	0	0	0	0	By matching	By matching	By matching	By matching	By matching	By matching	By matching	By matching	By matching	By matching	By matching	By matching	By matching
ASQSVSNNLAWYQQK	gi|5419732	1722.83	862.416	2	134.37	15	0	Unmodified	0	0	0	0	0	0	0	0	0	0	0	546630	0	0	0	0	0	0	0	0	0	0	0	0	0	0	0	0	By matching	By matching	By matching	By matching	By matching	By matching	By matching	By matching	By matching	By matching	By matching	By MS/MS	By matching
ASQSVSNNLAWYQQKPGQAPR	gi|5419732	2329.16	1165.58	2	126.07	21	1	Unmodified	1150000	710250	1101300	598340	1243600	0	863950	1165400	1551200	312940	648440	0	3332900	1034000	289620	610080	730880	314830	0	606350	497780	478240	457300	0	0	724980	517340	1019700	By matching	By MS/MS	By MS/MS	By matching	By MS/MS	By matching	By MS/MS	By MS/MS	By MS/MS	By matching	By MS/MS	By matching	By MS/MS
ASQSVSNNLAWYQQKPGQPPR	gi|630869051	2355.17	786.057	3	98.552	21	1	Unmodified	0	0	0	0	103130	0	0	0	0	0	0	0	0	0	1362200	0	0	0	0	0	0	0	0	0	0	0	0	0	By matching	By matching	By matching	By matching	By matching	By matching	By matching	By matching	By matching	By matching	By matching	By matching	By matching
ASQSVSNNYLAWYQQK	gi|7438711	1885.9	943.948	2	184	16	0	Unmodified	0	0	0	0	0	0	0	0	1147100	0	0	0	0	0	0	0	0	0	0	0	0	0	0	0	0	4497400	0	0	By matching	By matching	By matching	By matching	By matching	By matching	By matching	By matching	By MS/MS	By matching	By matching	By matching	By matching
ASQSVSNNYLAWYQQKPGQAPR	gi|585379713	2492.22	1247.11	2	111.01	22	1	Unmodified	1397000	1048400	692120	302560	637410	801680	1078800	538640	3607100	187800	304360	1129400	1075900	1613300	183180	0	946700	202420	1515500	980030	205850	125060	804190	0	727220	1675100	145120	0	By MS/MS	By MS/MS	By MS/MS	By matching	By matching	By MS/MS	By MS/MS	By MS/MS	By MS/MS	By matching	By MS/MS	By matching	By MS/MS
ASQSVSNSFLAWYQQK	gi|125801	1842.89	922.445	2	110.57	16	0	Unmodified	0	0	0	6029100	0	0	0	0	0	0	0	0	0	0	0	0	0	0	0	0	0	0	0	0	0	0	0	0	By matching	By matching	By matching	By MS/MS	By matching	By matching	By matching	By matching	By matching	By matching	By matching	By matching	By matching
ASQSVSNSFLAWYQQKPGQAPR	gi|125801	2449.21	817.405	3	68.243	22	1	Unmodified	0	140400	0	0	0	0	1134600	440320	783870	228740	0	0	479050	676660	0	0	0	319900	540850	0	517750	0	0	0	0	0	0	203820	By matching	By matching	By matching	By matching	By matching	By matching	By MS/MS	By matching	By matching	By matching	By matching	By matching	By matching
ASQSVSNSLAWYQQK	gi|75707411	1695.82	848.911	2	212.24	15	0	Unmodified	1197100	0	0	1443400	0	0	1342500	0	0	791300	0	2088000	0	2961800	0	0	2297900	1113800	1232600	2661400	0	1275800	548890	0	733530	0	682840	0	By MS/MS	By matching	By matching	By MS/MS	By matching	By matching	By MS/MS	By matching	By matching	By MS/MS	By matching	By MS/MS	By matching
ASQSVSNSLAWYQQKPGQAPR	gi|77379573	2302.15	1152.07	2	176.49	21	1	Unmodified	2172400	0	0	0	4719800	4418600	0	0	0	1628300	5965400	3533500	0	0	0	0	0	0	0	0	0	0	0	1633700	1281900	6369300	0	0	By MS/MS	By matching	By matching	By matching	By MS/MS	By MS/MS	By matching	By matching	By matching	By MS/MS	By MS/MS	By MS/MS	By matching
ASQSVSNSYLAWYQQK	gi|223320	1858.88	930.442	2	186.08	16	0	Unmodified	0	1314300	1220400	0	2035800	964850	0	1248600	0	576980	0	243990	0	0	2078500	0	1404500	0	0	0	0	1216100	0	0	0	0	0	0	By matching	By MS/MS	By MS/MS	By matching	By MS/MS	By MS/MS	By matching	By MS/MS	By matching	By MS/MS	By matching	By matching	By matching
ASQSVSNSYLAWYQQKPGQAPR	gi|223320	2465.21	1233.6	2	146.67	22	1	Unmodified	0	0	0	0	2927800	891950	1188000	784570	0	0	4987400	2899900	2821400	1795900	4422400	568630	0	0	1918000	571940	0	3226000	0	1294100	0	0	0	2553000	By matching	By matching	By matching	By matching	By MS/MS	By MS/MS	By MS/MS	By MS/MS	By matching	By matching	By MS/MS	By MS/MS	By MS/MS
ASQSVSNTYLGWYQQK	gi|585379707	1858.88	930.442	2	83.633	16	0	Unmodified	729440	0	0	0	0	0	0	0	0	0	0	0	0	0	0	0	0	0	0	0	0	0	0	0	0	0	0	0	By MS/MS	By matching	By matching	By matching	By matching	By matching	By matching	By matching	By matching	By matching	By matching	By matching	By matching
ASQSVSNTYLGWYQQKPGQAPR	gi|585379707	2465.21	822.736	3	96.153	22	1	Unmodified	0	0	0	0	0	2287400	0	0	0	0	0	0	0	0	0	0	0	0	0	0	3908800	3226000	923740	0	0	0	0	0	By matching	By matching	By matching	By matching	By matching	By MS/MS	By matching	By matching	By matching	By matching	By matching	By matching	By matching
ASQSVSNWLAWYQQTPGKAPK	gi|58223166	2346.18	783.059	3	44.831	21	1	Unmodified	0	0	0	1330300	0	0	0	0	0	211220	0	0	0	0	0	0	0	0	0	0	0	0	0	0	0	0	0	0	By matching	By matching	By matching	By MS/MS	By matching	By matching	By matching	By matching	By matching	By matching	By matching	By matching	By matching
ASQSVSNYLAWYQQK	gi|4378272	1771.85	886.926	2	169.04	15	0	Unmodified	472300	601500	379880	264910	496080	415630	540570	0	0	0	846800	893430	0	0	0	0	0	706950	357350	0	0	735410	0	409350	0	791340	0	512650	By matching	By matching	By matching	By matching	By MS/MS	By matching	By MS/MS	By matching	By matching	By matching	By MS/MS	By MS/MS	By matching
ASQSVSNYLAWYQQKPGQAPR	gi|4378272	2378.18	1190.09	2	174.78	21	1	Unmodified	1288200	3256700	474010	0	1606500	1076500	1573300	1054700	2340200	1058200	2355500	2410300	1766700	1567500	336870	1185500	1396700	1416400	308710	1831400	1730500	2797800	1292100	306430	597500	1450700	0	1104300	By MS/MS	By MS/MS	By matching	By matching	By MS/MS	By matching	By MS/MS	By MS/MS	By MS/MS	By matching	By MS/MS	By MS/MS	By MS/MS
ASQSVSSAYLAWYQQK	gi|722460	1815.88	908.94	2	123.72	16	0	Unmodified	0	1388900	0	0	0	407780	0	0	0	122520	0	0	0	0	0	0	0	0	0	0	0	0	0	0	0	0	115780	0	By matching	By MS/MS	By matching	By matching	By matching	By matching	By matching	By matching	By matching	By matching	By matching	By matching	By matching
ASQSVSSDLAWYQQK	gi|323432857	1696.81	849.403	2	184.76	15	0	Unmodified	190940	190670	0	0	342870	333270	130730	176020	328510	211880	267900	319820	169470	477290	203390	337070	1109400	0	225630	243390	164210	0	0	228990	823020	0	0	154300	By matching	By matching	By matching	By matching	By matching	By matching	By matching	By matching	By matching	By matching	By matching	By matching	By matching
ASQSVSSDLAWYQQKPGQAPR	gi|323432857	2303.13	1152.56	2	139.38	21	1	Unmodified	1078000	1403300	1110200	1012300	1257200	1762000	1378900	932830	1645400	1231300	1459600	2810500	2046800	1648800	867150	719460	1365000	1255300	2080400	2720300	855800	1014100	889350	849970	4941700	974030	1469700	1524900	By MS/MS	By MS/MS	By matching	By matching	By matching	By MS/MS	By MS/MS	By matching	By matching	By MS/MS	By matching	By MS/MS	By matching
ASQSVSSDYLAWYQQKPGQAPR	gi|33688	2466.19	823.064	3	52.185	22	1	Unmodified	594790	0	0	0	225170	0	364760	0	428260	0	354900	0	0	453090	0	458160	0	0	340820	462920	265670	355790	0	0	352490	0	0	463320	By MS/MS	By matching	By matching	By matching	By matching	By matching	By matching	By matching	By matching	By matching	By matching	By matching	By matching
ASQSVSSEYLAWYQQK	gi|910277116	1873.88	937.942	2	103.76	16	0	Unmodified	0	0	0	0	0	0	0	0	3498200	0	0	0	0	0	0	0	0	0	0	0	0	0	0	0	0	0	0	0	By matching	By matching	By matching	By matching	By matching	By matching	By matching	By matching	By MS/MS	By matching	By matching	By matching	By matching
ASQSVSSFLAWYQQK	gi|353255628	1728.85	865.424	2	139.77	15	0	Unmodified	216760	0	0	1226400	0	326990	0	0	0	207860	0	0	0	0	0	0	0	0	0	0	595770	0	0	0	0	0	0	0	By matching	By matching	By matching	By MS/MS	By matching	By matching	By matching	By matching	By matching	By matching	By matching	By matching	By matching
ASQSVSSFLAWYQQKPGQAPR	gi|353255628	2335.17	1168.59	2	156.11	21	1	Unmodified	200360	366090	967450	4362000	498110	2929100	1263700	241290	396320	2095300	818970	876960	1221800	1470500	0	283660	696490	259960	0	425000	1944800	335070	0	305590	209300	0	0	0	By matching	By matching	By matching	By MS/MS	By matching	By MS/MS	By matching	By matching	By matching	By MS/MS	By matching	By matching	By matching
ASQSVSSGYLAWYQQKPGQAPR	gi|480920	2408.19	1205.09	2	72.383	22	1	Unmodified	499520	391350	601010	502060	937750	0	234200	129300	1133900	0	704530	386450	1866900	239110	927730	269470	0	0	604700	0	743140	0	512200	590980	295740	281240	702640	163790	By MS/MS	By matching	By matching	By matching	By matching	By matching	By matching	By matching	By matching	By matching	By matching	By matching	By MS/MS
ASQSVSSHLAWYQQKPGQAPR	gi|77379450	2325.16	776.054	3	158.92	21	1	Unmodified	215740	357900	683650	0	0	402070	0	297310	485310	0	0	0	794930	237960	934380	0	0	1842000	1459400	0	0	0	0	0	0	0	0	0	By matching	By matching	By matching	By matching	By matching	By matching	By matching	By matching	By matching	By matching	By matching	By matching	By matching
ASQSVSSNFLAWYQQK	gi|722468	1842.89	922.445	2	203.2	16	0	Unmodified	330090	0	0	6029100	492120	0	400920	0	0	0	0	0	0	0	0	0	0	0	0	505300	0	0	0	0	0	0	0	0	By matching	By matching	By matching	By MS/MS	By matching	By matching	By MS/MS	By matching	By matching	By matching	By matching	By matching	By matching
ASQSVSSNLAWYQQK	gi|284521128	1695.82	848.911	2	229.48	15	0	Unmodified	1197100	2530300	1322100	1443400	1808100	1933100	1342500	1628600	2463200	791300	1538600	2088000	2557900	2961800	1090800	834030	2297900	1113800	1232600	2661400	1278500	1275800	0	1697200	733530	1050000	682840	1283000	By MS/MS	By MS/MS	By MS/MS	By MS/MS	By MS/MS	By MS/MS	By MS/MS	By MS/MS	By MS/MS	By MS/MS	By MS/MS	By MS/MS	By MS/MS
ASQSVSSNLAWYQQKPGQAPR	gi|284521128	2302.15	1152.07	2	210.43	21	1	Unmodified	8042600	8681700	1835100	4314200	14422000	14548000	10632000	7013200	15010000	5606600	8905300	11231000	14357000	13758000	6529200	3898400	8572100	4447600	9169700	10155000	6622400	6191400	3495000	5777100	3787400	6369300	3741200	8205300	By MS/MS	By MS/MS	By MS/MS	By MS/MS	By MS/MS	By MS/MS	By MS/MS	By MS/MS	By MS/MS	By MS/MS	By MS/MS	By MS/MS	By MS/MS
ASQSVSSNLAWYQQKPGQTPR	gi|585379695	2332.16	778.385	3	79.489	21	1	Unmodified	138050	1787000	0	0	0	0	0	0	0	0	0	0	0	862740	0	0	0	0	0	0	0	0	0	0	0	0	0	0	By matching	By MS/MS	By matching	By matching	By matching	By matching	By matching	By matching	By matching	By matching	By matching	By matching	By matching
ASQSVSSNLAWYQQR	gi|237702286	1723.83	862.914	2	164.93	15	0	Unmodified	0	613880	219860	668260	229170	410680	299130	344720	274610	201510	0	0	325990	202530	225340	246560	290000	237050	119700	0	298250	0	0	373650	116350	0	300670	267970	By matching	By MS/MS	By matching	By MS/MS	By matching	By MS/MS	By matching	By MS/MS	By matching	By matching	By matching	By matching	By MS/MS
ASQSVSSNLAWYQQRPGQAPR	gi|237702286	2330.15	777.717	3	79.393	21	1	Unmodified	568360	241770	388400	610460	481170	1058500	416250	586310	549480	471240	371240	481990	508910	535890	493570	333190	0	234090	366260	360680	422820	229640	0	0	298330	282480	211000	353060	By matching	By matching	By matching	By matching	By matching	By MS/MS	By matching	By matching	By matching	By matching	By matching	By matching	By matching
ASQSVSSNLAWYQQTPGQAPR	gi|315487988	2275.1	1138.55	2	107.78	21	0	Unmodified	0	0	0	728100	0	0	0	0	0	0	0	0	121380	0	0	0	0	181300	0	0	0	0	0	0	170350	0	0	86824	By matching	By matching	By matching	By MS/MS	By matching	By matching	By matching	By matching	By matching	By matching	By matching	By matching	By matching
ASQSVSSNYLAWYQQK	gi|190613407	1858.88	930.442	2	190.86	16	0	Unmodified	1726700	1314300	1220400	1196100	2035800	964850	1100400	1248600	1516500	0	2332300	1485900	1318100	1791900	2078500	930780	1404500	916120	761680	553760	1485300	1216100	422300	1166700	0	2624700	61159	1135100	By MS/MS	By MS/MS	By MS/MS	By MS/MS	By MS/MS	By MS/MS	By MS/MS	By MS/MS	By MS/MS	By matching	By MS/MS	By MS/MS	By MS/MS
ASQSVSSNYLAWYQQKPGQAPR	gi|190613407	2465.21	1233.6	2	164.02	22	1	Unmodified	4242500	2936400	2691300	2334500	4197500	3179300	4060100	2676700	5936600	1404900	4987400	3867800	3847100	5511600	4422400	1416300	2548200	1224000	2726300	1480200	4967900	4331900	923740	1294100	3107100	5907400	1293700	2553000	By MS/MS	By MS/MS	By MS/MS	By MS/MS	By MS/MS	By MS/MS	By MS/MS	By MS/MS	By MS/MS	By MS/MS	By MS/MS	By MS/MS	By MS/MS
ASQSVSSSFFAWYQQKPGQAPR	gi|761232723	2456.19	819.729	3	70.837	22	1	Unmodified	0	0	0	0	0	0	0	0	0	0	0	0	0	0	0	0	0	0	0	0	0	0	461430	0	0	0	0	0	By matching	By matching	By matching	By matching	By matching	By matching	By matching	By matching	By matching	By matching	By matching	By matching	By matching
ASQSVSSSFLAWYQQKPGQAPR	gi|261488582	2422.2	808.401	3	122.97	22	1	Unmodified	666970	469110	642490	0	0	848020	671730	408280	797230	0	414370	457620	0	602500	344840	0	430740	258680	0	0	1385700	0	248680	500680	0	0	326450	0	By matching	By matching	By matching	By matching	By matching	By MS/MS	By matching	By matching	By matching	By matching	By matching	By matching	By matching
ASQSVSSSFLGWYQQK	gi|17385014	1801.86	901.932	2	118.52	16	0	Unmodified	0	211370	0	0	0	0	280930	0	861240	0	0	398480	709180	0	386930	0	0	0	0	0	0	0	172000	0	307140	0	0	0	By matching	By matching	By matching	By matching	By matching	By matching	By matching	By matching	By matching	By matching	By matching	By matching	By MS/MS
ASQSVSSSLAWYQQK	gi|323432554	1668.81	835.405	2	158.93	15	0	Unmodified	0	0	0	3505000	0	0	0	0	0	0	0	0	0	0	0	0	0	0	0	0	0	0	0	0	0	0	0	0	By matching	By matching	By matching	By MS/MS	By matching	By matching	By matching	By matching	By matching	By matching	By matching	By matching	By matching
ASQSVSSSLAWYQQKPGQAPR	gi|323432554	2275.13	1138.57	2	166.67	21	1	Unmodified	1892200	712830	802940	7664500	1213300	2991800	849510	1179200	2259700	1415000	1072800	1200100	1318900	2067400	1436900	875770	838260	366530	1594600	1053400	1122600	861150	1523600	832610	265480	799000	243610	787740	By MS/MS	By MS/MS	By MS/MS	By MS/MS	By MS/MS	By MS/MS	By MS/MS	By MS/MS	By MS/MS	By MS/MS	By MS/MS	By MS/MS	By MS/MS
ASQSVSSSNLAWYQQKPGQAPR	gi|585379732	2389.18	797.392	3	108.75	22	1	Unmodified	214540	410210	0	1528400	556690	77744	146310	143530	432520	397080	184050	0	220440	749770	0	119430	361290	78221	294420	0	523760	169900	0	794870	0	207280	0	611490	By matching	By matching	By matching	By MS/MS	By matching	By matching	By matching	By matching	By matching	By matching	By matching	By matching	By matching
ASQSVSSSYLAWFQQKPGQAPR	gi|33569979	2422.2	808.401	3	130.02	22	1	Unmodified	0	0	0	0	0	1342400	0	0	0	0	0	0	0	0	0	0	0	0	0	0	256830	0	0	0	0	0	0	0	By matching	By matching	By matching	By matching	By matching	By MS/MS	By matching	By matching	By matching	By matching	By matching	By matching	By matching
ASQSVSSSYLAWYQQK	gi|149673891	1831.87	916.937	2	272.72	16	0	Unmodified	2049900	2114600	1198000	1938100	2387100	1111500	1506400	2005600	5903400	2076100	2962200	1884200	2556100	0	1862100	1311900	3578700	1038500	1078000	1516300	1647400	1937900	787210	1150700	750520	1830400	707080	0	By MS/MS	By MS/MS	By matching	By MS/MS	By MS/MS	By MS/MS	By MS/MS	By MS/MS	By MS/MS	By MS/MS	By MS/MS	By MS/MS	By MS/MS
ASQSVSSSYLAWYQQKPGLAPR	gi|40748154	2423.22	808.741	3	80.316	22	1	Unmodified	0	0	0	0	0	0	0	0	0	0	206070	0	0	0	0	0	0	0	0	0	0	659740	0	0	0	0	0	0	By matching	By matching	By matching	By matching	By matching	By matching	By matching	By matching	By matching	By matching	By matching	By matching	By matching
ASQSVSSSYLAWYQQKPGQAPR	gi|149673891	2438.2	1220.1	2	206.45	22	1	Unmodified	6988800	5826800	6145700	3762400	12324000	5514700	6079100	5797900	8036200	8774400	11610000	6743200	10739000	11350000	9603700	3390100	7132300	2895300	2667500	5255800	6482400	4958600	2859600	4115100	3430600	7324700	909380	5459500	By MS/MS	By MS/MS	By MS/MS	By MS/MS	By MS/MS	By MS/MS	By MS/MS	By MS/MS	By MS/MS	By MS/MS	By MS/MS	By MS/MS	By MS/MS
ASQSVSSSYLAWYQQNPGQAPR	gi|630869067	2424.15	809.049	3	45.916	22	0	Unmodified	0	0	0	0	0	0	0	0	0	0	0	0	0	0	0	0	0	0	0	0	0	0	378890	0	0	0	0	0	By matching	By matching	By matching	By matching	By matching	By matching	By matching	By matching	By matching	By matching	By matching	By matching	By matching
ASQSVSSSYLAWYQQR	gi|58223152	1859.88	930.94	2	190.19	16	0	Unmodified	467800	0	0	0	0	0	0	0	0	1198500	550520	0	0	0	0	0	1130300	0	0	454800	0	456840	0	0	212430	409340	308040	0	By matching	By matching	By matching	By matching	By matching	By matching	By matching	By matching	By matching	By MS/MS	By matching	By matching	By matching
ASQSVSSSYLAWYQQRPGQAPR	gi|58223152	2466.2	823.068	3	109.72	22	1	Unmodified	0	0	0	0	0	0	0	0	0	1111300	0	0	0	0	0	0	0	0	0	0	328660	0	0	0	0	0	0	0	By matching	By matching	By matching	By matching	By matching	By matching	By matching	By matching	By matching	By MS/MS	By matching	By matching	By matching
ASQSVSSSYLGWYQQKPGQAPR	gi|70798913	2424.18	809.061	3	63.302	22	1	Unmodified	0	0	0	0	0	0	0	762390	0	0	0	0	0	0	0	0	0	0	420340	0	0	0	0	0	0	0	0	0	By matching	By matching	By matching	By matching	By matching	By matching	By matching	By MS/MS	By matching	By matching	By matching	By matching	By matching
ASQSVSSSYLTWYQQKPGQAPR	gi|630868871	2468.21	1235.1	2	76.573	22	1	Unmodified	0	0	0	0	0	0	0	0	0	0	0	0	0	0	0	0	0	0	629600	0	0	0	0	0	0	0	0	0	By matching	By matching	By matching	By matching	By matching	By matching	By matching	By matching	By matching	By matching	By matching	By matching	By matching
ASQSVSSSYLVWYQQKPGQAPR	gi|345786385	2466.23	823.076	3	69.081	22	1	Unmodified	0	0	0	1009100	0	0	243290	0	513480	0	0	0	0	1009900	766090	0	0	0	0	400370	688950	0	0	0	0	0	336010	0	By matching	By matching	By matching	By matching	By matching	By matching	By matching	By matching	By matching	By matching	By matching	By matching	By matching
ASQSVSSTYLAWYQQK	gi|817599137	1845.89	923.945	2	85.469	16	0	Unmodified	396760	498980	339570	0	780290	431920	452780	496490	881300	0	660570	664200	575780	590710	0	442580	642610	298610	0	340880	442990	0	0	384060	263200	325970	0	0	By matching	By MS/MS	By matching	By matching	By matching	By matching	By matching	By matching	By matching	By matching	By matching	By matching	By matching
ASQSVSSTYLAWYQQKPGQAPR	gi|817599137	2452.21	1227.11	2	126.14	22	1	Unmodified	1357200	1457000	306860	192680	442430	1140600	651230	481330	1713400	0	0	0	0	1310800	1060800	486900	777790	622260	305520	838950	1521200	375800	2029000	668160	564050	0	303260	0	By MS/MS	By MS/MS	By matching	By matching	By MS/MS	By MS/MS	By MS/MS	By MS/MS	By MS/MS	By matching	By matching	By matching	By matching
ASQSVSSTYLAWYQQQPGQAPR	gi|480922	2452.18	818.392	3	73.138	22	0	Unmodified	0	461080	0	0	797650	0	0	0	0	93916	0	0	0	0	0	0	0	0	0	0	0	0	0	0	0	0	0	0	By matching	By MS/MS	By matching	By matching	By MS/MS	By matching	By matching	By matching	By matching	By matching	By matching	By matching	By matching
ASQSVSSTYLAWYQQR	gi|2654048	1873.9	937.948	2	174.39	16	0	Unmodified	0	0	0	0	0	0	0	0	0	0	0	0	1971500	0	0	0	0	0	0	0	0	260930	0	0	0	0	0	267390	By matching	By matching	By matching	By matching	By matching	By matching	By matching	By matching	By matching	By matching	By matching	By matching	By MS/MS
ASQSVSSWLAWYQQK	gi|58222998	1767.86	884.929	2	64.52	15	0	Unmodified	0	0	0	0	0	0	0	0	0	0	0	0	0	0	0	0	0	0	0	0	0	0	0	0	0	0	342280	0	By matching	By matching	By matching	By matching	By matching	By matching	By matching	By matching	By matching	By matching	By matching	By matching	By matching
ASQSVSSYLAWYQQK	gi|339272255	1744.84	873.421	2	225.09	15	0	Unmodified	1092300	1730100	885550	1285600	2312700	2746600	2212700	2690300	1950200	1944100	3173500	2031000	1810500	2872300	1386700	1258700	1211600	1539900	1118600	1090900	1775600	1225300	599080	884280	740740	1632200	651070	1005600	By MS/MS	By MS/MS	By MS/MS	By MS/MS	By MS/MS	By MS/MS	By MS/MS	By MS/MS	By matching	By MS/MS	By MS/MS	By MS/MS	By MS/MS
ASQSVSSYLAWYQQKPGQAPR	gi|339272255	2351.17	1176.58	2	240.34	21	1	Unmodified	3805000	8649300	4795800	4371900	6635100	11086000	10256000	7265000	8533400	8483700	13311000	12080000	9492900	12932000	5784100	4906000	7239000	4788600	3047900	4804900	10149000	5983900	3338500	2917500	2221600	8194100	4801200	4801100	By MS/MS	By MS/MS	By MS/MS	By MS/MS	By MS/MS	By MS/MS	By MS/MS	By MS/MS	By MS/MS	By MS/MS	By MS/MS	By MS/MS	By MS/MS
ASQSVSSYLAWYQQR	gi|33757	1772.85	887.424	2	105.14	15	0	Unmodified	0	0	0	0	0	0	0	0	0	0	0	0	0	0	0	0	0	0	0	0	0	0	0	0	0	0	0	0	By matching	By matching	By matching	By matching	By matching	By matching	By matching	By MS/MS	By matching	By matching	By matching	By matching	By matching
ASQSVSSYLAWYQQRPGQAPR	gi|33757	2379.17	794.057	3	42.716	21	1	Unmodified	0	0	0	0	0	0	0	542960	0	0	0	1057800	0	0	0	0	0	0	0	0	0	0	0	543950	0	0	0	0	By matching	By matching	By matching	By matching	By matching	By matching	By matching	By matching	By matching	By matching	By matching	By MS/MS	By matching
ASQSVSTFLAWYQQK	gi|2599546	1742.86	872.431	2	72.321	15	0	Unmodified	0	0	0	0	0	0	0	0	0	0	0	0	0	0	421710	0	0	0	0	0	0	0	0	0	0	0	0	0	By matching	By matching	By matching	By matching	By matching	By matching	By matching	By matching	By matching	By matching	By matching	By matching	By matching
ASQSVSTFLAWYQQKPGQAPR	gi|2599546	2349.19	1175.59	2	152.59	21	1	Unmodified	334590	126040	891720	4433800	0	0	0	484560	1177900	0	837220	801750	0	0	0	178310	516880	334540	0	232530	175780	0	0	0	0	0	0	0	By matching	By matching	By matching	By MS/MS	By matching	By matching	By matching	By matching	By MS/MS	By matching	By matching	By MS/MS	By matching
ASQSVSTNFLAWYQQKPGQAPR	gi|353255548	2463.23	1232.61	2	117.84	22	1	Unmodified	0	0	0	0	0	0	0	0	0	0	0	0	0	0	0	0	0	0	0	0	0	0	0	0	0	1745100	0	0	By matching	By matching	By matching	By matching	By matching	By matching	By matching	By matching	By matching	By matching	By matching	By matching	By matching
ASQSVSTNLAWYQQKPGQAPR	gi|1911733	2316.16	1159.08	2	133.86	21	1	Unmodified	228150	469240	472810	317560	1083200	2119400	1912600	453560	649960	1085700	417900	1440900	522280	705230	2749100	1229700	1109300	241210	235130	1140300	1176800	273620	217690	596530	0	764790	194460	983220	By matching	By matching	By matching	By matching	By matching	By MS/MS	By MS/MS	By matching	By matching	By matching	By matching	By MS/MS	By matching
ASQSVSTNVAWYQQK	gi|662564811	1695.82	848.911	2	176.4	15	0	Unmodified	0	0	0	0	0	0	0	0	0	0	0	0	0	0	0	0	0	0	1232600	0	0	0	0	0	733530	1050000	682840	0	By matching	By matching	By matching	By matching	By matching	By matching	By matching	By matching	By matching	By matching	By matching	By matching	By matching
ASQSVSTSYLAWYQQKPGQAPR	gi|722514	2452.21	1227.11	2	107.41	22	1	Unmodified	0	0	668630	473110	946450	724110	589370	289720	0	1139000	2140900	685070	2759800	998260	489970	0	449550	337320	354380	0	2285100	394760	1272600	370140	0	0	246740	603870	By matching	By matching	By MS/MS	By matching	By matching	By MS/MS	By matching	By matching	By matching	By matching	By MS/MS	By matching	By MS/MS
ASQSVSTTSLAWYQQK	gi|470548	1783.87	892.937	2	122.08	16	0	Unmodified	0	0	0	745580	0	0	0	0	0	0	0	0	0	0	0	0	0	130100	0	58202	0	0	0	0	0	0	0	0	By matching	By matching	By matching	By MS/MS	By matching	By matching	By matching	By matching	By matching	By matching	By matching	By matching	By matching
ASQSVSTWLAWYQQK	gi|353255208	1781.87	891.937	2	139.86	15	0	Unmodified	1029200	0	0	0	0	823130	1695900	0	0	0	1672100	0	0	0	0	0	0	655280	0	0	0	0	0	0	0	0	467640	0	By MS/MS	By matching	By matching	By matching	By matching	By MS/MS	By MS/MS	By matching	By matching	By matching	By MS/MS	By matching	By matching
ASQSVSTWLAWYQQKPGK	gi|353255208	2064.04	689.014	3	44.734	18	1	Unmodified	0	0	0	0	0	0	0	544840	0	0	0	0	0	0	0	0	0	0	0	148370	165450	0	104520	200010	0	0	0	0	By matching	By matching	By matching	By matching	By matching	By matching	By matching	By MS/MS	By matching	By matching	By matching	By matching	By matching
ASQSVSTYLAWYQQK	gi|1292863	1758.86	880.429	2	121.13	15	0	Unmodified	1180700	711420	370630	585380	0	0	519060	0	0	717970	1765000	1376600	0	0	0	867000	1690400	0	2329000	831100	1183200	0	0	0	0	0	0	0	By matching	By MS/MS	By matching	By matching	By matching	By matching	By matching	By matching	By matching	By matching	By matching	By matching	By matching
ASQSVSTYLAWYQQKPGQAPR	gi|1292863	2365.18	1183.59	2	160.09	21	1	Unmodified	748590	2199300	1194100	1579300	2071500	3579200	1698400	1051800	1707900	2180600	2386300	0	1699600	2362900	397030	488010	1975100	629960	2008900	747800	1712400	1419400	1289300	862910	152300	2006900	2169200	0	By matching	By MS/MS	By matching	By matching	By matching	By MS/MS	By matching	By matching	By matching	By MS/MS	By MS/MS	By matching	By matching
ASQSVSYNLAWYQQK	gi|238284	1771.85	886.926	2	143.05	15	0	Unmodified	0	0	0	0	0	0	0	405180	751030	0	0	893430	0	553930	0	0	340900	0	0	0	0	0	0	0	0	0	495090	0	By matching	By matching	By matching	By matching	By matching	By matching	By matching	By MS/MS	By matching	By matching	By matching	By MS/MS	By matching
ASQSVSYNLAWYQQKPGQAPR	gi|238284	2378.18	793.726	3	111.22	21	1	Unmodified	0	2277800	687720	636150	0	0	1006100	0	0	0	0	0	1057400	1567500	0	0	0	0	409520	0	0	0	0	776800	597500	0	0	0	By matching	By MS/MS	By MS/MS	By matching	By matching	By matching	By MS/MS	By matching	By matching	By matching	By matching	By matching	By MS/MS
ASQSVTNNLAWYQQKPGQAPR	gi|695942288	2343.17	1172.59	2	152.9	21	1	Unmodified	0	0	0	0	0	0	0	0	0	0	0	0	0	0	0	0	0	0	0	0	0	0	0	4665000	0	0	618120	0	By matching	By matching	By matching	By matching	By matching	By matching	By matching	By matching	By matching	By matching	By matching	By matching	By matching
ASQSVTNNVAWYQQKPGQAPR	gi|315487982	2329.16	777.385	3	75.548	21	1	Unmodified	0	443610	0	0	0	0	0	0	0	0	0	0	0	0	0	0	0	0	0	0	0	0	0	805060	201790	0	0	0	By matching	By MS/MS	By matching	By matching	By matching	By matching	By matching	By matching	By matching	By matching	By matching	By matching	By matching
ASQSVTNNYLAWYQQK	gi|77378362	1899.91	950.956	2	94.487	16	0	Unmodified	0	0	0	0	0	0	0	0	0	799280	0	0	0	0	0	0	0	1177300	0	0	495590	0	0	0	0	0	0	0	By matching	By matching	By matching	By matching	By matching	By matching	By matching	By matching	By matching	By matching	By matching	By matching	By matching
ASQSVTNSYLAWYQQKPGQAPR	gi|385271654	2479.22	827.408	3	41.513	22	1	Unmodified	0	0	226870	707700	713430	0	0	0	0	467720	0	0	0	0	0	0	1341300	0	0	616040	0	0	398350	0	0	743020	552420	0	By matching	By matching	By matching	By matching	By matching	By matching	By matching	By matching	By matching	By matching	By matching	By matching	By matching
ASQSVTNYLAWYQQKPGQAPR	gi|534286421	2392.19	798.397	3	82.865	21	1	Unmodified	0	2148700	0	0	0	0	0	0	0	0	310320	0	0	749250	0	0	270580	0	0	0	0	0	0	0	228620	0	0	0	By matching	By MS/MS	By matching	By matching	By matching	By matching	By matching	By matching	By matching	By matching	By matching	By matching	By matching
ASQSVTSNLAWYQQKPGQAPR	gi|58223040	2316.16	1159.08	2	98.175	21	1	Unmodified	234050	964270	264460	306460	434890	779850	306550	899370	0	309600	779000	468740	1197100	1629600	0	0	0	396560	455560	300450	353930	930430	770240	0	311130	457650	769170	0	By matching	By matching	By matching	By matching	By matching	By MS/MS	By matching	By MS/MS	By matching	By MS/MS	By matching	By matching	By matching
ASQSVTSNVAWYQQK	gi|260600211	1695.82	848.911	2	136.33	15	0	Unmodified	0	0	0	0	0	0	0	0	0	0	1538600	0	0	0	0	0	0	0	0	0	0	0	548890	0	0	0	0	0	By matching	By matching	By matching	By matching	By matching	By matching	By matching	By matching	By matching	By matching	By MS/MS	By matching	By matching
ASQSVTSNVAWYQQKPGQAPR	gi|260600211	2302.15	1152.07	2	158.45	21	1	Unmodified	2172400	0	1835100	0	0	0	0	0	0	0	0	0	4543900	0	0	3898400	0	0	2966100	0	0	0	2461900	0	0	0	1274700	0	By MS/MS	By matching	By MS/MS	By matching	By matching	By matching	By matching	By matching	By matching	By matching	By matching	By matching	By MS/MS
ASQSVTSNYLAWYQQKPGQAPR	gi|662563940	2479.22	827.408	3	62.589	22	1	Unmodified	788070	1381800	458880	0	126970	372730	563160	981540	0	0	703990	1051800	784830	989670	1303300	698150	0	0	0	0	719710	527600	0	308050	0	0	0	0	By matching	By matching	By matching	By matching	By matching	By matching	By matching	By MS/MS	By matching	By matching	By matching	By MS/MS	By MS/MS
ASQSVTSSFLAWYQQKPGQAPR	gi|33569862	2436.22	813.073	3	98.882	22	1	Unmodified	1084200	0	928160	0	0	273530	0	345760	0	0	0	475620	0	425170	0	0	351600	0	286540	0	281930	0	0	0	0	0	0	0	By MS/MS	By matching	By MS/MS	By matching	By matching	By matching	By matching	By matching	By matching	By matching	By matching	By matching	By matching
ASQSVTSYLAWYQQK	gi|910277164	1758.86	880.429	2	108.06	15	0	Unmodified	0	711420	0	0	967200	609600	0	322700	0	0	0	0	0	1007500	0	0	0	0	2329000	831100	0	0	0	0	0	0	0	0	By matching	By MS/MS	By matching	By matching	By MS/MS	By matching	By matching	By matching	By matching	By matching	By matching	By matching	By matching
ASQSVTSYLAWYQQKPGQAPR	gi|910277164	2365.18	1183.59	2	71.929	21	1	Unmodified	0	0	0	0	0	0	0	0	0	0	0	0	0	0	0	0	0	0	0	0	0	0	0	0	0	0	2169200	0	By matching	By matching	By matching	By matching	By matching	By matching	By matching	By matching	By matching	By matching	By matching	By matching	By matching
ASQSVTSYLNWYQQKPGKAPK	gi|21669293	2380.22	794.406	3	86.005	21	2	Unmodified	408260	759490	1773300	0	4974400	0	0	0	0	0	0	0	0	2278400	0	0	0	0	0	0	548520	627170	0	0	0	211260	0	0	By matching	By matching	By matching	By matching	By MS/MS	By matching	By matching	By matching	By matching	By matching	By matching	By matching	By matching
ASQSVYNNLAWYQQR	gi|630868855	1826.87	914.435	2	105.95	15	0	Unmodified	0	0	0	0	0	0	0	0	0	0	0	0	0	0	0	0	0	0	0	0	619670	0	0	0	0	0	0	0	By matching	By matching	By matching	By matching	By matching	By matching	By matching	By matching	By matching	By matching	By matching	By matching	By matching
ASQSVYSNLAWYQQK	gi|9295281	1771.85	886.926	2	113.37	15	0	Unmodified	0	0	0	0	0	0	0	0	0	0	0	0	674850	0	0	0	0	0	0	0	0	0	0	0	0	0	0	0	By matching	By matching	By matching	By matching	By matching	By matching	By matching	By matching	By matching	By matching	By matching	By matching	By MS/MS
ASQSVYSNYLAWYQQK	gi|70798769	1934.92	968.458	2	103.77	16	0	Unmodified	0	0	0	0	0	0	0	0	0	0	0	0	0	1779300	0	0	0	0	0	0	0	0	0	0	0	0	0	0	By matching	By matching	By matching	By matching	By matching	By matching	By matching	By matching	By matching	By matching	By matching	By matching	By matching
ASQSVYSNYLAWYQQKPGQAPR	gi|70798769	2541.24	848.08	3	98.804	22	1	Unmodified	0	0	0	0	0	0	0	0	0	0	0	0	0	3095200	0	0	0	0	0	0	0	0	0	0	0	0	0	0	By matching	By matching	By matching	By matching	By matching	By matching	By matching	By matching	By matching	By matching	By matching	By matching	By matching
ASQTIDNYLNWYQQK	gi|77379544	1870.88	936.442	2	95.822	15	0	Unmodified	0	0	0	0	229900	263850	938190	177690	0	0	0	0	0	0	0	0	0	0	0	0	0	0	0	0	0	0	0	0	By matching	By matching	By matching	By matching	By matching	By matching	By MS/MS	By matching	By matching	By matching	By matching	By matching	By matching
ASQTIDNYLNWYQQKPGK	gi|77379544	2153.05	1077.53	2	148.33	18	1	Unmodified	0	0	0	0	0	0	1910600	0	0	0	0	0	0	0	0	0	0	0	0	0	0	0	0	0	0	0	0	0	By matching	By matching	By matching	By matching	By matching	By matching	By MS/MS	By matching	By matching	By matching	By matching	By matching	By matching
ASQTIISYLNWYQQKPGK	gi|219566441	2124.1	1063.05	2	128.45	18	1	Unmodified	0	0	0	0	0	0	0	0	0	0	0	0	1318200	0	0	0	0	0	0	0	0	0	0	0	0	0	0	0	By matching	By matching	By matching	By matching	By matching	By matching	By matching	By matching	By matching	By matching	By matching	By matching	By MS/MS
ASQTINSYLNWYQQK	gi|2385498	1842.89	922.445	2	141.85	15	0	Unmodified	0	0	0	0	0	0	0	0	0	0	1286000	0	0	0	0	0	0	0	0	0	0	0	0	0	0	0	0	0	By matching	By matching	By matching	By matching	By matching	By matching	By matching	By matching	By matching	By matching	By MS/MS	By matching	By matching
ASQTINSYLNWYQQKPGK	gi|2385498	2125.06	709.353	3	53.981	18	1	Unmodified	0	0	0	0	0	0	0	0	0	0	0	0	0	0	0	0	0	0	0	0	0	1088600	0	0	0	0	0	0	By matching	By matching	By matching	By matching	By matching	By matching	By matching	By matching	By matching	By matching	By matching	By matching	By matching
ASQTISGWLAWYQQKPGKAPK	gi|37694627	2344.23	782.411	3	77.505	21	2	Unmodified	0	0	0	0	0	0	1195100	0	0	0	0	0	0	0	0	0	0	0	0	0	0	0	0	0	0	0	0	0	By matching	By matching	By matching	By matching	By matching	By matching	By MS/MS	By matching	By matching	By matching	By matching	By matching	By matching
ASQTISIYLNWYQQKPGK	gi|33570248	2124.1	1063.05	2	72.187	18	1	Unmodified	0	0	0	0	0	0	0	0	0	0	0	0	1318200	0	0	0	0	0	0	0	0	0	0	0	0	0	0	0	By matching	By matching	By matching	By matching	By matching	By matching	By matching	By matching	By matching	By matching	By matching	By matching	By MS/MS
ASQTISIYLNWYQQKPGKAPK	gi|33570248	2420.29	807.762	3	93.495	21	2	Unmodified	0	0	0	0	0	0	0	0	0	0	0	0	4131400	0	0	0	0	0	0	0	0	0	0	0	0	0	0	0	By matching	By matching	By matching	By matching	By matching	By matching	By matching	By matching	By matching	By matching	By matching	By matching	By MS/MS
ASQTISNYLNWYQQK	gi|4378380	1842.89	922.445	2	237.46	15	0	Unmodified	0	0	0	0	0	0	0	0	0	0	1286000	0	0	0	545850	0	822940	0	231920	0	0	0	0	0	0	0	0	0	By matching	By matching	By matching	By matching	By matching	By matching	By matching	By matching	By matching	By matching	By MS/MS	By matching	By matching
ASQTISNYLNWYQQKPGK	gi|4378380	2125.06	1063.53	2	81.656	18	1	Unmodified	0	0	251130	159640	281180	301950	0	0	0	0	0	0	0	0	0	304530	0	0	0	0	0	1666800	141710	0	0	0	220950	0	By matching	By matching	By matching	By matching	By matching	By matching	By matching	By matching	By matching	By matching	By matching	By matching	By matching
ASQTISSYVNWYQK	gi|27650652	1673.8	837.902	2	86.944	14	0	Unmodified	0	0	0	0	0	0	0	0	1801100	0	0	298800	471240	0	0	0	0	0	1145700	0	0	0	0	0	0	0	0	0	By matching	By matching	By matching	By matching	By matching	By matching	By matching	By matching	By matching	By matching	By matching	By matching	By matching
ASQTLGNYLNWYQQK	gi|695942678	1812.88	907.44	2	84.753	15	0	Unmodified	0	0	409580	0	0	0	0	0	393700	259640	262810	0	0	0	0	0	0	0	0	0	0	0	0	277020	403340	0	0	0	By matching	By matching	By MS/MS	By matching	By matching	By matching	By matching	By matching	By matching	By matching	By matching	By matching	By matching
ASQTVGNWLAWYQQKPGK	gi|58223266	2061.04	688.014	3	82.942	18	1	Unmodified	0	0	0	2865400	0	0	0	0	0	0	0	0	0	0	0	0	0	0	0	0	0	0	0	0	0	0	0	0	By matching	By matching	By matching	By MS/MS	By matching	By matching	By matching	By matching	By matching	By matching	By matching	By matching	By matching
ASQTVGSSLAWYQQK	gi|70798697	1652.82	827.408	2	188.63	15	0	Unmodified	0	0	0	4071100	0	0	0	0	0	0	0	0	0	0	248360	0	0	0	299080	0	0	0	0	0	0	0	0	0	By matching	By matching	By matching	By MS/MS	By matching	By matching	By matching	By matching	By matching	By matching	By matching	By matching	By matching
ASQTVISSLAWYQQKPGQAPR	gi|33664	2315.2	1158.6	2	102.47	21	1	Unmodified	0	0	0	0	0	0	0	0	0	0	0	0	0	0	0	0	0	0	0	0	0	0	3017200	0	0	1182500	0	0	By matching	By matching	By matching	By matching	By matching	By matching	By matching	By matching	By matching	By matching	By matching	By matching	By matching
ASQTVNNNYLAWYQQKPGQAPR	gi|40748174	2533.25	1267.62	2	105.5	22	1	Unmodified	0	0	0	10979000	0	0	0	0	0	0	0	0	0	0	0	0	0	0	0	0	0	0	0	0	0	0	0	0	By matching	By matching	By matching	By MS/MS	By matching	By matching	By matching	By matching	By matching	By matching	By matching	By matching	By matching
ASQTVSSNLAWYQQKPGQAPR	gi|30841934	2316.16	1159.08	2	81.643	21	1	Unmodified	0	0	0	0	119530	0	322280	0	471810	0	282430	434960	1039200	350110	358610	0	0	312080	0	288510	379960	721230	297070	124960	159610	350790	158270	0	By matching	By matching	By matching	By matching	By matching	By matching	By matching	By matching	By matching	By matching	By matching	By matching	By MS/MS
ASQTVSTNLAWYQQKPGQAPR	gi|662564725	2330.18	777.726	3	114.99	21	1	Unmodified	1541400	0	0	0	0	508790	0	0	0	0	0	0	0	0	0	0	0	0	0	0	521460	0	0	0	0	541510	0	0	By MS/MS	By matching	By matching	By matching	By matching	By MS/MS	By matching	By matching	By matching	By matching	By matching	By matching	By matching
ASSIIDELFQDR	gi|26665859	1392.69	697.344	2	136.01	12	0	Unmodified	435350	271070	237050	0	0	185680	0	274680	0	156400	291850	247610	204280	459990	275010	0	291220	340200	327580	307090	233930	183600	147450	322570	145510	362480	180320	357400	By MS/MS	By MS/MS	By MS/MS	By matching	By matching	By matching	By matching	By MS/MS	By matching	By matching	By MS/MS	By matching	By MS/MS
ASSLEDGVPSR	gi|323432975	1116.54	559.271	2	100.04	11	0	Unmodified	0	0	0	0	0	0	0	0	0	0	0	0	0	0	0	0	0	0	0	0	1147600	0	0	0	0	0	0	0	By matching	By matching	By matching	By matching	By matching	By matching	By matching	By matching	By matching	By matching	By matching	By matching	By matching
ASSLEGGVPSR	gi|7438723	1058.54	530.268	2	105.25	11	0	Unmodified	197550	125400	135930	422380	924580	263180	196120	153900	238950	201480	412720	310020	430780	235320	171970	235300	110240	179110	114370	190440	252920	132030	129070	78662	180070	0	99070	167680	By MS/MS	By matching	By matching	By MS/MS	By MS/MS	By MS/MS	By matching	By MS/MS	By MS/MS	By matching	By MS/MS	By matching	By matching
ASSLENGVPSR	gi|54781326	1115.56	558.779	2	105.25	11	0	Unmodified	0	0	0	0	0	0	0	0	0	0	0	0	0	0	0	0	0	1279400	0	0	0	0	0	0	0	0	0	0	By matching	By matching	By matching	By matching	By matching	By matching	By matching	By matching	By matching	By MS/MS	By matching	By matching	By matching
ASSLESGVPSR	gi|442828	1088.55	545.273	2	178.71	11	0	Unmodified	6215500	2156100	5060100	5394000	8898100	7867300	9009700	5852200	7182700	8574800	15511000	6037400	7671400	9490000	4426700	4116800	6699200	3529300	5860300	7344400	6251900	4054100	1532900	2599700	1595600	2166000	0	5146000	By MS/MS	By matching	By matching	By MS/MS	By matching	By MS/MS	By MS/MS	By MS/MS	By MS/MS	By MS/MS	By MS/MS	By MS/MS	By matching
ASSLESGVSPR	gi|58223128	1088.55	545.273	2	107.34	11	0	Unmodified	6215500	0	0	0	0	0	0	0	0	0	0	0	0	0	0	0	0	0	0	7344400	0	0	0	0	0	0	3562300	0	By MS/MS	By matching	By matching	By matching	By matching	By matching	By matching	By matching	By matching	By matching	By matching	By matching	By matching
ASSLQSGVPSR	gi|323432880	1087.56	544.781	2	96.23	11	0	Unmodified	0	330310	763130	1010700	747460	1973300	0	0	0	0	1018200	0	0	593820	291230	27819	0	0	34195	0	1186500	385950	116190	179080	140190	516410	0	0	By matching	By matching	By MS/MS	By matching	By MS/MS	By matching	By matching	By matching	By matching	By matching	By MS/MS	By matching	By matching
ASTLDDGVPSR	gi|353255014	1116.54	559.271	2	110.08	11	0	Unmodified	191870	0	0	0	0	434000	0	0	0	0	210100	0	0	343030	0	0	0	0	0	0	1147600	0	0	486250	0	0	0	373540	By matching	By matching	By matching	By MS/MS	By matching	By matching	By matching	By matching	By matching	By matching	By matching	By matching	By matching
ASTLENGVPSR	gi|700652806	1129.57	565.786	2	72.731	11	0	Unmodified	229430	0	0	0	212320	266940	108080	68281	116280	0	93921	132830	158780	335270	324720	250870	106220	95989	66884	147410	633200	126450	60690	83844	42059	0	114560	98206	By matching	By matching	By matching	By matching	By matching	By matching	By matching	By matching	By matching	By matching	By matching	By matching	By matching
ASTLESGVPSR	gi|662702284	1102.56	552.281	2	153.54	11	0	Unmodified	2349100	1321300	2089100	4015700	8112400	5613500	3988700	2419700	0	4020800	4523200	4840600	5220300	6042300	2575900	3625200	10507000	2671000	4459000	2917400	3566600	1918600	1267800	1898400	1374000	2117200	2579400	3195900	By MS/MS	By MS/MS	By matching	By MS/MS	By MS/MS	By MS/MS	By MS/MS	By MS/MS	By MS/MS	By MS/MS	By MS/MS	By MS/MS	By MS/MS
ASTLETGVPSR	gi|662563914	1116.58	559.289	2	122.55	11	0	Unmodified	493270	196340	352570	372460	591820	697780	590570	517850	1400800	548120	635010	466320	400270	817370	903040	917060	567400	353510	461170	599610	686970	428610	301010	881490	183360	314430	306120	542460	By MS/MS	By matching	By MS/MS	By matching	By MS/MS	By MS/MS	By MS/MS	By MS/MS	By MS/MS	By MS/MS	By MS/MS	By MS/MS	By MS/MS
ASTLQSGVPSR	gi|315487930	1101.58	551.789	2	163.71	11	0	Unmodified	582330	234660	1157600	8294700	977440	1222300	1199100	396070	741070	948380	1150200	663910	462740	568250	441570	877770	498530	471600	830050	738840	1346200	879050	291240	0	294600	441700	0	757090	By MS/MS	By matching	By matching	By MS/MS	By matching	By MS/MS	By matching	By matching	By matching	By matching	By MS/MS	By matching	By matching
ASWPLTFGGGTK	gi|7439069	1220.62	611.309	2	87.641	12	0	Unmodified	0	0	0	0	0	898130	0	0	0	0	0	0	0	0	0	0	0	0	0	0	0	0	0	0	0	0	0	0	By matching	By matching	By matching	By matching	By matching	By MS/MS	By matching	By matching	By matching	By matching	By matching	By matching	By matching
ATDIPDRFSGSGSGTDFTLTISR	gi|910277234	2400.16	801.052	3	110.98	23	1	Unmodified	854350	0	377090	0	972820	0	1334300	385230	1363100	661110	734600	722740	813390	1920500	1071700	471740	1637400	0	601270	515590	0	487480	341880	0	120250	0	0	537650	By matching	By matching	By matching	By matching	By matching	By matching	By MS/MS	By matching	By matching	By matching	By matching	By matching	By matching
ATDSAMYYCAR	gi|46254108	1307.53	654.764	2	92.538	11	0	Unmodified	0	0	0	0	0	0	0	0	0	0	0	0	0	279450	0	0	0	0	0	0	0	0	0	0	0	0	0	0	By matching	By matching	By matching	By matching	By matching	By matching	By matching	By matching	By matching	By matching	By matching	By matching	By matching
ATDVPAR	gi|561703	728.382	365.191	2	79.469	7	0	Unmodified	0	0	0	0	0	0	0	0	0	0	0	0	3178100	0	0	0	0	0	0	2153000	0	0	0	0	0	0	0	0	By matching	By matching	By matching	By matching	By matching	By matching	By matching	By matching	By matching	By matching	By matching	By matching	By MS/MS
ATEHLSTLSEK	gi|90108666	1214.61	608.307	2	98.754	11	0	Unmodified	0	290470	125670	144590	210250	178230	144160	246140	161850	315540	226250	198860	120900	253600	233190	382270	244700	237890	389230	283350	249980	125080	205910	140830	124310	355280	113690	203960	By matching	By MS/MS	By matching	By matching	By matching	By matching	By matching	By matching	By matching	By matching	By matching	By matching	By matching
ATGIPDR	gi|817599137	728.382	365.191	2	113.5	7	0	Unmodified	102200	1710100	1451500	3225800	2045100	94697	2232800	1964500	3423700	0	0	2873000	3178100	4420000	2876100	275400	2828800	2552100	2066700	0	0	1959800	0	2621000	0	0	1218200	2028100	By matching	By MS/MS	By MS/MS	By MS/MS	By MS/MS	By matching	By MS/MS	By matching	By matching	By matching	By matching	By MS/MS	By MS/MS
ATGIPDRFGGSGSGTDFTLTISR	gi|62861018	2312.14	771.713	3	100.53	23	1	Unmodified	1645300	912450	1087300	1230600	1698200	0	977000	646650	0	0	853310	0	733720	0	0	0	0	567950	1855100	0	0	0	0	0	0	0	338010	427500	By MS/MS	By matching	By matching	By matching	By MS/MS	By matching	By matching	By matching	By matching	By matching	By matching	By matching	By matching
ATGIPDRFR	gi|52630839	1031.55	516.776	2	108.57	9	1	Unmodified	420940	227700	187740	139730	420250	752070	333950	159250	678120	205550	266130	374390	350450	417110	430790	157400	178040	258030	351970	171820	187390	281290	224350	120010	177390	181310	181160	274120	By matching	By matching	By matching	By matching	By matching	By matching	By matching	By matching	By matching	By matching	By matching	By MS/MS	By matching
ATGIPDRFSGGGSGTDFTLTISR	gi|662564122	2312.14	771.713	3	82.146	23	1	Unmodified	1645300	0	0	0	1698200	0	0	0	1608600	0	0	0	0	0	0	0	0	0	0	0	0	1113400	0	0	0	0	0	0	By MS/MS	By matching	By matching	By matching	By MS/MS	By matching	By matching	By matching	By MS/MS	By matching	By matching	By matching	By matching
ATGIPDRFSGIGSGTDFTLTISR	gi|109693184	2368.2	790.401	3	73.796	23	1	Unmodified	0	0	0	1259300	117100	0	0	0	252130	0	0	0	0	0	0	0	0	0	0	0	0	0	102050	0	0	0	0	0	By matching	By matching	By matching	By MS/MS	By matching	By matching	By matching	By matching	By matching	By matching	By matching	By matching	By matching
ATGIPDRFSGR	gi|21669109	1175.6	588.802	2	84.507	11	1	Unmodified	483940	645450	289510	236760	237660	195690	313870	155870	286200	0	434840	240910	249040	0	263080	310350	404550	185180	222810	0	434830	0	178780	0	211080	0	123900	283550	By matching	By matching	By matching	By matching	By matching	By matching	By matching	By matching	By matching	By matching	By matching	By matching	By matching
ATGIPDRFSGSASGTDFTLTISR	gi|125799	2356.17	786.389	3	59.618	23	1	Unmodified	0	0	0	0	1978200	0	0	0	0	0	0	0	0	2053600	0	0	0	0	0	0	0	0	0	0	0	0	0	0	By matching	By matching	By matching	By matching	By MS/MS	By matching	By matching	By matching	By matching	By matching	By matching	By matching	By matching
ATGIPDRFSGSGSGADFTLTISR	gi|21669329	2312.14	771.713	3	77.631	23	1	Unmodified	0	0	0	0	1698200	1193500	0	0	1608600	996560	0	870480	729470	0	0	298300	0	0	0	557200	0	0	0	0	0	0	0	0	By matching	By matching	By matching	By matching	By MS/MS	By matching	By matching	By matching	By MS/MS	By matching	By matching	By matching	By matching
ATGIPDRFSGSGSGSDFTLTISR	gi|33569979	2328.13	777.045	3	41.648	23	1	Unmodified	1370600	0	0	0	0	0	0	0	0	0	0	0	0	0	0	0	0	0	0	0	0	0	0	0	0	0	0	0	By MS/MS	By matching	By matching	By matching	By matching	By matching	By matching	By matching	By matching	By matching	By matching	By matching	By matching
ATGIPDRFSGSGSGTDFSLTISR	gi|695943023	2328.13	777.045	3	67.11	23	1	Unmodified	0	0	0	0	0	0	0	0	0	0	0	295090	903750	0	1362600	717740	0	388960	0	298100	0	0	0	384030	304210	839180	983320	0	By matching	By matching	By matching	By matching	By matching	By matching	By matching	By matching	By matching	By matching	By matching	By matching	By MS/MS
ATGIPDRFSGSGSGTDFSLTITR	gi|4378284	2342.15	1172.08	2	81.224	23	1	Unmodified	0	0	0	0	0	0	0	0	0	0	0	0	0	0	0	0	0	0	0	0	0	6603300	0	1656400	0	0	0	0	By matching	By matching	By matching	By matching	By matching	By matching	By matching	By matching	By matching	By matching	By matching	By matching	By matching
ATGIPDRFSGSGSGTDFTLSISR	gi|353255808	2328.13	777.045	3	70.501	23	1	Unmodified	501630	1967700	0	0	0	0	0	0	0	0	0	0	0	0	0	0	0	0	0	0	333380	0	0	0	0	0	0	0	By matching	By MS/MS	By matching	By matching	By matching	By matching	By matching	By matching	By matching	By matching	By matching	By matching	By matching
ATGIPDRFSGSGSGTDFTLTITR	gi|38541890	2356.17	786.389	3	65.915	23	1	Unmodified	0	0	0	0	0	1540200	0	0	0	0	0	0	0	2053600	0	0	780440	0	0	778450	653790	918330	0	0	0	344390	0	429080	By matching	By matching	By matching	By matching	By matching	By MS/MS	By matching	By matching	By matching	By matching	By matching	By matching	By matching
ATGIPDRFSGSGSGTDFTLTLSR	gi|70797863	2342.15	1172.08	2	158.99	23	1	Unmodified	20919000	23300000	17551000	27949000	40276000	28026000	34158000	14189000	36561000	19365000	21783000	22182000	27015000	42788000	19514000	10263000	13602000	11361000	11304000	17212000	13247000	16533000	11259000	3899800	3791800	9728500	6451500	10385000	By MS/MS	By MS/MS	By MS/MS	By MS/MS	By MS/MS	By MS/MS	By MS/MS	By MS/MS	By MS/MS	By MS/MS	By MS/MS	By MS/MS	By MS/MS
ATGIPDRFSGSGSGTDFTLTVSR	gi|831182945	2328.13	777.045	3	73.796	23	1	Unmodified	0	1967700	0	0	2213000	0	0	0	0	0	335530	1689600	903750	1337800	912400	0	0	0	990690	622460	1195100	0	0	0	0	0	0	0	By matching	By MS/MS	By matching	By matching	By MS/MS	By matching	By matching	By matching	By matching	By matching	By matching	By matching	By MS/MS
ATGIPDRFSGSGSGTDFTVTISR	gi|2072274	2328.13	777.045	3	62.589	23	1	Unmodified	0	1967700	0	0	0	0	0	0	0	0	0	0	0	0	0	0	0	0	0	0	0	0	0	0	0	0	0	0	By matching	By MS/MS	By matching	By matching	By matching	By matching	By matching	By matching	By matching	By matching	By matching	By matching	By matching
ATGIPDRFSGSGSGTEFSLTISR	gi|662564084	2342.15	781.717	3	105.57	23	1	Unmodified	0	0	0	0	0	0	0	0	0	0	0	0	0	0	0	0	0	0	13789000	0	0	0	0	0	2435800	0	0	0	By matching	By matching	By matching	By matching	By matching	By matching	By matching	By matching	By matching	By matching	By matching	By matching	By matching
ATGIPDRFSGSGSGTEFTLTISR	gi|353255548	2356.17	786.389	3	77.959	23	1	Unmodified	770580	0	0	1409500	1978200	0	0	0	0	2184200	0	0	0	0	0	0	0	0	310150	0	0	0	0	0	0	0	0	392570	By matching	By matching	By matching	By matching	By MS/MS	By matching	By matching	By matching	By matching	By MS/MS	By matching	By matching	By matching
ATGIPDRFSGTGSGTDFTLTISR	gi|662564844	2356.17	786.389	3	66.122	23	1	Unmodified	785780	1047100	948380	0	0	1540200	1109400	887270	0	0	854390	914450	0	2053600	0	598860	0	463480	1840500	0	0	0	756780	547090	326240	0	944300	0	By MS/MS	By matching	By matching	By matching	By matching	By MS/MS	By MS/MS	By matching	By matching	By matching	By matching	By matching	By matching
ATGIPDRVSGSGSGTDFTLTISR	gi|2058536	2294.15	1148.08	2	79.029	23	1	Unmodified	0	0	0	2175400	0	0	0	0	0	0	0	0	0	0	0	0	0	0	0	0	0	0	0	0	0	0	0	0	By matching	By matching	By matching	By MS/MS	By matching	By matching	By matching	By matching	By matching	By matching	By matching	By matching	By matching
ATGIPDTFSGSGSGTDFTLTVTR	gi|722616	2287.1	1144.55	2	46.818	23	0	Unmodified	423210	0	0	0	194020	0	0	155000	453530	0	0	0	264820	502740	219780	0	0	0	0	439750	0	0	0	329810	0	0	0	0	By MS/MS	By matching	By matching	By matching	By matching	By matching	By matching	By matching	By matching	By matching	By matching	By matching	By matching
ATGIPERFSGSGSGTDFTLTISR	gi|831182941	2356.17	786.389	3	76.78	23	1	Unmodified	0	0	0	0	0	0	1109400	0	2419600	2184200	0	0	1253600	0	931810	0	780440	0	1840500	0	0	0	0	0	0	0	0	0	By matching	By matching	By matching	By matching	By matching	By matching	By MS/MS	By matching	By MS/MS	By MS/MS	By matching	By matching	By matching
ATGLPAR	gi|662564289	684.392	343.196	2	119.56	7	0	Unmodified	0	1055600	1070200	2037100	1205500	0	0	0	0	967780	0	1859700	0	0	1090900	0	0	1428700	1041200	1193800	0	0	918310	946090	0	0	663960	0	By matching	By matching	By MS/MS	By MS/MS	By matching	By matching	By matching	By matching	By matching	By MS/MS	By matching	By MS/MS	By matching
ATGPALR	gi|119590254	684.392	343.196	2	100.07	7	0	Unmodified	0	0	1070200	2037100	0	4584900	1210400	1061700	1107000	0	0	0	1858100	1742800	1090900	2390700	1737200	0	0	1193800	0	1569300	0	0	0	44866	663960	0	By matching	By matching	By MS/MS	By MS/MS	By MS/MS	By MS/MS	By MS/MS	By matching	By matching	By matching	By matching	By matching	By MS/MS
ATGSVTSPYFAWYQQKPGQAPR	gi|353255094	2439.2	814.066	3	55.267	22	1	Unmodified	0	0	0	0	0	0	0	0	0	0	0	0	0	0	0	0	0	0	0	0	0	0	0	0	1495300	0	0	0	By matching	By matching	By matching	By matching	By matching	By matching	By matching	By matching	By matching	By matching	By matching	By matching	By matching
ATGVPDRFSASGSGTDFTLSISR	gi|345786433	2328.13	777.045	3	107.39	23	1	Unmodified	0	0	0	0	0	0	0	0	0	0	0	0	0	0	1479700	0	0	0	0	0	0	866750	0	0	0	0	0	647900	By matching	By matching	By matching	By matching	By matching	By matching	By matching	By matching	By matching	By matching	By matching	By matching	By matching
ATGVPDRFSGSASGTDFTLTISR	gi|480917	2342.15	781.717	3	80.41	23	1	Unmodified	0	0	0	0	0	0	19966000	0	0	0	0	0	0	0	0	0	0	0	0	0	0	0	0	0	0	0	0	0	By matching	By matching	By matching	By matching	By matching	By matching	By MS/MS	By matching	By matching	By matching	By matching	By matching	By matching
ATGVPDRFSGSGSGTDFTLTISR	gi|12655488	2328.13	777.045	3	86.761	23	1	Unmodified	2352800	907440	1360900	4237000	2074700	1855700	2314200	1210800	1610400	992220	1553400	0	507800	899370	0	1830100	517650	1250000	615410	766170	0	0	1617100	0	348140	470030	0	550040	By MS/MS	By matching	By matching	By MS/MS	By MS/MS	By MS/MS	By matching	By MS/MS	By MS/MS	By MS/MS	By matching	By matching	By matching
ATLMCLISDFYPGAVTVAWK	gi|345786331	2242.12	1122.06	2	78.78	20	0	Unmodified	0	0	0	212240	0	352940	362290	0	341500	0	0	0	0	276750	95503	765970	457800	0	125970	0	0	0	0	0	0	378140	0	408260	By matching	By matching	By matching	By matching	By matching	By matching	By matching	By matching	By MS/MS	By matching	By matching	By matching	By matching
ATLSCR	gi|817599137	706.343	354.172	2	128.75	6	0	Unmodified	0	1359300	974770	2395900	1457600	2192000	0	0	221050	0	2356600	0	1692100	1741700	0	2572700	2091600	0	1498500	157890	2629800	152960	189370	215980	0	1714700	0	0	By matching	By MS/MS	By matching	By matching	By matching	By MS/MS	By matching	By matching	By matching	By matching	By MS/MS	By matching	By matching
ATLSVDTSK	gi|2145164	920.481	461.241	2	101.46	9	0	Unmodified	0	49623	0	0	0	541790	0	0	73642	0	254370	0	0	0	0	259380	150290	0	0	0	183490	0	0	0	34820	103850	0	0	By matching	By matching	By matching	By matching	By matching	By MS/MS	By matching	By matching	By matching	By matching	By MS/MS	By matching	By matching
ATLVCLISDFYPGAVT	gi|54038911	1725.86	863.932	2	108.97	16	0	Unmodified	0	594930	0	758130	601170	642420	479260	240510	0	520740	553700	0	0	693430	453090	0	1123200	0	530520	556440	0	0	0	0	286680	581490	0	622030	By matching	By matching	By matching	By matching	By matching	By matching	By matching	By MS/MS	By matching	By MS/MS	By matching	By matching	By matching
ATLVCLISDFYPGAVTVAWK	gi|16554039	2210.14	1106.07	2	267.36	20	0	Unmodified	29553000	43435000	31301000	71309000	47465000	63550000	53738000	28240000	59011000	43492000	52942000	19045000	17909000	92686000	61454000	89265000	74474000	21665000	42333000	85716000	33064000	23526000	5688200	44629000	19414000	57124000	11967000	105170000	By MS/MS	By MS/MS	By MS/MS	By MS/MS	By MS/MS	By MS/MS	By MS/MS	By MS/MS	By MS/MS	By MS/MS	By MS/MS	By MS/MS	By MS/MS
ATQSITSNLAWYQQKPGQAPR	gi|630869083	2344.19	782.397	3	100.69	21	1	Unmodified	0	0	0	0	0	0	0	0	0	0	0	0	0	0	0	0	230080	0	0	0	0	0	0	0	0	0	734210	0	By matching	By matching	By matching	By matching	By matching	By matching	By matching	By matching	By matching	By matching	By matching	By matching	By matching
ATQSVSNNLAWYQQK	gi|40748186	1736.85	869.424	2	156.2	15	0	Unmodified	0	0	0	746230	0	0	0	0	0	0	0	0	0	0	0	0	0	0	0	0	0	0	0	0	0	0	0	0	By matching	By matching	By matching	By MS/MS	By matching	By matching	By matching	By matching	By matching	By matching	By matching	By matching	By matching
ATQSVSNNLAWYQQKPGQAPR	gi|40748186	2343.17	782.057	3	52.52	21	1	Unmodified	0	99608	0	1430300	0	0	0	0	0	0	0	0	0	219680	0	0	0	0	0	0	0	0	0	0	0	0	0	0	By matching	By matching	By matching	By MS/MS	By matching	By matching	By matching	By matching	By matching	By matching	By matching	By matching	By matching
ATSTRCATPVASCSGQTR	gi|221039786	1909.87	955.937	2	89.311	18	1	Unmodified	139830000	128550000	87180000	289010000	123560000	113980000	59842000	50870000	114000000	95759000	41800000	41645000	56125000	101650000	21239000	21914000	36465000	13341000	20038000	7929800	30862000	31369000	47531000	0	35106000	0	12983000	18841000	By matching	By matching	By matching	By matching	By matching	By matching	By matching	By matching	By matching	By MS/MS	By MS/MS	By matching	By matching
AVQLEQSGAEVK	gi|1498536	1257.66	629.828	2	122.34	12	0	Unmodified	585750	74467	123010	0	91292	181900	0	109480	132870	243610	0	0	87585	114240	121360	121310	51024	45510	94131	0	82903	35118	123860	175800	23373	122050	43523	0	By MS/MS	By matching	By matching	By matching	By matching	By matching	By matching	By matching	By matching	By MS/MS	By matching	By matching	By matching
AVQLLESGGGLVQPGGSLR	gi|123854	1837.01	919.503	2	159.4	19	0	Unmodified	0	763500	0	506340	2427900	816470	0	0	0	259140	450910	568070	577270	0	0	0	1680600	639580	14027000	234560	538340	1370000	0	0	0	1381100	555820	0	By matching	By matching	By matching	By matching	By MS/MS	By matching	By matching	By matching	By matching	By matching	By matching	By matching	By matching
AVQLVESGGAVVQPGGSLR	gi|371448242	1822.99	912.495	2	107.41	19	0	Unmodified	0	5486700	0	0	0	0	0	0	1392400	0	0	0	0	0	0	0	0	0	0	0	0	0	0	0	0	0	0	0	By matching	By MS/MS	By matching	By matching	By matching	By matching	By matching	By matching	By MS/MS	By matching	By matching	By matching	By matching
AVQLVESGGGLAQPGGSLR	gi|3004764	1794.96	898.479	2	81.157	19	0	Unmodified	0	670560	0	0	0	0	0	0	0	0	0	0	0	0	0	0	0	0	0	0	0	0	0	0	0	0	0	0	By matching	By MS/MS	By matching	By matching	By matching	By matching	By matching	By matching	By matching	By matching	By matching	By matching	By matching
AVQLVESGGGLIQPGGSLR	gi|519673574	1837.01	919.503	2	117.55	19	0	Unmodified	0	0	0	0	0	0	0	0	0	0	0	0	0	0	0	0	0	0	0	0	0	0	0	0	0	1957900	0	0	By matching	By matching	By matching	By matching	By matching	By matching	By matching	By matching	By matching	By matching	By matching	By matching	By matching
AVQLVESGGGLVKPGGSLR	gi|930624918	1823.03	912.513	2	122.49	19	1	Unmodified	442880	286610	627730	289760	518200	375240	228920	312710	636790	719570	294360	0	0	360340	256650	539900	460620	203560	0	167170	279970	111850	184510	225580	0	389000	230790	0	By matching	By matching	By MS/MS	By matching	By matching	By matching	By matching	By matching	By matching	By matching	By matching	By matching	By matching
AVQLVESGGGLVQPGGSLR	gi|630868430	1822.99	912.495	2	186.89	19	0	Unmodified	806750	5486700	414260	803460	622410	0	741190	0	1392400	709060	519950	0	0	2254300	480620	738090	0	0	0	396740	403050	842980	518890	620980	439180	745230	0	0	By MS/MS	By MS/MS	By matching	By MS/MS	By matching	By matching	By MS/MS	By matching	By MS/MS	By matching	By matching	By matching	By matching
AVQLVESGGGLVQPGR	gi|371448368	1565.85	783.926	2	84.046	16	0	Unmodified	0	137530	0	0	0	0	0	0	0	0	175760	219960	337580	0	0	0	0	0	316540	0	0	0	0	976880	0	0	609870	0	By matching	By matching	By matching	By matching	By matching	By matching	By matching	By matching	By matching	By matching	By matching	By matching	By matching
AVQMVESGGGVVRPGGSLR	gi|9663169	1854.97	928.487	2	96.805	19	1	Acetyl (Protein N-term);Oxidation (M)	931930	0	704230	484480	1418400	792560	0	911460	1166600	1550000	812360	0	1007000	0	0	1058300	1225300	825070	0	0	623420	454850	470170	805330	570490	0	650690	1100000	By MS/MS	By matching	By matching	By matching	By MS/MS	By matching	By matching	By MS/MS	By matching	By matching	By matching	By matching	By matching
AVQVVESGGGLVQPGGSLR	gi|519672150	1808.97	905.487	2	201.48	19	0	Unmodified	683310	426720	791690	271970	876300	0	1083100	0	657500	1022800	1835400	0	0	2587800	1251700	1095700	4027200	722580	0	0	642370	218920	131470	0	1503700	651700	0	748530	By matching	By matching	By MS/MS	By matching	By matching	By matching	By MS/MS	By matching	By matching	By MS/MS	By MS/MS	By matching	By matching
AWGQGTLVTVSSASTK	gi|39938110	1591.82	796.91	2	185.86	16	0	Unmodified	0	0	0	0	0	0	1356200	0	308710	237700	0	0	0	0	0	0	0	0	0	0	0	0	0	145040	0	0	464540	0	By matching	By matching	By matching	By matching	By matching	By matching	By MS/MS	By matching	By matching	By matching	By matching	By matching	By matching
AWLNWVR	gi|323431798	943.503	472.751	2	128.75	7	0	Unmodified	0	0	463010	0	0	0	0	0	0	0	0	0	0	0	0	0	0	0	0	0	0	0	0	0	0	0	0	0	By matching	By matching	By MS/MS	By matching	By matching	By matching	By matching	By matching	By matching	By matching	By matching	By matching	By matching
AWLSWVR	gi|519673854	916.492	459.246	2	128.48	7	0	Unmodified	0	0	0	0	0	0	0	0	0	0	0	0	0	0	0	0	0	0	0	0	0	0	0	0	67407	0	884600	0	By matching	By matching	By matching	By matching	By matching	By matching	By matching	By matching	By matching	By matching	By matching	By matching	By matching
AWMNWVR	gi|371447563	961.459	481.73	2	81.381	7	0	Unmodified	0	0	143260	0	0	266340	0	0	0	0	0	0	0	0	0	0	0	0	0	0	0	0	0	0	0	0	0	0	By matching	By matching	By matching	By matching	By matching	By MS/MS	By matching	By matching	By matching	By matching	By matching	By matching	By matching
AYELTQPPSVSVSPGQTAR	gi|821350558	1987	994.501	2	178.71	19	0	Unmodified	909690	1402900	881850	2727200	0	0	1173900	0	0	1734800	1118800	1191600	1316200	1679000	2670100	1240100	2005600	1304800	2853800	1653600	1345600	539880	534230	589620	647900	3108500	1854600	889460	By MS/MS	By MS/MS	By MS/MS	By MS/MS	By matching	By matching	By MS/MS	By matching	By matching	By MS/MS	By MS/MS	By MS/MS	By MS/MS
AYGGTAEYAASVK	gi|270053078	1286.61	644.307	2	82.774	13	0	Unmodified	0	0	0	0	0	1233500	0	558070	118520	0	27399	0	79333	0	0	0	0	0	0	44215	188550	0	0	0	0	0	0	0	By matching	By matching	By matching	By matching	By matching	By MS/MS	By matching	By MS/MS	By matching	By matching	By matching	By matching	By matching
AYGGTTEYAASVK	gi|371448288	1316.62	659.312	2	101.56	13	0	Unmodified	0	0	0	0	0	0	0	69312	0	0	0	0	0	0	0	0	0	0	1414000	0	0	0	0	0	0	0	0	0	By matching	By matching	By matching	By matching	By matching	By matching	By matching	By matching	By matching	By matching	By matching	By matching	By matching
AYGGTTQYAASVK	gi|371447861	1315.64	658.82	2	135.04	13	0	Unmodified	0	0	883480	0	0	0	0	0	0	0	0	0	0	0	0	0	0	0	0	0	0	0	0	0	0	0	0	0	By matching	By matching	By MS/MS	By matching	By matching	By matching	By matching	By matching	By matching	By matching	By matching	By matching	By matching
AYLAWYQQK	gi|61970173	1169.59	585.793	2	130.22	9	0	Unmodified	0	0	0	1349600	0	0	0	0	0	0	0	0	0	0	0	0	0	0	0	0	528750	0	0	0	0	0	0	0	By matching	By matching	By matching	By MS/MS	By matching	By matching	By matching	By matching	By matching	By matching	By matching	By matching	By matching
AYYWSWIR	gi|356668337	1143.55	572.775	2	95.531	8	0	Unmodified	0	0	0	0	0	0	0	0	0	0	0	0	0	0	0	0	0	0	0	0	0	0	0	0	0	0	0	0	By MS/MS	By matching	By matching	By matching	By matching	By matching	By matching	By matching	By matching	By matching	By matching	By matching	By matching
CACVYGFTGPQCERDYR	gi|10732616	2137.88	1069.94	2	93.237	17	1	Unmodified	0	0	0	12694000	526920	0	0	0	0	0	0	0	0	0	0	0	0	0	1070600	0	0	0	0	0	0	0	0	0	By matching	By matching	By matching	By MS/MS	By matching	By matching	By matching	By matching	By matching	By matching	By matching	By matching	By matching
CCVECPPCPAPPVAGPSVFLFPPKPK	gi|34527460	2907.39	970.131	3	133.94	26	1	Unmodified	2666500	2305700	3359000	0	2949400	1441300	0	1776700	2631100	1748900	913850	1023400	1116300	1998300	1228600	1206800	1535800	2218000	1727500	1448300	1587800	933800	1435800	1610900	1467300	2064800	660660	1210000	By MS/MS	By MS/MS	By MS/MS	By matching	By MS/MS	By MS/MS	By matching	By MS/MS	By MS/MS	By MS/MS	By matching	By matching	By MS/MS
CPAPELLGGPSVFLFPPKPK	gi|194376340	2150.16	717.72	3	80.545	20	1	Unmodified	516250	0	342270	262690	410520	0	0	0	0	183560	0	0	0	0	0	0	0	258450	73758	281040	235990	125630	0	0	0	0	74190	0	By MS/MS	By matching	By MS/MS	By matching	By MS/MS	By matching	By matching	By matching	By matching	By matching	By matching	By matching	By matching
DADTAVYYCAR	gi|112694636	1303.55	652.775	2	117.14	11	0	Unmodified	0	0	0	0	0	0	0	0	0	0	0	0	0	0	0	0	0	0	0	0	0	0	0	0	1666300	0	0	0	By matching	By matching	By matching	By matching	By matching	By matching	By matching	By matching	By matching	By matching	By matching	By matching	By matching
DAELVESGGGLVQPGGSLR	gi|31337528	1839.93	920.966	2	102.47	19	0	Unmodified	0	0	0	0	0	0	0	0	0	0	0	0	0	0	0	0	0	0	0	0	0	0	0	0	0	0	0	0	By matching	By matching	By matching	By matching	By matching	By matching	By matching	By matching	By matching	By MS/MS	By matching	By matching	By matching
DAKLVESGGGLVR	gi|371445895	1299.71	650.857	2	122.33	13	1	Acetyl (Protein N-term)	0	0	0	0	0	0	0	0	0	0	0	0	0	0	774260	0	0	0	0	0	0	0	0	0	0	0	0	0	By matching	By matching	By matching	By matching	By matching	By matching	By matching	By matching	By matching	By matching	By matching	By matching	By matching
DAKLVESGGGLVRPGGSLR	gi|371445895	1867.03	623.343	3	79.471	19	2	Acetyl (Protein N-term)	0	0	0	0	0	0	0	0	0	0	0	0	0	0	0	815550	0	0	0	0	0	0	0	0	0	471550	0	372580	By matching	By matching	By matching	By matching	By matching	By matching	By matching	By matching	By matching	By matching	By matching	By matching	By matching
DASGVTFTWTPSSGK	gi|14042015	1539.72	770.86	2	107.74	15	0	Unmodified	0	0	0	0	0	0	0	0	0	0	0	0	0	0	223490	375520	225060	0	173100	0	216750	82873	0	0	0	183290	0	310840	By matching	By matching	By matching	By matching	By matching	By matching	By matching	By matching	By matching	By matching	By MS/MS	By matching	By matching
DCHLAQVPSHTVVAR	gi|49258810	1688.84	845.421	2	93.478	15	0	Unmodified	0	0	95079	0	0	0	0	0	224290	265440	0	0	0	0	233640	0	158770	0	107180	89835	136980	0	81675	131250	142750	0	0	0	By matching	By matching	By matching	By matching	By matching	By matching	By matching	By matching	By matching	By MS/MS	By matching	By matching	By matching
DDDTAIYYCAK	gi|112695392	1333.55	667.775	2	98.898	11	0	Unmodified	0	0	0	0	0	0	0	0	0	0	0	0	0	0	0	0	0	0	0	0	353000	0	0	0	0	0	0	0	By matching	By matching	By matching	By matching	By matching	By matching	By matching	By matching	By matching	By matching	By matching	By matching	By matching
DDDTAVYYCAR	gi|695943127	1347.54	674.77	2	201.75	11	0	Unmodified	0	999990	0	239430	0	0	0	0	0	0	0	0	0	0	0	0	0	0	0	0	0	0	0	0	504520	0	0	0	By matching	By MS/MS	By matching	By matching	By matching	By matching	By matching	By matching	By matching	By matching	By matching	By matching	By matching
DDLGWYQQKPGK	gi|63102909	1433.69	717.847	2	110.08	12	1	Unmodified	0	288210	0	257880	990690	166770	114080	0	0	286340	0	287110	0	694970	0	0	0	0	0	172830	237460	99927	81942	0	154910	224490	0	352060	By matching	By matching	By matching	By matching	By MS/MS	By matching	By matching	By matching	By matching	By matching	By matching	By matching	By matching
DDYWGQGTLVTVSSASTK	gi|4323682	1913.9	957.95	2	147.64	18	0	Unmodified	0	0	0	0	0	0	0	0	0	0	0	3247600	0	0	0	0	0	0	0	0	0	0	0	0	0	0	0	0	By matching	By matching	By matching	By matching	By matching	By matching	By matching	By matching	By matching	By matching	By matching	By MS/MS	By matching
DEDTAVYYCAR	gi|194376288	1361.56	681.778	2	131.83	11	0	Unmodified	0	986100	0	0	0	0	0	0	0	0	0	0	0	0	0	0	0	0	0	0	0	0	0	1255400	0	0	0	0	By matching	By MS/MS	By matching	By matching	By matching	By matching	By matching	By matching	By matching	By matching	By matching	By matching	By matching
DEQLLESGGGVVQPGGSLR	gi|247424311	1896.95	949.477	2	107.98	19	0	Unmodified	0	0	0	0	0	0	0	0	0	1349500	361600	1144900	0	0	0	0	506770	0	0	0	906530	444960	0	0	0	0	1312200	0	By matching	By matching	By matching	By matching	By matching	By matching	By matching	By matching	By matching	By MS/MS	By matching	By matching	By matching
DEQLVESGGGLVKPGGSLR	gi|519672400	1896.99	949.495	2	120.08	19	1	Unmodified	481370	0	5348900	0	11684000	4654400	0	0	0	0	0	0	0	0	0	0	0	0	0	0	0	0	0	0	0	0	0	0	By MS/MS	By matching	By MS/MS	By matching	By MS/MS	By MS/MS	By matching	By matching	By matching	By matching	By matching	By matching	By matching
DFSIHWVR	gi|491668601	1058.53	530.265	2	96.492	8	0	Unmodified	0	0	0	0	0	0	0	0	0	0	0	0	0	0	0	0	0	0	0	0	471170	0	0	0	0	0	0	0	By matching	By matching	By matching	By matching	By matching	By matching	By matching	By matching	By matching	By matching	By matching	By matching	By matching
DFVMTQSPDSLAVSLGER	gi|662564295	1950.94	976.468	2	148.52	18	0	Unmodified	0	265280	0	377930	766960	541170	0	0	759820	0	0	0	0	485260	0	0	0	0	0	0	0	0	0	0	0	0	0	0	By matching	By matching	By matching	By matching	By MS/MS	By matching	By matching	By matching	By matching	By matching	By matching	By matching	By matching
DGGSLSSWGQGTLVTVSSASTK	gi|304563918	2124.03	1063.02	2	103.92	22	0	Unmodified	0	0	0	0	0	0	0	0	638670	0	0	0	0	0	0	0	0	0	0	0	0	0	0	0	0	0	0	0	By matching	By matching	By matching	By matching	By matching	By matching	By matching	By matching	By MS/MS	By matching	By matching	By matching	By matching
DGNTYLNWFQQR	gi|75707333	1540.71	771.353	2	155.33	12	0	Unmodified	934350	464800	201820	0	0	131040	310320	515940	340370	112320	250990	0	406560	1070000	0	0	0	0	181540	0	0	0	58400	0	0	0	0	236190	By MS/MS	By matching	By matching	By matching	By matching	By matching	By matching	By MS/MS	By matching	By matching	By matching	By matching	By matching
DGNTYLSWLQQRPGQPPR	gi|696826147	2112.05	705.017	3	98.676	18	1	Unmodified	0	0	0	0	0	0	399080	279410	669320	295210	1283700	0	503280	0	0	198680	0	0	684720	0	0	0	0	0	0	0	0	0	By matching	By matching	By matching	By matching	By matching	By matching	By matching	By matching	By MS/MS	By matching	By MS/MS	By matching	By matching
DGSETHYVDSVK	gi|118405803	1335.59	668.797	2	93.345	12	0	Unmodified	0	0	0	0	0	0	0	0	0	165860	0	0	0	119050	0	0	0	0	0	0	0	0	0	0	0	0	0	0	By matching	By matching	By matching	By matching	By matching	By matching	By matching	By matching	By matching	By MS/MS	By matching	By matching	By matching
DGYYWTWIR	gi|404248832	1258.58	630.289	2	111.06	9	0	Unmodified	0	0	0	0	0	1032000	0	219950	0	0	0	0	0	0	0	0	0	0	0	0	0	0	0	0	0	0	0	0	By matching	By matching	By matching	By matching	By matching	By MS/MS	By matching	By MS/MS	By matching	By matching	By matching	By matching	By matching
DHYGDHIDYWGQGTLVTVSSASTK	gi|323430455	2636.21	879.738	3	55.208	24	0	Unmodified	0	0	0	0	0	1600700	0	0	0	0	0	0	0	0	0	0	0	0	0	0	0	0	0	0	0	0	0	0	By matching	By matching	By matching	By matching	By matching	By MS/MS	By matching	By matching	By matching	By matching	By matching	By matching	By matching
DIAFLDLSGLR	gi|524845727	1218.66	610.33	2	90.05	11	0	Unmodified	0	0	0	0	0	0	0	0	0	0	0	0	0	0	0	0	0	0	0	0	0	0	5404200	0	0	0	0	0	By matching	By matching	By matching	By matching	By matching	By matching	By matching	By matching	By matching	By matching	By matching	By matching	By matching
DIELTQSPDSLAVSLGER	gi|218783336	1928.97	965.485	2	84.208	18	0	Unmodified	0	0	0	0	0	0	0	0	0	0	0	0	0	0	0	0	729560	0	0	0	0	0	0	0	0	0	0	0	By matching	By matching	By matching	By matching	By matching	By matching	By matching	By matching	By matching	By matching	By matching	By matching	By matching
DIELTQSPGTLSLSPGER	gi|11275326	1898.96	950.479	2	185.28	18	0	Unmodified	0	348040	0	0	1047800	318200	375340	403120	649580	381520	482940	281390	0	502850	0	434290	0	0	0	0	594410	0	0	0	0	0	0	3458600	By matching	By matching	By matching	By matching	By MS/MS	By matching	By matching	By matching	By matching	By matching	By matching	By matching	By matching
DIEMTQSPSTLSASVGDR	gi|114385582	1892.88	947.439	2	162.37	18	0	Acetyl (Protein N-term)	579420	657970	393940	0	834820	732780	795540	905790	0	885610	1084600	875620	1022000	1283400	0	738170	0	0	0	0	797580	488480	835010	895660	393980	1459000	0	0	By matching	By MS/MS	By matching	By matching	By MS/MS	By matching	By MS/MS	By MS/MS	By matching	By MS/MS	By MS/MS	By matching	By MS/MS
DILLTQSPAILSVSPGER	gi|471270576	1895.04	948.518	2	98.882	18	0	Unmodified	0	0	0	0	0	0	0	0	0	0	0	0	0	0	0	505870	0	0	0	0	0	0	0	0	0	0	0	379370	By matching	By matching	By matching	By matching	By matching	By matching	By matching	By matching	By matching	By matching	By matching	By matching	By matching
DIQLLESGGGLGQPGGSLR	gi|371446578	1852.96	927.482	2	158.53	19	0	Unmodified	0	2764100	583750	502690	123630	1145800	0	464810	0	0	0	0	0	0	0	0	0	0	448960	484010	0	1054000	534240	368930	0	623990	0	0	By matching	By MS/MS	By matching	By matching	By matching	By MS/MS	By matching	By matching	By matching	By matching	By matching	By matching	By matching
DIQLTQSPSFLSASVGDR	gi|316925485	1919.96	960.979	2	281.96	18	0	Unmodified	6160800	0	335710	0	0	423030	6795000	6131200	0	6167700	13798000	7484300	10889000	15732000	8825900	8287800	7878200	2149200	406820	589170	10009000	3906200	3662100	7218600	1998800	0	3856100	9464900	By MS/MS	By matching	By matching	By matching	By matching	By matching	By MS/MS	By MS/MS	By matching	By MS/MS	By MS/MS	By MS/MS	By MS/MS
DIQLTQSPSSLSASLGDR	gi|58222730	1873.94	937.969	2	193.47	18	0	Unmodified	456960	0	1346400	0	167760	0	131070	0	1617100	864600	361010	0	0	341670	0	516430	0	133230	584670	954730	479920	370070	0	0	0	0	0	1094900	By MS/MS	By matching	By MS/MS	By matching	By matching	By matching	By matching	By matching	By MS/MS	By MS/MS	By matching	By matching	By matching
DIQLTQSPSSLSASVGDR	gi|405945039	1859.92	930.961	2	292.35	18	0	Unmodified	3155800	1492900	3266200	4519100	4826900	5128100	2375100	1502200	9393300	3272200	3715700	3416800	1765300	5231400	3869400	3485200	3569000	3619100	3111600	4227800	3128400	2295700	2080300	4040800	2028100	5943900	6376100	4302000	By MS/MS	By MS/MS	By MS/MS	By MS/MS	By MS/MS	By MS/MS	By MS/MS	By MS/MS	By MS/MS	By MS/MS	By MS/MS	By MS/MS	By MS/MS
DIQLTQSPSSVSASVGDR	gi|33235616	1845.91	923.953	2	159.18	18	0	Unmodified	92687	0	1604300	0	0	0	0	0	0	0	0	0	1014500	0	0	0	0	0	0	0	0	0	0	0	0	0	0	0	By matching	By matching	By MS/MS	By matching	By matching	By matching	By matching	By matching	By matching	By matching	By matching	By matching	By MS/MS
DIQLTQSPSTLSASVGDR	gi|27531086	1873.94	937.969	2	251.74	18	0	Unmodified	1586100	1636400	1541200	0	1230300	1694100	1671900	3854100	3065000	1834200	1644500	966840	1641700	1672500	3454800	884150	1154500	1730100	1057300	2098600	1053900	692160	1286800	2229900	1757500	937710	566460	891890	By MS/MS	By MS/MS	By MS/MS	By matching	By MS/MS	By MS/MS	By MS/MS	By MS/MS	By MS/MS	By MS/MS	By MS/MS	By MS/MS	By MS/MS
DIQLTQSPSTVSASVGDR	gi|630868811	1859.92	930.961	2	238.19	18	0	Unmodified	299700	2138800	3266200	186750	906020	304160	287970	1502200	446910	349830	458560	418510	2085700	5766000	3869400	4191800	1476900	3997900	0	4227800	181220	2487700	2453500	565590	0	1527100	0	0	By matching	By MS/MS	By MS/MS	By matching	By matching	By matching	By matching	By MS/MS	By matching	By matching	By matching	By matching	By MS/MS
DIQLTQSPVSLSLSPGER	gi|345786385	1926.01	964.003	2	69.935	18	0	Unmodified	0	0	0	471800	0	0	0	0	0	0	0	0	153180	0	552160	156290	0	1379000	0	1869900	0	0	0	0	0	0	170070	0	By matching	By matching	By matching	By matching	By matching	By matching	By matching	By matching	By matching	By matching	By matching	By matching	By matching
DIQLVESGGGLVQPGGSLR	gi|519673744	1881	941.498	2	312.9	19	0	Unmodified	0	132400000	5457900	0	91115000	0	266190	292320	0	106660000	7822400	0	0	0	4128300	439210	88912000	0	5277900	719010	0	0	0	0	4714500	79465000	0	0	By matching	By MS/MS	By MS/MS	By matching	By MS/MS	By matching	By matching	By matching	By matching	By MS/MS	By MS/MS	By matching	By matching
DIQMNQSPSTLSASVGDR	gi|98956350	1904.89	953.445	2	152.32	18	0	Oxidation (M)	2330600	1482400	2321000	822330	3135900	3157200	3243100	3062300	5323700	2613100	4219700	4063200	2773500	5173300	4602700	3642100	3905900	4386300	4076500	4195900	3452400	2430800	2019000	5617100	2178500	4689900	3781800	4622400	By MS/MS	By MS/MS	By MS/MS	By MS/MS	By MS/MS	By MS/MS	By MS/MS	By MS/MS	By MS/MS	By MS/MS	By MS/MS	By MS/MS	By MS/MS
DIQMTQFPSALSASVGDR	gi|662564942	1921.92	961.96	2	95.409	18	0	Unmodified	0	0	0	486500	0	0	0	0	0	0	0	0	0	0	0	0	0	0	0	0	0	0	0	0	0	0	0	0	By matching	By matching	By matching	By MS/MS	By matching	By matching	By matching	By matching	By matching	By matching	By matching	By matching	By matching
DIQMTQSLSTLSASVGDR	gi|695942554	1907.93	954.963	2	129.42	18	0	Oxidation (M)	0	0	0	0	0	0	0	0	0	0	0	1763300	0	0	0	0	0	0	0	0	0	0	0	0	0	0	0	0	By matching	By matching	By matching	By matching	By matching	By matching	By matching	By matching	By matching	By matching	By matching	By MS/MS	By matching
DIQMTQSPLSLPVTLGQPASISCR	gi|316925589	2598.31	1300.16	2	87.72	24	0	Unmodified	0	0	0	0	0	0	0	0	0	0	0	0	346010	0	0	0	0	0	0	0	0	0	0	0	0	826670	0	805590	By matching	By matching	By matching	By matching	By matching	By matching	By matching	By matching	By matching	By matching	By matching	By matching	By matching
DIQMTQSPLSVSVSVGDR	gi|300498350	1917.95	959.973	2	82.709	18	0	Unmodified	0	0	0	1261200	0	0	0	0	0	280310	0	0	0	0	0	0	0	0	0	0	0	0	0	0	0	0	0	0	By matching	By matching	By matching	By MS/MS	By matching	By matching	By matching	By matching	By matching	By matching	By matching	By matching	By matching
DIQMTQSPPSLSASVGDR	gi|170684460	1887.9	944.95	2	158.15	18	0	Unmodified	0	0	0	4236700	641580	462500	246860	74038	0	194760	0	0	0	0	0	0	416140	0	0	0	0	0	0	0	0	0	0	0	By matching	By matching	By matching	By MS/MS	By matching	By MS/MS	By matching	By matching	By matching	By matching	By matching	By matching	By matching
DIQMTQSPSFLAASVGDR	gi|346722572	1921.92	961.96	2	139.74	18	0	Unmodified	0	0	0	486500	0	0	0	0	0	0	0	0	0	0	0	0	0	0	0	0	0	0	0	0	0	0	0	0	By matching	By matching	By matching	By MS/MS	By matching	By matching	By matching	By matching	By matching	By matching	By matching	By matching	By matching
DIQMTQSPSSLAASVGDR	gi|695943183	1861.88	931.942	2	133.24	18	0	Unmodified	0	0	0	523640	215100	138430	0	0	305250	0	0	0	0	0	0	0	0	0	0	0	0	0	0	0	0	0	0	0	By matching	By matching	By matching	By MS/MS	By matching	By matching	By matching	By matching	By matching	By matching	By matching	By matching	By matching
DIQMTQSPSSLSASLGDR	gi|538261331	1891.89	946.947	2	128.66	18	0	Unmodified	913740	550870	447960	0	1102300	250480	158170	134710	1893400	527930	474000	244250	221770	1015900	0	0	0	0	130250	360910	189070	225870	291160	0	0	0	0	0	By MS/MS	By matching	By MS/MS	By matching	By MS/MS	By matching	By matching	By matching	By MS/MS	By matching	By matching	By matching	By matching
DIQMTQSPSSLSASVGDK	gi|170684574	1849.87	925.936	2	178.1	18	0	Unmodified	209850	0	0	1887000	0	0	0	0	274000	0	0	0	0	0	0	0	0	0	0	0	0	0	0	0	0	0	0	0	By matching	By matching	By matching	By MS/MS	By matching	By matching	By matching	By matching	By matching	By matching	By matching	By matching	By matching
DIQMTQSPSSLSSSVGDR	gi|695942937	1893.87	947.937	2	85.054	18	0	Unmodified	0	0	0	0	0	0	0	0	0	0	0	0	0	0	0	0	0	0	0	0	1377500	0	0	0	0	0	0	0	By matching	By matching	By matching	By matching	By matching	By matching	By matching	By matching	By matching	By matching	By matching	By matching	By matching
DIQMTQSPSSLTASVGDR	gi|29725730	1891.89	946.947	2	220.1	18	0	Unmodified	0	0	2552400	0	0	0	0	0	0	0	0	0	0	0	0	0	0	0	0	0	0	0	0	0	0	0	525750	0	By matching	By matching	By MS/MS	By matching	By matching	By matching	By matching	By matching	By matching	By matching	By matching	By matching	By matching
DIQMTQSPSSVSASVGDR	gi|820957471	1863.86	932.932	2	300.25	18	0	Unmodified	1138000	1045800	1414400	12432000	4520900	2894900	820260	666530	3543300	888980	1015100	744470	921840	2234200	447040	0	349560	750940	245630	464990	375270	510860	984670	0	98772	360340	309970	266210	By MS/MS	By MS/MS	By MS/MS	By MS/MS	By MS/MS	By MS/MS	By matching	By MS/MS	By MS/MS	By MS/MS	By MS/MS	By MS/MS	By MS/MS
DIQMTQSPSTLSASVGDR	gi|442828	1891.89	946.947	2	310.55	18	0	Unmodified	4040800	7792200	2552400	40048000	9344600	5340200	2731500	1895600	12728000	3163000	2385100	1703800	3188900	8847500	958110	955600	1644200	1140800	0	0	1199800	952630	2260400	0	365610	0	0	1038200	By MS/MS	By MS/MS	By MS/MS	By MS/MS	By MS/MS	By MS/MS	By MS/MS	By MS/MS	By MS/MS	By MS/MS	By MS/MS	By MS/MS	By MS/MS
DIQMTQSPTSLSASVGDR	gi|662564681	1891.89	946.947	2	221.79	18	0	Unmodified	0	6784400	0	0	0	0	0	0	0	0	2385100	0	0	8847500	958110	955600	1644200	0	1262000	2045300	1199800	0	0	847190	0	941150	0	1038200	By matching	By MS/MS	By matching	By matching	By matching	By matching	By matching	By matching	By matching	By matching	By MS/MS	By matching	By matching
DIQVTQSPSSLSASVGDR	gi|377656586	1845.91	923.953	2	223.76	18	0	Unmodified	1781400	1073600	1604300	5173700	2912100	2302500	795710	717360	5006900	1234500	1786000	1924800	1014500	2096200	2348900	2003100	2158800	2021700	1716000	1257600	1129800	1032600	1055200	3167800	687170	1695800	939660	1299300	By MS/MS	By MS/MS	By MS/MS	By MS/MS	By MS/MS	By MS/MS	By MS/MS	By MS/MS	By MS/MS	By MS/MS	By MS/MS	By MS/MS	By MS/MS
DIRLTQSPATLSVSPGER	gi|163931323	1926.02	964.009	2	110.32	18	1	Unmodified	0	0	0	0	0	0	0	0	0	0	0	0	0	0	0	181660	0	0	0	907990	0	0	289610	0	0	0	0	391800	By matching	By matching	By matching	By matching	By matching	By matching	By matching	By matching	By matching	By matching	By matching	By matching	By matching
DISNYLNWYQQKPGK	gi|21669433	1852.91	927.455	2	131.08	15	1	Unmodified	0	0	0	0	0	0	0	0	0	0	0	0	0	207280	0	0	0	1489300	0	0	0	0	0	0	0	0	0	0	By matching	By matching	By matching	By matching	By matching	By matching	By matching	By matching	By matching	By matching	By matching	By matching	By matching
DIVLTQSPATLSLSPGER	gi|914685198	1883	942.5	2	219.95	18	0	Unmodified	0	0	0	0	0	0	0	0	21148000	0	0	0	0	0	0	0	0	0	0	8770900	0	16640000	5431600	0	0	8499100	0	0	By matching	By matching	By matching	By matching	By matching	By matching	By matching	By matching	By MS/MS	By matching	By matching	By matching	By matching
DIVLTQSPATLSVSPGER	gi|20150130	1868.98	935.492	2	123.63	18	0	Unmodified	738380	0	0	0	0	0	0	0	0	0	0	0	0	0	0	0	0	0	1159500	0	0	0	0	0	0	0	0	0	By MS/MS	By matching	By matching	By matching	By matching	By matching	By matching	By matching	By matching	By matching	By matching	By matching	By matching
DIVLTQSPDFLAVSLGER	gi|7438709	1959.03	980.516	2	201.18	18	0	Unmodified	0	0	0	0	0	0	0	0	0	0	0	0	0	0	0	0	0	0	0	745190	0	0	0	0	0	0	0	0	By matching	By matching	By matching	By matching	By matching	By matching	By matching	By matching	By matching	By matching	By matching	By matching	By matching
DIVLTQSPDSLAVSLGER	gi|13096223	1898.99	950.497	2	248.7	18	0	Unmodified	2520900	2082300	4500900	2078900	6732900	4624000	2640400	1359100	5732600	4334000	4139600	2077900	1427600	4893200	2442800	3393900	3309500	1220100	2643500	2922000	972590	1010200	467490	1583500	1027700	2179900	594130	1285200	By MS/MS	By MS/MS	By MS/MS	By MS/MS	By MS/MS	By MS/MS	By MS/MS	By MS/MS	By MS/MS	By MS/MS	By MS/MS	By MS/MS	By MS/MS
DIVLTQSPDTLAVSLGER	gi|662564324	1913.01	957.505	2	181.86	18	0	Unmodified	130150	0	0	0	0	0	494580	0	1140800	0	0	0	0	0	0	414020	0	0	0	0	0	0	0	0	0	0	0	0	By matching	By matching	By matching	By matching	By matching	By matching	By matching	By matching	By MS/MS	By matching	By matching	By matching	By matching
DIVLTQSPGTLSLSPGDR	gi|340764280	1854.97	928.484	2	145.43	18	0	Unmodified	1722300	0	150550	0	0	0	1106700	0	4248900	0	543060	2022400	0	0	1343200	581220	0	0	0	0	0	803580	1569500	0	2622400	240350	2441300	0	By MS/MS	By matching	By matching	By matching	By matching	By matching	By matching	By matching	By MS/MS	By matching	By matching	By MS/MS	By matching
DIVLTQSPGTLSLSPGER	gi|910277286	1868.98	935.492	2	321.68	18	0	Unmodified	0	0	0	22008000	0	6836000	0	0	0	0	9047200	0	0	9744800	0	0	0	9918600	0	11684000	0	5545000	6028500	0	16272000	0	0	0	By matching	By matching	By matching	By MS/MS	By matching	By matching	By matching	By matching	By matching	By matching	By matching	By matching	By matching
DIVLTQSPLSLPVTPGEPASISCR	gi|125786	2536.32	1269.16	2	148.2	24	0	Unmodified	355080	686530	2409200	1781600	1171800	1151900	659230	662800	1440800	769600	1346900	915730	1028100	1304000	831660	0	1352800	663730	1922600	928850	1224200	483560	735960	1356400	441570	2872100	459000	1141100	By matching	By matching	By MS/MS	By MS/MS	By MS/MS	By MS/MS	By matching	By matching	By matching	By matching	By matching	By matching	By MS/MS
DIVLTQTPLSLSVTPGQPASISCK	gi|700652654	2511.33	1256.66	2	101.85	24	0	Unmodified	0	0	0	0	0	0	0	0	0	0	0	0	0	1290800	0	0	0	0	0	0	0	0	0	0	0	0	0	0	By matching	By matching	By matching	By matching	By matching	By matching	By matching	By matching	By matching	By matching	By matching	By matching	By matching
DIVMTQSPATLSLSPGER	gi|7012705	1900.96	951.478	2	147.1	18	0	Unmodified	0	0	0	1153000	0	171180	0	0	0	0	0	0	0	0	0	0	0	0	0	0	0	0	0	0	0	271750	0	0	By matching	By matching	By matching	By MS/MS	By matching	By matching	By matching	By matching	By matching	By matching	By matching	By matching	By matching
DIVMTQSPATLSVSPGER	gi|910751188	1886.94	944.47	2	166.47	18	0	Unmodified	1258200	0	0	0	0	0	0	0	0	0	0	0	0	0	0	0	0	0	0	0	0	0	0	0	0	0	0	0	By MS/MS	By matching	By matching	By matching	By matching	By matching	By matching	By matching	By matching	By matching	By matching	By matching	By matching
DIVMTQSPATLSVTPGDR	gi|197725196	1886.94	944.47	2	154.39	18	0	Unmodified	0	0	0	0	0	0	0	0	0	0	0	0	439670	1068400	264960	0	0	0	0	0	0	0	0	0	0	0	0	118510	By matching	By matching	By matching	By matching	By matching	By matching	By matching	By matching	By matching	By matching	By matching	By matching	By MS/MS
DIVMTQSPDSLAVSLGER	gi|335892418	1916.95	959.476	2	295.16	18	0	Unmodified	11696000	22524000	1414800	4006200	37676000	25604000	15824000	7221000	44748000	12871000	15290000	4874300	12207000	28405000	3760400	2035800	4898200	1729400	5883200	7727500	5338800	7009000	2751200	2359200	1514300	3758800	2573500	2290100	By MS/MS	By MS/MS	By MS/MS	By MS/MS	By MS/MS	By MS/MS	By MS/MS	By MS/MS	By MS/MS	By MS/MS	By MS/MS	By MS/MS	By MS/MS
DIVMTQSPDSLAVSPGER	gi|13399508	1900.92	951.46	2	200.99	18	0	Unmodified	0	0	0	5992600	0	0	0	0	0	0	0	0	0	0	0	0	0	0	0	0	0	0	0	0	0	297940	93729	0	By matching	By matching	By matching	By MS/MS	By matching	By matching	By matching	By matching	By matching	By matching	By matching	By matching	By matching
DIVMTQSPESLAVSLGER	gi|106620	1930.97	966.484	2	141.6	18	0	Unmodified	574560	513530	962950	1124400	792970	967600	350450	0	1722600	0	243120	0	0	538150	0	227940	0	0	0	0	0	220640	140000	0	0	0	0	0	By MS/MS	By matching	By matching	By MS/MS	By MS/MS	By matching	By matching	By matching	By MS/MS	By matching	By matching	By matching	By matching
DIVMTQSPLSLPVTPGEPASISCR	gi|218783338	2554.28	1278.14	2	221.99	24	0	Unmodified	1678100	5950100	3518600	15104000	9005500	5754200	2576300	1214500	5682800	1724000	4107900	1137500	1884400	3953800	590270	1013600	1855200	769930	1205300	3728900	2437200	1711500	1192100	660270	0	2644100	0	1133600	By MS/MS	By MS/MS	By MS/MS	By MS/MS	By MS/MS	By MS/MS	By MS/MS	By MS/MS	By MS/MS	By MS/MS	By MS/MS	By MS/MS	By MS/MS
DIVMTQSPLSLSATLGQPASISCR	gi|109693231	2531.27	1266.64	2	82.885	24	0	Oxidation (M)	0	0	0	1104700	0	0	0	0	0	0	0	0	0	0	0	0	0	0	0	0	0	0	0	0	0	0	0	0	By matching	By matching	By matching	By MS/MS	By matching	By matching	By matching	By matching	By matching	By matching	By matching	By matching	By matching
DIVMTQSPNSLAVSLGER	gi|229528	1915.97	639.656	3	63.614	18	0	Acetyl (Protein N-term);Oxidation (M)	0	0	2506400	867780	3533000	0	3739900	3032300	5956100	2277700	4773900	3302700	6081900	4110100	2471700	2751100	2720400	1912900	3574400	3331100	0	3007800	1815500	2577900	2079700	0	2536300	1792300	By matching	By matching	By MS/MS	By MS/MS	By MS/MS	By matching	By matching	By matching	By matching	By MS/MS	By MS/MS	By matching	By matching
DIVMTQSPVSLAVSLGER	gi|695942250	1900.99	951.496	2	77.506	18	0	Unmodified	0	115200	452510	111400	0	0	0	0	0	0	0	0	0	0	0	0	0	0	0	0	0	0	0	0	0	0	0	0	By matching	By matching	By MS/MS	By matching	By matching	By matching	By matching	By matching	By matching	By matching	By matching	By matching	By matching
DIVVTQSPDSLAVSLGER	gi|630869339	1884.98	943.49	2	208.52	18	0	Unmodified	1452300	0	0	4452800	2337500	1087100	1682800	0	0	0	3247300	546780	0	1578900	2262700	2206500	0	4347900	1777000	1370900	0	688030	0	1641200	517630	2064900	175880	0	By MS/MS	By matching	By matching	By MS/MS	By MS/MS	By matching	By MS/MS	By matching	By MS/MS	By matching	By MS/MS	By matching	By matching
DIVVTQSPDSLAVSPGER	gi|170684480	1868.95	935.474	2	116.86	18	0	Unmodified	6934800	9093600	6333600	0	11124000	32545000	31117000	9066000	61591000	23955000	31567000	7861700	46925000	33784000	19738000	8024800	8521500	5876900	11516000	8193800	31527000	25621000	16321000	18618000	18776000	23059000	8498000	16927000	By MS/MS	By MS/MS	By MS/MS	By matching	By MS/MS	By MS/MS	By MS/MS	By MS/MS	By MS/MS	By MS/MS	By MS/MS	By MS/MS	By MS/MS
DKYYADSVQGR	gi|49354749	1300.6	651.302	2	108.9	11	1	Unmodified	0	0	0	0	0	0	0	0	0	0	0	0	0	0	0	0	242710	0	0	0	0	0	0	0	0	0	0	0	By matching	By matching	By matching	By matching	By matching	By matching	By matching	By matching	By matching	By matching	By matching	By matching	By matching
DLATVYVDVLK	gi|90108666	1234.68	618.34	2	120.06	11	0	Unmodified	172790	409900	153080	0	320210	220030	276710	363460	180720	662370	215130	194780	0	383460	353540	617770	395520	270240	529650	611030	227270	218290	99028	391100	143630	384100	0	354780	By matching	By MS/MS	By matching	By matching	By matching	By matching	By matching	By MS/MS	By matching	By MS/MS	By matching	By matching	By matching
DLAWYQQKPGQAPR	gi|700652780	1656.84	829.419	2	82.202	14	1	Unmodified	1024300	315940	251030	386060	0	549030	0	0	0	0	0	0	0	0	0	0	0	0	0	0	0	0	299220	0	352040	0	0	0	By matching	By matching	By matching	By matching	By matching	By matching	By matching	By matching	By matching	By matching	By matching	By matching	By matching
DLQLLQSGGGLVQPGGPLR	gi|519674022	1904.05	953.024	2	116.6	19	0	Unmodified	0	0	0	0	0	0	0	0	0	0	0	0	0	0	0	0	0	0	698850	0	0	0	0	0	0	0	0	0	By matching	By matching	By matching	By matching	By matching	By matching	By matching	By matching	By matching	By matching	By matching	By matching	By matching
DLQMTQSPSSLSASVGDR	gi|327410291	1877.88	939.939	2	267.69	18	0	Unmodified	8888400	9195900	11886000	53750000	26193000	19675000	8108000	5302000	37593000	11346000	8834400	6615700	6700700	40629000	5719500	2784000	4980400	4003700	5968800	8536300	4817400	4323100	4019000	3600300	1871200	3476200	3277900	3831700	By MS/MS	By MS/MS	By MS/MS	By MS/MS	By MS/MS	By MS/MS	By MS/MS	By MS/MS	By MS/MS	By MS/MS	By MS/MS	By MS/MS	By MS/MS
DNGYTTEYAASVKGR	gi|47846703	1630.76	816.379	2	195.6	15	1	Unmodified	0	0	0	0	0	0	0	0	0	0	0	0	0	0	0	0	0	0	0	0	0	0	0	0	0	1115700	0	0	By matching	By matching	By matching	By matching	By matching	By matching	By matching	By matching	By matching	By matching	By matching	By matching	By matching
DNSKNTLYLQMNALR	gi|612407287	1779.89	890.947	2	178.67	15	1	Oxidation (M)	0	0	0	0	0	0	0	0	0	0	0	0	1651400	0	0	0	0	0	0	0	0	0	0	0	0	0	0	0	By matching	By matching	By matching	By matching	By matching	By matching	By matching	By matching	By matching	By matching	By matching	By matching	By MS/MS
DNSKNTLYLQMNNLR	gi|49072949	1822.9	912.45	2	113.37	15	1	Oxidation (M)	0	165790	261300	49063	225630	254350	0	0	0	0	0	0	0	0	0	0	225870	0	120180	164620	163770	0	169830	0	0	0	587950	0	By matching	By matching	By matching	By matching	By matching	By matching	By matching	By matching	By matching	By matching	By matching	By matching	By matching
DNSKNTLYLQMNTVR	gi|112700266	1795.89	898.944	2	160.63	15	1	Unmodified	0	0	0	0	2589200	1462800	0	473690	0	0	0	712990	0	0	283260	0	0	0	384080	0	426880	342400	0	0	0	0	0	0	By matching	By matching	By matching	By matching	By MS/MS	By MS/MS	By matching	By matching	By matching	By matching	By matching	By matching	By matching
DNSKNTLYLQMSNLR	gi|519671969	1795.89	898.944	2	108.66	15	1	Unmodified	0	0	0	0	0	0	0	0	1556700	0	1163000	0	0	0	0	0	0	0	0	0	0	0	0	0	0	0	0	0	By matching	By matching	By matching	By matching	By matching	By matching	By matching	By matching	By MS/MS	By matching	By MS/MS	By matching	By matching
DNSQNTLYLKMNSLR	gi|371447969	1795.89	898.944	2	139	15	1	Unmodified	768670	1773600	0	1386600	0	0	0	0	0	374730	0	0	0	0	0	0	383950	0	0	0	0	0	0	0	0	0	0	0	By matching	By MS/MS	By matching	By MS/MS	By matching	By matching	By matching	By matching	By matching	By matching	By matching	By matching	By matching
DNYLFLKEVK	gi|767902040	1267.68	634.841	2	114.89	10	1	Unmodified	49069000	21282000	25680000	97919000	34799000	26561000	69537000	27626000	56706000	27648000	30463000	43854000	34760000	130060000	46794000	20496000	41895000	31160000	17982000	34883000	26540000	20592000	22426000	25034000	13324000	25277000	44761000	22798000	By matching	By matching	By matching	By matching	By matching	By matching	By matching	By matching	By matching	By matching	By matching	By matching	By MS/MS
DPETSMPGRIQISVSPR	gi|767920855	1868.94	935.471	2	89.506	17	1	Unmodified	0	0	0	0	0	0	0	0	0	0	0	0	0	0	0	0	0	0	0	0	9986300	0	0	0	0	0	0	0	By matching	By matching	By matching	By matching	By matching	By matching	By matching	By matching	By matching	By matching	By matching	By matching	By matching
DPIAAGYWGQGTLVTVSSASTK	gi|817599136	2208.11	1105.05	2	74.776	22	0	Unmodified	0	0	0	0	0	0	0	0	0	0	1310900	0	0	0	0	0	0	0	0	0	0	0	0	0	0	0	0	0	By matching	By matching	By matching	By matching	By matching	By matching	By matching	By matching	By matching	By matching	By MS/MS	By matching	By matching
DPLDFWGQGTLVTVSSASTK	gi|304562481	2108.04	1055.02	2	88.471	20	0	Unmodified	0	0	0	0	0	0	0	0	0	0	0	0	0	0	0	0	0	0	0	526520	0	0	0	0	0	0	0	0	By matching	By matching	By matching	By matching	By matching	By matching	By matching	By matching	By matching	By matching	By matching	By matching	By matching
DPRTPPDIVVVVAATSDYGMDVWGQGTTVTVSS	gi|8489281	3419.66	1140.89	3	42.922	33	1	Oxidation (M)	0	0	0	0	0	0	0	0	0	0	0	0	5216600	0	0	0	0	0	0	0	0	0	0	0	0	0	0	0	By matching	By matching	By matching	By matching	By matching	By matching	By matching	By matching	By matching	By matching	By matching	By matching	By MS/MS
DPVLCFTQYEESSGK	gi|73535365	1758.78	880.389	2	145.69	15	0	Unmodified	0	287900	343070	0	0	0	0	0	0	0	860980	877000	368010	780010	723540	199570	574020	0	222350	0	521970	253620	0	0	491150	0	590800	455770	By matching	By matching	By matching	By matching	By matching	By matching	By matching	By matching	By matching	By matching	By MS/MS	By MS/MS	By matching
DSDTAIYYCAR	gi|121944590	1333.56	667.78	2	149.96	11	0	Unmodified	0	0	0	0	0	0	0	0	602340	0	678370	446080	617670	973610	0	0	206140	0	95101	0	0	0	0	0	0	0	0	0	By matching	By matching	By matching	By matching	By matching	By matching	By matching	By matching	By MS/MS	By matching	By MS/MS	By matching	By MS/MS
DSGVPDRFSGSGSGTDFTLK	gi|21669411	2028.94	1015.47	2	190.37	20	1	Unmodified	4715700	6212200	5247500	648930	9214500	6658700	8074700	7065800	2217100	4373300	12070000	8704400	16677000	9900500	5590800	2462600	2486100	2973500	5897300	6438300	2502600	3794600	3317200	1573500	3055300	11979000	2919300	8831100	By MS/MS	By MS/MS	By MS/MS	By matching	By MS/MS	By MS/MS	By MS/MS	By MS/MS	By MS/MS	By MS/MS	By MS/MS	By MS/MS	By MS/MS
DSGVPDRFSGSGSGTDFTLR	gi|630869283	2056.95	1029.47	2	113.73	20	1	Unmodified	208500	156170	3111800	0	231660	382570	698300	1545900	118060	217290	0	263750	1426400	436130	435920	307970	229170	410770	302780	156050	0	886910	512340	0	213810	0	196700	0	By matching	By matching	By MS/MS	By matching	By matching	By matching	By matching	By MS/MS	By matching	By matching	By matching	By matching	By MS/MS
DSLAVSLGER	gi|33570103	1045.54	523.77	2	114.89	10	0	Unmodified	0	0	0	0	0	0	0	0	119550	0	0	0	0	0	0	0	0	0	0	0	0	0	0	0	0	0	0	287800	By matching	By matching	By matching	By matching	By matching	By matching	By matching	By matching	By matching	By matching	By matching	By matching	By matching
DSLYLQLNSLR	gi|371446286	1320.7	661.352	2	142.97	11	0	Unmodified	0	0	0	0	0	0	0	0	0	0	0	0	0	0	0	0	0	0	0	0	0	0	0	0	0	0	0	571350	By matching	By matching	By matching	By matching	By matching	By matching	By matching	By matching	By matching	By matching	By matching	By matching	By matching
DSLYLQMNSLR	gi|519674088	1338.66	670.33	2	199.12	11	0	Unmodified	0	0	0	2832100	0	0	0	0	0	0	0	0	0	0	0	0	0	0	0	0	0	0	128240	0	0	0	0	0	By matching	By matching	By matching	By MS/MS	By matching	By matching	By matching	By matching	By matching	By matching	By matching	By matching	By matching
DSSGNHVLFGGGTK	gi|77378310	1374.65	688.326	2	65.528	14	0	Unmodified	0	535320	0	0	0	0	94829	0	0	117910	0	121280	59072	194250	0	104520	210340	0	171430	0	0	95137	0	0	0	0	61037	0	By matching	By MS/MS	By matching	By matching	By matching	By matching	By matching	By matching	By matching	By matching	By matching	By matching	By matching
DSSGNPVVFGGGTK	gi|70888110	1320.63	661.316	2	80.507	14	0	Unmodified	0	0	447090	0	0	0	0	0	0	0	0	0	0	0	0	0	0	0	0	0	0	0	0	0	0	0	0	0	By matching	By matching	By MS/MS	By matching	By matching	By matching	By matching	By matching	By matching	By matching	By matching	By matching	By matching
DSTYSLSSTLTLSK	gi|817599137	1501.75	751.876	2	286.09	14	0	Unmodified	186210000	179390000	182480000	251500000	231160000	212500000	157190000	158620000	362280000	192650000	269380000	233880000	209950000	315400000	229140000	199760000	234820000	198200000	174100000	254710000	203650000	157690000	116480000	209770000	128430000	217720000	147010000	171590000	By MS/MS	By MS/MS	By MS/MS	By MS/MS	By MS/MS	By MS/MS	By MS/MS	By MS/MS	By MS/MS	By MS/MS	By MS/MS	By MS/MS	By MS/MS
DSTYSLSSTLTLSKADYEK	gi|817599137	2108.02	1055.01	2	216.17	19	1	Unmodified	2949000	2551200	2684400	280040	973950	3432600	3096200	2218100	1412800	877520	4208800	2676800	1617700	1068200	1225200	1980100	2911100	1730400	1728200	1558000	2698200	2351700	2134300	1072300	1576400	2406500	1816700	1905300	By MS/MS	By MS/MS	By MS/MS	By matching	By MS/MS	By MS/MS	By MS/MS	By MS/MS	By MS/MS	By MS/MS	By MS/MS	By MS/MS	By MS/MS
DTAASTAYMELSSLR	gi|353254000	1614.76	808.378	2	91.812	15	0	Unmodified	0	0	0	1859600	0	0	0	0	0	0	0	0	0	0	0	0	0	0	0	0	0	0	0	0	0	0	0	0	By matching	By matching	By matching	By MS/MS	By matching	By matching	By matching	By matching	By matching	By matching	By matching	By matching	By matching
DTERPSGIPER	gi|70888104	1255.62	419.539	3	73.887	11	1	Unmodified	151960	44585	0	170610	0	528360	0	0	14466	0	421250	39436	0	0	0	657230	20883	0	0	0	440160	56417	0	0	0	278370	0	0	By matching	By matching	By matching	By matching	By matching	By MS/MS	By matching	By matching	By matching	By matching	By MS/MS	By matching	By matching
DTLMISR	gi|16554039	834.427	418.213	2	137.18	7	0	Unmodified	672480	314700	537930	1891900	756750	404230	110930	381410	1881800	237820	118180	119030	0	349920	102460	0	0	437390	142740	169030	0	103220	131200	138800	89117	0	105320	0	By MS/MS	By MS/MS	By MS/MS	By MS/MS	By MS/MS	By MS/MS	By matching	By MS/MS	By MS/MS	By MS/MS	By matching	By matching	By matching
DTLYLQLNSLR	gi|112701638	1334.72	668.36	2	102.97	11	0	Unmodified	0	0	0	0	0	0	0	0	0	0	0	0	0	0	0	0	0	0	0	0	0	481060	0	0	0	0	0	0	By matching	By matching	By matching	By matching	By matching	By matching	By matching	By matching	By matching	By matching	By matching	By matching	By matching
DTLYLQMDSLR	gi|197116005	1353.66	677.83	2	229	11	0	Unmodified	0	0	0	1806400	0	0	0	0	0	0	0	0	0	0	0	0	0	0	0	0	0	0	0	0	0	0	0	0	By matching	By matching	By matching	By MS/MS	By matching	By matching	By matching	By matching	By matching	By matching	By matching	By matching	By matching
DTQLTQSPSSLSASVGDR	gi|630868851	1847.89	924.943	2	189.77	18	0	Unmodified	211080	180600	0	0	0	630630	0	0	483030	0	0	0	0	127940	0	0	160340	250680	0	0	0	113660	0	0	0	0	97048	0	By matching	By matching	By matching	By matching	By matching	By MS/MS	By matching	By matching	By matching	By matching	By matching	By matching	By matching
DTQMTQSPSSLSASVGDR	gi|81251582	1865.84	933.921	2	237.66	18	0	Unmodified	0	0	0	5188800	0	0	0	0	0	0	0	0	0	0	0	0	0	0	0	0	0	0	0	0	0	0	0	0	By matching	By matching	By matching	By MS/MS	By matching	By matching	By matching	By matching	By matching	By matching	By matching	By matching	By matching
DTSASTAYMELNSLR	gi|29292443	1657.76	829.881	2	239.75	15	0	Unmodified	0	0	0	1261200	0	0	0	0	0	0	0	0	0	0	0	0	0	0	0	0	0	0	0	0	0	0	0	0	By matching	By matching	By matching	By MS/MS	By matching	By matching	By matching	By matching	By matching	By matching	By matching	By matching	By matching
DTSISTAYLELSR	gi|364515335	1454.73	728.363	2	184.11	13	0	Unmodified	0	1203200	0	0	0	0	256670	0	0	0	0	0	0	0	0	0	0	0	0	0	0	1826200	0	0	0	0	0	0	By matching	By MS/MS	By matching	By matching	By matching	By matching	By matching	By matching	By matching	By matching	By matching	By matching	By matching
DTSISTAYMELSR	gi|480312173	1472.68	737.341	2	171.73	13	0	Unmodified	295120	1475800	327100	874470	954670	165650	571040	0	0	0	691260	400650	881310	2280400	0	0	378060	0	0	0	335730	235020	0	0	0	0	0	0	By matching	By MS/MS	By matching	By matching	By matching	By matching	By MS/MS	By matching	By matching	By matching	By matching	By matching	By MS/MS
DTSISTAYMELSSLR	gi|630868300	1672.8	837.399	2	130.27	15	0	Unmodified	0	1232900	0	0	0	0	0	0	0	0	0	0	701660	0	0	0	0	0	0	0	0	0	0	0	0	0	0	0	By matching	By MS/MS	By matching	By matching	By matching	By matching	By matching	By matching	By matching	By matching	By matching	By matching	By matching
DTSLSTAYMDLSR	gi|815084978	1458.67	730.333	2	116.63	13	0	Unmodified	0	0	0	0	0	0	0	0	0	0	0	0	213510	668970	0	0	0	0	0	0	0	0	0	0	0	0	0	0	By matching	By matching	By matching	By matching	By matching	By matching	By matching	By matching	By matching	By matching	By matching	By matching	By matching
DTSSSTLYMELSSLR	gi|304562926	1688.79	845.396	2	120.9	15	0	Unmodified	0	0	0	1165900	0	0	0	0	482910	0	0	0	0	0	0	0	162950	0	0	0	0	0	0	0	0	0	275010	0	By matching	By matching	By matching	By MS/MS	By matching	By matching	By matching	By matching	By MS/MS	By matching	By matching	By matching	By matching
DTSTSTVFMELSSLR	gi|374074129	1672.8	837.399	2	109.83	15	0	Oxidation (M)	0	0	0	0	0	0	0	0	0	0	0	0	484800	252080	0	0	200070	0	0	186360	0	0	0	0	0	0	0	0	By matching	By matching	By matching	By matching	By matching	By matching	By matching	By matching	By matching	By matching	By matching	By matching	By MS/MS
DTSTSTVYMDLSSLR	gi|114147303	1674.78	838.389	2	149.35	15	0	Unmodified	0	0	0	2530600	0	220010	0	0	0	0	0	0	0	0	0	0	0	0	0	0	0	0	0	0	0	0	0	0	By matching	By matching	By matching	By MS/MS	By matching	By matching	By matching	By matching	By matching	By matching	By matching	By matching	By matching
DTSTSTVYMELSSLR	gi|46253978	1688.79	845.396	2	114.31	15	0	Unmodified	288040	378680	331100	1165900	886200	424830	234190	240330	0	352440	460870	0	484800	0	0	0	0	0	0	0	0	0	0	0	0	0	0	0	By matching	By matching	By matching	By MS/MS	By MS/MS	By matching	By matching	By matching	By matching	By matching	By matching	By matching	By MS/MS
DTTYYADSVR	gi|587261	1189.53	595.763	2	141.1	10	0	Unmodified	0	0	0	593750	0	0	0	0	0	0	0	0	0	0	0	0	0	0	0	0	0	0	0	0	0	0	0	0	By matching	By matching	By matching	By MS/MS	By matching	By matching	By matching	By matching	By matching	By matching	By matching	By matching	By matching
DTVFLQMNSLR	gi|519672970	1322.67	662.333	2	85.522	11	0	Unmodified	0	0	0	0	0	0	0	0	206310	0	0	0	0	0	0	0	0	0	0	0	0	0	0	0	0	0	0	0	By matching	By matching	By matching	By matching	By matching	By matching	By matching	By matching	By MS/MS	By matching	By matching	By matching	By matching
DVGAYNYVSWYQQHPGK	gi|16075978	2010.92	1006.46	2	103.04	17	0	Unmodified	0	0	0	0	0	0	0	0	0	0	1207800	0	0	0	0	0	0	0	0	0	0	0	0	0	0	0	0	0	By matching	By matching	By matching	By matching	By matching	By matching	By matching	By matching	By matching	By matching	By MS/MS	By matching	By matching
DVHLLESGGGLVQPGGSLR	gi|371446625	1890	945.998	2	144.15	19	0	Unmodified	2372300	0	1792200	0	1587500	0	0	0	1439900	1259200	2166900	2106800	0	0	1334000	0	0	0	0	1132100	0	846530	1436400	2722600	0	1497700	908300	831460	By MS/MS	By matching	By MS/MS	By matching	By MS/MS	By matching	By matching	By matching	By MS/MS	By MS/MS	By MS/MS	By MS/MS	By matching
DVHLVESGGGLVQPGGSLR	gi|247424392	1875.98	938.99	2	98.882	19	0	Unmodified	0	0	0	0	0	0	0	0	0	0	0	1671000	0	0	0	0	0	0	0	0	0	0	0	0	0	1712800	0	0	By matching	By matching	By matching	By matching	By matching	By matching	By matching	By matching	By matching	By matching	By matching	By matching	By matching
DVKLVESGGGLVQPGGSLR	gi|371448175	1867.02	934.508	2	212.85	19	1	Unmodified	0	0	1926100	0	2038300	0	1880300	0	0	0	0	0	0	0	0	0	1707300	822360	0	0	0	0	0	0	0	0	0	0	By matching	By matching	By MS/MS	By matching	By MS/MS	By matching	By MS/MS	By matching	By matching	By matching	By matching	By matching	By matching
DVLLVESGGGLVQPGGSLR	gi|519673578	1852.01	927.003	2	111.09	19	0	Acetyl (Protein N-term)	0	0	0	4430800	0	0	0	0	0	0	0	0	0	8372100	2539100	4323500	0	0	0	0	0	0	0	3244900	0	0	0	0	By matching	By matching	By matching	By matching	By matching	By matching	By matching	By matching	By matching	By matching	By matching	By matching	By matching
DVQLAESGGGLVQPGGSLR	gi|371447405	1838.95	920.474	2	131.98	19	0	Unmodified	0	0	0	0	0	0	0	0	0	0	0	0	1623500	0	0	994120	0	864040	0	0	0	0	0	151820	0	0	518900	0	By matching	By matching	By matching	By matching	By matching	By matching	By matching	By matching	By matching	By matching	By matching	By matching	By MS/MS
DVQLLDSGGGLVQPGR	gi|371445795	1609.84	805.921	2	84.508	16	0	Unmodified	0	0	0	0	0	0	0	0	0	0	0	0	627750	0	0	0	0	0	0	0	0	0	208230	0	0	0	0	0	By matching	By matching	By matching	By matching	By matching	By matching	By matching	By matching	By matching	By matching	By matching	By matching	By MS/MS
DVQLLESGGDLVQPGGSLR	gi|612407183	1939	970.501	2	191.89	19	0	Unmodified	0	0	5348900	0	0	0	0	0	0	0	0	0	0	0	0	0	6611300	0	0	0	0	0	0	9030700	0	0	0	0	By matching	By matching	By MS/MS	By matching	By matching	By matching	By matching	By matching	By matching	By matching	By matching	By matching	By matching
DVQLLESGGGFVQPGGSLR	gi|519674202	1914.98	958.49	2	85.054	19	0	Unmodified	0	0	0	0	0	0	0	797000	2656000	0	0	0	0	0	0	0	0	0	0	0	1553600	0	0	0	0	0	0	0	By matching	By matching	By matching	By matching	By matching	By matching	By matching	By MS/MS	By MS/MS	By matching	By matching	By matching	By matching
DVQLLESGGGLVQPGGSLK	gi|519674554	1852.99	927.495	2	63.936	19	0	Unmodified	0	0	0	1127900	0	0	0	0	0	0	0	1539400	0	0	0	0	0	1816400	0	0	0	0	0	0	0	0	0	2292300	By matching	By matching	By matching	By MS/MS	By matching	By matching	By matching	By matching	By matching	By matching	By matching	By matching	By matching
DVQLLESGGGLVQPGGSLR	gi|371446118	1881	941.498	2	152.13	19	0	Unmodified	0	7715100	1934400	0	263100	273560	0	0	362620	0	0	394240	998730	0	0	0	0	2975600	0	0	1832200	2238500	170160	894140	66824000	0	161870	168090	By matching	By MS/MS	By MS/MS	By matching	By matching	By matching	By matching	By matching	By matching	By matching	By matching	By matching	By MS/MS
DVQLTQSPSSLSASVGDR	gi|662564924	1845.91	923.953	2	205	18	0	Unmodified	2340400	0	0	0	273050	0	0	0	0	0	0	0	0	0	0	418040	0	0	0	0	0	0	0	0	0	0	0	2607000	By MS/MS	By matching	By matching	By matching	By matching	By matching	By matching	By matching	By matching	By matching	By matching	By matching	By matching
DVQLVESGEGLVQPGGSLR	gi|519673658	1939	970.501	2	85.046	19	0	Unmodified	13618000	0	0	0	0	0	0	0	0	0	0	0	0	0	0	0	0	0	0	0	0	0	0	0	0	0	0	0	By MS/MS	By matching	By matching	By matching	By matching	By matching	By matching	By matching	By matching	By matching	By matching	By matching	By matching
DVQLVESGGALVQPGGSLR	gi|700652832	1881	941.498	2	164.74	19	0	Unmodified	0	0	0	0	0	0	0	0	0	0	0	0	0	0	0	0	0	0	0	4010400	0	0	2217400	0	0	11118000	0	0	By matching	By matching	By matching	By matching	By matching	By matching	By matching	By matching	By matching	By matching	By matching	By matching	By matching
DVQLVESGGDLVKPGGSLR	gi|371445560	1925.02	963.511	2	127.37	19	1	Unmodified	0	0	0	0	88247	950150	0	0	0	0	181620	0	0	0	0	0	0	0	2302400	0	0	0	0	316270	0	0	0	0	By matching	By matching	By matching	By matching	By matching	By MS/MS	By matching	By matching	By matching	By matching	By matching	By matching	By matching
DVQLVESGGDLVQPGGSLR	gi|371446947	1924.99	963.493	2	109.42	19	0	Unmodified	0	0	0	0	0	0	0	0	0	0	0	0	0	0	0	0	0	0	0	0	4840500	0	0	0	0	0	0	0	By matching	By matching	By matching	By matching	By matching	By matching	By matching	By matching	By matching	By matching	By matching	By matching	By matching
DVQLVESGGGLLQPGGSLR	gi|371446739	1881	941.498	2	186.01	19	0	Unmodified	0	0	0	0	0	0	0	0	0	0	0	0	0	0	0	0	0	0	0	0	0	0	0	0	0	8507400	0	0	By matching	By matching	By matching	By matching	By matching	By matching	By matching	By matching	By matching	By matching	By matching	By matching	By matching
DVQLVESGGGLVKPGGSLR	gi|519673616	1867.02	934.508	2	204.51	19	1	Unmodified	1996700	1154800	1926100	0	2038300	4011800	1880300	1508600	2054700	0	2495700	2967300	901720	3355200	2238400	1849200	1707300	822360	604510	2769100	1497000	540400	3135700	1446200	0	0	945830	825350	By MS/MS	By MS/MS	By MS/MS	By matching	By MS/MS	By MS/MS	By MS/MS	By MS/MS	By MS/MS	By matching	By MS/MS	By MS/MS	By MS/MS
DVQLVESGGGLVQPGGSLR	gi|371447105	1866.98	934.49	2	191.71	19	0	Unmodified	0	0	4183100	2716500	243030	8320200	4568900	7017700	10422000	3424600	0	5110400	12137000	3830900	3767800	0	0	2101000	223330	6327500	2097800	6128700	2595000	3630300	2099700	159340	199980	10427000	By matching	By matching	By MS/MS	By MS/MS	By matching	By MS/MS	By MS/MS	By MS/MS	By MS/MS	By MS/MS	By matching	By MS/MS	By MS/MS
DVQLVESGGGLVR	gi|371447005	1327.71	664.855	2	131.86	13	0	Unmodified	0	0	0	618410	129850	0	0	0	0	0	0	0	0	0	0	0	0	0	0	0	0	0	0	0	0	0	0	0	By matching	By matching	By matching	By MS/MS	By matching	By matching	By matching	By matching	By matching	By matching	By matching	By matching	By matching
DVQLVESGGKLVQPGGSLR	gi|519673178	1938.05	647.018	3	80.488	19	1	Unmodified	221750	0	249910	0	246180	239290	235540	235920	304480	162640	0	337550	392750	291490	297560	379960	318050	1564100	445640	263450	357580	150870	107440	243680	0	600830	228690	0	By matching	By matching	By matching	By matching	By matching	By matching	By matching	By matching	By matching	By matching	By matching	By matching	By matching
DVQLVESGGSLVQPGGSLR	gi|247424663	1896.99	949.495	2	140.95	19	0	Unmodified	0	0	0	0	0	0	0	0	0	0	0	0	0	0	0	0	0	0	0	0	0	0	0	0	0	0	4824600	0	By matching	By matching	By matching	By matching	By matching	By matching	By matching	By matching	By matching	By matching	By matching	By matching	By matching
DVQLVQSGAEVK	gi|821350640	1271.67	636.836	2	185.2	12	0	Unmodified	1370500	574250	1450800	538700	1729600	1112600	1172700	688990	2712100	3394700	1491500	1403400	0	1180100	0	800950	1138600	535940	652470	852840	465860	798370	845210	593700	542450	623840	568760	1276300	By MS/MS	By MS/MS	By MS/MS	By MS/MS	By MS/MS	By MS/MS	By MS/MS	By MS/MS	By MS/MS	By MS/MS	By MS/MS	By matching	By matching
DVQMTQSPSSLSASVGDR	gi|5524147	1863.86	932.932	2	173.98	18	0	Unmodified	388790	201690	0	680960	516040	364080	136680	0	1122500	154580	158400	0	0	491210	316050	0	0	0	0	151320	0	0	243370	0	0	0	0	0	By MS/MS	By matching	By matching	By MS/MS	By MS/MS	By matching	By matching	By matching	By MS/MS	By matching	By matching	By matching	By matching
DVQVLESGGGLVQPGGSLR	gi|519674739	1866.98	934.49	2	151.58	19	0	Unmodified	0	4396800	4183100	0	2568000	3619000	0	0	0	0	4452700	0	0	0	0	0	0	0	2915800	0	0	903360	1618600	0	2099700	0	2519900	0	By matching	By MS/MS	By MS/MS	By matching	By MS/MS	By MS/MS	By matching	By matching	By matching	By matching	By MS/MS	By matching	By matching
DVQVVESGGGLVKPGGSLR	gi|519674280	1853	927.5	2	126.8	19	1	Unmodified	0	0	0	0	0	0	0	0	0	0	82031000	0	0	0	0	0	484050	1126800	0	0	0	0	0	0	0	564490	0	0	By matching	By matching	By matching	By matching	By matching	By matching	By matching	By matching	By matching	By matching	By MS/MS	By matching	By matching
DVQVVESGGGVVQPGR	gi|247425813	1581.81	791.906	2	108.25	16	0	Unmodified	0	0	0	0	0	0	0	0	0	0	0	0	0	0	0	0	0	0	0	0	0	0	0	0	0	0	1982800	0	By matching	By matching	By matching	By matching	By matching	By matching	By matching	By matching	By matching	By matching	By matching	By matching	By matching
DVSWYQQVPATAPK	gi|612405778	1588.79	795.394	2	118.16	14	0	Unmodified	0	0	0	0	0	0	0	0	0	0	474930	0	1288300	0	0	0	0	0	252930	0	0	0	0	0	0	0	0	0	By matching	By matching	By matching	By matching	By matching	By matching	By matching	By matching	By matching	By matching	By matching	By matching	By MS/MS
DVVLTQSPLSLPVTLGQPASLSCR	gi|95007531	2537.35	1269.68	2	125.39	24	0	Unmodified	0	0	0	0	0	0	0	0	0	0	0	1942300	0	0	0	0	924040	0	0	0	0	546090	0	1353200	144780	444890	0	0	By matching	By matching	By matching	By matching	By matching	By matching	By matching	By matching	By matching	By matching	By matching	By MS/MS	By matching
DVVMTQSPLSLPVTLGQPASISCR	gi|906849197	2555.31	1278.65	2	147.08	24	0	Unmodified	880180	1913800	547410	2449000	1474300	1268300	871930	670090	1321800	0	924630	518990	1376100	1403200	0	0	429720	0	419800	0	718490	694580	393790	0	0	442670	0	734380	By matching	By MS/MS	By matching	By MS/MS	By MS/MS	By MS/MS	By matching	By matching	By MS/MS	By matching	By MS/MS	By matching	By MS/MS
DVVMTQSPLSLPVTPGEPASISCR	gi|63103099	2540.26	1271.13	2	108.57	24	0	Unmodified	0	0	0	1253700	0	0	0	0	0	0	0	0	0	0	0	0	0	0	0	0	0	0	0	0	0	0	0	0	By matching	By matching	By matching	By MS/MS	By matching	By matching	By matching	By matching	By matching	By matching	By matching	By matching	By matching
DVWGQGTTVTVSSASTK	gi|342731405	1722.84	862.421	2	225.17	17	0	Unmodified	0	195720	604530	708320	367220	329690	660390	0	666580	319480	531470	338340	554550	295050	512020	196460	304500	283330	423200	477160	209230	402730	325970	392570	333890	449700	229470	325810	By matching	By matching	By MS/MS	By MS/MS	By matching	By MS/MS	By MS/MS	By matching	By MS/MS	By matching	By MS/MS	By matching	By MS/MS
DWFDPWGQGTLVTVSSASTK	gi|209402818	2181.04	1091.52	2	88.176	20	0	Unmodified	0	0	0	0	0	0	0	0	660730	0	0	188070	402650	214880	390530	0	0	0	0	0	0	0	0	0	0	0	322690	0	By matching	By matching	By matching	By matching	By matching	By matching	By matching	By matching	By matching	By matching	By matching	By matching	By matching
DYALHWVR	gi|519672664	1058.53	530.265	2	89.296	8	0	Unmodified	0	0	0	0	0	0	0	0	0	0	0	0	0	0	0	0	0	0	0	0	471170	0	0	0	0	0	0	0	By matching	By matching	By matching	By matching	By matching	By matching	By matching	By matching	By matching	By matching	By matching	By matching	By matching
DYALSWVR	gi|388776269	1008.5	505.251	2	97.635	8	0	Unmodified	0	0	0	0	0	0	0	0	0	0	0	0	0	0	0	0	0	0	0	0	0	0	0	0	0	0	0	423240	By matching	By matching	By matching	By matching	By matching	By matching	By matching	By matching	By matching	By matching	By matching	By matching	By matching
DYFPEPVTV	gi|695942354	1065.5	533.751	2	134.48	9	0	Unmodified	0	0	0	1470300	0	0	0	1328000	0	14349000	1690200	0	336720	716340	0	0	622440	0	878900	813130	634640	0	0	0	353230	590610	473090	303460	By matching	By matching	By matching	By MS/MS	By matching	By matching	By matching	By MS/MS	By matching	By MS/MS	By matching	By matching	By matching
DYFPEPVTVS	gi|323433102	1152.53	1153.53	1	109.01	10	0	Unmodified	0	0	0	6481600	0	0	765820	602900	1215300	820320	930690	0	0	852580	648500	0	1155300	0	0	0	0	577570	441310	1153100	0	827100	0	0	By matching	By matching	By matching	By matching	By matching	By matching	By MS/MS	By MS/MS	By matching	By matching	By matching	By matching	By matching
DYFPEPVTVSWNSGALT	gi|327410289	1881.88	941.939	2	114.06	17	0	Unmodified	310410	0	0	850820	0	0	684140	0	1012400	0	745180	0	308300	849190	840910	682530	724100	559150	0	901440	702080	426000	0	777350	261660	1069600	0	874770	By matching	By matching	By matching	By MS/MS	By matching	By matching	By MS/MS	By matching	By MS/MS	By matching	By MS/MS	By matching	By matching
DYFPEPVTVSWNSGALTSGVHTFPAVL	gi|46253938	2890.42	1446.21	2	103.71	27	0	Unmodified	0	3175200	0	8698100	3350000	2065000	5031100	3507800	3383900	3101200	0	0	0	0	2022400	0	3751100	0	0	3242300	0	0	0	0	0	0	0	0	By matching	By MS/MS	By matching	By MS/MS	By MS/MS	By MS/MS	By matching	By matching	By MS/MS	By matching	By matching	By matching	By matching
DYFPEPVTVSWNSGALTSGVHTFPAVLQSSGLYSL	gi|158714463	3725.83	1242.94	3	59.05	35	0	Unmodified	0	2415300	2210300	7081100	3126500	4624800	3637800	1975500	5288100	3636400	2902300	0	929740	4908100	3233000	2732300	3676400	1383800	0	3999700	1665500	1814400	0	1683100	1136600	2958200	0	3053600	By matching	By matching	By matching	By MS/MS	By MS/MS	By MS/MS	By MS/MS	By matching	By MS/MS	By MS/MS	By matching	By matching	By matching
DYLAWFQQK	gi|70798955	1197.58	599.791	2	163.15	9	0	Unmodified	0	0	0	0	0	0	0	0	0	0	0	0	0	0	0	0	500930	0	0	0	0	0	0	0	0	0	0	0	By matching	By matching	By matching	By matching	By matching	By matching	By matching	By matching	By matching	By matching	By matching	By matching	By matching
DYLAWFQQKPGQPPK	gi|70798955	1801.92	901.958	2	98	15	1	Unmodified	1675900	1842700	1383700	2094800	1624100	1230500	1397900	1136200	2303300	1656500	1531200	0	0	0	1368800	990090	1919000	0	1247400	688260	598420	539920	0	398490	308040	441800	0	373710	By matching	By matching	By matching	By matching	By matching	By matching	By matching	By matching	By matching	By matching	By matching	By matching	By matching
DYLAWYQQK	gi|353254632	1213.58	607.788	2	109.48	9	0	Unmodified	247850	247160	0	0	335310	173880	127100	201000	0	197390	470730	246310	0	325620	0	315400	337200	206200	0	62215	0	95619	114820	184210	258170	193510	167730	55286	By matching	By MS/MS	By matching	By matching	By MS/MS	By matching	By matching	By matching	By matching	By matching	By MS/MS	By matching	By matching
DYLAWYQQKPGQPPK	gi|323432197	1817.91	909.955	2	93.228	15	1	Unmodified	346860	421250	233220	562220	466840	376640	244560	311730	738660	435040	632230	386320	348820	1272500	0	0	470640	182650	134990	0	191260	228150	144660	200660	354410	340710	468530	0	By matching	By matching	By matching	By matching	By matching	By matching	By matching	By matching	By matching	By matching	By matching	By matching	By matching
DYVAWYQQKPGQAPR	gi|4378212	1805.88	602.962	3	63.181	15	1	Unmodified	0	0	0	0	0	0	0	0	0	0	0	0	0	0	0	234250	0	0	0	0	0	0	0	0	0	0	0	0	By matching	By matching	By matching	By matching	By matching	By matching	By matching	By matching	By matching	By matching	By matching	By matching	By matching
DYVSQFEGSALGK	gi|90108666	1399.66	700.831	2	193.06	13	0	Unmodified	518680	1141700	451870	421410	719810	351800	465750	1090100	601580	1319800	538690	1002600	478260	927350	933580	1440800	1087300	986830	1389000	783580	1080300	650030	547350	866430	750470	1124100	583860	628590	By MS/MS	By MS/MS	By MS/MS	By matching	By MS/MS	By MS/MS	By MS/MS	By MS/MS	By matching	By MS/MS	By MS/MS	By MS/MS	By MS/MS
DYWGQGTLVTVSSASTK	gi|2738305	1798.87	900.437	2	210.2	17	0	Unmodified	903430	1307800	2382100	1252000	1815000	498200	0	1952600	1623200	1599000	0	1176900	3250200	2625900	1931900	483460	3096400	0	889080	0	0	0	0	753120	0	483820	0	1812700	By matching	By matching	By MS/MS	By matching	By MS/MS	By matching	By matching	By MS/MS	By matching	By MS/MS	By matching	By matching	By MS/MS
DYWIGWVR	gi|323430832	1093.53	547.767	2	130.27	8	0	Unmodified	0	0	0	0	0	0	0	0	0	0	0	0	0	572050	0	0	0	0	0	0	0	0	0	0	0	0	0	0	By matching	By matching	By matching	By matching	By matching	By matching	By matching	By matching	By matching	By matching	By matching	By matching	By matching
DYYYGLDVWGQGTTVTVSSASTK	gi|618855141	2497.16	1249.58	2	149.32	23	0	Unmodified	0	0	0	0	0	952750	0	0	0	0	0	0	0	0	0	0	0	0	0	0	0	0	0	0	0	0	0	0	By matching	By matching	By matching	By matching	By matching	By MS/MS	By matching	By matching	By matching	By matching	By matching	By matching	By matching
EAKVQWKVDNALQSGNSQESVTEQDSK	gi|817599137	3004.44	1002.48	3	73.649	27	2	Unmodified	342580	0	0	0	0	0	182760	108900	0	0	0	0	0	0	0	457730	324180	0	0	0	311490	0	0	879740	390980	332810	0	0	By matching	By matching	By matching	By matching	By matching	By matching	By matching	By matching	By matching	By matching	By matching	By matching	By matching
EAQLEESGGGLVQPGGSLR	gi|519674060	1882.94	942.469	2	102.84	19	0	Acetyl (Protein N-term)	772320	0	0	0	0	0	0	0	0	0	0	0	0	0	0	0	0	0	0	0	0	0	608620	0	0	0	0	0	By MS/MS	By matching	By matching	By matching	By matching	By matching	By matching	By matching	By matching	By matching	By matching	By matching	By matching
EAQLLESGGDLVQPGGSLR	gi|32452729	1924.99	963.493	2	80.733	19	0	Unmodified	0	0	0	0	0	0	0	0	0	0	0	0	0	0	0	0	0	0	0	0	0	0	1858000	0	766940	0	0	0	By matching	By matching	By matching	By matching	By matching	By matching	By matching	By matching	By matching	By matching	By matching	By matching	By matching
EAQLLESGGGLVHPGGSLR	gi|197115856	1875.98	938.99	2	76.678	19	0	Unmodified	0	0	0	1048600	0	0	0	0	0	0	0	0	0	0	0	0	0	0	0	0	0	0	0	0	0	0	0	0	By matching	By matching	By matching	By MS/MS	By matching	By matching	By matching	By matching	By matching	By matching	By matching	By matching	By matching
EAQLLESGGGLVQPGGSLR	gi|47846721	1866.98	934.49	2	122.94	19	0	Unmodified	0	0	0	2716500	0	0	2130200	0	0	4375300	0	6927400	0	0	0	8096000	0	0	0	0	0	0	1618600	0	0	0	0	0	By matching	By matching	By matching	By MS/MS	By matching	By matching	By matching	By matching	By matching	By matching	By matching	By MS/MS	By matching
EAQLVDSGGDFIQPGGSLR	gi|519674072	1944.95	973.477	2	127.32	19	0	Unmodified	0	0	0	0	0	0	2215500	0	0	0	133050	0	0	0	0	0	0	0	0	0	0	215140	0	0	0	0	218250	0	By matching	By matching	By matching	By matching	By matching	By matching	By MS/MS	By matching	By matching	By matching	By matching	By matching	By matching
EAQLVESGGGLAQPGGSLR	gi|247424404	1824.93	913.466	2	154.6	19	0	Unmodified	2599800	100370	0	3402400	0	0	0	0	0	0	0	0	0	0	0	0	0	0	0	0	0	0	0	0	0	0	0	0	By MS/MS	By matching	By matching	By MS/MS	By matching	By matching	By matching	By matching	By matching	By matching	By matching	By matching	By matching
EAQLVESGGGLIQPGGSLR	gi|519673984	1866.98	934.49	2	191.71	19	0	Unmodified	0	0	0	0	3976400	0	0	0	0	0	0	0	0	0	0	0	0	0	0	0	0	0	0	0	0	4547200	0	0	By matching	By matching	By matching	By matching	By MS/MS	By matching	By matching	By matching	By matching	By matching	By matching	By matching	By matching
EAQLVESGGGLVKPGGSLR	gi|674841894	1853	927.5	2	140.8	19	1	Unmodified	0	0	1024300	0	0	1293600	0	797000	0	0	0	750770	1235600	1370400	0	0	0	1126800	0	0	0	0	684560	1086700	0	0	0	1862900	By matching	By matching	By MS/MS	By matching	By matching	By MS/MS	By matching	By MS/MS	By matching	By matching	By matching	By matching	By MS/MS
EAQLVESGGGLVQPGGSLR	gi|33318946	1852.96	927.482	2	171.13	19	0	Unmodified	0	0	2548800	3679700	415370	2950300	784760	0	0	0	3034500	3056400	0	13342000	2228500	7389700	4279200	2887600	4457900	0	6354200	0	149290	1851800	224990	3975000	2400800	2536700	By matching	By matching	By MS/MS	By MS/MS	By matching	By MS/MS	By matching	By matching	By matching	By matching	By MS/MS	By MS/MS	By matching
EAQLVESGGGLVQPGR	gi|519672754	1595.83	798.913	2	138.91	16	0	Unmodified	0	0	0	591790	798260	630610	1627700	0	669350	247740	9915500	0	0	1637500	0	755290	0	0	467920	0	0	0	0	0	0	0	0	0	By matching	By matching	By matching	By MS/MS	By MS/MS	By MS/MS	By MS/MS	By matching	By MS/MS	By matching	By MS/MS	By matching	By matching
EAQLVESGGGVVQPGR	gi|700653044	1581.81	791.906	2	125.61	16	0	Unmodified	0	0	0	0	0	0	0	0	0	0	0	0	0	0	0	291750	0	0	0	0	0	0	0	0	0	0	1982800	0	By matching	By matching	By matching	By matching	By matching	By matching	By matching	By matching	By matching	By matching	By matching	By matching	By matching
EAQVVESGGGLVQPGGSLR	gi|519672590	1838.95	920.474	2	141.64	19	0	Unmodified	820590	1031000	0	0	0	0	0	1042800	0	0	0	0	0	0	0	994120	0	0	0	0	1303100	0	70791	0	1189000	1468400	0	0	By MS/MS	By MS/MS	By matching	By matching	By matching	By matching	By matching	By MS/MS	By matching	By matching	By matching	By matching	By matching
EARLLESGGGLIQPGGSLR	gi|371446805	1909.04	955.519	2	111.11	19	1	Unmodified	0	2312200	1727800	1388500	0	0	1214200	0	0	863440	0	0	0	0	0	0	0	1131400	2068900	0	0	0	0	0	0	2563600	0	0	By matching	By matching	By matching	By MS/MS	By matching	By matching	By matching	By matching	By matching	By matching	By matching	By matching	By matching
EARLVESGGGLVRPGGSLR	gi|519672178	1909.05	955.525	2	68.41	19	2	Unmodified	0	0	0	2227400	0	0	0	0	0	0	0	0	0	0	0	0	0	0	0	0	0	0	0	0	0	0	0	0	By matching	By matching	By matching	By MS/MS	By matching	By matching	By matching	By matching	By matching	By matching	By matching	By matching	By matching
EDDTAVYYCAR	gi|519673868	1361.56	681.778	2	176.95	11	0	Unmodified	195140	986100	409270	125720	913990	443800	159350	1314500	765620	864310	343210	172800	335280	0	450330	728220	150180	551590	320780	0	613870	311040	0	1255400	289200	821120	103360	187780	By MS/MS	By MS/MS	By MS/MS	By matching	By MS/MS	By MS/MS	By MS/MS	By MS/MS	By MS/MS	By MS/MS	By MS/MS	By MS/MS	By matching
EDGGEIYYVDSVK	gi|1871481	1472.67	737.334	2	69.815	13	0	Unmodified	9087200	3920400	4803500	0	6746600	6711300	5193900	3278400	13542000	6151900	9377800	15761000	5848500	5980100	1458400	3409400	5713100	2789500	0	0	3062800	2771000	2372500	3164900	0	3321700	3530200	4044000	By MS/MS	By matching	By matching	By matching	By matching	By matching	By matching	By matching	By matching	By matching	By matching	By matching	By matching
EDLIWELLNQAQEHFGK	gi|49258810	2069.02	1035.51	2	123.76	17	0	Unmodified	0	0	0	0	0	0	159110	0	102710	561970	0	0	0	0	264880	0	0	0	0	0	0	0	0	0	0	0	0	0	By matching	By matching	By matching	By matching	By matching	By matching	By matching	By matching	By matching	By MS/MS	By matching	By matching	By matching
EDQLVESGGGLVQPGGSLR	gi|9968374	1896.95	949.477	2	118.84	19	0	Unmodified	0	0	0	0	0	0	0	0	0	1058600	0	0	0	1480400	0	0	0	0	0	0	882270	0	0	0	0	0	1312200	0	By matching	By matching	By matching	By matching	By matching	By matching	By matching	By matching	By matching	By matching	By matching	By matching	By matching
EELLEESGGGLVQPGGSLR	gi|371448113	1925.97	963.985	2	86.573	19	0	Unmodified	0	0	0	0	0	0	0	0	0	0	0	0	0	0	0	0	0	0	0	0	0	0	0	0	0	4779200	0	1432400	By matching	By matching	By matching	By matching	By matching	By matching	By matching	By matching	By matching	By matching	By matching	By matching	By matching
EEPLVESGGGLVQPGGSLR	gi|519672036	1879.96	940.982	2	66.264	19	0	Unmodified	0	0	0	0	0	0	0	0	0	0	0	0	0	0	0	0	0	0	0	0	0	0	0	0	0	0	0	0	By MS/MS	By matching	By matching	By matching	By matching	By matching	By matching	By matching	By matching	By matching	By matching	By matching	By matching
EEQLAESGGGLIQPGGSLR	gi|519671969	1896.95	949.477	2	82.01	19	0	Unmodified	0	0	0	0	0	0	0	0	0	0	0	0	0	1480400	0	0	0	0	0	0	0	0	0	0	0	0	0	0	By matching	By matching	By matching	By matching	By matching	By matching	By matching	By matching	By matching	By matching	By matching	By matching	By matching
EEQLLESGGGLVKPGGSLR	gi|371448071	1925.02	963.511	2	89.557	19	1	Unmodified	0	0	0	0	0	0	0	0	0	0	0	0	0	0	0	0	0	0	0	0	0	860630	0	0	0	0	0	0	By matching	By matching	By matching	By matching	By matching	By matching	By matching	By matching	By matching	By matching	By matching	By matching	By matching
EEQLLESGGGLVQPGGSLR	gi|59709538	1924.99	963.493	2	214.94	19	0	Unmodified	0	3877100	2228400	3375700	7850700	2536900	2013800	1612700	3329600	539590	3041000	3440900	6703700	4269000	4129900	0	5940200	4297100	1931400	1212200	5371900	8734700	1858000	1769600	1189000	0	3990900	3429700	By matching	By MS/MS	By MS/MS	By MS/MS	By MS/MS	By MS/MS	By MS/MS	By MS/MS	By MS/MS	By matching	By MS/MS	By MS/MS	By MS/MS
EEQLLQSGGGLVQPGGSLR	gi|519673146	1924	963.001	2	118.23	19	0	Unmodified	0	0	0	0	627370	0	0	0	0	0	0	0	0	0	0	919070	0	0	0	0	0	0	0	0	0	0	0	1435300	By matching	By matching	By matching	By matching	By matching	By matching	By matching	By matching	By matching	By matching	By matching	By matching	By matching
EEQLVESGGAVVQPGGSLR	gi|33319650	1910.97	956.485	2	216.31	19	0	Unmodified	0	0	0	0	7583200	4512700	5386200	0	0	0	0	0	10015000	0	0	0	0	0	2279300	0	0	4258700	0	0	4316900	0	4667800	0	By matching	By matching	By matching	By matching	By MS/MS	By MS/MS	By MS/MS	By matching	By matching	By matching	By matching	By matching	By MS/MS
EEQLVESGGGLAQPGGSLR	gi|247424255	1882.94	942.469	2	98.727	19	0	Unmodified	483920	0	198970	0	229750	0	0	513540	1193600	0	0	0	0	508900	0	333740	0	0	0	0	262390	242850	112760	494170	339650	0	139360	322870	By matching	By matching	By matching	By matching	By matching	By matching	By matching	By MS/MS	By matching	By matching	By matching	By matching	By matching
EEQLVESGGGLIQPGESLR	gi|247425524	1997.01	999.503	2	94.325	19	0	Unmodified	0	0	408550	0	0	0	0	0	686660	0	0	0	0	0	2968500	0	0	381990	0	0	0	0	0	0	0	0	0	0	By matching	By matching	By matching	By matching	By matching	By matching	By matching	By matching	By matching	By matching	By matching	By matching	By matching
EEQLVESGGGLVK	gi|247424166	1343.69	672.847	2	124.48	13	0	Unmodified	363330	0	0	156770	135320	0	362790	102620	230940	142880	105470	0	0	108670	147430	0	0	186740	143470	0	0	0	0	0	0	0	0	0	By MS/MS	By matching	By matching	By matching	By matching	By matching	By MS/MS	By matching	By matching	By matching	By matching	By matching	By matching
EEQLVESGGGLVKPGGSLR	gi|247424166	1911.01	956.503	2	176.85	19	1	Unmodified	474060	726050	820660	2216200	909640	2470400	779550	0	5486700	0	2462600	3815900	0	3408400	0	0	841310	1340200	1621000	731380	0	0	704320	0	0	3013000	1710400	0	By MS/MS	By MS/MS	By matching	By MS/MS	By MS/MS	By MS/MS	By MS/MS	By matching	By MS/MS	By matching	By MS/MS	By MS/MS	By matching
EEQLVESGGGLVQPGGSLR	gi|519672572	1910.97	956.485	2	209.23	19	0	Unmodified	0	3527700	0	0	0	0	5386200	0	0	0	2836200	0	3949400	0	0	5525600	0	6392600	0	3388000	1131500	0	222540	371530	4316900	7246700	5047400	4809900	By matching	By MS/MS	By matching	By matching	By matching	By matching	By MS/MS	By matching	By matching	By matching	By MS/MS	By matching	By MS/MS
EEQLVESGGGLVQPGR	gi|371447423	1653.83	827.916	2	198.95	16	0	Unmodified	0	0	0	0	1353900	708380	1360400	560310	1583200	1100500	1495200	1006900	1859600	1909200	686640	1145700	2143600	592870	0	0	1256900	879350	0	1249700	0	853830	1020900	0	By matching	By matching	By matching	By matching	By MS/MS	By MS/MS	By MS/MS	By MS/MS	By MS/MS	By MS/MS	By MS/MS	By MS/MS	By MS/MS
EEQLVQSGAEVK	gi|484718	1315.66	658.831	2	219.89	12	0	Unmodified	345420	195960	502040	845150	528970	716370	367500	306100	707590	1577700	799610	465300	364770	263300	162060	203950	232320	405660	306900	920210	178040	121550	419060	0	1155400	526140	249010	596240	By MS/MS	By MS/MS	By MS/MS	By MS/MS	By MS/MS	By MS/MS	By MS/MS	By MS/MS	By MS/MS	By MS/MS	By MS/MS	By MS/MS	By MS/MS
EEQVLESGGGLVKPGGSLR	gi|636666365	1911.01	956.503	2	154.31	19	1	Unmodified	0	0	0	0	0	0	0	0	0	0	0	0	0	2117300	0	0	0	0	0	0	0	0	0	0	0	0	0	0	By matching	By matching	By matching	By matching	By matching	By matching	By matching	By matching	By matching	By matching	By matching	By matching	By matching
EERLLESGGGLVQPGGSLR	gi|371445368	1953.03	977.514	2	149.73	19	1	Unmodified	0	0	0	4724300	0	0	0	0	0	0	0	0	0	0	0	0	0	0	0	0	0	0	0	0	0	0	0	0	By matching	By matching	By matching	By MS/MS	By matching	By matching	By matching	By matching	By matching	By matching	By matching	By matching	By matching
EERLVESGGGLVQPGGSLR	gi|247424367	1939.01	970.506	2	107.78	19	1	Unmodified	0	0	0	0	0	631830	0	0	0	9449200	0	0	0	0	0	0	0	0	0	0	0	0	3769700	0	13759000	0	0	0	By matching	By matching	By matching	By matching	By matching	By MS/MS	By matching	By matching	By matching	By MS/MS	By matching	By matching	By matching
EESPLLIGQQSTVSDVPR	gi|119590953	1954	978	2	120.11	18	0	Unmodified	0	0	0	0	0	0	0	0	0	0	589510	733900	404380	752960	673210	437310	0	0	0	0	200060	0	341130	0	0	0	503340	688240	By matching	By matching	By matching	By matching	By matching	By matching	By matching	By matching	By matching	By matching	By matching	By MS/MS	By matching
EFQVPTFTIPK	gi|28780	1305.7	653.848	2	96.334	11	0	Unmodified	307000	248280	0	0	0	104650	0	261770	0	171030	0	0	0	0	14626000	0	0	0	0	0	0	0	106480	111200	0	0	0	176990	By matching	By matching	By matching	By matching	By matching	By matching	By matching	By MS/MS	By matching	By matching	By matching	By matching	By matching
EGELVESGGTLVQPGGSLR	gi|519672148	1883.96	942.979	2	140.96	19	0	Acetyl (Protein N-term)	0	0	0	0	0	0	0	1113100	1302500	0	1727800	0	1627300	1768200	0	0	1960200	1349700	1553900	0	1405100	1174400	0	0	0	0	0	0	By matching	By matching	By matching	By matching	By matching	By matching	By matching	By MS/MS	By MS/MS	By matching	By matching	By matching	By MS/MS
EGNTYYADSVKGR	gi|112694628	1458.67	730.337	2	118.61	13	1	Unmodified	0	0	0	4706700	0	0	0	0	0	0	0	0	0	0	0	0	0	0	0	0	0	0	0	0	0	0	0	0	By matching	By matching	By matching	By MS/MS	By matching	By matching	By matching	By matching	By matching	By matching	By matching	By matching	By matching
EGQLLESGGDLVQPGGSLR	gi|371448348	1910.97	956.485	2	120.56	19	0	Unmodified	0	0	0	0	0	0	0	0	0	0	0	0	0	0	0	0	0	2175400	0	0	0	0	0	0	0	0	0	0	By matching	By matching	By matching	By matching	By matching	By matching	By matching	By matching	By matching	By matching	By matching	By matching	By matching
EGQLLESGGGLVQPGGSLR	gi|519674300	1852.96	927.482	2	158.15	19	0	Unmodified	0	0	362230	0	2496100	887540	0	4271700	0	0	811440	1052300	1091300	3100800	1076400	0	0	0	3187300	0	1059500	530290	1729000	1386700	0	663920	1395200	870350	By matching	By matching	By MS/MS	By matching	By MS/MS	By MS/MS	By matching	By MS/MS	By matching	By matching	By MS/MS	By MS/MS	By MS/MS
EGQLVDSGGGLVQPGGSLR	gi|371446737	1824.93	913.466	2	128.29	19	0	Unmodified	0	214740	0	0	0	145560	0	160520	0	0	0	0	0	0	0	0	0	0	0	0	0	1013500	463600	0	0	0	0	0	By matching	By matching	By matching	By matching	By matching	By matching	By matching	By matching	By matching	By matching	By matching	By matching	By matching
EGQLVESGGDLVQPGR	gi|683427852	1639.82	820.908	2	109.83	16	0	Unmodified	0	0	0	0	0	0	0	0	0	0	864260	0	0	1050700	175420	0	0	326070	0	0	99148	0	0	283060	0	0	69434	0	By matching	By matching	By matching	By matching	By matching	By matching	By matching	By matching	By matching	By matching	By MS/MS	By matching	By matching
EGQLVESGGGLIKPGGSLR	gi|5912474	1853	927.5	2	156.13	19	1	Acetyl (Protein N-term)	0	0	0	0	0	0	0	18374000	0	0	0	0	21989000	0	0	0	0	0	0	0	0	0	0	0	0	0	0	0	By matching	By matching	By matching	By matching	By matching	By matching	By matching	By MS/MS	By matching	By matching	By matching	By matching	By MS/MS
EGQLVESGGGLVQPGGSLR	gi|630868550	1838.95	920.474	2	161.08	19	0	Unmodified	2115100	3674200	1629100	1860400	2411800	1468400	1470500	1042800	1287000	374030	828110	674400	1623500	2229000	845780	2151600	1461500	919060	1376600	605520	1303100	1797200	972250	847430	920330	1468400	1235500	881050	By MS/MS	By MS/MS	By MS/MS	By MS/MS	By matching	By MS/MS	By MS/MS	By MS/MS	By MS/MS	By MS/MS	By MS/MS	By MS/MS	By MS/MS
EGQLVESGGGLVQPGR	gi|171853445	1581.81	791.906	2	188.9	16	0	Unmodified	232160	962570	122680	155330	412940	172000	430610	125920	344850	304700	918090	339470	1050300	903860	806060	0	301660	136430	0	0	293940	623190	125340	185460	146990	247550	1114600	0	By matching	By MS/MS	By matching	By matching	By matching	By matching	By matching	By matching	By matching	By matching	By MS/MS	By matching	By MS/MS
EIELTQSPGTLSLSPGER	gi|631234	1912.97	957.487	2	142.88	18	0	Unmodified	0	0	0	0	0	0	0	0	0	0	0	1958700	0	0	0	0	672540	0	0	0	0	0	0	310830	0	0	1765900	0	By matching	By matching	By matching	By matching	By matching	By matching	By matching	By matching	By matching	By matching	By matching	By MS/MS	By matching
EIELTQSPSSLSASVGDR	gi|404249086	1874.92	938.461	2	122.13	18	0	Acetyl (Protein N-term)	0	0	0	0	0	0	0	0	0	0	0	0	0	0	0	0	0	0	0	0	0	0	0	0	0	0	0	0	By matching	By matching	By matching	By matching	By matching	By matching	By matching	By matching	By matching	By matching	By matching	By matching	By matching
EIQLMESGGGLVQPGGSLR	gi|519672442	1926.98	964.492	2	162.92	19	0	Unmodified	0	0	0	0	0	0	0	0	1431900	0	0	0	0	0	0	0	0	0	0	0	0	0	0	0	0	0	0	0	By matching	By matching	By matching	By matching	By matching	By matching	By matching	By matching	By MS/MS	By matching	By matching	By matching	By matching
EIQLVESGGGLAQPGGSLR	gi|197116013	1866.98	934.49	2	150.63	19	0	Unmodified	0	0	3732600	4305700	0	4619800	2257100	0	0	3424600	0	0	7090200	0	0	0	0	0	0	0	0	3546700	0	0	3109000	0	0	0	By matching	By matching	By MS/MS	By MS/MS	By matching	By MS/MS	By MS/MS	By matching	By matching	By MS/MS	By matching	By matching	By MS/MS
EIQLVQSGAEVK	gi|2982025	1299.7	650.852	2	101.45	12	0	Unmodified	0	0	0	0	0	1509000	0	0	0	0	0	0	0	0	0	0	0	0	0	0	0	0	0	0	0	0	0	0	By matching	By matching	By matching	By matching	By matching	By MS/MS	By matching	By matching	By matching	By MS/MS	By matching	By matching	By matching
EIQMTQSPDSLAVSLGER	gi|440919790	1959.96	980.979	2	217.67	18	0	Unmodified	2581400	3059900	1631600	912890	3194700	2497100	3646200	3964300	5752200	3021500	4434600	3627600	5070700	5448900	3216200	3432300	3488600	2106400	3360200	3489900	3541300	3542800	2666200	3367100	2455200	4586600	4173000	3526400	By MS/MS	By MS/MS	By MS/MS	By matching	By MS/MS	By MS/MS	By MS/MS	By MS/MS	By MS/MS	By MS/MS	By MS/MS	By MS/MS	By MS/MS
EIVLAQSPGTLSLSPGER	gi|700652780	1852.99	927.495	2	157.73	18	0	Unmodified	981050	628120	529690	644290	1568400	1335100	0	0	1669700	1054400	0	1023100	0	572560	898630	0	2916800	0	864290	1354000	0	610040	0	0	442110	0	0	0	By matching	By matching	By matching	By matching	By MS/MS	By MS/MS	By matching	By matching	By MS/MS	By matching	By matching	By MS/MS	By matching
EIVLTQFPATLSLSPGER	gi|47154910	1957.05	979.526	2	90.385	18	0	Unmodified	490550	244130	305240	0	625630	0	389440	417060	310870	931690	0	286920	0	440260	220410	638410	0	0	0	275600	0	177800	139270	0	0	304790	0	0	By matching	By matching	By matching	By matching	By matching	By matching	By matching	By matching	By matching	By matching	By matching	By matching	By matching
EIVLTQSPAILSLSPGER	gi|109693121	1909.05	955.526	2	173.34	18	0	Unmodified	1575200	600150	0	286450	0	596560	538060	226860	0	0	0	620140	453860	0	0	1097600	379370	0	560780	415850	738460	786150	535900	2025700	0	0	0	262150	By MS/MS	By matching	By matching	By matching	By matching	By MS/MS	By matching	By matching	By matching	By matching	By matching	By matching	By matching
EIVLTQSPATLSFSPGER	gi|662564598	1931	966.5	2	229.62	18	0	Unmodified	0	0	0	0	0	0	0	0	0	487370	0	0	0	13708000	0	0	0	0	0	400280	0	515040	0	0	978900	722060	0	0	By matching	By matching	By matching	By matching	By matching	By matching	By matching	By matching	By matching	By matching	By matching	By matching	By matching
EIVLTQSPATLSLFPGER	gi|18025596	1957.05	979.526	2	108.71	18	0	Unmodified	0	2030000	0	0	0	0	0	0	0	0	0	0	0	0	0	0	0	0	0	0	0	0	0	0	0	0	0	0	By matching	By MS/MS	By matching	By matching	By matching	By matching	By matching	By matching	By matching	By matching	By matching	By matching	By matching
EIVLTQSPATLSLSPGDR	gi|109693188	1883	942.5	2	232.01	18	0	Unmodified	4926400	2367100	3601700	8289300	4163900	0	0	2940300	0	4550300	0	0	0	5785500	3127900	11340000	3056700	0	5875700	0	4942600	0	0	0	3134600	0	0	2986200	By MS/MS	By MS/MS	By MS/MS	By MS/MS	By MS/MS	By matching	By matching	By MS/MS	By matching	By MS/MS	By matching	By matching	By matching
EIVLTQSPATLSLSPGEK	gi|1864119	1869.01	935.505	2	152.66	18	0	Unmodified	367310	0	0	0	0	0	0	0	0	3448300	266570	631120	0	0	0	341600	0	510200	0	0	0	398360	0	0	243240	0	0	0	By matching	By matching	By matching	By matching	By matching	By matching	By matching	By matching	By matching	By MS/MS	By matching	By matching	By matching
EIVLTQSPATLSLSPGESATLSCR	gi|695942284	2516.28	1259.14	2	172.06	24	0	Unmodified	0	0	425220	3542200	549570	904280	0	298330	0	606460	299860	0	0	539090	1162700	0	325430	0	0	0	292470	363510	709730	1427500	0	901200	571690	452090	By matching	By matching	By matching	By MS/MS	By matching	By matching	By matching	By matching	By matching	By matching	By matching	By matching	By matching
EIVLTQSPATLSLSPGETATLSCR	gi|47154918	2530.29	1266.15	2	108.55	24	0	Unmodified	0	0	0	0	0	278630	0	0	0	307380	0	0	0	0	0	0	0	0	0	0	0	335830	0	573610	0	0	0	0	By matching	By matching	By matching	By matching	By matching	By matching	By matching	By matching	By matching	By matching	By matching	By matching	By matching
EIVLTQSPATLSVSPGER	gi|218783334	1883	942.5	2	116.61	18	0	Unmodified	0	0	0	0	4163900	8229700	0	0	0	0	4855800	0	8869500	0	0	0	0	0	0	4505900	0	0	0	0	3134600	0	0	0	By matching	By matching	By matching	By matching	By MS/MS	By MS/MS	By matching	By matching	By matching	By matching	By MS/MS	By matching	By MS/MS
EIVLTQSPATLSVSPGK	gi|561703	1725.95	863.976	2	132.84	17	0	Unmodified	255200	0	0	1346500	0	303980	0	0	0	0	0	424680	0	0	235730	0	454980	377190	0	0	373840	326520	0	0	217220	0	0	0	By matching	By matching	By matching	By MS/MS	By matching	By matching	By matching	By matching	By matching	By matching	By matching	By matching	By matching
EIVLTQSPATVSLSPGER	gi|51103395	1883	942.5	2	122.96	18	0	Unmodified	0	0	0	179430000	0	0	0	0	0	0	0	0	0	0	0	0	0	0	5875700	4505900	4942600	2794400	0	121570000	0	0	0	2986200	By matching	By matching	By matching	By MS/MS	By matching	By matching	By matching	By matching	By matching	By matching	By matching	By matching	By matching
EIVLTQSPDFQSVTPK	gi|924443593	1787.93	894.965	2	228.76	16	0	Unmodified	1096600	1317000	854270	596830	3870100	628540	1668100	1177900	1454000	804060	940040	1799100	2146800	1598900	761930	720880	3430000	791290	1337900	1042400	1310700	1464600	1141200	1021700	915050	1626600	622610	1255800	By MS/MS	By MS/MS	By MS/MS	By matching	By MS/MS	By MS/MS	By MS/MS	By MS/MS	By MS/MS	By MS/MS	By MS/MS	By MS/MS	By MS/MS
EIVLTQSPDTLSLSPGDR	gi|808351590	1926.99	964.495	2	148.06	18	0	Unmodified	2699200	0	0	0	0	1762400	0	0	0	0	0	0	0	0	0	0	0	0	0	0	0	0	0	0	0	0	0	0	By MS/MS	By matching	By matching	By matching	By matching	By MS/MS	By matching	By matching	By matching	By matching	By matching	By matching	By matching
EIVLTQSPDTLSLSPGER	gi|358439861	1941.01	971.503	2	258.13	18	0	Unmodified	11888000	5520900	7888100	9853500	0	6899900	0	7230900	10722000	9693400	0	0	11570000	0	0	254550	27176000	0	0	0	0	0	9067100	0	391700	315250	0	0	By MS/MS	By MS/MS	By MS/MS	By MS/MS	By matching	By MS/MS	By matching	By MS/MS	By MS/MS	By MS/MS	By matching	By matching	By MS/MS
EIVLTQSPDTLSVSPGER	gi|808351210	1926.99	964.495	2	118.96	18	0	Unmodified	310010	499140	176030	0	481270	0	0	0	0	0	0	429270	0	692690	0	404370	608670	290420	0	0	266400	0	0	0	616390	0	0	0	By matching	By MS/MS	By matching	By matching	By MS/MS	By matching	By matching	By matching	By matching	By matching	By matching	By MS/MS	By MS/MS
EIVLTQSPESLSLSPGDR	gi|109240724	1926.99	964.495	2	97.384	18	0	Unmodified	2699200	0	0	0	0	0	0	0	0	0	0	0	0	0	0	0	0	0	0	0	0	0	0	0	0	0	0	0	By MS/MS	By matching	By matching	By matching	By matching	By matching	By matching	By matching	By matching	By matching	By matching	By matching	By matching
EIVLTQSPGALSLSPGER	gi|58222746	1852.99	927.495	2	94.958	18	0	Unmodified	0	0	0	0	0	0	0	1123200	0	0	0	0	733780	0	0	0	0	1023000	0	0	0	0	827160	0	361640	0	0	0	By matching	By matching	By matching	By matching	By matching	By matching	By matching	By MS/MS	By matching	By matching	By matching	By matching	By matching
EIVLTQSPGILSLSPGER	gi|21669113	1895.04	948.518	2	242.09	18	0	Unmodified	3411400	644400	628910	773140	1866300	1835700	1033700	626020	2688400	1008700	1433000	845630	1005700	1683800	771970	2028400	1739000	1058400	1275400	1403400	1294800	1677500	2441200	1163400	803270	896900	1204900	957610	By MS/MS	By MS/MS	By MS/MS	By MS/MS	By MS/MS	By MS/MS	By MS/MS	By MS/MS	By MS/MS	By MS/MS	By MS/MS	By MS/MS	By MS/MS
EIVLTQSPGPLSLSPGER	gi|118490145	1879.01	940.503	2	107.15	18	0	Unmodified	0	0	1414900	659480	1390100	1084600	1062500	1302000	1732300	1397100	2669200	1330400	1269800	1766200	1563200	1280400	841800	839950	988670	1307000	1221400	1114200	0	2059700	454480	2100400	637010	1676000	By matching	By matching	By MS/MS	By matching	By MS/MS	By MS/MS	By matching	By MS/MS	By MS/MS	By MS/MS	By MS/MS	By MS/MS	By MS/MS
EIVLTQSPGSLSLSPGER	gi|18025580	1868.98	935.492	2	226.23	18	0	Unmodified	0	0	0	2182900	0	3907200	1881500	0	0	0	0	0	0	0	9056900	0	0	0	7889700	3308300	2742700	0	0	0	0	0	0	0	By matching	By matching	By matching	By matching	By matching	By MS/MS	By MS/MS	By matching	By matching	By matching	By matching	By matching	By matching
EIVLTQSPGTLSASPGER	gi|87914	1840.95	921.477	2	149.24	18	0	Unmodified	0	137900	0	0	0	1238600	0	0	0	0	0	0	0	195200	0	0	0	0	292140	0	0	0	0	0	0	535900	0	0	By matching	By matching	By matching	By matching	By matching	By MS/MS	By matching	By matching	By matching	By matching	By matching	By matching	By matching
EIVLTQSPGTLSFSPGER	gi|662564614	1916.98	959.492	2	243.37	18	0	Unmodified	630260	690620	765420	0	839310	1052900	0	0	479560	600160	1434700	916900	0	1585000	586380	664290	0	436360	1044300	1628400	350080	0	578840	2054200	248050	0	3026900	531570	By matching	By matching	By matching	By matching	By matching	By MS/MS	By matching	By matching	By matching	By matching	By matching	By matching	By matching
EIVLTQSPGTLSLFPGER	gi|5921609	1943.04	972.518	2	133.52	18	0	Unmodified	2117600	0	0	0	972800	0	0	0	1605100	0	616810	0	0	0	0	0	0	2998300	0	1195500	0	0	0	0	0	0	0	0	By matching	By matching	By matching	By matching	By matching	By matching	By matching	By matching	By MS/MS	By matching	By matching	By matching	By matching
EIVLTQSPGTLSLSPGAR	gi|316925517	1824.99	913.497	2	228.32	18	0	Unmodified	430930	535060	326380	701780	804790	591520	0	455510	1174500	673380	574430	1016700	777410	0	604690	395400	488960	444880	435400	2870400	0	690330	1314400	341900	667730	464410	0	0	By MS/MS	By matching	By matching	By matching	By MS/MS	By matching	By matching	By matching	By MS/MS	By matching	By matching	By MS/MS	By MS/MS
EIVLTQSPGTLSLSPGDR	gi|662564819	1868.98	935.492	2	279.5	18	0	Unmodified	10153000	0	10450000	24699000	16793000	15388000	0	0	23860000	19345000	0	0	15904000	8322000	0	0	0	11984000	17737000	0	13953000	13733000	9936000	16204000	14843000	10087000	0	0	By matching	By matching	By MS/MS	By MS/MS	By MS/MS	By MS/MS	By matching	By matching	By MS/MS	By MS/MS	By matching	By matching	By MS/MS
EIVLTQSPGTLSLSPGEGATLSCR	gi|630869151	2472.25	1237.13	2	206.92	24	0	Unmodified	1473000	2654900	673320	2264700	1216400	1358500	1001300	1318800	2760800	1503400	1238900	794060	1226800	1448000	1693300	777350	1067100	2257400	1841200	1074400	1320000	1425100	658280	2366600	717340	1513100	976240	1378800	By MS/MS	By MS/MS	By matching	By MS/MS	By matching	By MS/MS	By matching	By MS/MS	By MS/MS	By MS/MS	By MS/MS	By matching	By MS/MS
EIVLTQSPGTLSLSPGEK	gi|910276932	1854.99	928.497	2	194.67	18	0	Unmodified	1232100	0	0	0	2229800	0	358340	664040	1708600	1369400	0	0	0	0	0	0	0	0	0	0	2435100	435910	0	1162000	0	0	0	662100	By MS/MS	By matching	By matching	By matching	By MS/MS	By matching	By matching	By matching	By MS/MS	By MS/MS	By matching	By matching	By matching
EIVLTQSPGTLSLSPGESATLSCR	gi|662564954	2502.26	1252.13	2	202.41	24	0	Unmodified	721020	788770	834470	323750	1531300	1333300	0	805330	2607600	871030	620000	930350	385530	1087900	1109000	411050	573060	2475800	962760	0	1312700	701750	459510	2374200	476580	880590	335610	0	By MS/MS	By matching	By MS/MS	By matching	By MS/MS	By MS/MS	By matching	By MS/MS	By MS/MS	By MS/MS	By matching	By MS/MS	By matching
EIVLTQSPGTLSLSPGETATLSCR	gi|827343207	2516.28	1259.14	2	132.36	24	0	Unmodified	501830	0	518900	339210	622920	795530	511580	375570	1103000	762700	795390	0	0	1098400	815600	990960	393090	411090	615140	0	0	0	672300	719410	349200	679870	345440	483990	By matching	By matching	By matching	By matching	By matching	By matching	By matching	By matching	By MS/MS	By MS/MS	By matching	By matching	By matching
EIVLTQSPGTLSLSPGK	gi|58223192	1725.95	863.976	2	125.96	17	0	Unmodified	0	0	0	1346500	0	0	0	0	0	0	0	0	0	0	0	0	0	0	0	0	0	0	0	0	0	0	0	0	By matching	By matching	By matching	By MS/MS	By matching	By matching	By matching	By matching	By matching	By matching	By matching	By matching	By matching
EIVLTQSPGTLSLSPGQR	gi|695942622	1882.02	942.008	2	85.087	18	0	Unmodified	0	0	3120900	3147100	0	2493700	0	0	0	0	0	0	0	0	0	3087000	0	0	0	0	0	0	0	0	0	0	0	0	By matching	By matching	By MS/MS	By matching	By matching	By matching	By matching	By matching	By MS/MS	By matching	By matching	By MS/MS	By matching
EIVLTQSPGTLSLSSGER	gi|453071232	1872.98	937.49	2	85.054	18	0	Unmodified	0	0	0	0	0	0	0	0	0	0	373930	572810	0	379800	0	0	0	0	0	0	0	0	0	0	0	0	0	0	By matching	By matching	By matching	By matching	By matching	By matching	By matching	By matching	By matching	By matching	By matching	By MS/MS	By matching
EIVLTQSPGTLSLYPGER	gi|156632988	1959.03	980.516	2	190.8	18	0	Unmodified	0	0	291850	0	283190	0	0	0	0	0	0	0	0	0	0	0	0	0	0	3417800	0	912800	0	0	375960	0	0	0	By matching	By matching	By matching	By matching	By matching	By matching	By matching	By matching	By matching	By matching	By matching	By matching	By matching
EIVLTQSPGTLSSSPGER	gi|58223152	1856.95	929.474	2	202.81	18	0	Unmodified	816100	446050	269540	2142400	814920	405520	234290	0	880640	573740	657910	414890	0	731600	1289200	630490	706720	255400	0	933930	607480	424910	2693700	999360	195570	0	259640	0	By matching	By matching	By matching	By MS/MS	By matching	By matching	By matching	By matching	By matching	By MS/MS	By MS/MS	By matching	By matching
EIVLTQSPGTVSLSPGER	gi|662564844	1868.98	935.492	2	259.55	18	0	Unmodified	4030800	1566000	0	0	5022700	3907200	2647800	2089800	0	6199700	0	19503000	3028700	4705500	9056900	0	0	0	0	5546900	6232600	0	0	0	0	2575100	0	0	By MS/MS	By MS/MS	By matching	By matching	By MS/MS	By MS/MS	By MS/MS	By MS/MS	By matching	By MS/MS	By matching	By MS/MS	By MS/MS
EIVLTQSPLSLPVTPGEPASISCR	gi|219566379	2550.34	1276.17	2	118.24	24	0	Unmodified	0	0	2878400	0	0	681690	0	0	0	0	0	0	0	0	0	0	0	0	0	0	0	0	0	0	0	0	0	0	By matching	By matching	By MS/MS	By matching	By matching	By matching	By matching	By matching	By matching	By matching	By matching	By matching	By matching
EIVLTQSPLTLSVSPGER	gi|342518741	1925.05	963.524	2	81.643	18	0	Unmodified	0	0	0	1159100	0	0	0	0	0	0	0	0	2206200	0	0	0	0	0	0	0	0	0	0	0	0	0	0	0	By matching	By matching	By matching	By MS/MS	By matching	By matching	By matching	By matching	By matching	By matching	By matching	By matching	By MS/MS
EIVLTQSPSFLSASVGDR	gi|316925577	1904.98	635.995	3	45.614	18	0	Unmodified	480830	573530	510710	654590	662000	482590	520650	356630	898170	479140	717210	529840	663590	774790	376950	421240	0	553730	444600	0	0	522280	404070	477430	0	608380	303470	0	By matching	By matching	By matching	By matching	By matching	By matching	By matching	By matching	By MS/MS	By matching	By matching	By matching	By matching
EIVLTQSPSSLSLSPGER	gi|524845779	1898.99	950.497	2	83.894	18	0	Unmodified	0	0	0	0	0	0	0	0	0	0	0	0	0	0	0	0	0	367170	0	0	0	0	0	0	0	0	0	0	By matching	By matching	By matching	By matching	By matching	By matching	By matching	By matching	By matching	By matching	By matching	By matching	By matching
EIVLTQSPVTLSLSPGER	gi|18025670	1925.05	963.524	2	218.64	18	0	Unmodified	3319100	1271600	1739200	1159100	2840300	2175100	3400900	1579300	4535200	2671100	3728400	2451200	2206200	4279800	2128500	3084500	2457100	1512700	1083600	2333000	0	2049400	1473300	4529500	3631300	1714500	1053800	1936000	By MS/MS	By MS/MS	By MS/MS	By MS/MS	By MS/MS	By MS/MS	By MS/MS	By MS/MS	By MS/MS	By MS/MS	By MS/MS	By MS/MS	By MS/MS
EIVLTQYPATLSLSPGER	gi|662564719	1973.05	987.524	2	222.11	18	0	Unmodified	0	0	0	0	0	0	0	0	0	0	0	0	0	0	0	0	0	0	0	3935500	0	0	0	0	0	0	0	0	By matching	By matching	By matching	By matching	By matching	By matching	By matching	By matching	By matching	By matching	By matching	By matching	By matching
EIVMTQSPATLSVSPGGR	gi|87916	1828.94	915.468	2	124.98	18	0	Oxidation (M)	0	0	0	306710	823970	1338800	0	0	0	0	0	781730	0	0	340350	0	254780	0	0	0	0	0	0	0	0	0	0	0	By matching	By matching	By matching	By matching	By matching	By MS/MS	By matching	By matching	By matching	By matching	By matching	By matching	By matching
EIVMTQSPGTLSVSPGER	gi|238284	1886.94	944.47	2	148.52	18	0	Unmodified	489430	882050	0	0	742200	272200	0	0	545310	0	270860	0	450580	264850	0	0	0	0	0	0	0	0	0	0	0	0	0	0	By matching	By MS/MS	By matching	By matching	By matching	By matching	By matching	By matching	By matching	By matching	By matching	By matching	By matching
EIVVTQSPATLSVSPGER	gi|630868803	1868.98	935.492	2	115.2	18	0	Unmodified	0	0	0	0	0	0	0	0	0	0	0	1065700	0	0	10466000	0	0	0	0	0	0	0	0	0	0	0	0	0	By matching	By matching	By matching	By matching	By matching	By matching	By matching	By matching	By matching	By matching	By matching	By MS/MS	By matching
EKELVESGGGLVQPGGSLR	gi|371445586	1911.01	956.503	2	187.5	19	1	Unmodified	893100	2263300	0	7211000	2815400	1573600	1295400	1282800	5486700	894490	0	2323500	621380	3408400	0	2515500	0	2013200	987510	0	2320800	508880	1043900	490300	481500	2074000	2388800	1159800	By matching	By MS/MS	By matching	By MS/MS	By MS/MS	By MS/MS	By MS/MS	By MS/MS	By MS/MS	By MS/MS	By matching	By MS/MS	By matching
ELLESYIDGR	gi|999823	1193.59	597.796	2	173.24	10	0	Unmodified	403100	586180	530500	63446	267180	150590	201100	294690	0	151500	0	1006400	765760	724260	795380	802810	883790	796980	981540	0	973650	455970	383440	850920	686970	852350	1053300	844580	By matching	By MS/MS	By MS/MS	By matching	By matching	By matching	By matching	By matching	By matching	By matching	By matching	By MS/MS	By MS/MS
ELQLLESGGGLVQPGGSLR	gi|247425649	1909.03	955.513	2	118.84	19	0	Unmodified	0	0	0	0	0	0	0	0	0	0	0	0	0	0	0	0	0	0	0	0	0	0	0	0	0	2437100	0	0	By matching	By matching	By matching	By matching	By matching	By matching	By matching	By matching	By matching	By matching	By matching	By matching	By matching
ELQLVDSGGGLVQPGGSLR	gi|247426198	1881	941.498	2	170.14	19	0	Unmodified	0	0	0	0	0	0	0	0	0	0	0	0	0	0	0	0	0	0	0	0	0	0	0	86295000	0	0	0	0	By matching	By matching	By matching	By matching	By matching	By matching	By matching	By matching	By matching	By matching	By matching	By matching	By matching
ELQLVESGGALVQPGGSLR	gi|371446450	1909.03	955.513	2	101.53	19	0	Unmodified	0	472470	0	209870	520990	316590	0	0	0	0	585320	2833300	0	0	0	0	1746000	0	0	0	2598900	1615200	0	0	781780	354320	0	210650	By matching	By MS/MS	By matching	By matching	By matching	By matching	By matching	By matching	By matching	By matching	By matching	By MS/MS	By matching
ELQLVESGGAVVQPGESLR	gi|371445614	1967.03	984.516	2	114.55	19	0	Unmodified	0	2366800	0	0	0	0	0	0	0	0	751100	0	0	0	0	0	0	859040	0	0	0	0	0	0	0	1167700	0	0	By matching	By MS/MS	By matching	By matching	By matching	By matching	By matching	By matching	By matching	By matching	By matching	By matching	By matching
ELQLVESGGDLVQPGGSLR	gi|32452711	1953.02	977.508	2	129.11	19	0	Unmodified	0	0	0	0	0	0	0	2600200	7275900	2674500	0	0	0	0	0	0	226710	0	0	0	0	0	7015400	0	0	0	0	0	By matching	By matching	By matching	By matching	By matching	By matching	By matching	By MS/MS	By MS/MS	By MS/MS	By matching	By matching	By matching
ELQLVESGGGLVKPGGSLR	gi|197115930	1895.05	948.524	2	110.61	19	1	Unmodified	3262200	0	551360	407200	458190	168360	0	389110	423500	0	448660	656130	449490	535490	0	774560	319850	274470	0	352690	0	618950	0	0	137380	509320	275560	255070	By MS/MS	By matching	By matching	By MS/MS	By matching	By matching	By matching	By matching	By matching	By matching	By matching	By matching	By matching
ELQLVESGGGLVQPGGSLR	gi|354686690	1895.01	948.506	2	146.68	19	0	Unmodified	0	95729000	0	0	0	61321000	0	0	0	0	0	0	0	0	0	0	0	0	0	0	452730	0	0	0	0	0	0	0	By MS/MS	By MS/MS	By matching	By matching	By matching	By MS/MS	By matching	By matching	By matching	By matching	By matching	By matching	By matching
ELQLVESGGGLVQPGR	gi|392572	1637.87	819.937	2	127.29	16	0	Unmodified	0	294030	0	0	0	0	670270	0	0	0	0	606050	195040	0	0	486790	0	0	0	0	0	1323400	0	0	0	0	164370	0	By matching	By matching	By matching	By matching	By matching	By matching	By MS/MS	By matching	By matching	By matching	By matching	By MS/MS	By matching
ELQLVETGGGLIQPGGSLR	gi|371446162	1923.04	962.521	2	84.159	19	0	Unmodified	0	0	0	0	0	703820	0	0	0	0	0	0	0	0	0	0	0	0	0	0	0	0	0	0	0	0	860130	0	By matching	By matching	By matching	By matching	By matching	By matching	By matching	By matching	By matching	By matching	By matching	By matching	By matching
ELRLVESGGGLVQPGGSLR	gi|519672338	1923.05	962.527	2	84.208	19	1	Unmodified	0	0	0	0	0	0	0	0	0	0	0	0	0	0	0	0	0	0	0	0	0	0	0	0	0	0	0	0	By matching	By matching	By matching	By matching	By matching	By matching	By matching	By matching	By matching	By matching	By matching	By matching	By matching
ELTLTQSPATLSLSPGER	gi|388326595	1898.99	950.497	2	120.39	18	0	Unmodified	0	0	0	2692200	0	0	0	0	0	0	0	0	0	0	644480	0	0	0	0	0	0	0	0	0	0	462620	0	0	By matching	By matching	By matching	By MS/MS	By matching	By matching	By matching	By matching	By matching	By matching	By matching	By matching	By matching
ELTQPSSVSVSPGQTAR	gi|22095265	1742.88	872.44	2	88.283	17	0	Unmodified	0	0	0	0	420030	0	0	0	0	0	0	56963	0	216270	0	0	0	0	0	0	265800	0	0	79745	93070	0	0	78833	By matching	By matching	By matching	By matching	By MS/MS	By matching	By matching	By matching	By matching	By matching	By matching	By matching	By matching
ELVFTQSPATLSVSPGER	gi|339272251	1916.98	959.492	2	112.91	18	0	Unmodified	937120	1240900	1518200	0	3086800	1225300	1396500	0	0	1270900	1076000	1146000	1862400	3398000	1835400	1083800	1309500	1355600	2019200	1186600	1323900	515040	752080	697560	1836100	552130	424270	1541100	By matching	By MS/MS	By MS/MS	By matching	By MS/MS	By MS/MS	By MS/MS	By matching	By matching	By matching	By matching	By matching	By matching
ELVLTQSPATLSASPGER	gi|130381779	1854.97	928.484	2	69.379	18	0	Unmodified	0	0	0	0	0	1399700	156550	0	0	0	0	0	0	0	0	0	0	0	0	0	0	0	0	0	0	0	0	0	By matching	By matching	By matching	By matching	By matching	By MS/MS	By matching	By matching	By matching	By matching	By matching	By matching	By matching
ELVLTQSPATLSLSPGER	gi|339272255	1897.02	949.508	2	307.57	18	0	Unmodified	39102000	70322000	43655000	82162000	77998000	91357000	62804000	50924000	78649000	81486000	132720000	58667000	66277000	84725000	37681000	43239000	51365000	39064000	38291000	48300000	51284000	59972000	33514000	53384000	24434000	59340000	25509000	43614000	By MS/MS	By MS/MS	By MS/MS	By MS/MS	By MS/MS	By MS/MS	By MS/MS	By MS/MS	By MS/MS	By MS/MS	By MS/MS	By MS/MS	By MS/MS
ELVLTQSPGTLSLSAGER	gi|83754224	1856.98	929.492	2	143.99	18	0	Unmodified	0	0	0	10927000	0	1539600	1698700	0	0	0	0	0	0	0	0	675560	0	0	0	5576000	0	1284400	0	0	0	0	437660	0	By matching	By matching	By matching	By MS/MS	By matching	By MS/MS	By matching	By matching	By matching	By matching	By matching	By matching	By matching
ELVLTQSPGTLSLSPGER	gi|61970173	1883	942.5	2	327.27	18	0	Unmodified	138870000	118000000	99128000	185180000	177810000	138610000	135170000	98240000	236240000	119250000	153390000	149830000	158970000	238450000	109100000	106020000	161830000	90008000	8227700	125690000	131590000	118890000	80281000	2441700	65586000	155180000	74618000	101080000	By MS/MS	By MS/MS	By MS/MS	By MS/MS	By MS/MS	By MS/MS	By MS/MS	By MS/MS	By MS/MS	By MS/MS	By MS/MS	By MS/MS	By MS/MS
ELVLTQSPGTLSVSPGER	gi|306960	1868.98	935.492	2	242.09	18	0	Unmodified	4030800	1566000	1919400	0	5022700	3907200	2647800	2089800	5110400	0	2786100	5845100	3028700	4705500	0	2932800	5877500	1343100	2525200	481450	0	2552200	2173100	1936200	1888900	2575100	3121200	2801500	By MS/MS	By MS/MS	By MS/MS	By matching	By MS/MS	By MS/MS	By MS/MS	By MS/MS	By MS/MS	By matching	By MS/MS	By MS/MS	By MS/MS
ELVMTQSPATLSLSPGER	gi|50871688	1914.97	958.486	2	150.91	18	0	Unmodified	0	153410	0	0	2007800	2392700	0	0	0	0	0	0	883110	0	0	0	0	0	0	0	0	0	0	0	0	0	0	0	By matching	By matching	By matching	By matching	By MS/MS	By MS/MS	By matching	By matching	By matching	By matching	By matching	By matching	By MS/MS
ELVMTQSPATLSVSPGER	gi|37728242	1900.96	951.478	2	281.65	18	0	Unmodified	13532000	11709000	7113200	27894000	14748000	15270000	5551100	2393700	18762000	5235200	7415200	5495900	8125900	13516000	2059900	0	0	0	3460700	3221100	699110	2938000	3085300	1152400	1395400	0	0	0	By MS/MS	By MS/MS	By MS/MS	By MS/MS	By MS/MS	By MS/MS	By MS/MS	By matching	By MS/MS	By MS/MS	By MS/MS	By MS/MS	By MS/MS
EMLLVESGGGLVQPGGSLR	gi|519672784	1897.99	949.997	2	104.81	19	0	Unmodified	0	0	0	0	0	0	0	0	0	0	0	0	0	1616300	0	1176100	0	0	0	0	0	0	0	0	0	0	0	0	By matching	By matching	By matching	By matching	By matching	By matching	By matching	By matching	By matching	By matching	By matching	By matching	By matching
EMQLLESGGGLVQPGGSLR	gi|371446899	1926.98	964.492	2	172.5	19	0	Unmodified	0	469970	338780	884300	793520	265450	0	0	3241100	0	0	0	513960	0	0	0	0	0	0	0	0	0	0	0	0	0	0	0	By matching	By MS/MS	By matching	By matching	By matching	By matching	By matching	By matching	By MS/MS	By matching	By matching	By matching	By matching
EMQLVESGGVVVQPGGSLR	gi|247424967	1941	971.5	2	129.43	19	0	Unmodified	0	0	0	0	0	4400900	0	0	0	0	0	0	0	0	0	0	0	0	0	0	0	0	0	0	0	0	0	0	By matching	By matching	By matching	By matching	By matching	By MS/MS	By matching	By matching	By matching	By matching	By matching	By matching	By matching
ENFLFLTPDCK	gi|194391084	1382.65	692.327	2	138.89	11	0	Unmodified	746300	494230	345990	0	0	0	0	0	0	0	321710	0	194840	0	0	415040	505670	513580	0	148100	0	0	0	0	0	0	0	148660	By MS/MS	By MS/MS	By MS/MS	By matching	By matching	By matching	By matching	By matching	By matching	By matching	By matching	By matching	By matching
ENVLTQSPGTLSLSPGER	gi|630869153	1883.96	942.979	2	227.09	18	0	Unmodified	2771800	5931800	2580700	2453800	3130800	5522600	3352900	2678400	6173100	3999300	3292200	3437100	3665300	4554900	7862100	2613900	3822800	3315800	2966700	3647700	4924900	2936900	0	2198100	2076000	3851200	2332500	3032500	By MS/MS	By MS/MS	By MS/MS	By MS/MS	By MS/MS	By MS/MS	By MS/MS	By MS/MS	By MS/MS	By MS/MS	By MS/MS	By MS/MS	By MS/MS
EPFDLWGQGTLVTVSSASTK	gi|304563878	2122.06	1062.03	2	171.3	20	0	Unmodified	0	0	0	0	71682	0	0	0	0	0	0	0	0	0	0	0	0	0	0	1002500	0	0	0	0	0	0	0	0	By matching	By matching	By matching	By matching	By matching	By matching	By matching	By matching	By matching	By matching	By matching	By matching	By matching
EPQVYTLPPSR	gi|166007177	1285.67	643.833	2	92.247	11	0	Unmodified	1171600	490320	1237300	758830	1282200	0	0	889810	1104700	824970	0	0	0	0	651160	417310	629620	0	0	0	504010	0	557940	0	0	655980	0	0	By MS/MS	By matching	By MS/MS	By MS/MS	By MS/MS	By matching	By matching	By matching	By MS/MS	By matching	By matching	By matching	By matching
EQLGEFYEALDCLR	gi|323714410	1741.8	871.899	2	123.76	14	0	Unmodified	0	0	387900	0	0	0	0	0	252920	541900	0	0	0	0	957330	0	849640	117640	0	287630	626960	0	0	484440	544880	0	555940	0	By matching	By matching	By matching	By matching	By matching	By matching	By matching	By matching	By matching	By MS/MS	By matching	By matching	By matching
EQLGPVTQEFWDNLEK	gi|90108666	1931.93	966.963	2	142.39	16	0	Unmodified	841710	1434600	572600	0	1110000	653670	991770	1267800	601390	1737300	811630	830940	532080	1252900	1198600	1499800	1172900	1093000	2058700	1330800	967820	537560	505880	1153900	543060	0	482400	923450	By MS/MS	By MS/MS	By MS/MS	By matching	By MS/MS	By MS/MS	By MS/MS	By MS/MS	By MS/MS	By MS/MS	By MS/MS	By MS/MS	By MS/MS
ERPSGIPER	gi|3142602	1039.54	520.771	2	89.08	9	1	Unmodified	0	0	0	0	0	100350	0	0	89327	0	89239	0	0	0	252870	135450	0	49598	0	0	0	0	106230	0	0	105740	0	0	By matching	By matching	By matching	By matching	By matching	By MS/MS	By matching	By matching	By matching	By matching	By matching	By matching	By matching
ERQLVESGGGLVQPGGSLR	gi|33319558	1938.03	970.014	2	113.33	19	1	Unmodified	0	0	0	0	0	0	0	0	0	0	0	0	0	0	0	0	0	0	0	0	0	0	0	0	0	1175000	0	0	By matching	By matching	By matching	By matching	By matching	By matching	By matching	By matching	By matching	By matching	By matching	By matching	By matching
ESGGGLVQPGGSLR	gi|93007497	1312.67	657.337	2	92.269	14	0	Unmodified	0	183500	0	124750	405820	488600	89902	146680	839510	154550	187000	213500	827490	0	150680	0	0	229180	188430	0	0	167870	388540	0	166530	0	148730	240510	By matching	By matching	By matching	By matching	By matching	By matching	By matching	By matching	By MS/MS	By matching	By matching	By matching	By MS/MS
ESGVPDRFSGSGSGTDFTLTISR	gi|507342	2372.12	791.708	3	71.001	23	1	Unmodified	0	0	1100400	0	533140	0	450290	0	0	0	0	394220	469770	0	0	706470	0	0	0	0	0	0	0	0	440560	0	0	0	By matching	By matching	By MS/MS	By matching	By matching	By matching	By matching	By matching	By matching	By matching	By matching	By matching	By matching
ESVLSQSPATLSLSPGER	gi|700652540	1856.95	929.474	2	152.68	18	0	Unmodified	0	533360	0	0	0	0	0	2172200	2506700	0	0	0	0	0	0	721470	377550	0	0	0	0	430290	0	800110	0	0	558950	0	By MS/MS	By matching	By matching	By matching	By matching	By matching	By matching	By MS/MS	By MS/MS	By matching	By matching	By matching	By matching
ETVLTQSPATLSLSPGER	gi|700652570	1884.98	943.49	2	178.23	18	0	Unmodified	0	0	0	0	0	0	0	2638900	0	0	0	1465600	0	0	0	1442600	1170800	0	27786000	0	2043600	0	9427800	0	0	0	815660	1306200	By matching	By matching	By matching	By matching	By matching	By matching	By matching	By MS/MS	By matching	By MS/MS	By matching	By MS/MS	By matching
ETVLTQSPDTLSLSPGER	gi|662564761	1928.97	965.485	2	168.64	18	0	Unmodified	1325000	114290	0	0	0	316240	192000	0	1540700	1044800	181690	128830	0	0	0	0	335270	482420	0	276250	201310	197830	704700	505790	0	0	0	0	By MS/MS	By matching	By matching	By matching	By matching	By matching	By matching	By matching	By MS/MS	By MS/MS	By matching	By matching	By matching
ETVLTQSPGTLSLSPGER	gi|694269986	1870.96	936.482	2	256.89	18	0	Unmodified	3223500	3380700	1828100	0	4728400	2946900	3182600	2609400	6219300	4114100	3087300	2726600	2904800	3945000	0	3630300	5183400	1983100	4328100	4292400	4367800	2159000	2056300	2171300	1851000	2126200	564840	3765900	By MS/MS	By MS/MS	By MS/MS	By matching	By MS/MS	By MS/MS	By MS/MS	By MS/MS	By MS/MS	By MS/MS	By MS/MS	By MS/MS	By MS/MS
EVAAPSVFIFPPSDEQLK	gi|255311843	1973.01	987.507	2	81.51	18	0	Unmodified	0	0	0	0	0	0	321020	0	535460	0	0	0	164470	400150	0	0	210130	0	130900	0	0	355580	0	0	0	0	0	0	By matching	By matching	By matching	By matching	By matching	By matching	By matching	By matching	By MS/MS	By matching	By matching	By matching	By matching
EVELLESGGDLVQPGGSLR	gi|157058713	1954	978	2	87.668	19	0	Unmodified	0	0	0	0	639690	0	0	0	1012800	0	0	335210	0	0	292690	0	0	0	0	0	0	184740	0	0	0	0	541690	0	By matching	By matching	By matching	By matching	By matching	By matching	By matching	By matching	By MS/MS	By matching	By matching	By matching	By matching
EVELLESGGGLVQPGGSLR	gi|157058679	1896	948.998	2	135.36	19	0	Unmodified	0	1685500	0	0	0	0	0	0	0	0	0	0	0	1564300	0	0	1976900	0	0	0	1434900	1186700	0	0	0	0	1709500	1703100	By matching	By MS/MS	By matching	By matching	By matching	By matching	By matching	By matching	By matching	By matching	By matching	By matching	By matching
EVELVESGGGLVKPGGSLR	gi|371447563	1882.02	942.008	2	180.32	19	1	Unmodified	424960	278110	0	0	0	1821700	0	778080	0	0	0	107670	605320	0	0	0	0	0	0	0	0	296770	0	2655900	0	0	803730	0	By matching	By matching	By matching	By matching	By matching	By MS/MS	By matching	By MS/MS	By matching	By matching	By matching	By matching	By matching
EVELVESGGGLVQPGGSLR	gi|662565199	1881.98	941.99	2	92.679	19	0	Unmodified	0	430520	536470	0	0	0	0	0	0	0	369160	374090	0	0	562200	0	250200	0	0	0	0	0	0	0	0	0	0	0	By matching	By MS/MS	By MS/MS	By matching	By matching	By matching	By matching	By matching	By matching	By matching	By matching	By matching	By matching
EVELVESGGGLVQPGR	gi|371446071	1624.84	813.421	2	80.387	16	0	Unmodified	0	0	0	0	0	0	0	0	0	648120	0	0	0	0	0	0	0	309840	0	0	0	0	0	807700	0	0	0	0	By matching	By matching	By matching	By matching	By matching	By matching	By matching	By matching	By matching	By MS/MS	By matching	By matching	By matching
EVELVETGGAVVQPGGSLR	gi|519673104	1896	948.998	2	118.72	19	0	Unmodified	0	0	0	0	2894900	0	0	0	0	0	0	0	0	0	0	0	0	0	0	0	0	0	0	0	0	0	1709500	0	By matching	By matching	By matching	By matching	By MS/MS	By matching	By matching	By matching	By matching	By matching	By matching	By matching	By matching
EVELVQSGAEVK	gi|49354795	1286.67	644.336	2	198.52	12	0	Unmodified	0	0	0	0	0	451210	270260	257620	1112500	313380	0	0	0	0	408430	0	399200	0	0	168770	0	0	73842	0	0	0	0	139050	By matching	By matching	By matching	By matching	By matching	By MS/MS	By matching	By matching	By MS/MS	By MS/MS	By matching	By matching	By matching
EVHLLDSGGGLVQPGGSLR	gi|519673066	1890	945.998	2	150.59	19	0	Unmodified	0	0	0	8190600	0	0	0	0	0	0	0	0	2182200	0	0	0	0	840820	0	0	0	846530	0	0	530820	0	65045	0	By matching	By matching	By matching	By MS/MS	By matching	By matching	By matching	By matching	By matching	By matching	By matching	By matching	By MS/MS
EVHLLESGGDLVQPGGSLR	gi|379317427	1962.02	655.006	3	109.36	19	0	Unmodified	0	0	260940	0	273080	233350	0	0	0	0	0	0	0	0	0	0	0	0	0	0	0	0	258130	0	0	0	561090	0	By matching	By matching	By matching	By matching	By matching	By matching	By matching	By matching	By matching	By matching	By matching	By matching	By matching
EVHLLESGGGLAQPGGSLR	gi|32452727	1875.98	938.99	2	171.33	19	0	Unmodified	0	0	0	2835200	331400	0	0	0	0	0	0	141180	0	0	0	0	0	0	0	0	0	0	0	0	0	0	0	0	By matching	By matching	By matching	By MS/MS	By matching	By matching	By matching	By matching	By matching	By matching	By matching	By matching	By matching
EVHLLESGGGLVEPGGSLR	gi|519672694	1905	953.498	2	140.3	19	0	Unmodified	0	0	0	0	0	0	0	0	0	0	0	0	0	0	0	0	0	0	0	0	0	0	0	0	0	0	0	0	By matching	By matching	By matching	By matching	By matching	By matching	By matching	By matching	By matching	By matching	By matching	By matching	By matching
EVHLLESGGGLVQPGGSLR	gi|247425500	1904.01	953.006	2	243.61	19	0	Unmodified	0	2698900	3149600	1451800	4027400	1280700	1307700	975980	1270100	507240	1515900	4041400	4388700	1793200	1243400	258760	2339700	2611200	2842600	0	3260000	1955000	1900700	0	485140	2567900	1927700	593450	By matching	By MS/MS	By MS/MS	By matching	By MS/MS	By matching	By MS/MS	By MS/MS	By MS/MS	By MS/MS	By MS/MS	By MS/MS	By MS/MS
EVHLVESGGALVQPGGSLR	gi|519673898	1904.01	635.671	3	162.76	19	0	Unmodified	0	1325100	0	0	1906100	1312000	732270	573400	866080	507240	1515900	1953600	2133000	1510300	774770	0	2257000	1344200	1269400	454350	1980600	1017100	915250	0	0	430830	0	593450	By matching	By MS/MS	By matching	By matching	By MS/MS	By MS/MS	By MS/MS	By MS/MS	By MS/MS	By MS/MS	By MS/MS	By MS/MS	By MS/MS
EVHLVESGGDLVQPGGSLR	gi|247424272	1948	975.001	2	260.44	19	0	Unmodified	2734800	125710	490050	0	0	0	271490	176840	788340	0	185200	201930	250200	825070	0	321770	0	0	351790	0	1064200	0	294070	4143000	360140	0	0	196550	By MS/MS	By matching	By matching	By matching	By matching	By matching	By matching	By matching	By matching	By matching	By matching	By matching	By matching
EVHLVESGGDLVQPGR	gi|519672204	1690.86	846.432	2	107.74	16	0	Unmodified	9004900	10243000	9386700	9183100	8130900	12209000	12399000	10556000	12697000	11459000	10329000	11271000	8153600	16497000	12398000	9750600	15456000	12192000	17346000	7094700	9185900	6086700	5771600	8175000	8051600	10026000	7837700	14336000	By matching	By matching	By matching	By matching	By matching	By matching	By MS/MS	By matching	By matching	By matching	By matching	By matching	By matching
EVHLVESGGGLIQPGGSLR	gi|371446290	1904.01	953.006	2	202.96	19	0	Unmodified	168600	691550	0	81073	1683500	1108100	0	776930	163800	0	490560	94488	733120	0	0	808100	469900	526240	523520	0	761080	0	0	476070	0	3665900	0	138660	By matching	By matching	By matching	By matching	By MS/MS	By matching	By matching	By matching	By matching	By matching	By matching	By matching	By matching
EVHLVESGGGLVKPGGSLR	gi|519672968	1890.03	946.016	2	209.19	19	1	Unmodified	2203200	2020200	2254000	1477200	3048400	3397300	2219900	1113000	1254200	652000	2857900	2264700	505070	2559900	3165700	2482500	1587200	1411200	2023500	457400	1270000	778290	1960600	1532600	736780	4007000	314940	1716600	By MS/MS	By MS/MS	By MS/MS	By matching	By MS/MS	By MS/MS	By MS/MS	By MS/MS	By MS/MS	By MS/MS	By MS/MS	By MS/MS	By matching
EVHLVESGGGLVQPGGSLR	gi|247424344	1890	945.998	2	264.01	19	0	Unmodified	2935300	2722100	1693200	0	2142400	4409600	1377900	2212300	1740600	1915500	2925400	4770800	2681200	2852200	1715600	3303200	4697600	2364900	1929700	1152100	1760200	1599200	1155600	3225600	823880	1728500	2213600	1125400	By MS/MS	By MS/MS	By MS/MS	By matching	By MS/MS	By MS/MS	By MS/MS	By MS/MS	By MS/MS	By MS/MS	By MS/MS	By MS/MS	By MS/MS
EVHLVESGGGLVQPGR	gi|700653217	1632.86	545.286	3	68.262	16	0	Unmodified	165360	134640	0	132670	245610	216090	336600	157410	494900	186860	105880	232560	294300	429540	231920	331790	68955	0	197270	45753	396450	226710	60917	280400	128770	230840	133370	264070	By matching	By matching	By matching	By matching	By matching	By matching	By MS/MS	By matching	By MS/MS	By matching	By matching	By matching	By MS/MS
EVHLVESGGGLVQSGGSLR	gi|33319660	1879.98	940.988	2	176.11	19	0	Unmodified	236130	0	0	0	0	0	804440	96793	0	0	0	0	0	0	0	0	0	0	0	0	0	0	0	0	0	0	0	0	By matching	By matching	By matching	By matching	By matching	By matching	By MS/MS	By matching	By matching	By matching	By matching	By matching	By matching
EVHLVQSGAEVK	gi|225801	1294.69	648.344	2	162.49	12	0	Unmodified	403740	311300	493140	0	646110	317760	516340	282880	743150	329490	436640	423160	246030	395830	414860	679430	321630	152420	603230	268070	213030	324230	326040	216020	547100	304630	0	462650	By MS/MS	By MS/MS	By MS/MS	By matching	By MS/MS	By MS/MS	By MS/MS	By MS/MS	By MS/MS	By MS/MS	By MS/MS	By MS/MS	By MS/MS
EVHVLESGGGLVQPGGSLR	gi|519671982	1890	630.999	3	165.24	19	0	Unmodified	2372300	1843400	1792200	8863700	1587500	1872600	1026900	1556000	1439900	1259200	2166900	2106800	2182200	2273100	1334000	2686300	1965500	0	1299100	1132100	1336100	0	1264900	2722600	530820	1497700	908300	831460	By MS/MS	By MS/MS	By MS/MS	By MS/MS	By MS/MS	By MS/MS	By MS/MS	By MS/MS	By MS/MS	By MS/MS	By MS/MS	By MS/MS	By MS/MS
EVKLVESGGALVQPGGSLR	gi|371446751	1895.05	948.524	2	147.1	19	1	Unmodified	649980	499130	988930	0	816660	297980	558120	1545800	0	376700	0	527610	292890	765610	399800	723710	0	723530	0	0	0	0	476660	861380	282030	1131700	0	341770	By matching	By matching	By matching	By matching	By matching	By matching	By matching	By MS/MS	By matching	By matching	By matching	By matching	By matching
EVKLVESGGGLVQPGGSLR	gi|519672548	1881.03	941.516	2	267.69	19	1	Unmodified	47671000	46862000	56071000	8123800	77596000	45945000	46935000	45760000	44844000	36796000	48399000	12967000	49390000	60698000	37657000	35675000	46798000	44362000	40045000	26960000	49305000	26290000	28633000	29461000	26357000	60673000	36901000	38351000	By MS/MS	By MS/MS	By MS/MS	By MS/MS	By MS/MS	By MS/MS	By MS/MS	By MS/MS	By MS/MS	By MS/MS	By MS/MS	By MS/MS	By MS/MS
EVKLVESGGGLVQPGR	gi|519672982	1623.89	812.947	2	195.5	16	1	Unmodified	604930	2669200	826630	0	2956800	3027500	323550	6716600	2459200	1752000	2666000	432140	191300	244570	1621800	1011200	462930	1066000	376450	0	2305700	0	0	2765900	949150	3416700	148720	164970	By matching	By MS/MS	By matching	By matching	By MS/MS	By MS/MS	By matching	By MS/MS	By MS/MS	By MS/MS	By MS/MS	By matching	By matching
EVKVEESGGGLVQPGGSLR	gi|33319586	1896.99	949.495	2	152.13	19	1	Unmodified	0	0	0	0	0	0	0	0	0	0	0	0	0	0	0	0	0	0	0	0	0	0	0	0	0	0	4824600	0	By matching	By matching	By matching	By matching	By matching	By matching	By matching	By matching	By matching	By matching	By matching	By matching	By matching
EVKVVESGGGLVQPGGSLR	gi|662563325	1867.02	934.508	2	203.89	19	1	Unmodified	1821300	2097000	3350800	424210	903600	891430	1470100	645850	1373100	0	4273000	966900	818060	852760	503130	718440	0	0	0	187730	514020	692190	362140	0	725200	528910	373700	908280	By MS/MS	By MS/MS	By MS/MS	By matching	By MS/MS	By MS/MS	By MS/MS	By MS/MS	By MS/MS	By matching	By MS/MS	By MS/MS	By MS/MS
EVLLLESGGDLVQPGGSLR	gi|519672118	1938.04	970.021	2	103.73	19	0	Unmodified	0	0	0	0	0	0	0	0	0	0	0	897550	0	0	230340	0	0	0	0	0	0	0	0	0	0	0	0	0	By matching	By matching	By matching	By matching	By matching	By matching	By matching	By matching	By matching	By matching	By matching	By MS/MS	By matching
EVLLLESGGGLVQPGGSLR	gi|33319164	1880.04	941.018	2	120.11	19	0	Unmodified	0	0	0	0	846790	795190	0	0	0	0	593340	0	907560	0	0	0	660080	0	466150	0	0	0	0	0	0	579740	738650	0	By matching	By matching	By matching	By matching	By MS/MS	By MS/MS	By matching	By matching	By matching	By matching	By matching	By matching	By MS/MS
EVLLLQSGGGLVQPGGSLR	gi|519672926	1879.05	940.526	2	102.67	19	0	Unmodified	0	0	0	0	637080	0	0	0	0	0	0	0	0	0	0	0	0	0	0	0	0	0	0	0	0	0	0	0	By matching	By matching	By matching	By matching	By MS/MS	By matching	By matching	By matching	By matching	By matching	By matching	By matching	By matching
EVLLTQSPGTLSLSPGER	gi|453071222	1883	942.5	2	228.26	18	0	Unmodified	8286000	5649000	6196200	5939000	0	8229700	13294000	4856700	6855100	2820700	4726900	3394900	12786000	5785500	106410000	116950000	3948100	1790600	132080000	4505900	4942600	2852700	1389600	119110000	916090	0	1226200	10045000	By MS/MS	By MS/MS	By MS/MS	By matching	By matching	By MS/MS	By MS/MS	By MS/MS	By matching	By matching	By matching	By matching	By MS/MS
EVLLVESGGGLVKPGGSLR	gi|2072264	1866.06	623.019	3	162.46	19	1	Unmodified	0	573080	0	2096600	0	357850	0	0	0	0	0	0	0	0	0	0	0	211010	0	0	0	0	0	316310	0	0	0	0	By matching	By matching	By matching	By MS/MS	By matching	By matching	By matching	By matching	By matching	By matching	By matching	By matching	By matching
EVLLVESGGGLVQPGGSLR	gi|47846461	1866.02	934.011	2	160.47	19	0	Unmodified	120420	642010	399570	491820	0	1332500	602200	630520	2300500	5325600	0	0	887250	1463900	923500	1893600	1507200	838640	1050400	733550	1029900	446090	0	2229000	315190	0	1194300	0	By matching	By MS/MS	By matching	By matching	By matching	By MS/MS	By matching	By MS/MS	By MS/MS	By MS/MS	By matching	By matching	By matching
EVLLVESGGGLVQPGR	gi|700653016	1608.88	805.442	2	76.358	16	0	Unmodified	0	0	0	0	0	0	0	0	0	0	0	0	0	0	0	0	0	0	0	0	0	0	0	481840	0	437680	0	0	By matching	By matching	By matching	By matching	By matching	By matching	By matching	By matching	By matching	By matching	By matching	By matching	By matching
EVLMTQSPATLSVSPGER	gi|662564962	1900.96	951.478	2	183.71	18	0	Unmodified	0	10218000	5714500	27684000	12204000	0	0	0	15118000	4020100	5519200	0	7823800	11580000	0	1231500	3052300	1648100	1138600	3090000	3291400	0	2351500	0	300320	1641700	1069700	1341800	By matching	By MS/MS	By MS/MS	By MS/MS	By MS/MS	By matching	By matching	By matching	By MS/MS	By MS/MS	By MS/MS	By matching	By MS/MS
EVNLVESGGDLVQPGGSLR	gi|59709542	1924.99	963.493	2	93.255	19	0	Unmodified	0	0	0	0	0	0	0	0	0	0	0	0	0	0	0	0	0	0	0	0	4840500	0	0	0	0	0	0	0	By matching	By matching	By matching	By matching	By matching	By matching	By matching	By matching	By matching	By matching	By matching	By matching	By matching
EVNLVESGGGLVQPGGSLK	gi|1942053	1838.97	920.487	2	154.07	19	0	Unmodified	458000	347710	0	317210	0	0	0	0	0	0	216680	0	0	0	0	816300	0	0	0	0	0	0	0	0	0	0	0	0	By matching	By matching	By matching	By matching	By matching	By matching	By matching	By matching	By matching	By matching	By matching	By matching	By matching
EVPLLDSGGDLVQPGGSLR	gi|264657927	1908	954.998	2	58.01	19	0	Unmodified	0	0	0	6246400	0	0	0	0	0	0	0	0	0	0	0	0	0	0	0	0	0	0	0	0	0	0	0	0	By matching	By matching	By matching	By MS/MS	By matching	By matching	By matching	By matching	By matching	By matching	By matching	By matching	By matching
EVPLLESGGGLVQPGGSLR	gi|247425380	1864.01	622.335	3	103.67	19	0	Unmodified	0	0	0	0	0	0	0	0	0	0	0	0	0	0	0	0	0	0	0	0	0	0	0	0	0	948660	0	0	By matching	By matching	By matching	By matching	By matching	By matching	By matching	By matching	By matching	By matching	By matching	By matching	By matching
EVPLNTIIFMGR	gi|530364787	1388.75	695.374	2	90.614	12	0	Unmodified	0	0	0	0	0	0	120240	245710	0	0	0	0	0	190980	225660	0	94072	0	0	0	0	0	0	0	0	0	121810	0	By matching	By matching	By matching	By matching	By matching	By matching	By matching	By MS/MS	By matching	By matching	By matching	By matching	By matching
EVQLADSGGGLVQPGGSLR	gi|519672940	1838.95	920.474	2	83.948	19	0	Unmodified	1065200	0	0	0	0	256700	329550	243030	0	728180	405370	232430	0	728960	0	0	1222300	0	454650	0	298080	0	0	0	977430	184100	518900	166380	By MS/MS	By matching	By matching	By matching	By matching	By matching	By matching	By matching	By matching	By matching	By matching	By matching	By matching
EVQLAESGGGLIQPGGSLR	gi|662565092	1866.98	934.49	2	213.01	19	0	Unmodified	0	0	0	0	3976400	0	0	0	0	0	0	0	0	0	0	0	0	0	0	0	0	0	0	0	0	4547200	0	824640	By matching	By matching	By matching	By matching	By MS/MS	By matching	By matching	By matching	By matching	By matching	By matching	By matching	By matching
EVQLAESGGGLVKPGESLR	gi|33319090	1925.02	963.511	2	107.06	19	1	Unmodified	0	118060	0	103480	345100	0	0	0	2077400	0	0	0	0	0	0	0	188990	320010	102560	0	0	0	0	0	161390	0	0	0	By matching	By matching	By matching	By matching	By matching	By matching	By matching	By matching	By MS/MS	By matching	By matching	By matching	By matching
EVQLAESGGGLVKPGGSLR	gi|519673440	1853	927.5	2	171.3	19	1	Unmodified	2444500	1324000	3060000	1456500	1800300	62614000	1050600	0	2833200	1124000	0	0	0	1952200	2298400	463200	1011300	464750	1020400	565110	988970	991520	0	0	0	0	220570	1862900	By MS/MS	By MS/MS	By MS/MS	By matching	By MS/MS	By MS/MS	By matching	By matching	By MS/MS	By MS/MS	By matching	By matching	By matching
EVQLAESGGGLVQPGGSLR	gi|47846717	1852.96	927.482	2	176.67	19	0	Unmodified	6918700	4489400	3305500	476800	4904600	2305000	4345400	4834000	5657600	4639900	120350	3056400	4473900	13342000	3166400	7389700	4279200	2887600	4457900	7822700	1104500	2375900	2745500	3994400	0	3755000	2400800	2536700	By MS/MS	By MS/MS	By MS/MS	By matching	By MS/MS	By MS/MS	By MS/MS	By MS/MS	By MS/MS	By MS/MS	By matching	By MS/MS	By MS/MS
EVQLAESGGGLVQPGR	gi|519672664	1595.83	798.913	2	160.81	16	0	Unmodified	0	0	148460	591790	798260	0	1627700	540090	669350	0	9915500	0	743470	1637500	983900	755290	0	505030	0	322020	1033200	0	0	892600	491060	569290	0	0	By matching	By matching	By matching	By MS/MS	By MS/MS	By matching	By MS/MS	By MS/MS	By MS/MS	By matching	By MS/MS	By matching	By MS/MS
EVQLAQSGAEVK	gi|58222313	1257.66	629.828	2	194.3	12	0	Unmodified	834250	181860	607220	0	561920	471640	378400	572860	817360	0	260510	363220	467650	1541200	771530	999410	251720	149380	312640	5500400	308040	178950	622710	183410	260360	197280	67852	625540	By MS/MS	By matching	By matching	By matching	By matching	By matching	By matching	By matching	By matching	By matching	By matching	By MS/MS	By MS/MS
EVQLEESGGDLVQPGGSLR	gi|33319576	1968.98	985.488	2	91.926	19	0	Unmodified	613090	479470	0	0	0	0	0	0	701940	253820	0	0	0	0	310820	0	0	0	335430	0	308870	318850	0	573430	381820	0	346810	0	By matching	By matching	By matching	By matching	By matching	By matching	By matching	By matching	By MS/MS	By matching	By matching	By matching	By matching
EVQLEESGGGLVKPGGSLR	gi|218454114	1911.01	956.503	2	203.17	19	1	Unmodified	0	0	1348600	0	0	1573600	0	0	0	0	0	1195000	0	0	1300400	0	1917800	0	0	0	0	519110	0	861730	0	939020	1710400	0	By matching	By matching	By MS/MS	By matching	By matching	By MS/MS	By matching	By matching	By matching	By matching	By matching	By MS/MS	By matching
EVQLEESGGGLVQPGGSLR	gi|218454118	1910.97	956.485	2	236.66	19	0	Unmodified	576900	4029800	3374400	0	8545800	4873300	6599500	257650	1640700	5411400	3018800	3649900	10287000	1201700	3150100	5841500	322210	521270	2279300	258780	1131500	4471500	2711400	5186200	4579900	1139700	4667800	4497100	By MS/MS	By MS/MS	By MS/MS	By matching	By MS/MS	By MS/MS	By MS/MS	By matching	By matching	By MS/MS	By MS/MS	By MS/MS	By MS/MS
EVQLEESGGGLVQPGR	gi|77158015	1653.83	827.916	2	142.91	16	0	Unmodified	0	378100	166630	467820	0	708380	0	560310	0	0	0	1006900	0	83923	686640	1145700	0	592870	0	0	0	879350	255590	1249700	498680	853830	1020900	454970	By matching	By MS/MS	By matching	By matching	By matching	By MS/MS	By matching	By MS/MS	By matching	By matching	By matching	By MS/MS	By matching
EVQLEESGGGVVQPGGSLR	gi|371446653	1896.95	949.477	2	100.07	19	0	Unmodified	0	0	0	0	0	0	0	0	0	0	0	0	0	0	0	0	0	921700	0	0	0	0	0	0	0	0	0	0	By matching	By matching	By matching	By matching	By matching	By matching	By matching	By matching	By matching	By matching	By matching	By matching	By matching
EVQLEQSGAEVK	gi|4097066	1315.66	658.831	2	263.89	12	0	Unmodified	1193100	369300	1095700	617940	1021200	904570	367500	0	0	1799000	0	0	0	0	0	1890500	824620	0	0	3811700	0	370820	713270	598070	0	0	394470	0	By MS/MS	By MS/MS	By MS/MS	By matching	By matching	By MS/MS	By MS/MS	By matching	By matching	By MS/MS	By matching	By matching	By matching
EVQLEQSGGGLLQPGGSLR	gi|77158017	1924	963.001	2	65.423	19	0	Unmodified	0	0	0	0	0	0	0	0	0	0	0	0	0	0	0	919070	0	0	0	0	0	0	0	0	0	0	0	0	By matching	By matching	By matching	By matching	By matching	By matching	By matching	By matching	By matching	By matching	By matching	By matching	By matching
EVQLFESGGGLVQPGGSLR	gi|247425460	1929	965.498	2	97.256	19	0	Unmodified	0	245030	0	0	0	0	904200	0	0	0	0	0	0	324370	311610	0	218940	0	0	0	0	258740	0	0	0	0	293410	0	By matching	By matching	By matching	By matching	By matching	By matching	By MS/MS	By matching	By matching	By matching	By matching	By matching	By matching
EVQLLASGGGLVQPGGSLR	gi|247425117	1837.01	919.503	2	121.47	19	0	Unmodified	0	0	0	0	0	0	0	0	0	0	0	0	0	0	0	0	0	0	0	0	0	1370000	0	0	0	0	650460	0	By matching	By matching	By matching	By matching	By matching	By matching	By matching	By matching	By matching	By matching	By matching	By matching	By matching
EVQLLDSGGGLVQPGGSLR	gi|519672270	1881	941.498	2	248.33	19	0	Unmodified	533840	7603800	0	13112000	4362200	4782700	2417300	894300	5419900	3569900	5831600	4020000	6240700	2587900	1895000	0	3053000	2337000	2061400	0	113690000	3130600	3132200	0	1403100	486990	66755000	1949900	By matching	By MS/MS	By matching	By MS/MS	By MS/MS	By MS/MS	By MS/MS	By MS/MS	By MS/MS	By MS/MS	By MS/MS	By MS/MS	By MS/MS
EVQLLESAGGLVKPGGSLR	gi|37014267	1909.06	637.354	3	76.051	19	1	Unmodified	0	0	0	0	0	0	0	0	0	0	0	0	0	0	0	0	0	0	0	0	620160	0	0	0	0	0	0	0	By matching	By matching	By matching	By matching	By matching	By matching	By matching	By matching	By matching	By matching	By matching	By matching	By matching
EVQLLESAGGLVQPGGSLR	gi|2352459	1909.03	955.513	2	106.44	19	0	Unmodified	0	565410	699800	916310	895200	581870	434640	0	670870	0	2340600	955060	0	0	0	0	585500	0	1342300	0	353470	339080	1856400	0	0	0	398110	0	By matching	By MS/MS	By matching	By matching	By matching	By matching	By matching	By matching	By matching	By matching	By matching	By matching	By matching
EVQLLESGAEVK	gi|7438705	1300.69	651.344	2	110.15	12	0	Unmodified	0	0	0	0	0	0	0	0	0	0	0	0	0	0	0	0	0	0	0	0	1055100	0	0	0	0	0	0	0	By matching	By matching	By matching	By matching	By matching	By matching	By matching	By matching	By matching	By matching	By matching	By matching	By matching
EVQLLESGGALVQPGGSLR	gi|662565014	1909.03	955.513	2	166.59	19	0	Unmodified	0	379890	244320	0	4603700	1261100	0	603690	2550900	0	2004300	471470	6489400	2845000	5711000	219820	0	496820	1740400	727610	0	0	2594300	637180	229740	2715200	1725500	3529100	By matching	By matching	By matching	By matching	By MS/MS	By matching	By matching	By matching	By MS/MS	By matching	By matching	By matching	By MS/MS
EVQLLESGGDLGQPGGSLR	gi|519672836	1910.97	956.485	2	65.765	19	0	Unmodified	0	0	0	0	0	0	121380	0	0	0	0	0	0	0	0	0	0	0	259070	0	0	86111	0	0	0	132260	468320	0	By matching	By matching	By matching	By matching	By matching	By matching	By matching	By matching	By matching	By matching	By matching	By matching	By matching
EVQLLESGGDLIQPGGSLR	gi|371445566	1967.03	984.516	2	87.654	19	0	Unmodified	0	0	0	0	0	0	0	0	0	0	0	0	123840	1047500	0	0	0	0	0	0	0	0	0	0	0	0	0	0	By matching	By matching	By matching	By matching	By matching	By matching	By matching	By matching	By matching	By matching	By matching	By matching	By matching
EVQLLESGGDLVQPGGSLR	gi|371445556	1953.02	977.508	2	276.05	19	0	Unmodified	0	10871000	4002500	278220	13257000	6350600	5671300	2600200	7660300	2844800	9205800	7683800	3769400	8511900	8059900	0	7723200	6839200	8351800	4053700	4951800	10361000	7015400	3058500	1670200	20920000	6821500	11628000	By matching	By MS/MS	By MS/MS	By matching	By MS/MS	By MS/MS	By MS/MS	By MS/MS	By MS/MS	By MS/MS	By MS/MS	By MS/MS	By MS/MS
EVQLLESGGDLVRPGGSLR	gi|371446142	1981.06	661.353	3	101.78	19	1	Unmodified	0	0	0	0	0	0	0	0	475480	0	0	0	0	0	0	0	0	0	0	0	0	0	0	0	0	0	0	0	By matching	By matching	By matching	By matching	By matching	By matching	By matching	By matching	By MS/MS	By matching	By matching	By matching	By matching
EVQLLESGGGFLQPGGSLR	gi|371447559	1943.01	972.506	2	47.729	19	0	Unmodified	0	0	0	0	0	0	0	0	0	0	1236100	0	0	0	0	0	0	0	0	0	0	0	0	0	0	846760	0	0	By matching	By matching	By matching	By matching	By matching	By matching	By matching	By matching	By matching	By matching	By MS/MS	By matching	By matching
EVQLLESGGGFVQPGGSLR	gi|247425108	1929	965.498	2	242.9	19	0	Unmodified	0	963770	832030	0	0	3140200	2096300	469780	528510	301360	1873400	1554000	1444700	0	0	0	719970	639970	0	0	2048700	0	0	947340	0	477930	1757600	6017300	By matching	By MS/MS	By matching	By matching	By matching	By MS/MS	By MS/MS	By matching	By matching	By matching	By MS/MS	By MS/MS	By matching
EVQLLESGGGGVQPGR	gi|46093905	1581.81	791.906	2	99.796	16	0	Unmodified	0	0	0	0	0	0	0	0	0	0	0	0	0	0	0	0	0	0	0	0	0	0	0	0	0	0	1982800	0	By matching	By matching	By matching	By matching	By matching	By matching	By matching	By matching	By matching	By matching	By matching	By matching	By matching
EVQLLESGGGLAQPGGSLR	gi|247425018	1866.98	934.49	2	235.26	19	0	Unmodified	0	4765800	3997200	4569300	11315000	0	138740	0	514770	0	4175900	7230700	7342100	0	0	0	7144200	9886900	308750	0	4657700	3546700	4443600	0	0	6468900	7543500	5700200	By matching	By MS/MS	By MS/MS	By MS/MS	By MS/MS	By matching	By matching	By matching	By matching	By matching	By MS/MS	By MS/MS	By MS/MS
EVQLLESGGGLEQPGGSLR	gi|371447697	1924.99	963.493	2	227.57	19	0	Unmodified	0	0	0	0	5385300	0	0	0	0	1171300	0	3440900	0	0	4129900	0	0	0	0	0	0	8334700	0	0	1189000	0	3746900	3429700	By matching	By matching	By matching	By matching	By MS/MS	By matching	By matching	By matching	By matching	By matching	By matching	By MS/MS	By matching
EVQLLESGGGLGQPGGSLR	gi|247425515	1852.96	927.482	2	148.64	19	0	Unmodified	0	2764100	0	0	1719700	0	625240	0	1169500	542720	0	1741000	1031900	1058000	687400	0	1638500	902980	0	0	0	0	0	226570	0	0	1020200	0	By matching	By MS/MS	By matching	By matching	By MS/MS	By matching	By matching	By matching	By MS/MS	By matching	By matching	By MS/MS	By MS/MS
EVQLLESGGGLLQPGGSLR	gi|33319160	1909.03	955.513	2	126.29	19	0	Unmodified	0	0	0	0	4074400	0	0	1255800	0	0	0	4056200	4083800	2387500	432300	580400	590830	560140	611820	0	503330	469780	335560	1526700	0	0	779120	557040	By matching	By matching	By matching	By matching	By MS/MS	By matching	By matching	By MS/MS	By matching	By matching	By matching	By MS/MS	By MS/MS
EVQLLESGGGLR	gi|519673960	1256.67	629.336	2	220.53	12	0	Unmodified	0	0	0	2310900	0	0	0	0	0	0	0	0	0	0	0	0	0	0	0	0	0	0	0	0	0	0	0	0	By matching	By matching	By matching	By MS/MS	By matching	By matching	By matching	By matching	By matching	By matching	By matching	By matching	By matching
EVQLLESGGGLVEPGGSLR	gi|5051064	1896	948.998	2	203.71	19	0	Unmodified	0	1685500	0	1004900	2894900	0	1623400	695990	0	860380	0	3680700	2270400	1564300	0	0	1976900	1737600	1264100	470500	1434900	1186700	899900	0	0	0	0	1703100	By matching	By MS/MS	By matching	By matching	By MS/MS	By matching	By MS/MS	By matching	By matching	By MS/MS	By matching	By MS/MS	By MS/MS
EVQLLESGGGLVHPGGSLR	gi|519673036	1904.01	953.006	2	181.69	19	0	Unmodified	0	2183800	540830	0	2172800	759880	628080	0	0	0	338750	1016600	1083500	271310	0	0	416390	359380	0	265330	0	200080	574160	0	0	880060	1345100	0	By matching	By MS/MS	By matching	By matching	By MS/MS	By matching	By matching	By matching	By matching	By matching	By matching	By matching	By MS/MS
EVQLLESGGGLVKPGGSLR	gi|37014227	1895.05	948.524	2	160.03	19	1	Unmodified	823690	1830200	1746300	597170	1297800	1777300	862430	0	493880	379680	0	3051000	1887400	1636700	1366000	1101400	1524400	816440	0	791900	0	748330	1442000	372840	147520	816030	1116000	0	By matching	By matching	By matching	By matching	By MS/MS	By matching	By matching	By matching	By matching	By matching	By matching	By matching	By matching
EVQLLESGGGLVQPGASLR	gi|388776269	1909.03	955.513	2	65.416	19	0	Unmodified	0	0	0	0	0	0	0	0	2550900	0	0	0	0	0	0	0	0	0	0	0	0	0	0	0	0	0	0	0	By matching	By matching	By matching	By matching	By matching	By matching	By matching	By matching	By MS/MS	By matching	By matching	By matching	By matching
EVQLLESGGGLVQPGESLR	gi|12733976	1967.03	984.516	2	194.15	19	0	Unmodified	0	0	4274700	0	2728700	4970600	0	0	0	0	1580100	3336700	2519600	2563600	1337700	4718200	2200300	0	0	0	1893900	1475400	1544800	0	0	0	1050100	1297300	By matching	By matching	By MS/MS	By matching	By matching	By MS/MS	By matching	By matching	By matching	By matching	By matching	By MS/MS	By matching
EVQLLESGGGLVQPGGSLK	gi|4107066	1867.01	934.503	2	134.04	19	0	Unmodified	0	650780	513190	2439500	2775100	421800	0	464650	862660	1649900	0	0	0	471660	0	0	0	648140	0	0	0	753080	0	0	0	733960	0	546020	By matching	By matching	By matching	By MS/MS	By MS/MS	By matching	By matching	By matching	By matching	By matching	By matching	By matching	By matching
EVQLLESGGGLVQPGGSLR	gi|3152372	1895.01	948.506	2	306.67	19	0	Unmodified	319320	108780000	78454000	30970000	146140000	68630000	75552000	30871000	61352000	37189000	92318000	93505000	176080000	81583000	59592000	4605700	95583000	72431000	91487000	23465000	63193000	79317000	57413000	21578000	29412000	12135000	107780000	72269000	By matching	By MS/MS	By MS/MS	By MS/MS	By MS/MS	By MS/MS	By MS/MS	By MS/MS	By MS/MS	By MS/MS	By MS/MS	By MS/MS	By MS/MS
EVQLLESGGGLVQPGGSQR	gi|247424395	1909.99	955.993	2	105.06	19	0	Unmodified	0	0	0	0	0	427080	0	0	0	0	0	0	749370	1499700	0	0	0	0	0	967310	0	0	0	0	0	0	0	0	By matching	By matching	By matching	By matching	By matching	By matching	By matching	By matching	By matching	By matching	By matching	By matching	By matching
EVQLLESGGGLVQPGGSR	gi|519674470	1781.93	891.964	2	136.68	18	0	Unmodified	965080	0	0	0	0	609010	0	0	0	0	869160	0	0	0	0	0	394260	0	0	835360	300870	0	0	0	176950	462860	201930	386090	By MS/MS	By matching	By matching	By matching	By matching	By MS/MS	By matching	By matching	By matching	By matching	By matching	By matching	By matching
EVQLLESGGGLVQPGK	gi|371445544	1609.87	805.934	2	87.669	16	0	Unmodified	0	276900	0	0	186330	129120	565530	0	0	102780	0	223420	281960	0	0	0	0	227300	0	0	392420	532950	327500	0	0	0	0	0	By matching	By matching	By matching	By matching	By matching	By matching	By MS/MS	By matching	By matching	By matching	By matching	By matching	By matching
EVQLLESGGGLVQPGR	gi|320042460	1637.87	819.937	2	87.647	16	0	Unmodified	0	0	0	0	539160	392630	0	0	0	0	0	0	0	681230	722730	0	735380	717090	0	0	259540	0	0	570660	545500	229780	0	0	By matching	By matching	By matching	By matching	By matching	By matching	By matching	By matching	By matching	By matching	By matching	By matching	By matching
EVQLLESGGGLVRPGGSLR	gi|12734016	1923.05	962.527	2	219.52	19	1	Unmodified	0	993200	808490	1541100	2947400	405710	0	0	1291200	1284400	1965200	2477700	444010	1450500	0	0	663870	412470	6545000	181560	1123700	0	1367200	0	624710	418070	351350	281760	By matching	By matching	By matching	By MS/MS	By MS/MS	By matching	By matching	By matching	By matching	By matching	By matching	By MS/MS	By MS/MS
EVQLLESGGGSVQPGGSLR	gi|371447551	1868.96	935.48	2	195.25	19	0	Unmodified	0	0	0	0	736520	0	0	0	1466200	0	518520	0	836180	420950	482940	0	0	0	1156600	0	0	7456500	764300	373390	0	208770	2024000	0	By matching	By matching	By matching	By matching	By MS/MS	By matching	By matching	By matching	By MS/MS	By matching	By matching	By matching	By MS/MS
EVQLLESGGGVVQPGGSLR	gi|3859976	1881	941.498	2	89.557	19	0	Unmodified	0	415160	1934400	0	0	0	0	0	0	244490	0	4020000	188190	389140	0	581630	252320	0	0	362390	362770	0	0	0	0	0	0	0	By matching	By matching	By MS/MS	By matching	By matching	By matching	By matching	By matching	By matching	By matching	By matching	By MS/MS	By matching
EVQLLESGGGVVQPGTSLR	gi|63022663	1925.02	963.511	2	76.301	19	0	Unmodified	0	0	1839100	0	0	0	0	0	0	0	0	0	0	0	0	0	0	0	0	0	0	0	0	0	0	0	0	0	By matching	By matching	By MS/MS	By matching	By matching	By matching	By matching	By matching	By matching	By matching	By matching	By matching	By matching
EVQLLESGGGWVQPGGSLR	gi|371445584	1968.01	985.003	2	147.17	19	0	Unmodified	0	0	0	419000	0	0	0	0	0	0	0	0	911670	0	0	0	0	0	0	803030	0	0	0	0	0	0	1984600	0	By matching	By matching	By matching	By matching	By matching	By matching	By matching	By matching	By matching	By matching	By matching	By matching	By MS/MS
EVQLLESGGNLVQPGGSLR	gi|371446136	1952.03	977.016	2	250.27	19	0	Unmodified	0	1404800	763180	447480	3644100	1247700	2082900	742140	1490500	0	1990100	2037900	5611300	813710	1956700	0	2193600	1912700	2990400	0	3026200	2390300	1594200	1275400	0	3290000	2025100	2436700	By matching	By MS/MS	By MS/MS	By matching	By MS/MS	By MS/MS	By MS/MS	By MS/MS	By MS/MS	By matching	By MS/MS	By MS/MS	By MS/MS
EVQLLESGGR	gi|519673986	1086.57	544.283	2	202.31	10	0	Unmodified	0	315070	569560	155110	411530	366470	343610	0	0	184560	164140	414710	524130	335520	343960	0	402960	466030	265820	0	201190	500700	580440	0	253390	320270	1332200	382290	By matching	By MS/MS	By MS/MS	By matching	By MS/MS	By matching	By matching	By matching	By matching	By matching	By matching	By MS/MS	By MS/MS
EVQLLESGGTLVQPGGSLR	gi|371447531	1939.04	970.519	2	126.29	19	0	Unmodified	0	0	0	0	760490	0	0	0	0	0	0	0	605440	0	0	0	0	0	0	0	0	0	774190	0	0	0	2637900	0	By matching	By matching	By matching	By matching	By matching	By matching	By matching	By matching	By matching	By matching	By matching	By matching	By matching
EVQLLGSGGGLVQPGGSLR	gi|612406403	1822.99	912.495	2	176.48	19	0	Unmodified	0	0	0	0	0	0	0	0	0	0	0	0	2232300	0	457830	0	0	0	277160	0	0	0	0	0	0	2043100	950930	0	By matching	By matching	By matching	By matching	By matching	By matching	By matching	By matching	By matching	By matching	By matching	By matching	By MS/MS
EVQLLQSGAEVK	gi|5305655	1299.7	650.852	2	214.42	12	0	Unmodified	792640	461020	1703500	631710	868170	438400	473730	327550	0	565060	330860	1036800	255180	999430	182280	697590	273940	472260	276680	604390	275390	265700	322420	372320	810060	500220	148950	0	By MS/MS	By matching	By MS/MS	By matching	By MS/MS	By matching	By matching	By matching	By matching	By matching	By matching	By MS/MS	By matching
EVQLLQSGGGLIQPGGSLR	gi|1617102	1908.04	955.021	2	176.11	19	0	Unmodified	0	0	0	2413700	0	0	0	0	0	0	0	0	0	0	0	0	0	0	0	0	0	0	0	0	0	0	0	0	By matching	By matching	By matching	By MS/MS	By matching	By matching	By matching	By matching	By matching	By matching	By matching	By matching	By matching
EVQLLQSGGGLVQPGGSLR	gi|1871491	1894.03	948.014	2	150.65	19	0	Unmodified	0	0	0	0	0	0	0	621320	2399100	694290	2283600	0	0	0	0	0	0	0	0	0	830270	0	0	729670	0	0	0	0	By matching	By matching	By matching	By matching	By matching	By matching	By matching	By matching	By MS/MS	By matching	By MS/MS	By matching	By matching
EVQLQESGAEVK	gi|4139204	1315.66	658.831	2	125.82	12	0	Unmodified	0	0	0	0	0	0	600990	1023700	2140300	0	1228100	0	0	0	0	0	0	715390	0	0	543910	0	419060	0	0	0	0	1113900	By matching	By matching	By matching	By matching	By matching	By matching	By MS/MS	By MS/MS	By MS/MS	By matching	By MS/MS	By matching	By matching
EVQLQESGGGLVQPGGSLR	gi|440919796	1909.99	955.993	2	99.392	19	0	Unmodified	0	0	0	3547200	0	0	0	0	0	0	0	0	0	0	0	0	0	0	0	0	0	0	0	0	0	0	0	0	By matching	By matching	By matching	By MS/MS	By matching	By matching	By matching	By matching	By matching	By matching	By matching	By matching	By matching
EVQLQESGPGLVK	gi|532137803	1382.74	692.37	2	172.85	13	0	Unmodified	0	0	0	0	0	0	0	0	0	0	0	197080	0	0	0	0	0	0	732700	0	0	0	0	0	0	0	0	0	By matching	By matching	By matching	By matching	By matching	By matching	By matching	By matching	By matching	By matching	By matching	By matching	By matching
EVQLSESGGGFVKPGGSLR	gi|827343200	1902.98	952.49	2	145.99	19	1	Unmodified	6499300	11014000	5747500	4759500	7233300	5989200	6498200	8174900	8736500	9563900	7997800	5922400	10513000	11012000	6464700	10486000	8518500	6104400	7126000	12840000	10175000	5328200	3791400	7567000	5904600	7308000	5317800	6126200	By MS/MS	By MS/MS	By MS/MS	By MS/MS	By MS/MS	By MS/MS	By matching	By matching	By MS/MS	By MS/MS	By MS/MS	By MS/MS	By MS/MS
EVQLSESGGGLVQPGGSLR	gi|33319310	1868.96	935.48	2	213.01	19	0	Unmodified	112500	595190	0	0	0	0	0	0	1466200	0	0	615080	0	0	0	0	495080	310450	0	0	0	7456500	764300	0	0	0	0	0	By matching	By matching	By matching	By matching	By matching	By matching	By matching	By matching	By MS/MS	By matching	By matching	By MS/MS	By matching
EVQLVASGGALVQPGGSLR	gi|247426094	1837.01	919.503	2	108.71	19	0	Unmodified	0	0	0	0	0	0	0	0	0	0	0	0	0	0	0	0	0	0	0	0	0	0	0	0	0	1957900	0	0	By matching	By matching	By matching	By matching	By matching	By matching	By matching	By matching	By matching	By matching	By matching	By matching	By matching
EVQLVASGGDFVQPGGSLR	gi|519673716	1914.98	958.49	2	82.774	19	0	Unmodified	0	0	0	0	0	0	0	0	0	0	0	0	0	0	0	0	0	0	921280	0	0	0	0	0	0	0	0	0	By matching	By matching	By matching	By matching	By matching	By matching	By matching	By matching	By matching	By matching	By matching	By matching	By matching
EVQLVASGGGLVQPGGSLR	gi|33319512	1822.99	912.495	2	63.706	19	0	Unmodified	806750	0	0	0	0	0	0	0	0	0	0	0	0	0	0	0	0	0	0	0	0	0	0	0	0	0	0	0	By MS/MS	By matching	By matching	By matching	By matching	By matching	By matching	By matching	By matching	By matching	By matching	By matching	By matching
EVQLVDSGGDLVQPGGSLR	gi|114147367	1924.99	963.493	2	122.13	19	0	Unmodified	0	0	0	0	2465400	0	0	0	0	0	0	0	0	0	0	0	432190	0	0	855610	4840500	0	0	741620	0	0	0	0	By matching	By matching	By matching	By matching	By MS/MS	By matching	By matching	By matching	By matching	By matching	By matching	By matching	By matching
EVQLVDSGGDLVQPGR	gi|662565138	1667.85	834.924	2	135.55	16	0	Unmodified	0	0	0	0	0	0	0	0	0	0	0	103090	1710800	0	0	0	0	0	0	573950	0	0	0	0	0	0	0	265300	By matching	By matching	By matching	By matching	By matching	By matching	By matching	By matching	By matching	By matching	By matching	By matching	By MS/MS
EVQLVDSGGGLVKPGGSLR	gi|247424834	1867.02	934.508	2	100.58	19	1	Unmodified	302260	472050	159190	0	207720	461180	0	0	322920	0	293280	183630	0	0	0	0	197560	106490	0	0	514020	0	0	0	0	0	299610	0	By matching	By MS/MS	By matching	By matching	By matching	By matching	By matching	By matching	By matching	By matching	By matching	By matching	By matching
EVQLVDSGGGLVQPGGSLR	gi|371447215	1866.98	934.49	2	214.52	19	0	Unmodified	2390100	1825300	864930	3311700	0	5847600	1082500	0	8001400	0	0	2494900	4087600	2592300	2266400	3111200	1579500	2101000	2587700	0	2385500	3104100	446050	4929700	3627300	1531600	2660500	0	By MS/MS	By MS/MS	By matching	By MS/MS	By matching	By MS/MS	By MS/MS	By matching	By MS/MS	By matching	By matching	By MS/MS	By MS/MS
EVQLVDSGGGLVQPGR	gi|371448412	1609.84	805.921	2	115.38	16	0	Unmodified	0	0	0	0	514110	0	0	0	0	0	0	0	0	0	0	0	0	0	0	0	382080	0	0	0	0	0	251330	130740	By matching	By matching	By matching	By matching	By MS/MS	By matching	By matching	By matching	By matching	By matching	By matching	By matching	By matching
EVQLVDSGGGLVRPGGSLR	gi|630868432	1895.02	948.511	2	91.926	19	1	Unmodified	0	0	0	0	0	0	0	0	0	0	0	0	0	0	0	0	3706500	0	0	0	0	0	0	0	0	879540	411290	0	By matching	By matching	By matching	By matching	By matching	By matching	By matching	By matching	By matching	By matching	By matching	By matching	By matching
EVQLVEAGGGLVQPGGSLR	gi|3004748	1865	933.5	2	86.213	19	0	Unmodified	0	80294	115330	0	0	181910	187690	82757	0	0	0	0	151530	1096200	0	0	0	158580	0	132300	95154	0	155880	270890	0	0	0	417410	By matching	By matching	By matching	By matching	By matching	By matching	By matching	By matching	By matching	By matching	By matching	By matching	By matching
EVQLVESAGGLVQPGGSLR	gi|9968324	1895.01	948.506	2	185.23	19	0	Unmodified	248810	0	0	2408500	691050	694460	1527100	17604000	53593000	0	96136	2948900	0	0	53620000	14809000	0	0	0	0	0	0	0	0	0	89848000	3160800	0	By matching	By matching	By matching	By matching	By matching	By matching	By MS/MS	By MS/MS	By MS/MS	By matching	By matching	By MS/MS	By matching
EVQLVESGAEVK	gi|924443624	1286.67	644.336	2	157.2	12	0	Unmodified	416600	0	64156	0	0	451210	126660	0	0	0	192950	165250	0	345020	0	0	200070	0	0	158020	0	0	0	0	0	0	0	0	By MS/MS	By matching	By matching	By matching	By MS/MS	By MS/MS	By matching	By matching	By matching	By matching	By matching	By matching	By matching
EVQLVESGAEVKKPGQSLK	gi|21670555	2025.11	676.037	3	98.508	19	2	Unmodified	0	0	0	0	0	0	0	0	3527100	0	0	0	0	0	0	0	0	0	0	0	0	0	0	0	0	0	0	0	By matching	By matching	By matching	By matching	By matching	By matching	By matching	By matching	By MS/MS	By matching	By matching	By matching	By matching
EVQLVESGGALIQPGGSLR	gi|371445929	1909.03	955.513	2	88.282	19	0	Unmodified	0	417610	238980	1556100	0	430180	0	0	0	0	2181700	497970	371350	0	314490	0	526850	355640	0	0	0	335040	359090	1323400	875230	373930	1065700	280700	By matching	By matching	By matching	By matching	By matching	By matching	By matching	By matching	By matching	By matching	By MS/MS	By matching	By matching
EVQLVESGGALVEPGGSLR	gi|320042464	1896	948.998	2	109.13	19	0	Unmodified	998370	0	0	882480	0	0	0	0	0	0	1580400	0	0	0	0	0	0	1485200	0	0	1093500	0	899900	0	0	0	0	0	By matching	By matching	By matching	By matching	By matching	By matching	By matching	By matching	By matching	By matching	By matching	By matching	By matching
EVQLVESGGALVQPGESLR	gi|519672480	1967.03	984.516	2	109.13	19	0	Unmodified	0	719500	0	0	634290	0	0	0	0	0	0	0	611060	0	0	0	0	0	0	0	0	0	681310	0	0	0	0	0	By matching	By matching	By matching	By matching	By matching	By matching	By matching	By matching	By matching	By matching	By matching	By matching	By matching
EVQLVESGGALVQPGGSLR	gi|519673630	1895.01	948.506	2	75.319	19	0	Unmodified	0	0	0	0	0	1286600	0	0	0	0	0	0	1626600	0	0	0	0	0	0	0	0	0	0	0	0	0	741340	0	By matching	By matching	By matching	By matching	By matching	By MS/MS	By matching	By matching	By matching	By matching	By matching	By matching	By MS/MS
EVQLVESGGALVQPGR	gi|47846491	1637.87	819.937	2	90.348	16	0	Unmodified	452330	0	0	0	510430	0	0	0	361950	366330	277240	418630	1118800	862680	404910	271480	323500	0	0	134420	429000	690170	0	430540	389390	396610	0	147120	By matching	By matching	By matching	By matching	By matching	By matching	By matching	By matching	By matching	By matching	By matching	By matching	By MS/MS
EVQLVESGGAVIQPGGSLR	gi|21670059	1895.01	948.506	2	218.42	19	0	Unmodified	0	0	10702000	13571000	0	10058000	6276800	18374000	15038000	11276000	14114000	359950	0	4899900	792300	14809000	10679000	8025600	0	4146600	0	14711000	3116600	8922400	0	73802000	3375000	5029000	By matching	By matching	By MS/MS	By MS/MS	By matching	By MS/MS	By MS/MS	By MS/MS	By MS/MS	By MS/MS	By MS/MS	By matching	By matching
EVQLVESGGAVVQPGGSLK	gi|74146991	1852.99	927.495	2	186.89	19	0	Unmodified	1074300	2546900	0	0	0	0	2759200	0	0	2145500	3454400	0	0	2769200	0	0	0	0	0	0	3471000	1098600	765830	1904500	0	0	0	0	By MS/MS	By MS/MS	By matching	By matching	By matching	By matching	By MS/MS	By matching	By matching	By MS/MS	By MS/MS	By matching	By matching
EVQLVESGGAVVQPGGSLR	gi|371446284	1881	941.498	2	189.34	19	0	Unmodified	449030	0	451600	0	639930	529040	0	1133200	0	0	0	0	0	2587900	0	409450	88912000	0	0	145150000	0	409650	0	86295000	170460	79465000	248340	0	By MS/MS	By matching	By matching	By matching	By MS/MS	By matching	By matching	By MS/MS	By matching	By matching	By matching	By matching	By matching
EVQLVESGGAVVR	gi|33319112	1341.73	671.863	2	158.52	13	0	Unmodified	739420	0	0	737940	0	0	0	0	0	0	0	0	0	1095600	0	0	782960	0	264020	721050	0	0	0	416250	0	0	0	252870	By MS/MS	By matching	By matching	By MS/MS	By matching	By matching	By matching	By matching	By matching	By matching	By matching	By matching	By matching
EVQLVESGGAVVRPGGSLR	gi|33319112	1909.04	955.519	2	189.56	19	1	Unmodified	3096900	2422800	579270	0	3584300	1502500	1964100	581750	7395600	4032500	3070400	2974400	1439700	3832300	0	2964200	2808000	2681400	0	2704800	4274900	0	1693500	2276200	1299200	0	462950	1398800	By MS/MS	By MS/MS	By matching	By matching	By MS/MS	By matching	By MS/MS	By matching	By MS/MS	By MS/MS	By MS/MS	By MS/MS	By matching
EVQLVESGGDLLQPGGSLR	gi|33319124	1953.02	977.508	2	223.82	19	0	Unmodified	1216900	4130400	0	595870	0	0	0	0	0	0	0	0	0	658270	0	0	0	0	0	0	0	9674200	926910	0	0	0	0	0	By MS/MS	By MS/MS	By matching	By matching	By matching	By matching	By matching	By MS/MS	By matching	By matching	By matching	By matching	By MS/MS
EVQLVESGGDLVHPGGSLR	gi|247424401	1948	975.001	2	110.64	19	0	Unmodified	872420	0	0	0	0	0	0	0	1147300	0	0	235020	0	111940	179350	0	384930	893610	0	110360	0	0	0	129350	0	0	61410	0	By MS/MS	By matching	By matching	By matching	By matching	By matching	By matching	By matching	By matching	By matching	By matching	By matching	By matching
EVQLVESGGDLVKPGESLR	gi|519674524	2011.06	1006.53	2	135.29	19	1	Unmodified	0	273450	0	0	129700	0	0	93085	0	0	150080	0	524060	0	0	0	251860	0	0	0	1331200	142850	0	0	0	0	0	0	By matching	By matching	By matching	By matching	By matching	By matching	By matching	By matching	By matching	By matching	By matching	By matching	By matching
EVQLVESGGDLVKPGGSLR	gi|371447749	1939.04	970.519	2	205	19	1	Unmodified	7767700	0	2552600	0	3977200	1047300	1970800	2358500	7893300	3566900	1623300	1250700	2983800	2014000	3687600	0	520250	1864200	2913800	477460	1221200	0	924490	1205900	938260	0	3958200	1269500	By MS/MS	By matching	By MS/MS	By matching	By MS/MS	By MS/MS	By MS/MS	By MS/MS	By MS/MS	By MS/MS	By MS/MS	By MS/MS	By MS/MS
EVQLVESGGDLVKPGR	gi|33319550	1681.9	841.95	2	176.19	16	1	Unmodified	0	0	0	0	0	0	0	0	0	0	110720	0	0	0	0	138140	0	480810	0	0	0	414980	0	0	153370	1036800	0	0	By matching	By matching	By matching	By matching	By matching	By matching	By matching	By matching	By matching	By matching	By matching	By matching	By matching
EVQLVESGGDLVQPGASLR	gi|33318900	1953.02	977.508	2	114.1	19	0	Unmodified	0	0	0	0	0	0	0	0	0	2137800	0	0	0	0	0	0	0	0	0	0	0	0	0	0	0	0	0	0	By matching	By matching	By matching	By matching	By matching	By matching	By matching	By matching	By matching	By MS/MS	By matching	By matching	By matching
EVQLVESGGDLVQPGESLR	gi|63102780	2011.02	1006.51	2	153.17	19	0	Unmodified	0	0	0	0	0	0	0	1257400	0	0	0	466170	0	0	0	632700	0	0	0	0	1186800	1113800	0	226840	0	0	0	0	By matching	By matching	By matching	By matching	By matching	By matching	By matching	By MS/MS	By matching	By matching	By matching	By matching	By matching
EVQLVESGGDLVQPGGSLK	gi|3859954	1910.99	956.497	2	163.15	19	0	Unmodified	0	0	0	0	0	0	4116100	0	0	0	0	1394700	0	0	0	0	0	0	0	0	0	0	0	0	0	0	0	0	By matching	By matching	By matching	By matching	By matching	By matching	By MS/MS	By matching	By matching	By matching	By matching	By MS/MS	By matching
EVQLVESGGDLVQPGGSLR	gi|247425900	1939	970.501	2	254.39	19	0	Unmodified	14460000	8433800	5348900	0	12124000	4842600	5692100	11542000	12344000	463160	6458200	6927500	6739600	12856000	6536500	14625000	6611300	5942700	8900800	18157000	14211000	9717600	3923100	9030700	685540	8515200	5566100	10798000	By MS/MS	By MS/MS	By MS/MS	By matching	By MS/MS	By MS/MS	By MS/MS	By MS/MS	By MS/MS	By matching	By MS/MS	By MS/MS	By MS/MS
EVQLVESGGDLVQPGR	gi|371446837	1681.86	841.932	2	169.15	16	0	Unmodified	0	725220	0	262320	1962400	516870	1295200	0	863900	664400	0	1145000	1083900	2153400	1831500	1979900	490230	0	1030400	0	1632100	3226600	0	3844300	1029900	1967600	0	809660	By matching	By MS/MS	By matching	By matching	By MS/MS	By matching	By MS/MS	By matching	By MS/MS	By matching	By matching	By MS/MS	By MS/MS
EVQLVESGGDLVRPGGSLR	gi|371448464	1967.04	984.522	2	109.5	19	1	Unmodified	0	135420	0	0	300380	0	136750	79781	1237400	359870	250520	0	504540	266100	258720	162650	0	189370	610550	266730	363450	0	212690	454840	142550	0	0	227570	By matching	By matching	By matching	By matching	By matching	By matching	By matching	By matching	By MS/MS	By matching	By matching	By matching	By matching
EVQLVESGGDVVRPGGSLR	gi|519673888	1953.03	977.514	2	100.46	19	1	Unmodified	0	0	0	0	1994200	0	0	0	0	0	0	0	0	0	0	0	0	0	0	0	0	0	0	0	0	0	0	0	By matching	By matching	By matching	By matching	By MS/MS	By matching	By matching	By matching	By matching	By matching	By matching	By matching	By matching
EVQLVESGGELVQPGGSLR	gi|33319248	1953.02	977.508	2	90.872	19	0	Unmodified	0	0	0	0	0	0	0	0	0	2674500	0	0	0	0	0	0	0	0	0	0	0	0	0	0	0	0	0	0	By matching	By matching	By matching	By matching	By matching	By matching	By matching	By matching	By matching	By MS/MS	By matching	By matching	By matching
EVQLVESGGGFVQPGGSLR	gi|219566877	1914.98	958.49	2	197.41	19	0	Unmodified	1267400	1546700	1252800	1249100	2007800	249370	0	0	2656000	1047200	1545700	0	3601000	1776100	2158100	1217800	1570000	750670	1471800	1063900	0	1192300	0	1438100	549560	2813700	0	0	By MS/MS	By MS/MS	By MS/MS	By matching	By MS/MS	By matching	By matching	By matching	By MS/MS	By MS/MS	By matching	By matching	By MS/MS
EVQLVESGGGFVQPGR	gi|695943051	1657.84	829.921	2	140.77	16	0	Unmodified	0	190590	0	0	0	0	0	0	0	0	0	288470	0	0	0	0	0	0	0	0	0	1029300	0	0	0	0	0	0	By matching	By matching	By matching	By matching	By matching	By matching	By matching	By matching	By matching	By matching	By matching	By matching	By matching
EVQLVESGGGLAKPGGSLR	gi|225698081	1853	927.5	2	94.234	19	1	Unmodified	0	0	0	0	1294200	0	0	0	0	0	0	0	0	0	0	0	0	0	0	0	0	0	0	0	0	0	0	0	By matching	By matching	By matching	By matching	By MS/MS	By matching	By matching	By matching	By matching	By matching	By matching	By matching	By matching
EVQLVESGGGLAQPGGSLR	gi|519672394	1852.96	927.482	2	168.81	19	0	Unmodified	6918700	4162900	2810500	3931100	5232400	2305000	3990300	4271700	5657600	580110	955750	194200	4725200	0	0	7389700	1966900	3079000	0	8291400	5627000	2571800	0	3994400	468480	3755000	2572300	226400	By MS/MS	By MS/MS	By MS/MS	By MS/MS	By MS/MS	By MS/MS	By MS/MS	By MS/MS	By MS/MS	By matching	By matching	By matching	By MS/MS
EVQLVESGGGLAQPGR	gi|371446240	1595.83	798.913	2	125.41	16	0	Unmodified	381140	517870	456680	1085700	798260	630610	0	0	0	699660	0	1814800	0	0	983900	0	0	0	467920	442090	1033200	667260	283080	892600	491060	494390	556130	0	By matching	By MS/MS	By MS/MS	By matching	By MS/MS	By MS/MS	By matching	By matching	By matching	By MS/MS	By matching	By MS/MS	By matching
EVQLVESGGGLAQPR	gi|371447203	1538.81	770.403	2	133.25	15	0	Unmodified	0	0	0	0	0	0	0	0	0	0	0	73942	102530	175420	581950	0	187950	0	0	0	0	0	0	254100	0	0	119270	0	By matching	By matching	By matching	By matching	By matching	By matching	By matching	By matching	By matching	By matching	By matching	By matching	By matching
EVQLVESGGGLDQPGGSLR	gi|5051238	1896.95	949.477	2	145.88	19	0	Unmodified	345760	439770	117180	0	0	0	649610	0	0	0	0	0	0	0	0	286360	2658900	0	0	0	126450	124070	0	203950	0	0	192090	0	By matching	By matching	By matching	By matching	By matching	By matching	By MS/MS	By matching	By matching	By matching	By matching	By matching	By matching
EVQLVESGGGLEQPGGSLR	gi|519673668	1910.97	956.485	2	221.86	19	0	Unmodified	6146500	3527700	0	0	7583200	0	5386200	4305900	0	5115700	0	0	1797300	6049100	3381200	5525600	4642300	6575200	0	3388000	9153700	1137900	164250	5186200	149330	0	523070	4497100	By MS/MS	By MS/MS	By matching	By matching	By MS/MS	By matching	By MS/MS	By MS/MS	By matching	By MS/MS	By matching	By matching	By MS/MS
EVQLVESGGGLEQPGR	gi|80975591	1653.83	827.916	2	197.1	16	0	Unmodified	0	378100	0	0	0	0	0	0	0	0	1495200	0	0	0	0	1145700	0	0	3088100	1441800	0	0	0	0	498680	0	0	0	By matching	By MS/MS	By matching	By matching	By matching	By matching	By matching	By matching	By matching	By matching	By MS/MS	By matching	By matching
EVQLVESGGGLERPGGSLR	gi|49354743	1939.01	970.506	2	165.49	19	1	Unmodified	0	0	0	4393700	0	0	0	0	0	9449200	0	0	0	0	0	0	0	0	0	0	0	0	0	0	13759000	0	0	0	By matching	By matching	By matching	By MS/MS	By matching	By matching	By matching	By matching	By matching	By MS/MS	By matching	By matching	By matching
EVQLVESGGGLGQPGGSLR	gi|371447017	1838.95	920.474	2	131.13	19	0	Unmodified	1137200	2643200	144760	0	0	0	161420	246670	309890	474830	1020500	0	344180	243140	0	0	705640	0	157020	0	0	441160	514340	280270	0	2270000	0	301630	By MS/MS	By MS/MS	By matching	By matching	By matching	By matching	By matching	By matching	By matching	By matching	By MS/MS	By matching	By matching
EVQLVESGGGLIHPGGSLR	gi|695943081	1904.01	953.006	2	155.26	19	0	Unmodified	0	0	0	663800	2121200	0	0	0	0	0	0	0	318930	0	0	0	0	0	0	0	0	0	0	379000	0	0	0	0	By matching	By matching	By matching	By MS/MS	By MS/MS	By matching	By matching	By matching	By matching	By matching	By matching	By matching	By matching
EVQLVESGGGLIQPGGSLK	gi|31337524	1867.01	934.503	2	74.732	19	0	Unmodified	0	0	0	0	0	0	1030500	0	0	0	1170200	1189100	880940	0	1373600	2282900	794790	0	0	237330	465890	0	451320	0	0	0	0	0	By matching	By matching	By matching	By matching	By matching	By matching	By matching	By matching	By matching	By matching	By MS/MS	By MS/MS	By MS/MS
EVQLVESGGGLIRPGGSLR	gi|358439860	1923.05	962.527	2	100.27	19	1	Unmodified	0	321510	171050	0	0	0	0	368110	0	0	0	0	0	0	0	0	0	0	0	0	0	0	0	0	418540	3252300	0	0	By matching	By matching	By matching	By matching	By matching	By matching	By matching	By matching	By matching	By matching	By matching	By matching	By matching
EVQLVESGGGLLK	gi|371446270	1327.73	664.867	2	80.312	13	0	Unmodified	453460	314710	0	0	0	0	0	106640	0	0	0	0	0	0	0	0	0	0	0	0	121770	0	0	0	0	0	0	0	By MS/MS	By matching	By matching	By matching	By matching	By matching	By matching	By matching	By matching	By matching	By matching	By matching	By matching
EVQLVESGGGLLQPGGSLR	gi|33319652	1895.01	948.506	2	271.58	19	0	Unmodified	9370200	20511000	13240000	15579000	48270000	10892000	0	0	13704000	12221000	0	0	25549000	315730	12737000	15919000	11444000	8025600	13972000	0	15423000	14711000	3439000	9507300	6386800	78538000	3160800	0	By MS/MS	By MS/MS	By MS/MS	By MS/MS	By MS/MS	By MS/MS	By matching	By matching	By MS/MS	By MS/MS	By matching	By matching	By MS/MS
EVQLVESGGGLLQPGR	gi|2665870	1637.87	819.937	2	108.96	16	0	Unmodified	260860	234370	162530	147880	653880	0	0	244960	0	239460	0	308610	477580	658340	651230	0	0	246730	845530	221790	0	336190	0	608480	0	560750	469120	0	By matching	By MS/MS	By matching	By matching	By MS/MS	By matching	By matching	By MS/MS	By matching	By MS/MS	By matching	By matching	By MS/MS
EVQLVESGGGLPQPGGSLR	gi|247424796	1878.98	940.49	2	81.639	19	0	Unmodified	0	229260	0	0	0	0	0	0	0	0	0	0	0	0	0	0	0	0	0	0	0	165060	0	3376100	0	0	582070	0	By matching	By matching	By matching	By matching	By matching	By matching	By matching	By matching	By matching	By matching	By matching	By matching	By matching
EVQLVESGGGLSQPGGSLR	gi|2145160	1868.96	935.48	2	138.97	19	0	Acetyl (Protein N-term)	0	0	0	0	0	0	0	0	0	0	0	0	0	0	0	0	0	0	0	0	0	0	0	0	0	6799200	0	0	By matching	By matching	By matching	By matching	By matching	By matching	By matching	By matching	By matching	By matching	By matching	By matching	By matching
EVQLVESGGGLTQPGGSLR	gi|519674078	1882.97	942.487	2	156.61	19	0	Acetyl (Protein N-term)	496710	0	0	0	2900100	0	0	0	792840	595430	0	0	448660	0	0	0	0	0	0	0	0	451770	0	376470	0	911840	0	0	By matching	By matching	By matching	By matching	By MS/MS	By matching	By matching	By matching	By matching	By matching	By matching	By matching	By matching
EVQLVESGGGLVEPGGSLR	gi|519672592	1881.98	941.99	2	84.436	19	0	Unmodified	0	0	0	0	0	0	0	0	0	0	0	0	0	0	0	0	0	0	0	0	679960	0	0	0	0	0	0	0	By matching	By matching	By matching	By matching	By matching	By matching	By matching	By matching	By matching	By matching	By matching	By matching	By matching
EVQLVESGGGLVEPGR	gi|33319012	1624.84	813.421	2	119.51	16	0	Unmodified	0	1063200	0	0	0	0	416500	0	0	0	0	0	0	0	0	0	0	0	0	0	0	0	0	807700	0	0	0	0	By matching	By MS/MS	By matching	By matching	By matching	By matching	By matching	By matching	By matching	By matching	By matching	By matching	By matching
EVQLVESGGGLVHPGGSLR	gi|519672332	1890	945.998	2	118.23	19	0	Unmodified	1544900	844240	0	8845700	1331100	0	0	0	2813500	0	0	0	0	3147800	0	1220900	1224100	0	0	0	0	0	0	0	0	0	0	0	By matching	By matching	By matching	By MS/MS	By matching	By matching	By matching	By matching	By matching	By matching	By matching	By matching	By matching
EVQLVESGGGLVK	gi|538261346	1313.72	657.86	2	239.38	13	0	Unmodified	2622300	2548400	3213800	2400200	3605300	2090200	1759300	2458000	0	0	0	0	407970	547790	646700	1905500	2839400	0	1591300	0	198790	139080	1156000	169520	0	1957000	139100	294290	By MS/MS	By matching	By MS/MS	By MS/MS	By MS/MS	By MS/MS	By MS/MS	By MS/MS	By matching	By matching	By matching	By matching	By MS/MS
EVQLVESGGGLVKPEGSLR	gi|315487900	1953.05	977.527	2	200.73	19	1	Unmodified	0	0	0	0	2640500	0	1189500	0	0	0	2991700	0	0	0	0	1317900	0	0	0	0	0	835900	901710	0	0	0	0	0	By matching	By matching	By matching	By matching	By MS/MS	By matching	By MS/MS	By matching	By matching	By matching	By MS/MS	By matching	By matching
EVQLVESGGGLVKPGASLR	gi|695943075	1895.05	948.524	2	118.66	19	1	Unmodified	2453400	0	0	0	0	0	0	0	0	0	0	0	0	0	0	0	0	0	0	0	0	0	0	0	0	0	0	0	By MS/MS	By matching	By matching	By matching	By matching	By matching	By matching	By matching	By matching	By matching	By matching	By matching	By matching
EVQLVESGGGLVKPGESLR	gi|662565223	1953.05	977.527	2	261.06	19	1	Unmodified	2539600	599410	3384200	516580	3544100	1253600	1712700	3376900	3987900	2332900	4069600	3972000	9479400	3892600	2412500	1787500	2738000	2116300	1607900	1232600	3521300	1227600	1136900	3814600	3618500	5232700	2739200	2967200	By MS/MS	By MS/MS	By MS/MS	By matching	By MS/MS	By MS/MS	By MS/MS	By MS/MS	By MS/MS	By MS/MS	By MS/MS	By MS/MS	By MS/MS
EVQLVESGGGLVKPGGSLR	gi|538261346	1881.03	941.516	2	280.01	19	1	Unmodified	13924000	12633000	0	0	0	0	34037000	0	0	0	13095000	0	0	0	10262000	0	0	0	0	0	0	0	0	0	0	0	0	0	By MS/MS	By MS/MS	By matching	By matching	By matching	By matching	By MS/MS	By matching	By matching	By matching	By MS/MS	By matching	By matching
EVQLVESGGGLVKPGGSQR	gi|247426030	1896.01	949.003	2	72.207	19	1	Unmodified	0	0	0	0	0	500030	0	0	0	0	0	0	0	0	0	0	0	0	0	0	0	0	0	0	0	0	0	0	By matching	By matching	By matching	By matching	By matching	By MS/MS	By matching	By matching	By matching	By matching	By matching	By matching	By matching
EVQLVESGGGLVKPGGSR	gi|47846651	1767.95	884.974	2	123.59	18	1	Unmodified	182350	0	119070	0	0	119480	0	0	0	41546	115220	0	544340	0	0	0	0	0	79611	0	0	0	0	0	92149	519400	0	0	By matching	By matching	By matching	By matching	By matching	By matching	By matching	By matching	By matching	By matching	By matching	By matching	By MS/MS
EVQLVESGGGLVKPGR	gi|371448288	1623.89	812.947	2	115.58	16	1	Unmodified	0	0	0	0	0	0	0	0	0	0	0	0	0	0	0	0	0	0	0	0	0	0	0	0	0	2688000	0	0	By matching	By matching	By matching	By matching	By matching	By matching	By matching	By matching	By matching	By matching	By matching	By matching	By matching
EVQLVESGGGLVNPGGSLR	gi|62871238	1866.98	934.49	2	137.89	19	0	Unmodified	0	0	0	0	173660	0	127110	0	512480	0	0	0	0	0	0	0	577760	240150	285690	459390	193100	0	0	0	3109000	0	7232700	133840	By matching	By matching	By matching	By matching	By matching	By matching	By matching	By matching	By matching	By matching	By matching	By matching	By matching
EVQLVESGGGLVQAGGSLR	gi|696826272	1854.98	928.49	2	68.261	19	0	Unmodified	0	0	0	0	0	0	0	0	0	0	0	0	0	0	0	0	0	0	0	0	0	0	0	0	0	0	0	1159600	By matching	By matching	By matching	By matching	By matching	By matching	By matching	By matching	By matching	By matching	By matching	By matching	By matching
EVQLVESGGGLVQPAGSLR	gi|662564972	1895.01	948.506	2	74.657	19	0	Unmodified	0	0	0	0	0	0	0	0	0	0	0	1652900	0	2218600	0	0	0	0	0	0	970260	0	0	0	0	0	0	0	By matching	By matching	By matching	By matching	By matching	By matching	By matching	By matching	By matching	By matching	By matching	By MS/MS	By matching
EVQLVESGGGLVQPEGSLR	gi|31337518	1953.02	977.508	2	228.85	19	0	Unmodified	0	0	718510	492460	3171800	0	0	0	3117700	0	1344600	1476100	1956000	0	1126400	0	0	2062900	0	0	0	3446600	882150	2640000	0	0	1031600	1403900	By matching	By matching	By MS/MS	By matching	By MS/MS	By matching	By matching	By matching	By MS/MS	By matching	By MS/MS	By matching	By MS/MS
EVQLVESGGGLVQPGASLR	gi|519674010	1895.01	948.506	2	202.94	19	0	Unmodified	0	0	2181100	0	2346200	0	1265100	0	3840700	0	1527400	0	0	0	0	0	0	0	0	704210	0	0	0	0	0	0	0	0	By matching	By matching	By MS/MS	By matching	By MS/MS	By matching	By MS/MS	By matching	By MS/MS	By matching	By matching	By matching	By matching
EVQLVESGGGLVQPGESLR	gi|247425903	1953.02	977.508	2	205	19	0	Unmodified	0	0	0	0	3171800	0	0	0	0	2137800	0	0	0	0	0	1922000	0	0	3001500	0	5989100	0	0	0	1221300	0	0	0	By matching	By matching	By matching	By matching	By MS/MS	By matching	By matching	By matching	By matching	By MS/MS	By matching	By matching	By matching
EVQLVESGGGLVQPGGSLK	gi|751361554	1852.99	927.495	2	193.06	19	0	Unmodified	0	2546900	2709500	0	0	1908500	2759200	2415500	2742000	2145500	3454400	0	6473800	2769200	1619300	0	3403600	1816400	893410	2177500	3471000	1098600	0	0	1893400	3222100	1948800	0	By matching	By MS/MS	By MS/MS	By matching	By matching	By MS/MS	By MS/MS	By MS/MS	By MS/MS	By MS/MS	By MS/MS	By matching	By MS/MS
EVQLVESGGGLVQPGGSLR	gi|576865225	1881	941.498	2	329.54	19	0	Unmodified	91653000	141780000	66982000	56435000	97220000	76839000	79196000	94408000	123500000	113470000	102220000	79094000	150530000	158670000	65773000	0	98676000	71140000	76535000	145150000	122300000	64338000	40534000	93211000	71100000	5270400	69119000	72193000	By MS/MS	By MS/MS	By MS/MS	By MS/MS	By MS/MS	By MS/MS	By MS/MS	By MS/MS	By MS/MS	By MS/MS	By MS/MS	By MS/MS	By MS/MS
EVQLVESGGGLVQPGGSPR	gi|371446867	1864.96	933.482	2	158	19	0	Unmodified	0	0	0	0	2807900	0	0	0	0	0	0	0	0	0	0	0	0	199970	0	0	0	0	0	0	0	0	0	0	By matching	By matching	By matching	By matching	By MS/MS	By matching	By matching	By matching	By matching	By matching	By matching	By matching	By matching
EVQLVESGGGLVQPGGSQR	gi|371448330	1895.97	948.985	2	247.3	19	0	Unmodified	0	264160	0	0	425040	0	159070	0	0	0	0	0	0	0	0	0	1617000	0	0	0	0	0	0	0	161360	0	0	0	By matching	By matching	By matching	By matching	By matching	By matching	By matching	By matching	By matching	By matching	By matching	By matching	By matching
EVQLVESGGGLVQPGGSR	gi|519674723	1767.91	884.956	2	116.61	18	0	Unmodified	0	188440	292580	0	159210	248030	130450	119130	122490	267340	119180	0	181200	243270	231130	403600	359280	124820	563640	148820	797250	0	0	373840	0	193520	0	0	By matching	By matching	By matching	By matching	By matching	By matching	By matching	By matching	By matching	By matching	By matching	By matching	By matching
EVQLVESGGGLVQPGGSVR	gi|612406477	1866.98	934.49	2	154.56	19	0	Unmodified	0	0	0	2778200	0	0	0	541290	0	0	0	0	0	0	0	0	0	0	0	0	0	0	0	115260	0	0	0	0	By matching	By matching	By matching	By MS/MS	By matching	By matching	By matching	By MS/MS	By matching	By matching	By matching	By matching	By matching
EVQLVESGGGLVQPGGTLR	gi|33319260	1895.01	948.506	2	194.15	19	0	Unmodified	0	0	2181100	0	0	0	0	0	0	0	0	0	0	0	0	0	0	0	9709600	0	0	0	0	0	0	0	0	0	By matching	By matching	By MS/MS	By matching	By matching	By matching	By matching	By matching	By matching	By matching	By matching	By matching	By matching
EVQLVESGGGLVQPGK	gi|21668794	1595.85	798.926	2	110.57	16	0	Unmodified	388690	287540	97881	0	698780	0	429730	232860	0	469530	470440	0	546320	769050	609060	514490	0	0	549990	0	688130	799110	0	418120	373840	0	315900	0	By matching	By MS/MS	By matching	By matching	By MS/MS	By matching	By MS/MS	By MS/MS	By matching	By MS/MS	By MS/MS	By matching	By MS/MS
EVQLVESGGGLVQPGKSLR	gi|21668794	1952.07	977.035	2	162.42	19	1	Unmodified	0	718780	0	0	0	0	0	0	0	133930	126260	0	0	0	2171100	0	367420	0	0	0	452580	0	0	356680	167210	0	0	0	By matching	By MS/MS	By matching	By matching	By matching	By matching	By matching	By matching	By matching	By matching	By matching	By matching	By matching
EVQLVESGGGLVQPGR	gi|757819140	1623.86	812.929	2	248.81	16	0	Unmodified	6450500	21238000	5526300	9655600	25814000	14431000	21425000	11956000	14822000	15985000	15925000	18341000	24799000	46717000	21544000	13366000	15361000	9991700	16159000	6809900	23185000	21665000	3463700	28211000	12363000	19986000	19032000	7080100	By MS/MS	By MS/MS	By MS/MS	By MS/MS	By MS/MS	By MS/MS	By MS/MS	By MS/MS	By MS/MS	By MS/MS	By MS/MS	By MS/MS	By MS/MS
EVQLVESGGGLVQPGRSLK	gi|371447587	1952.07	977.035	2	101.23	19	1	Unmodified	0	0	0	0	0	0	0	0	0	0	0	0	0	0	617240	0	791380	0	0	0	0	0	0	0	0	0	0	0	By matching	By matching	By matching	By matching	By matching	By matching	By matching	By matching	By matching	By matching	By matching	By matching	By matching
EVQLVESGGGLVQPGTSLR	gi|33319006	1925.02	963.511	2	161.14	19	0	Unmodified	0	0	1839100	0	0	0	0	0	0	0	0	0	0	0	0	0	0	0	0	0	0	0	0	0	0	0	0	0	By matching	By matching	By MS/MS	By matching	By matching	By matching	By matching	By matching	By matching	By matching	By matching	By matching	By matching
EVQLVESGGGLVR	gi|751361580	1341.73	671.863	2	157.35	13	0	Unmodified	739420	0	0	737940	0	271740	391870	0	1011000	1355600	127980	419400	253170	0	120400	473000	0	423590	0	0	481600	0	105230	221230	161230	0	0	0	By MS/MS	By matching	By matching	By MS/MS	By matching	By matching	By matching	By matching	By MS/MS	By MS/MS	By matching	By matching	By matching
EVQLVESGGGLVRPGGSLR	gi|751361580	1909.04	955.519	2	168.16	19	1	Unmodified	3096900	0	1754100	0	2773800	4239100	1964100	0	5568900	0	3070400	2429800	0	3832300	1770100	0	2808000	0	2068900	2704800	3090600	0	1693500	1583600	0	2164000	0	1398800	By MS/MS	By matching	By MS/MS	By matching	By MS/MS	By MS/MS	By MS/MS	By matching	By MS/MS	By matching	By MS/MS	By MS/MS	By matching
EVQLVESGGGLVTPGGSLR	gi|87833	1853.98	927.992	2	102.07	19	0	Unmodified	0	750410	1193100	0	0	587780	0	0	0	0	966560	965400	1352300	1809900	0	0	1037200	0	0	0	0	0	0	0	1246700	0	0	0	By matching	By matching	By matching	By matching	By MS/MS	By matching	By matching	By matching	By matching	By matching	By matching	By matching	By MS/MS
EVQLVESGGGPVQPGGSLR	gi|118405861	1864.96	622.655	3	72.187	19	0	Unmodified	0	142820	0	0	1525400	147190	28180	841710	660940	520700	931510	0	0	0	906780	205310	1047000	0	0	0	520080	1043500	0	830180	0	1871900	421570	0	By matching	By matching	By matching	By matching	By MS/MS	By matching	By matching	By MS/MS	By matching	By matching	By matching	By matching	By matching
EVQLVESGGGSVKPGGSLR	gi|519672950	1854.98	928.49	2	89.659	19	1	Unmodified	0	0	0	0	0	0	0	0	1698900	0	0	0	0	0	0	0	0	0	0	0	0	0	0	0	0	0	0	0	By matching	By matching	By matching	By matching	By matching	By matching	By matching	By matching	By MS/MS	By matching	By matching	By matching	By matching
EVQLVESGGGSVQPGGSLR	gi|695942138	1854.94	928.472	2	206.11	19	0	Unmodified	0	421630	167910	152760	288740	302090	2759900	2194500	642170	330960	290350	303110	442820	928500	658640	1834100	736960	226280	1724300	377180	404470	643930	0	1101000	603100	486720	292030	706190	By matching	By MS/MS	By matching	By matching	By MS/MS	By matching	By MS/MS	By MS/MS	By MS/MS	By matching	By matching	By MS/MS	By MS/MS
EVQLVESGGGVIQPGK	gi|219566873	1595.85	798.926	2	96.096	16	0	Unmodified	0	0	0	316860	698780	379750	0	0	293840	0	0	944050	0	0	609060	0	0	0	0	0	0	799110	74161	0	0	0	0	0	By matching	By matching	By matching	By matching	By MS/MS	By matching	By matching	By matching	By matching	By matching	By matching	By matching	By matching
EVQLVESGGGVIQPGKSLR	gi|219566873	1952.07	977.035	2	96.234	19	1	Unmodified	0	515340	0	0	0	0	0	0	0	236890	198900	0	0	0	0	0	0	0	0	0	0	0	0	0	247670	0	0	0	By matching	By MS/MS	By matching	By matching	By matching	By matching	By matching	By matching	By matching	By matching	By matching	By matching	By matching
EVQLVESGGGVIRPGGSLR	gi|519671980	1909.04	955.519	2	135.57	19	1	Unmodified	733040	0	1754100	0	0	4239100	2572700	1835800	0	1851900	833030	0	0	1029200	2276000	815550	751060	2007400	481930	798870	0	658990	0	0	1035200	0	0	0	By MS/MS	By matching	By MS/MS	By matching	By matching	By MS/MS	By MS/MS	By MS/MS	By matching	By MS/MS	By matching	By matching	By matching
EVQLVESGGGVVKPGGSLR	gi|930624974	1867.02	934.508	2	93.381	19	1	Unmodified	0	0	0	995520	0	0	0	0	0	0	0	0	0	1074300	0	0	0	0	196150	337250	86052	0	0	0	0	0	0	0	By matching	By matching	By matching	By MS/MS	By matching	By matching	By matching	By matching	By matching	By matching	By matching	By matching	By matching
EVQLVESGGGVVQPGGSLR	gi|939186302	1866.98	934.49	2	261.94	19	0	Unmodified	2390100	6222100	4891300	3618500	15292000	1227800	5651400	0	0	7579100	9680000	9182600	0	2592300	0	3111200	1579500	9213100	1995100	0	8205100	0	0	0	1527600	0	0	1785800	By MS/MS	By MS/MS	By MS/MS	By MS/MS	By MS/MS	By MS/MS	By MS/MS	By matching	By matching	By MS/MS	By MS/MS	By MS/MS	By matching
EVQLVESGGGVVQPGKSLR	gi|588293178	1938.05	970.027	2	78.554	19	1	Unmodified	0	0	0	0	0	0	0	0	0	0	0	0	0	0	0	0	0	0	0	0	0	0	0	0	0	0	3687200	0	By matching	By matching	By matching	By matching	By matching	By matching	By matching	By matching	By matching	By matching	By matching	By matching	By matching
EVQLVESGGGVVQPGR	gi|194719555	1609.84	805.921	2	87.647	16	0	Unmodified	0	0	0	0	0	374520	0	175570	0	0	469310	0	0	0	686880	0	943820	0	0	0	0	364170	245100	0	313940	1146200	0	0	By matching	By matching	By matching	By matching	By matching	By MS/MS	By matching	By matching	By matching	By matching	By matching	By matching	By matching
EVQLVESGGGVVR	gi|930624926	1327.71	664.855	2	77.776	13	0	Unmodified	0	0	0	0	0	0	0	0	0	0	0	0	0	0	0	0	0	0	0	349870	0	0	0	0	0	0	0	0	By matching	By matching	By matching	By matching	By matching	By matching	By matching	By matching	By matching	By matching	By matching	By matching	By matching
EVQLVESGGGVVRPGDSLR	gi|247425491	1953.03	977.514	2	97.713	19	1	Unmodified	0	0	0	0	0	0	0	0	0	0	0	0	0	0	0	0	0	433990	0	0	0	0	0	107520	0	0	0	0	By matching	By matching	By matching	By matching	By matching	By matching	By matching	By matching	By matching	By matching	By matching	By matching	By matching
EVQLVESGGGVVRPGGSLR	gi|930624926	1895.02	948.511	2	151.31	19	1	Unmodified	1364200	455400	846720	4842600	1388000	1967500	1114800	0	4939300	0	1025400	787520	1685600	1571000	962920	564700	3706500	2575800	1389200	852630	1498100	990360	0	923880	234820	0	0	4587100	By matching	By matching	By matching	By matching	By matching	By MS/MS	By matching	By matching	By MS/MS	By matching	By MS/MS	By matching	By matching
EVQLVESGGGVVRPGGSVR	gi|21668916	1881.01	941.503	2	103.73	19	1	Unmodified	0	0	0	0	0	0	0	0	0	0	0	0	0	0	1273500	0	0	0	0	0	0	0	0	0	0	0	0	0	By matching	By matching	By matching	By matching	By matching	By matching	By matching	By matching	By matching	By matching	By matching	By matching	By matching
EVQLVESGGGWVQPGGSLR	gi|315487886	1953.99	977.995	2	183.18	19	0	Unmodified	0	0	0	0	0	0	188120	0	0	1293900	0	0	0	0	0	0	0	0	0	394370	0	0	0	0	0	0	1636900	0	By matching	By matching	By matching	By matching	By matching	By matching	By matching	By matching	By matching	By MS/MS	By matching	By matching	By matching
EVQLVESGGKVVQPGGSLR	gi|247424689	1938.05	970.027	2	149.12	19	1	Unmodified	159090	0	141780	0	0	0	131400	201590	1297300	1708100	163700	3147900	170960	0	0	272230	3839800	6049800	3149400	2240700	228930	1377900	989560	2061700	0	6909600	3932200	7750700	By matching	By matching	By matching	By matching	By matching	By matching	By matching	By matching	By matching	By matching	By matching	By MS/MS	By matching
EVQLVESGGNLVQPGGSLR	gi|33319656	1938.02	970.009	2	228.65	19	0	Unmodified	4121500	4432100	1336500	265830	1893300	1714900	4133600	4551100	1817900	1480000	4963700	4263600	6401300	5171800	3954500	9017500	5889900	4681700	3255900	5379200	3215800	1075000	984930	2895700	2137100	5885000	4476200	6324000	By MS/MS	By MS/MS	By MS/MS	By matching	By MS/MS	By MS/MS	By MS/MS	By MS/MS	By MS/MS	By MS/MS	By MS/MS	By MS/MS	By MS/MS
EVQLVESGGNLVQPGR	gi|33319010	1680.88	841.44	2	97.129	16	0	Unmodified	0	0	0	0	0	153880	408130	143930	0	176540	148860	925740	799450	290690	480870	352250	0	169950	1049000	123750	981880	446510	0	707820	637110	321150	1487400	0	By matching	By matching	By matching	By matching	By matching	By matching	By MS/MS	By matching	By matching	By matching	By matching	By MS/MS	By MS/MS
EVQLVESGGR	gi|371446881	1072.55	537.276	2	180.66	10	0	Unmodified	1137800	1010200	2252300	2300400	794930	3074100	789650	671750	910890	917520	1335500	897150	776220	1615700	1260000	1763600	1026200	787170	604940	816580	1187800	898680	1256300	1918800	794960	615060	105350	1282600	By matching	By MS/MS	By MS/MS	By MS/MS	By matching	By MS/MS	By MS/MS	By MS/MS	By MS/MS	By matching	By MS/MS	By MS/MS	By MS/MS
EVQLVESGGSLVQPGGSLR	gi|371445721	1911.01	956.503	2	132.6	19	0	Unmodified	427860	0	730130	0	0	379760	0	0	0	0	0	0	0	0	0	0	0	0	0	0	0	0	0	0	1077600	0	0	0	By matching	By matching	By MS/MS	By matching	By matching	By matching	By matching	By matching	By matching	By matching	By matching	By matching	By matching
EVQLVESGGTLIQPGGSLR	gi|662563727	1939.04	647.346	3	146.2	19	0	Unmodified	2431000	0	0	0	0	0	683790	0	0	0	0	0	0	0	0	782460	0	0	0	0	731230	235420	0	0	0	0	0	462830	By MS/MS	By matching	By matching	By matching	By matching	By matching	By MS/MS	By matching	By matching	By matching	By matching	By matching	By matching
EVQLVESGGTLVKPGGSLR	gi|219815555	1925.06	963.529	2	153.25	19	1	Unmodified	0	0	0	0	0	0	0	0	0	0	0	1621200	0	0	340300	0	0	0	0	0	0	0	0	0	0	0	0	0	By matching	By matching	By matching	By matching	By matching	By matching	By matching	By matching	By matching	By matching	By matching	By MS/MS	By matching
EVQLVESGGTVVQPGGSLR	gi|695943143	1911.01	956.503	2	126.04	19	0	Unmodified	0	0	730130	0	0	0	0	0	0	0	0	0	0	0	0	0	0	0	0	0	0	0	0	0	0	0	0	0	By matching	By matching	By MS/MS	By matching	By matching	By matching	By matching	By matching	By matching	By matching	By matching	By matching	By matching
EVQLVESGGVVVQPGGSLR	gi|237701930	1909.03	955.513	2	140.27	19	0	Unmodified	258280	0	0	0	257630	374010	182170	336420	514670	0	765710	216650	595110	128790	0	299150	0	776640	184850	0	248430	234510	111780	0	0	201450	1830600	0	By matching	By matching	By matching	By matching	By matching	By matching	By matching	By matching	By matching	By matching	By matching	By matching	By matching
EVQLVESGPGLVK	gi|545719948	1353.75	677.875	2	114.24	13	0	Unmodified	0	0	0	0	0	0	0	0	0	0	0	0	0	0	0	0	540690	0	0	0	0	0	0	0	0	0	0	0	By matching	By matching	By matching	By matching	By matching	By matching	By matching	By matching	By matching	By matching	By matching	By matching	By matching
EVQLVETGGDLVQPGGSLR	gi|247425576	1953.02	977.508	2	160.67	19	0	Unmodified	0	0	0	0	0	0	0	0	0	0	0	0	0	0	0	0	7228000	0	0	0	0	0	0	3058500	204040	377640	685720	3725900	By matching	By matching	By matching	By matching	By matching	By matching	By matching	By matching	By matching	By matching	By matching	By matching	By matching
EVQLVETGGGLIQPGGSLR	gi|32906	1909.03	955.513	2	254.54	19	0	Unmodified	2610300	807470	0	0	0	0	5252700	0	0	0	0	4297200	6222900	9806800	1328300	2684500	0	0	0	8393400	1791300	631760	2437400	0	0	905440	1823400	5083200	By MS/MS	By matching	By matching	By matching	By matching	By matching	By MS/MS	By matching	By matching	By matching	By matching	By MS/MS	By MS/MS
EVQLVETGGGLVK	gi|90823193	1327.73	664.867	2	132.86	13	0	Unmodified	0	0	0	0	0	0	0	0	1942400	88679	0	0	0	0	0	86543	0	65495	0	0	0	0	113270	278380	0	0	0	0	By matching	By matching	By matching	By matching	By matching	By matching	By matching	By matching	By MS/MS	By matching	By matching	By matching	By matching
EVQLVETGGGLVKPGGSLR	gi|90823193	1895.05	948.524	2	119.5	19	1	Unmodified	998270	0	0	0	0	0	0	0	1355400	0	352070	0	0	0	0	723710	590440	0	0	0	0	0	0	0	0	0	0	0	By MS/MS	By matching	By matching	By matching	By matching	By matching	By matching	By matching	By MS/MS	By matching	By matching	By matching	By matching
EVQLVETGGGLVQPGGSLR	gi|63102746	1895.01	948.506	2	246.9	19	0	Unmodified	0	340320	0	27028000	311550	346030	5530500	28096000	481810	467020	12997000	0	154090000	5161900	53903000	177350	1102800	0	1005800	0	0	70857000	0	0	0	74847000	0	6114600	By matching	By matching	By matching	By MS/MS	By matching	By matching	By MS/MS	By MS/MS	By matching	By matching	By MS/MS	By matching	By MS/MS
EVQLVETGGGLVQPGR	gi|400653669	1637.87	819.937	2	85.493	16	0	Unmodified	0	362230	165400	435890	1142300	376020	1395400	322320	608440	0	476680	593500	778450	712570	0	0	279170	0	0	0	0	0	0	472120	112110	0	552080	0	By matching	By matching	By matching	By matching	By matching	By matching	By MS/MS	By matching	By matching	By matching	By matching	By matching	By MS/MS
EVQLVETGGGVVQPGR	gi|63102861	1623.86	542.286	3	104.09	16	0	Unmodified	0	0	0	0	0	0	548920	0	0	0	0	0	0	0	0	0	0	0	0	0	0	0	0	0	0	0	0	0	By matching	By matching	By matching	By matching	By matching	By matching	By MS/MS	By matching	By matching	By matching	By matching	By matching	By matching
EVQLVQSATEVK	gi|51103387	1329.71	665.857	2	107.39	12	0	Unmodified	192020	0	0	0	0	0	0	0	0	0	0	0	0	0	0	0	0	0	0	0	0	0	0	0	0	0	0	384720	By matching	By matching	By matching	By matching	By matching	By matching	By matching	By matching	By matching	By matching	By matching	By matching	By matching
EVQLVQSGAAVK	gi|58222014	1227.68	614.841	2	166.62	12	0	Unmodified	292370	0	296140	981390	243000	478550	165870	155720	487010	274830	179920	313020	209200	220730	0	347970	195410	433200	157250	500690	373930	0	143480	158130	197360	169690	0	337330	By matching	By matching	By matching	By MS/MS	By matching	By matching	By matching	By matching	By matching	By matching	By matching	By matching	By matching
EVQLVQSGADVK	gi|910276554	1271.67	636.836	2	195.71	12	0	Unmodified	325380	93735	803120	132000	187130	98464	176690	359450	324640	189680	188920	1391600	129030	487880	189460	1083900	1220900	0	0	338490	135550	181500	1059800	499440	0	603360	0	314070	By matching	By matching	By MS/MS	By matching	By matching	By matching	By matching	By MS/MS	By matching	By matching	By matching	By MS/MS	By matching
EVQLVQSGAEAK	gi|1685229	1257.66	629.828	2	214.42	12	0	Unmodified	231080	222400	573050	436340	406210	691230	1087200	262170	1046100	1544100	369240	285420	117870	285170	264000	416350	424880	472350	117200	5500400	137690	60371	402530	143820	532270	371200	87983	211310	By matching	By MS/MS	By MS/MS	By MS/MS	By MS/MS	By MS/MS	By MS/MS	By MS/MS	By MS/MS	By matching	By MS/MS	By MS/MS	By matching
EVQLVQSGAELK	gi|80975561	1299.7	650.852	2	214.42	12	0	Unmodified	3572100	801070	2439100	803240	1182700	1509000	1023400	1012100	3621200	1145800	1550800	1206900	0	1234700	1237600	2152800	2025800	714310	583940	1122500	1957800	903370	1425100	1310100	899600	1277100	0	1250500	By MS/MS	By MS/MS	By matching	By MS/MS	By MS/MS	By MS/MS	By MS/MS	By MS/MS	By MS/MS	By matching	By MS/MS	By MS/MS	By MS/MS
EVQLVQSGAELR	gi|116795035	1327.71	664.855	2	126.56	12	0	Unmodified	0	183070	301450	103810	233340	1014000	329740	145580	1297400	325400	1616600	216680	0	340420	0	329240	359680	267060	0	234390	0	208580	580760	0	382720	0	275250	0	By matching	By matching	By matching	By matching	By matching	By MS/MS	By matching	By matching	By MS/MS	By matching	By matching	By matching	By matching
EVQLVQSGAEMK	gi|63102728	1317.66	659.83	2	140.01	12	0	Oxidation (M)	0	0	32481	0	0	0	0	0	315520	0	0	0	0	0	0	0	0	0	0	0	0	0	0	0	0	0	0	0	By matching	By matching	By matching	By matching	By matching	By matching	By matching	By matching	By MS/MS	By matching	By matching	By matching	By matching
EVQLVQSGAEVK	gi|761232722	1285.69	643.844	2	301.35	12	0	Unmodified	41980000	1848600	54348000	35426000	3272400	42842000	32884000	31572000	54282000	0	39997000	35319000	47235000	3869500	24055000	40979000	33986000	27204000	20972000	43593000	24657000	17384000	25158000	1922400	1566700	25205000	16070000	37889000	By MS/MS	By MS/MS	By MS/MS	By MS/MS	By MS/MS	By MS/MS	By MS/MS	By MS/MS	By MS/MS	By matching	By MS/MS	By MS/MS	By MS/MS
EVQLVQSGAEVKEPGESLR	gi|222537891	2054.06	1028.03	2	149.95	19	1	Unmodified	0	0	629300	0	0	0	0	0	163920	86952	61175	0	0	0	0	0	0	0	645760	0	0	0	0	0	0	0	0	93516	By matching	By matching	By MS/MS	By matching	By matching	By matching	By matching	By matching	By matching	By matching	By matching	By matching	By matching
EVQLVQSGAEVKK	gi|761232722	1413.78	707.891	2	134.61	13	1	Unmodified	0	0	0	0	0	453810	0	0	0	0	0	0	0	0	0	0	0	0	0	0	0	0	0	0	0	0	0	0	By matching	By matching	By matching	By matching	By matching	By MS/MS	By matching	By matching	By matching	By matching	By matching	By matching	By matching
EVQLVQSGAEVKKPGESLK	gi|761232722	2025.11	1013.56	2	241.98	19	2	Unmodified	6900800	5538600	7086000	2556300	5727800	8879200	8621200	4608500	6012300	3127700	5835400	5299300	5136400	4729500	3070200	5930000	4396900	2084700	4068200	3135700	5728500	4854200	4208000	2059600	3629800	4052100	3151600	3427100	By MS/MS	By MS/MS	By MS/MS	By MS/MS	By MS/MS	By MS/MS	By MS/MS	By MS/MS	By MS/MS	By MS/MS	By MS/MS	By MS/MS	By MS/MS
EVQLVQSGAEVKKPGESLR	gi|118406453	2053.12	1027.56	2	277.07	19	2	Unmodified	9922900	840480	12208000	1470200	833250	4415100	1434000	2128500	1970200	2382100	2835800	3197600	400190	441600	0	3408500	2336600	2196700	583360	3316900	950530	583530	3758600	975500	418140	462160	221200	4787500	By MS/MS	By matching	By MS/MS	By matching	By matching	By MS/MS	By matching	By MS/MS	By matching	By MS/MS	By MS/MS	By MS/MS	By matching
EVQLVQSGAEVR	gi|816457339	1313.69	657.847	2	217.46	12	0	Unmodified	2559600	1843700	4568700	5891100	3807800	3284300	3190700	1884700	4273100	2327600	1899800	2313800	1433200	2438500	1991300	2981000	2060500	1969500	2462500	2573700	1821700	1624700	2679600	2373900	1838100	2189200	2693600	2864500	By MS/MS	By MS/MS	By MS/MS	By MS/MS	By MS/MS	By MS/MS	By MS/MS	By MS/MS	By MS/MS	By MS/MS	By MS/MS	By MS/MS	By MS/MS
EVQLVQSGAVVR	gi|695942470	1283.72	642.86	2	184.34	12	0	Unmodified	0	0	0	0	0	0	0	0	0	0	0	0	0	1065100	125780	0	0	0	0	0	0	0	0	0	0	0	0	0	By matching	By matching	By matching	By matching	By matching	By matching	By matching	By matching	By matching	By matching	By matching	By matching	By matching
EVQLVQSGGAVVQPGGSLK	gi|74147403	1852.01	927.003	2	125.79	19	0	Unmodified	0	0	275990	0	373280	0	0	0	0	0	0	0	158770	120510	0	0	0	0	0	0	532680	0	0	0	0	0	0	0	By matching	By matching	By matching	By matching	By matching	By matching	By matching	By matching	By matching	By matching	By matching	By matching	By matching
EVQLVQSGGDLVQPGGSLR	gi|74146652	1938.02	970.009	2	196.36	19	0	Unmodified	0	0	0	0	1893300	0	0	1972000	0	0	0	0	0	0	1581100	0	0	0	3255900	0	0	0	0	2895700	0	4502800	0	0	By matching	By matching	By matching	By matching	By MS/MS	By matching	By matching	By MS/MS	By matching	By matching	By matching	By matching	By matching
EVQLVQSGGEVAK	gi|320042338	1342.71	672.355	2	140.82	13	0	Unmodified	404680	201910	911250	139230	0	357340	487980	602770	405210	425760	1423600	1449700	0	0	663800	1081000	803450	753240	555050	1255400	676420	355940	329290	868700	660690	800380	1115100	3138800	By MS/MS	By matching	By MS/MS	By matching	By matching	By MS/MS	By MS/MS	By MS/MS	By matching	By MS/MS	By MS/MS	By MS/MS	By matching
EVQLVQSGGEVK	gi|340002497	1271.67	636.836	2	169.58	12	0	Unmodified	456250	230410	442760	264340	348570	452370	370900	254180	767220	1198100	707090	667950	128990	753060	336280	878290	1004700	209250	494250	253740	0	0	827960	0	718710	437480	0	0	By matching	By matching	By MS/MS	By matching	By matching	By matching	By matching	By MS/MS	By MS/MS	By matching	By matching	By matching	By matching
EVQLVQSGGEVR	gi|74146468	1299.68	650.839	2	95.981	12	0	Unmodified	0	0	91673	0	0	144680	0	0	95009	186220	134400	0	0	85218	0	0	0	482170	0	0	177970	198100	132730	117980	0	0	0	0	By matching	By matching	By matching	By matching	By matching	By matching	By matching	By matching	By matching	By matching	By matching	By matching	By matching
EVQLVQSGGGLIQPGGSLR	gi|114147413	1894.03	948.014	2	78.401	19	0	Unmodified	0	0	0	0	0	0	0	0	0	0	0	0	0	0	0	0	0	0	638830	0	0	0	0	0	0	0	0	0	By matching	By matching	By matching	By matching	By matching	By matching	By matching	By matching	By matching	By matching	By matching	By matching	By matching
EVQLVQSGGGLSQPAGSLR	gi|910276900	1881.99	941.995	2	86.573	19	0	Unmodified	0	9382800	0	0	0	0	0	6626300	0	0	0	0	0	0	0	7409500	7505500	0	0	0	9779800	0	0	0	3564800	0	0	0	By matching	By MS/MS	By matching	By matching	By matching	By matching	By matching	By MS/MS	By matching	By matching	By matching	By matching	By matching
EVQLVQSGGGLVEPGGSLR	gi|224979536	1881	627.999	3	137.27	19	0	Unmodified	0	0	0	0	0	0	0	0	0	0	0	5379300	0	0	0	0	0	0	0	0	0	0	0	0	0	0	0	0	By matching	By matching	By matching	By matching	By matching	By matching	By matching	By matching	By matching	By matching	By matching	By MS/MS	By matching
EVQLVQSGGGLVKPGGSLR	gi|392311589	1880.05	941.024	2	180.03	19	1	Unmodified	397580	1236000	1973900	0	1806100	806100	1346000	636740	377760	253980	309380	916820	1330700	817660	2080300	279520	852190	864570	0	812440	603020	515400	1120900	803360	116250	245250	255570	868710	By matching	By MS/MS	By MS/MS	By matching	By MS/MS	By matching	By MS/MS	By matching	By matching	By matching	By matching	By matching	By MS/MS
EVQLVQSGGGLVQPGESLR	gi|33319678	1952.03	977.016	2	223.86	19	0	Unmodified	0	972350	0	0	0	0	0	0	0	0	0	0	0	0	0	0	0	0	0	0	0	0	0	0	0	0	0	0	By matching	By MS/MS	By matching	By matching	By matching	By matching	By matching	By matching	By matching	By matching	By matching	By matching	By matching
EVQLVQSGGGLVQPGGSLK	gi|662563842	1852.01	927.003	2	76.329	19	0	Unmodified	0	0	0	0	0	0	0	0	0	0	0	0	0	0	0	0	0	0	0	0	532680	0	0	0	0	0	0	0	By matching	By matching	By matching	By matching	By matching	By matching	By matching	By matching	By matching	By matching	By matching	By matching	By matching
EVQLVQSGGGLVQPGGSLR	gi|74147479	1880.01	941.006	2	231.4	19	0	Unmodified	3501500	3362200	1920300	5465000	3098800	2079900	2597500	3018800	7428900	2039400	3489200	958550	3996600	3127700	0	3437300	0	2635000	2006300	2476500	2165600	2072400	1476500	2329000	1824300	2820500	0	1889200	By MS/MS	By MS/MS	By MS/MS	By MS/MS	By MS/MS	By MS/MS	By MS/MS	By MS/MS	By MS/MS	By MS/MS	By MS/MS	By MS/MS	By MS/MS
EVQLVQSGGGVVRPGGSLR	gi|519672094	1894.04	948.019	2	131.31	19	1	Unmodified	0	0	0	0	0	0	0	0	0	0	0	0	0	0	0	0	0	0	0	0	0	0	0	0	0	3853600	0	0	By matching	By matching	By matching	By matching	By matching	By matching	By matching	By matching	By matching	By matching	By matching	By matching	By matching
EVQLVQSGGVVVQPGGSLR	gi|5834204	1908.04	955.021	2	65.085	19	0	Unmodified	0	0	0	0	967960	0	0	0	0	0	0	0	0	0	0	0	0	185950	0	0	0	0	0	0	0	0	0	0	By matching	By matching	By matching	By matching	By MS/MS	By matching	By matching	By matching	By matching	By matching	By matching	By matching	By matching
EVQLVQSGPEVK	gi|118405995	1311.7	656.852	2	201.09	12	0	Unmodified	3614800	2145000	3702500	925960	1957200	2661400	1601100	1623400	6375500	2173000	2090000	7105600	2287400	1947900	6190400	2600400	1348800	3549900	2218400	1598600	1227200	823140	3704400	1130400	653510	978890	11596000	2153200	By MS/MS	By MS/MS	By MS/MS	By MS/MS	By MS/MS	By MS/MS	By MS/MS	By MS/MS	By MS/MS	By MS/MS	By MS/MS	By MS/MS	By MS/MS
EVQLVQSGSELK	gi|74147247	1315.7	658.849	2	174.72	12	0	Unmodified	0	0	0	0	0	0	614130	922170	0	0	0	0	0	0	0	0	0	0	0	0	0	0	0	0	0	0	0	0	By matching	By matching	By matching	By matching	By matching	By matching	By MS/MS	By MS/MS	By matching	By matching	By matching	By matching	By matching
EVQLVQSGSEVK	gi|118405945	1301.68	651.841	2	165.51	12	0	Unmodified	0	123420	164100	118910	128520	149610	0	153300	349520	583720	704710	180700	178170	166340	339230	839390	103990	297180	285700	196330	121620	211170	159480	214130	0	78763	60077	702960	By matching	By matching	By MS/MS	By matching	By matching	By matching	By matching	By matching	By MS/MS	By MS/MS	By MS/MS	By MS/MS	By matching
EVQLVQSGTEVK	gi|241913100	1315.7	658.849	2	237.41	12	0	Unmodified	1648800	599300	1234400	857610	795770	852770	614130	922170	1414200	1630400	637320	3107200	933690	680440	563630	1440700	1007700	374090	309350	612710	887960	439910	984640	878700	1241800	358860	229170	1413600	By MS/MS	By MS/MS	By MS/MS	By MS/MS	By MS/MS	By MS/MS	By MS/MS	By MS/MS	By MS/MS	By MS/MS	By MS/MS	By MS/MS	By MS/MS
EVQLVQSGVEVK	gi|114147626	1313.72	657.86	2	236.28	12	0	Unmodified	1422700	1742800	2217300	0	809260	1642300	1287900	577210	3915600	1059700	719960	1066500	835220	715380	647140	766740	823320	537770	427720	1933600	379300	246030	1721000	377930	410560	276680	155920	1733900	By MS/MS	By MS/MS	By MS/MS	By matching	By MS/MS	By MS/MS	By MS/MS	By MS/MS	By MS/MS	By MS/MS	By MS/MS	By MS/MS	By MS/MS
EVQLVQSR	gi|5305649	957.524	479.762	2	142.98	8	0	Unmodified	1009600	152660	431200	280920	574020	491520	357150	232650	372420	386200	277660	257720	115740	240470	144420	602480	477620	350080	344480	199860	234960	254540	301870	180170	265870	222380	52788	175890	By MS/MS	By MS/MS	By MS/MS	By MS/MS	By MS/MS	By MS/MS	By MS/MS	By MS/MS	By MS/MS	By MS/MS	By MS/MS	By MS/MS	By matching
EVQLVUSGGGLVKPGGSLR	gi|25056062	1902.94	952.471	2	71.592	19	1	Acetyl (Protein N-term)	0	0	0	0	0	0	2215500	0	0	0	0	0	0	0	0	0	0	0	0	0	0	0	0	0	0	0	0	0	By matching	By matching	By matching	By matching	By matching	By matching	By MS/MS	By matching	By matching	By matching	By matching	By matching	By matching
EVQLVVSGGNLVQPGGSLR	gi|519674360	1908.04	955.021	2	125.03	19	0	Unmodified	0	0	0	0	0	0	0	0	0	0	0	0	0	0	0	0	0	0	0	0	0	350010	0	0	3349900	0	0	0	By matching	By matching	By matching	By matching	By matching	By matching	By matching	By matching	By matching	By matching	By matching	By matching	By matching
EVQLWESGGGLVQPGGSLR	gi|519672210	1968.01	985.003	2	87.352	19	0	Unmodified	0	368140	449150	0	279900	759980	0	110100	0	107930	0	268340	911670	0	0	247070	256390	279750	0	0	0	114240	0	208060	0	729380	0	180250	By matching	By matching	By matching	By matching	By matching	By MS/MS	By matching	By matching	By matching	By matching	By matching	By matching	By MS/MS
EVQMVETGGGLIQPGGSLR	gi|630868368	1926.98	964.492	2	99.273	19	0	Unmodified	0	0	0	0	0	1196100	1421000	0	0	0	0	0	0	0	1426300	0	0	0	0	0	0	0	0	0	1255500	0	0	0	By matching	By matching	By matching	By matching	By matching	By MS/MS	By MS/MS	By matching	By matching	By matching	By matching	By matching	By matching
EVQPVESGGGLVQPGGSLR	gi|247424583	1864.96	622.655	3	66.152	19	0	Unmodified	1250000	699610	728280	0	1172100	59011	924150	431130	327880	444130	106880	235490	1287400	1386600	224820	1332000	1064300	668060	185880	1697000	300210	954620	357550	0	249640	716840	231100	213680	By matching	By matching	By matching	By matching	By matching	By matching	By MS/MS	By MS/MS	By matching	By matching	By matching	By matching	By MS/MS
EVQQLESGGGLVQPGGSLR	gi|4836298	1909.99	955.993	2	88.385	19	0	Unmodified	0	0	0	3547200	0	0	0	0	0	0	0	0	0	0	0	0	0	0	0	0	0	0	0	0	0	0	0	0	By matching	By matching	By matching	By MS/MS	By matching	By matching	By matching	By matching	By matching	By matching	By matching	By matching	By matching
EVQQVESGGGLVQPGGSLR	gi|21670557	1895.97	948.985	2	105.92	19	0	Unmodified	0	0	0	0	624860	0	0	0	0	0	0	0	0	0	0	0	0	0	0	0	0	0	0	0	0	0	0	0	By matching	By matching	By matching	By matching	By MS/MS	By matching	By matching	By matching	By matching	By matching	By matching	By matching	By matching
[truncated: 2,548 more rows]
[truncated: 15 more columns]

## Sheet: Peptides hits- V, J and C genes
Supplementary file 1: MaxQuant generated output matrix combined with IgBLASTp search results. IgBLASTp search results includes most homologous IMGT hit, bitscore, E-value, position within the IgG framework, Matches, Missmatch/Mutation, Gaps, Alignment match score, Query start and end position, Sequence start and end position.
[truncated: 3,589 more rows]
[truncated: 34 more columns]

[truncated: 3 more sheets: Peptide hits to V gene, Peptide hits to J gene, Peptide hits to C gene]
