# Supplementary material for: Peptides of the variable IgG domain as potential biomarker candidates in primary open-angle glaucoma (POAG)
Source: Oxford University Press journal article supplement (doi:10.1093/hmg/ddx332), 2017-09-19
Supplement: ddx332_supplementary_file_2.xlsx [file ddx332_supplementary_file_2.xlsx]

## Sheet: Discovery search data
Supplementary file 2: Statistical analysis of IgG V domain peptide sequences identified in the discovery study. Peptide sequences are detectable in at least one study group (15 CTRL or 13 POAG). Data matrix contains sequence, protein hit, score, mass, charge, m/z, length, p-value, log2 fold change and IgBLASTp search results (most homologous IMGT hit, bitscore, E-value, position within the IgG fr…
CDR: complementarity determining region FR: framework region +: Peptide sequence fulfilled criteria -: Peptide sequence failed to fulfill criteria
Sequence	Protein	Score	Mass	Charges	m/z	Length	p-value ≤ 0.05	Volcano plot (p-value ≤ 0.05; log 2 fold change ≥ 0.5)	p-value	log2 fold difference	IMGT hit	Bitscore	E-value	IgG framework	Alignment match score
AASSLQSGVPSR	gi|197115765	129.76	1158.6	2	580.3	12	-	-	0.125392	0.487125	IGKV1-12*02	25.8	0.0008	CDR2	100
AEDTALYYCAK	gi|34364651	215.56	1303.58	2	652.79	11	-	-	0.468767	0.196994	IGHV3-43D*01	27.7	0.0002	FR3	100
AEDTALYYCAR	gi|2921514	211.64	1331.58	2	666.79	11	-	-	0.535106	0.131721	IGHV3-53*01	26.6	0.0004	FR3	90.9
AEDTAVYFCAR	gi|404551428	173.64	1301.57	2	651.79	11	-	-	0.352225	0.165224	IGHV3-53*01	26.2	0.0006	FR3	90.9
AEDTAVYYCAR	gi|209402818	169.58	1317.57	2	659.78	11	-	-	0.241791	0.242539	IGHV3-53*01	27.7	0.0001	FR3	100
AGQAPVLVIYK	gi|3142472	129.85	1157.68	2	579.84	11	-	-	0.0552968	0.659403	IGLV3-10*02	24.3	0.003	FR2	90.9
AIQMTQSPSSLSASVGDR	gi|662564787	232.37	1833.89	2	917.94	18	+	+	3.78269e-05	1.97048	IGKV1-6*01	37	7e-08	FR1	100
ALIYLASTLQSGVPSR	gi|18025706	165.89	1674.93	2	838.47	16	+	-	0.0402834	0.54918	IGKV1-27*01	30	2e-05	CDR2	93.3
APNLLIYK	gi|323432880	172.15	930.554	2	466.28	8	-	-	0.213937	0.263623	IGKV1-5*03	18.1	0.38	FR2	87.5
ASDTALYYCAR	gi|56786088	195.27	1289.57	2	645.79	11	-	-	0.576584	0.100208	IGHV5-10-1*01	26.6	0.0004	FR3	90.9
ASDTAMYYCAR	gi|761232722	145.46	1307.53	2	654.76	11	+	+	0.000173142	1.29799	IGHV5-10-1*01	27.7	0.0001	FR3	100
ASGVPDRFSGSGSGTDFTLK	gi|218783338	195.86	1984.95	2	993.47	20	-	-	0.687642	0.0845051	IGKV2-28*01	44.3	2e-10	FR3	100
ASGVPDRFSGSGSGTDFTLKISR	gi|218783338	115.99	2341.17	2	1171.58	23	-	-	0.0636706	-0.98151	IGKV2-28*01	49.3	4e-12	FR3	100
ASGVPDRFSGSGSGTDFTLR	gi|523391770	131.37	2012.96	3	671.99	20	-	-	0.967931	0.00975448	IGKV2-28*01	43.1	5e-10	FR3	95
ASGYTFTNYGLSWVR	gi|304562650	230.57	1720.82	2	861.41	15	+	-	0.0222702	0.679433	IGHV1-18*02	34.3	6e-07	CDR1	86.7
ASQNIDSWLAWYQQKPGK	gi|15722903	97.129	2119.05	2	1060.52	18	-	-	0.403915	0.251032	IGKV1-5*01	40	6e-09	CDR1	88.9
ASQSISNWLAWYQQKPGK	gi|315487930	77.726	2091.05	3	698.02	18	-	-	0.102598	0.416216	IGKV1-5*01	41.6	2e-09	CDR1	94.4
ASQSITSWLAWYQQKPGK	gi|33570601	124.5	2078.06	2	1040.03	18	-	-	0.502571	0.187685	IGKV1-5*01	41.6	2e-09	CDR1	94.4
ASQSLSSWLAWYQQKPGK	gi|323433041	198.61	2064.04	2	1033.02	18	-	-	0.247549	0.299308	IGKV1-5*01	42	1e-09	CDR1	94.4
ASQSLSSWLAWYQQKPGKAPK	gi|323433041	113.88	2360.23	3	787.74	21	+	+	0.00109534	1.16337	IGKV1-5*01	48.1	8e-12	CDR1	95.2
ASQSVGSNLAWYQQKPGQAPR	gi|630869019	166.67	2272.13	2	1137.07	21	+	+	0.000357363	1.54479	IGKV3-15*01	45.4	8e-11	CDR1	95.2
ASQSVNSNLAWYQQKPGQAPR	gi|87906	166.36	2329.16	2	1165.58	21	+	+	0.000754781	1.12916	IGKV3-15*01	45.8	6e-11	CDR1	95.2
ASQSVSNNYLAWYQQKPGQAPR	gi|585379713	111.01	2492.22	2	1247.11	22	-	-	0.352348	0.43927	IGKV3-20*02	46.6	3e-11	CDR1	90.9
ASQSVSSDLAWYQQKPGQAPR	gi|323432857	139.38	2303.13	2	1152.56	21	-	-	0.91424	0.0259436	IGKV3-15*01	45.1	1e-10	CDR1	95.2
ASQSVSSNLAWYQQK	gi|284521128	229.48	1695.82	2	848.91	15	-	-	0.0573869	0.416197	IGKV3-15*01	33.9	8e-07	CDR1	100
ASQSVSSNLAWYQQKPGQAPR	gi|284521128	210.43	2302.15	2	1152.07	21	+	-	0.0485416	0.557291	IGKV3-15*01	47	2e-11	CDR1	100
ASQSVSSNLAWYQQRPGQAPR	gi|237702286	79.393	2330.15	3	777.72	21	+	+	0.000508072	0.611574	IGKV3-15*01	45.8	6e-11	CDR1	95.2
ASQSVSSNYLAWYQQKPGQAPR	gi|190613407	164.02	2465.21	2	1233.6	22	+	-	0.0165566	0.68783	IGKV3-20*02	47.8	1e-11	CDR1	95.5
ASQSVSSSLAWYQQKPGQAPR	gi|323432554	166.67	2275.13	2	1138.57	21	+	+	0.00451794	1.01591	IGKV3-15*01	45.1	1e-10	CDR1	95.2
ASQSVSSSYLAWYQQKPGQAPR	gi|149673891	206.45	2438.2	2	1220.1	22	+	+	0.000708371	0.956413	IGKV3-20*02	48.9	4e-12	CDR1	100
ASQSVSSYLAWYQQK	gi|339272255	225.09	1744.84	2	873.42	15	+	+	0.000292204	0.813823	IGKV3-11*01	34.3	6e-07	CDR1	100
ASQSVSSYLAWYQQKPGQAPR	gi|339272255	240.34	2351.17	2	1176.58	21	+	+	0.0029161	0.742186	IGKV3-11*01	47.4	2e-11	CDR1	100
ASQSVSTNLAWYQQKPGQAPR	gi|1911733	133.86	2316.16	2	1159.08	21	-	-	0.254309	0.471518	IGKV3-15*01	45.8	6e-11	CDR1	95.2
ASSLEGGVPSR	gi|7438723	105.25	1058.54	2	530.27	11	+	+	0.00597476	0.749596	IGKV1-13*01	22.7	0.011	FR3	90.9
ASSLESGVPSR	gi|442828	178.71	1088.55	2	545.27	11	+	+	0.00544006	0.806415	IGKV1-13*01	24.3	0.003	FR3	100
ASTLESGVPSR	gi|662702284	153.54	1102.56	2	552.28	11	-	-	0.162069	0.403065	IGKV1-27*01	23.5	0.006	FR3	90.9
ASTLETGVPSR	gi|662563914	122.55	1116.58	2	559.29	11	-	-	0.328946	0.250814	IGKV1-33*01	23.1	0.008	FR3	90.9
ASTLQSGVPSR	gi|315487930	163.71	1101.58	2	551.79	11	-	-	0.30202	0.382216	IGKV1-27*01	24.6	0.002	FR3	100
ATGIPDRFR	gi|52630839	108.57	1031.55	2	516.78	9	+	+	0.00754161	0.654821	IGKV3-20*01	21.2	0.036	FR3	100
ATGIPDRFSGSGSGTDFTLTLSR	gi|70797863	158.99	2342.15	2	1172.08	23	+	+	1.47785e-06	1.36408	IGKV3-20*01	48.9	5e-12	FR3	95.7
AYELTQPPSVSVSPGQTAR	gi|821350558	178.71	1987	2	994.5	19	-	-	0.443172	0.204028	IGLV3-25*03	40.4	4e-09	FR1	94.7
DIQLTQSPSSLSASVGDR	gi|405945039	292.35	1859.92	2	930.96	18	-	-	0.835398	-0.050517	IGKV1-37*01	37.4	5e-08	FR1	100
DIQLTQSPSTLSASVGDR	gi|27531086	251.74	1873.94	2	937.97	18	+	+	0.00683817	0.633891	IGKV1-5*01	37	7e-08	FR1	94.4
DIQLTQSPSTVSASVGDR	gi|630868811	238.19	1859.92	2	930.96	18	-	-	0.157781	-0.80843	IGKV1-5*01	35.8	2e-07	FR1	88.9
DIQMNQSPSTLSASVGDR	gi|98956350	152.32	1904.89	2	953.44	18	-	-	0.195319	-0.302565	IGKV1-5*01	36.2	1e-07	FR1	94.4
DIQMTQSPSSVSASVGDR	gi|820957471	300.25	1863.86	2	932.93	18	+	+	0.000211755	1.823	IGKV1-12*01	37.7	4e-08	FR1	100
DIQMTQSPSTLSASVGDR	gi|442828	310.55	1891.89	2	946.95	18	+	+	0.00207451	1.51083	IGKV1-5*01	38.1	3e-08	FR1	100
DIQVTQSPSSLSASVGDR	gi|377656586	223.76	1845.91	2	923.95	18	-	-	0.255625	0.327536	IGKV1/OR2-108*01	37.4	5e-08	FR1	100
DIVLTQSPDSLAVSLGER	gi|13096223	248.7	1898.99	2	950.5	18	+	+	0.00199972	1.07533	IGKV4-1*01	36.6	1e-07	FR1	94.4
DIVLTQSPLSLPVTPGEPASISCR	gi|125786	148.2	2536.32	2	1269.16	24	-	-	0.867348	0.0476681	IGKV2-28*01	50.8	1e-12	FR1	95.8
DIVMTQSPDSLAVSLGER	gi|335892418	295.16	1916.95	2	959.48	18	+	+	0.000359136	1.79651	IGKV4-1*01	37.7	4e-08	FR1	100
DIVMTQSPLSLPVTPGEPASISCR	gi|218783338	221.99	2554.28	2	1278.14	24	+	+	0.0228282	0.963685	IGKV2-28*01	52	4e-13	FR1	100
DIVVTQSPDSLAVSPGER	gi|170684480	116.86	1868.95	2	935.47	18	-	-	0.265902	0.406702	IGKV4-1*01	33.5	1e-06	FR1	88.9
DLQMTQSPSSLSASVGDR	gi|327410291	267.69	1877.88	2	939.94	18	+	+	3.09438e-05	1.68378	IGKV1-27*01	37	7e-08	FR1	94.4
DSGVPDRFSGSGSGTDFTLK	gi|21669411	190.37	2028.94	2	1015.47	20	-	-	0.105854	0.631499	IGKV2-30*01	45.1	1e-10	FR3	100
DVQLVQSGAEVK	gi|821350640	185.2	1271.67	2	636.84	12	+	+	0.00263406	0.773129	IGHV1-69-2*01	24.6	0.002	FR1	91.7
DVWGQGTTVTVSSASTK	gi|342731405	225.17	1722.84	2	862.42	17	+	-	0.0342938	0.409035	IGHJ6*01	31.2	6e-08	FR4	100
EEQLVQSGAEVK	gi|484718	219.89	1315.66	2	658.83	12	-	-	0.332643	0.336816	IGHV1/OR15-4*01	23.9	0.005	FR1	100
EGQLVESGGGLVQPGGSLR	gi|630868550	161.08	1838.95	2	920.47	19	-	-	0.383894	0.23449	IGHV3-47*01	38.9	2e-08	FR1	94.7
EGQLVESGGGLVQPGR	gi|171853445	188.9	1581.81	2	791.91	16	-	-	0.31334	0.392491	IGHV3-9*01	32.7	2e-06	FR1	93.8
EIQMTQSPDSLAVSLGER	gi|440919790	217.67	1959.96	2	980.98	18	-	-	0.788801	-0.0556957	IGKV4-1*01	33.9	1e-06	FR1	88.9
EIVLTQSPDFQSVTPK	gi|924443593	228.76	1787.93	2	894.97	16	-	-	0.813785	0.0614057	IGKV6-21*01	35.4	2e-07	FR1	100
EIVLTQSPGILSLSPGER	gi|21669113	242.09	1895.04	2	948.52	18	-	-	0.501377	-0.169038	IGKV3-20*01	36.2	1e-07	FR1	94.4
EIVLTQSPGTLSLSPGEGATLSCR	gi|630869151	206.92	2472.25	2	1237.13	24	-	-	0.416756	0.181302	IGKV3-20*01	47.8	1e-11	FR1	95.8
EIVLTQSPSFLSASVGDR	gi|316925577	45.614	1904.98	3	635.99	18	-	-	0.0830713	0.220452	IGKV1-9*01	33.9	9e-07	FR1	88.9
EIVLTQSPVTLSLSPGER	gi|18025670	218.64	1925.05	2	963.52	18	-	-	0.295822	0.248165	IGKV3-20*02	36.2	1e-07	FR1	94.4
ELVFTQSPATLSVSPGER	gi|339272251	112.91	1916.98	2	959.49	18	+	-	0.0312272	0.544235	IGKV3-15*01	35.4	2e-07	FR1	88.9
ELVLTQSPATLSLSPGER	gi|339272255	307.57	1897.02	2	949.51	18	+	+	0.000881041	0.657139	IGKV3-20*02	37	7e-08	FR1	94.4
ELVLTQSPGTLSLSPGER	gi|61970173	327.27	1883	2	942.5	18	+	+	0.0220533	1.15578	IGKV3-20*01	37.7	4e-08	FR1	94.4
ELVMTQSPATLSVSPGER	gi|37728242	281.65	1900.96	2	951.48	18	+	+	0.000953806	1.44577	IGKV3-15*01	37.4	5e-08	FR1	94.4
ENVLTQSPGTLSLSPGER	gi|630869153	227.09	1883.96	2	942.98	18	-	-	0.071351	0.320371	IGKV3-20*01	35.8	2e-07	FR1	94.4
ETVLTQSPGTLSLSPGER	gi|694269986	256.89	1870.96	2	936.48	18	-	-	0.198032	0.326048	IGKV3-20*01	36.6	1e-07	FR1	94.4
EVHLVESGGDLVQPGR	gi|519672204	107.74	1690.86	2	846.43	16	-	-	0.26471	0.171177	IGHV3-13*02	32	4e-06	FR1	93.3
EVHLVESGGGLVKPGGSLR	gi|519672968	209.19	1890.03	2	946.02	19	-	-	0.151637	0.512422	IGHV3-13*02	39.3	1e-08	FR1	89.5
EVHLVESGGGLVQPGGSLR	gi|247424344	264.01	1890	2	946	19	-	-	0.119947	0.373443	IGHV3-13*02	40.8	3e-09	FR1	94.7
EVHVLESGGGLVQPGGSLR	gi|519671982	165.24	1890	3	631	19	-	-	0.0678516	0.492671	IGHV3-13*02	38.5	2e-08	FR1	84.2
EVKLVESGGGLVQPGGSLR	gi|519672548	267.69	1881.03	2	941.52	19	-	-	0.641837	0.119711	IGHV3-13*01	39.3	1e-08	FR1	94.7
EVQLAESGGGLVQPGGSLR	gi|47846717	176.67	1852.96	2	927.48	19	-	-	0.807722	-0.12187	IGHV3-13*01	39.3	1e-08	FR1	94.7
EVQLAQSGAEVK	gi|58222313	194.3	1257.66	2	629.83	12	-	-	0.216495	0.574626	IGHV1-69-2*01	24.3	0.003	FR1	91.7
EVQLEESGGGLVQPGGSLR	gi|218454118	236.66	1910.97	2	956.48	19	-	-	0.348042	0.548939	IGHV3/OR16-14*01	41.2	2e-09	FR1	100
EVQLLESGGGLVQPGGSLR	gi|3152372	306.67	1895.01	2	948.51	19	-	-	0.702557	0.267473	IGHV3-23*01	40.8	3e-09	FR1	100
EVQLSESGGGFVKPGGSLR	gi|827343200	145.99	1902.98	2	952.49	19	-	-	0.597005	0.0862754	IGHV3-69-1*01	37	7e-08	FR1	89.5
EVQLVESGGDLVQPGGSLR	gi|247425900	254.39	1939	2	970.5	19	-	-	0.799629	-0.115417	IGHV3-13*01	38.1	3e-08	FR1	94.7
EVQLVESGGGLVKPGESLR	gi|662565223	261.06	1953.05	2	977.53	19	-	-	0.779354	0.100747	IGHV3-49*05	38.5	2e-08	FR1	94.7
EVQLVESGGGLVQPGGSLR	gi|576865225	329.54	1881	2	941.5	19	-	-	0.0996673	0.560194	IGHV3-13*01	40.8	3e-09	FR1	100
EVQLVESGGGLVQPGR	gi|757819140	248.81	1623.86	2	812.93	16	-	-	0.371519	0.281907	IGHV3-9*01	35.4	2e-07	FR1	100
EVQLVESGGNLVQPGGSLR	gi|33319656	228.65	1938.02	2	970.01	19	-	-	0.339221	-0.402845	IGHV3-13*01	38.5	2e-08	FR1	94.7
EVQLVESGGR	gi|371446881	180.66	1072.55	2	537.28	10	-	-	0.154949	0.476357	IGHV3-13*03	21.2	0.038	FR1	100
EVQLVQSGADVK	gi|910276554	195.71	1271.67	2	636.84	12	-	-	0.0684263	-0.752872	IGHV1-69-2*01	24.6	0.002	FR1	91.7
EVQLVQSGAEAK	gi|1685229	214.42	1257.66	2	629.83	12	-	-	0.326883	0.507774	IGHV1-69-2*01	24.3	0.003	FR1	91.7
EVQLVQSGAEVK	gi|761232722	301.35	1285.69	2	643.84	12	-	-	0.599603	0.316706	IGHV1-69-2*01	25.8	0.0008	FR1	100
EVQLVQSGAEVKKPGESLK	gi|761232722	241.98	2025.11	2	1013.56	19	+	-	0.0153067	0.490939	IGHV5-51*01	39.7	8e-09	FR1	100
EVQLVQSGAEVKKPGESLR	gi|118406453	277.07	2053.12	2	1027.56	19	-	-	0.236499	0.657888	IGHV5-10-1*01	39.7	8e-09	FR1	100
EVQLVQSGAEVR	gi|816457339	217.46	1313.69	2	657.85	12	-	-	0.178103	0.242783	IGHV1-69-2*01	24.6	0.002	FR1	91.7
EVQLVQSGGEVAK	gi|320042338	140.82	1342.71	2	672.35	13	-	-	0.0768953	-0.607326	IGHV1-69-2*01	23.9	0.005	FR1	84.6
EVQLVQSGGEVK	gi|340002497	169.58	1271.67	2	636.84	12	-	-	0.415406	-0.236264	IGHV1-69-2*01	24.3	0.003	FR1	91.7
EVQLVQSGPEVK	gi|118405995	201.09	1311.7	2	656.85	12	-	-	0.177236	0.509564	IGHV1-58*01	24.6	0.002	FR1	83.3
EVQLVQSGTEVK	gi|241913100	237.41	1315.7	2	658.85	12	-	-	0.0804708	0.547165	IGHV1-69-2*01	24.3	0.003	FR1	91.7
EVQLVQSGVEVK	gi|114147626	236.28	1313.72	2	657.86	12	+	+	0.0105986	1.00114	IGHV1-69-2*01	24.3	0.003	FR1	91.7
EVQLVQSR	gi|5305649	142.98	957.524	2	479.76	8	-	-	0.339905	0.305934	IGHV3-38-3*01	17.3	0.68	FR1	87.5
FDDTAVYYCAR	gi|524453973	149.96	1379.58	2	690.79	11	-	-	0.0683534	0.560804	IGHV1-18*01	26.6	0.0004	FR3	100
FDYWGQGTLVTVSSASTK	gi|304563214	197.84	1945.94	2	973.97	18	+	+	4.64827e-05	1.0524	IGHJ4*01	34.3	5e-09	CDR3	100
FILSRDDSK	gi|106897735	113.71	1079.56	2	540.78	9	-	-	0.294126	-0.257219	IGHV3-72*02	18.9	0.15	FR3	77.8
FLAWYQQK	gi|323432838	138.85	1082.55	2	542.28	8	+	-	0.0322796	0.521958	IGKV3-20*02	21.6	0.024	FR2	87.5
FLAWYQQKPGQAPR	gi|84798398	149.23	1688.88	2	845.44	14	-	-	0.164262	0.512827	IGKV3-20*02	34.7	4e-07	FR2	92.9
FSGGGSGTDFTLK	gi|323432738	156.52	1272.6	2	637.3	13	-	-	0.125395	0.436372	IGKV2-28*01	28.9	6e-05	FR3	92.3
FSGSGAGTDFTLK	gi|323433100	249.98	1286.61	2	644.31	13	+	+	0.00466546	0.614729	IGKV2-24*01	30.4	2e-05	FR3	100
FSGSGSATDFTLK	gi|33570516	162.31	1316.62	2	659.31	13	-	-	0.298483	0.417581	IGKV2-28*01	28.1	0.0001	FR3	92.3
FSGSGSGTDFLLTISR	gi|662563940	158.65	1643.82	2	822.91	16	-	-	0.204645	0.286563	IGKV3-20*02	33.1	2e-06	FR3	93.8
FSGSGSGTDFSLTISR	gi|323432885	204.23	1617.76	2	809.88	16	-	-	0.0766169	0.399961	IGKV3-20*02	33.9	8e-07	FR3	93.8
FSGSGSGTDFTLK	gi|218783338	246.51	1302.61	2	652.3	13	-	-	0.0957125	0.338474	IGKV2-28*01	30.4	2e-05	FR3	100
FSGSGSGTDFTLLISR	gi|80975645	167.18	1643.82	2	822.91	16	+	+	0.00388661	0.691623	IGKV3-20*02	33.1	2e-06	FR3	93.8
FSGSGSGTDFTLR	gi|523391770	158.86	1330.62	2	666.31	13	+	+	0.00357576	0.549808	IGKV2-28*01	29.3	4e-05	FR3	92.3
FSGSGSGTDFTLTINR	gi|149673891	210.02	1658.79	2	830.4	16	-	-	0.225132	0.271853	IGKV3-20*02	34.3	6e-07	FR3	94.1
FSGSGSGTDFTLTIR	gi|848130250	184	1544.75	2	773.37	15	-	-	0.157301	0.280969	IGKV3-20*02	32	4e-06	FR3	100
FSGSGSGTDFTLTISSLQAEDVAVYYCQQYYSTPPL	gi|15919681	95.445	3951.8	3	1318.27	36	+	+	0.000667487	1.29672	IGKV4-1*01	73.2	6e-21	CDR3	100
FSGSGSGTDFTLTLSR	gi|70797863	262.83	1631.78	2	816.89	16	+	-	0.0203424	0.43151	IGKV3-20*02	34.7	4e-07	FR3	93.8
FSGSIDSSSNSASLTISGLK	gi|914684748	237.66	1956.96	2	979.48	20	-	-	0.139814	0.511478	IGLV6-57*01	40	6e-09	FR3	100
FSGSILGNK	gi|2765427	161.27	921.492	2	461.75	9	-	-	0.181393	0.747922	IGLV8-61*03	21.9	0.016	FR3	100
FSGSNSGNTATLTINR	gi|21310507	216.01	1638.8	2	820.4	16	-	-	0.796713	-0.0858231	IGLV3-9*01	33.5	1e-06	FR3	93.8
FSGSNSGNTATLTITR	gi|54038910	192.23	1625.8	2	813.9	16	-	-	0.351735	0.25187	IGLV3-9*01	33.5	1e-06	FR3	93.8
FSGSNSGNTATLTLSR	gi|170684348	224.36	1611.79	2	806.89	16	-	-	0.381982	0.168362	IGLV3-9*01	33.9	8e-07	FR3	93.8
FSGVPDRFSGSGAGTDFTLK	gi|323433100	151.87	2044.99	2	1023.49	20	-	-	0.397432	0.283183	IGKV2-24*01	45.1	1e-10	FR3	100
FTFGPGTK	gi|21669299	110.41	853.433	2	427.72	8	+	-	0.0189434	0.746271	IGKJ3*01	22.3	7e-05	CDR3	100
FTISRDDAK	gi|11275324	123.86	1051.53	2	526.76	9	-	-	0.202335	0.35123	IGHV3-72*02	20.8	0.026	FR3	88.9
FTLSRDDSK	gi|371447147	134.23	1067.52	2	534.76	9	-	-	0.900022	-0.0388623	IGHV3-72*02	21.2	0.019	FR3	88.9
FTNYWIGWVR	gi|695942644	172.56	1340.67	2	671.33	10	-	-	0.203811	0.29023	IGHV5-51*05	27.7	0.0001	CDR1	90
FVSWYQQHPGK	gi|170684424	92.538	1375.67	2	688.83	11	-	-	0.120188	0.330178	IGLV2-11*03	29.6	2e-05	FR2	90.9
GALVTVSSASTK	gi|12750766	136.27	1119.61	2	560.81	12	-	-	0.806199	0.076593	IGHJ1*01	16.5	0.005	FR4	87.5
GILVTVSSASTK	gi|226427206	140.14	1161.66	2	581.83	12	-	-	0.35654	0.26896	IGHJ1*01	16.2	0.007	FR4	87.5
GLEWLGR	gi|594147073	158.38	829.445	2	415.72	7	-	-	0.103844	0.442795	IGHV6-1*01	20.4	0.063	FR2	100
GLEWMGLIYPGDSDTR	gi|106897261	163.8	1808.84	2	905.42	16	+	+	0.00769916	0.908963	IGHV5-51*05	38.9	1e-08	CDR2	93.8
GLEWVANLK	gi|630868332	177.36	1028.57	2	515.28	9	+	+	0.00268567	0.680988	IGHV3-7*01	22.7	0.01	FR2	88.9
GLEWVAR	gi|442922	151.17	829.445	2	415.72	7	-	-	0.673191	0.117213	IGHV3-72*02	18.1	0.25	FR2	85.7
GLEWVGFLR	gi|371448288	169.12	1075.58	2	538.79	9	-	-	0.0637969	0.474308	IGHV3-22*01	23.5	0.006	FR2	88.9
GLEWVGLIK	gi|323431658	183.65	1013.59	2	507.8	9	-	-	0.278152	0.254632	IGHV3-15*08	21.6	0.027	FR2	88.9
GLEWVGR	gi|158259769	158.38	815.429	2	408.71	7	+	+	0.00307993	0.557792	IGHV3-72*02	20.4	0.033	FR2	100
GLEWVSR	gi|345110944	113.89	845.44	2	423.72	7	+	-	0.0205803	0.477411	IGHV3-72*02	18.1	0.25	FR2	85.7
GLEWVSSISR	gi|63022996	164.64	1132.59	2	567.29	10	+	+	0.00212054	0.782896	IGHV3-38-3*01	22.3	0.015	FR2	100
GLEWVSSISSR	gi|662565320	120.57	1219.62	2	610.81	11	+	+	0.00198057	0.763996	IGHV3-69-1*01	23.9	0.004	CDR2	100
GLEWVSYLSR	gi|371446921	139.86	1208.62	2	605.31	10	+	-	0.0379408	0.69149	IGHV3-11*01	22.7	0.011	FR2	88.9
GLVWVSR	gi|2765421	113.7	815.465	2	408.73	7	+	-	0.0366039	0.526302	IGHV3-74*01	19.2	0.15	FR2	100
GQGTLVTVSSASTK	gi|86438980	169.98	1334.7	2	668.35	14	-	-	0.530662	-0.201966	IGHJ1*01	22.7	6e-05	FR4	100
GRFLISR	gi|432139057	129.68	847.503	2	424.75	7	-	-	0.740473	0.0509409	IGHV3-19*01	16.9	0.86	FR3	85.7
GSGSGTDFTLK	gi|98956380	117.25	1068.51	2	535.25	11	-	-	0.259376	0.407509	IGKV2-28*01	26.6	0.0004	FR3	100
GSGSGTDFTLTISR	gi|58223284	164.92	1397.68	2	699.84	14	-	-	0.0502149	0.445597	IGKV3-20*02	31.6	5e-06	FR3	100
GSGSGTDFTLTITR	gi|52630839	110.25	1411.69	2	706.85	14	-	-	0.98224	0.0061215	IGKV3-20*02	30.4	1e-05	FR3	92.9
GTLVIVSSASTK	gi|194376338	168.02	1161.66	2	581.83	12	-	-	0.665924	0.117579	IGHJ1*01	16.2	0.007	FR4	87.5
GTLVSVSSASTK	gi|304562033	148.13	1135.61	2	568.8	12	-	-	0.420571	0.235965	IGHJ1*01	16.9	0.004	FR4	87.5
GTLVTVSPASTK	gi|42543654	147.33	1159.64	2	580.82	12	-	-	0.209278	0.480023	IGHJ1*01	16.9	0.004	FR4	100
GTLVTVSSASTK	gi|34532520	173.72	1149.62	2	575.81	12	+	+	0.00120351	0.469132	IGHJ1*01	18.5	0.001	FR4	100
GTLVTVSTASTK	gi|21752551	119.39	1163.64	2	582.82	12	-	-	0.839657	0.0756769	IGHJ1*01	17.3	0.003	FR4	87.5
GTTVIVSSASTK	gi|15825648	138.42	1149.62	2	575.81	12	-	-	0.497234	0.433637	IGHJ6*01	16.5	0.005	FR4	87.5
GTTVTVSSASTK	gi|538261346	173.76	1137.59	2	569.79	12	-	-	0.542226	0.441555	IGHJ6*01	18.9	0.0009	FR4	100
GVQLVQSGAEVK	gi|23194495	158.11	1213.67	2	607.83	12	-	-	0.301159	0.334662	IGHV1-69*03	23.9	0.004	FR1	100
GYLAWYQQK	gi|125807	122.18	1155.57	2	578.79	9	-	-	0.552808	-0.15877	IGKV3-20*02	23.1	0.007	FR2	100
HLAWYQQKPGQAPR	gi|17483730	165.35	1678.87	2	840.43	14	-	-	0.772839	-0.149394	IGKV3-20*02	34.3	5e-07	FR2	92.9
INSDGSSTSYADSVK	gi|158714463	91.592	1529.68	2	765.84	15	+	+	0.0202746	0.926064	IGHV3-74*01	32.7	2e-06	CDR2	100
ITCSGDVLAK	gi|465176	98.048	1062.54	2	532.27	10	-	-	0.860935	0.0462591	IGLV3-27*01	24.3	0.003	CDR1	100
LAWYQHKPGQAPR	gi|662564289	119.74	1550.81	2	776.41	13	-	-	0.165761	0.497293	IGKV3-20*02	31.6	5e-06	FR2	92.3
LAWYQQK	gi|160286048	143.97	935.486	2	468.74	7	+	+	0.00524763	0.633512	IGKV3-20*02	20.4	0.059	FR2	100
LAWYQQKPGQAPR	gi|75707409	190.26	1541.81	2	771.91	13	+	-	0.0185859	0.472411	IGKV3-20*02	33.5	1e-06	FR2	100
LAWYQQR	gi|728055269	132.72	963.493	2	482.75	7	-	-	0.0699671	0.367279	IGKV3-20*02	19.2	0.15	FR2	85.7
LEPEDFAVYYCQQYGR	gi|4323191	162.7	2036.89	2	1019.45	16	-	-	0.18504	0.342456	IGKV3-20*01	38.1	3e-08	CDR3	100
LEPEDFAVYYCQQYGSSPR	gi|817599137	189.44	2308.01	2	1155.01	19	-	-	0.385357	0.181078	IGKV3-20*01	43.9	3e-10	CDR3	100
LIYGATSLQSGVPSR	gi|125774	143.93	1547.83	2	774.92	15	-	-	0.530097	0.155114	IGKV1-12*02	28.9	6e-05	CDR2	86.7
LLFYGASTR	gi|585379770	130.66	1026.55	2	514.27	9	-	-	0.799149	0.0786474	IGKV3-15*01	19.6	0.12	CDR2	88.9
LLFYWASTR	gi|70798891	152.06	1155.61	2	578.8	9	-	-	0.146129	0.311634	IGKV4-1*01	21.6	0.028	CDR2	88.9
LLIFDASNR	gi|831182953	183.43	1047.57	2	524.79	9	-	-	0.66393	0.113091	IGKV3-11*01	20	0.091	CDR2	88.9
LLIFDASTR	gi|1245381	157.34	1034.58	2	518.29	9	-	-	0.602538	0.152309	IGKV3D-20*01	18.1	0.4	CDR2	77.8
LLIFGASNR	gi|316925581	177.7	989.566	2	495.78	9	-	-	0.237725	0.32808	IGKV3-20*02	18.1	0.39	CDR2	77.8
LLIFGASSR	gi|77379440	160.59	962.555	2	482.28	9	-	-	0.222816	0.243263	IGKV3-20*02	19.2	0.16	CDR2	88.9
LLIFGASTR	gi|831182939	171.99	976.571	2	489.29	9	-	-	0.793586	0.0567201	IGKV3-15*01	19.6	0.12	CDR2	88.9
LLIHAASSR	gi|353254560	124.98	966.561	2	484.28	9	-	-	0.354904	0.272036	IGKV3-20*02	16.5	1.2	CDR2	77.8
LLIHGASNR	gi|695942622	89.698	979.556	2	490.78	9	-	-	0.2212	0.469586	IGKV3-20*02	17.7	0.52	CDR2	77.8
LLINDASNR	gi|11275314	99.788	1014.55	2	508.27	9	-	-	0.139219	0.236225	IGKV3-11*01	18.1	0.4	CDR2	88.9
LLISGASNR	gi|550545391	112.11	929.529	2	465.76	9	-	-	0.740308	0.0866617	IGKV3-20*02	16.2	1.6	CDR2	77.8
LLISGASSR	gi|585379713	114.4	902.519	2	452.26	9	-	-	0.0872489	0.370657	IGKV3-20*02	17.3	0.7	CDR2	88.9
LLISGASTR	gi|567160	123.75	916.534	2	459.27	9	-	-	0.885873	0.0314454	IGKV3-15*01	17.7	0.53	CDR2	88.9
LLISWASTR	gi|453071218	200.6	1045.59	2	523.8	9	+	-	0.0419491	0.471686	IGKV4-1*01	19.6	0.13	CDR2	88.9
LLIYAASNR	gi|910277170	191.17	1019.58	2	510.79	9	-	-	0.0773154	0.440389	IGKV3-11*01	18.5	0.3	CDR2	88.9
LLIYAASSLHSGVPSR	gi|300498362	135.94	1669.92	2	835.96	16	-	-	0.180389	0.550015	IGKV1-12*01	31.2	8e-06	CDR2	93.8
LLIYAASTR	gi|3721651	158.87	1006.58	2	504.29	9	+	-	0.0061162	0.469611	IGKV3-15*01	18.9	0.22	CDR2	88.9
LLIYDASDR	gi|630869089	147.4	1064.55	2	533.28	9	+	-	0.0366823	0.71159	IGKV3-11*01	19.6	0.12	CDR2	88.9
LLIYDASIR	gi|109693121	148.94	1062.61	2	532.3	9	-	-	0.846917	0.0463087	IGKV3D-20*01	18.5	0.3	CDR2	88.9
LLIYDASNLETGVPSR	gi|170684606	241.66	1746.92	2	874.46	16	-	-	0.179714	0.326316	IGKV1-33*01	35	3e-07	CDR2	100
LLIYDASNLK	gi|29836830	141.88	1148.64	2	575.32	10	-	-	0.344263	0.396756	IGKV1-33*01	21.6	0.028	CDR2	90
LLIYDASNLQTGVPSR	gi|14268412	183.36	1745.93	2	873.97	16	+	-	0.0209514	0.626659	IGKV1-33*01	33.9	8e-07	CDR2	93.8
LLIYDASTLETGVPSR	gi|148540958	183.23	1733.92	2	867.96	16	-	-	0.214084	0.345404	IGKV1-33*01	32.7	2e-06	CDR2	93.8
LLIYDASTLQSGVPSR	gi|700652714	171.26	1718.92	2	860.46	16	-	-	0.48342	0.227025	IGKV1-13*01	31.6	6e-06	CDR2	87.5
LLIYDASYR	gi|4323958	138.08	1112.59	2	557.29	9	-	-	0.220356	0.380416	IGKV3-11*01	18.5	0.3	CDR2	88.9
LLIYDNNK	gi|347447255	128.57	991.534	2	496.77	8	-	-	0.115889	0.518538	IGLV1-51*01	20.8	0.048	CDR2	100
LLIYDSSNR	gi|440919806	126.07	1079.56	2	540.78	9	+	-	0.0336113	0.575983	IGKV3-11*01	20.4	0.067	CDR2	88.9
LLIYDSSSR	gi|190613407	114.86	1052.55	2	527.28	9	-	-	0.788653	-0.0891914	IGKV3D-20*01	19.6	0.12	CDR2	88.9
LLIYDTSNR	gi|27728685	182.76	1093.58	2	547.79	9	+	-	0.00791594	0.524897	IGKV3-11*01	20	0.091	CDR2	88.9
LLIYDTSTR	gi|3603397	99.013	1080.58	2	541.29	9	-	-	0.257756	0.296183	IGKV3D-20*01	18.1	0.4	CDR2	77.8
LLIYEASNR	gi|33569955	155.42	1077.58	2	539.79	9	-	-	0.177447	0.308142	IGKV3-11*01	20	0.091	CDR2	88.9
LLIYEVNK	gi|70888072	116.25	990.575	2	496.29	8	-	-	0.182851	0.518952	IGLV2-33*01	15.8	2	CDR2	85.7
LLIYEVSK	gi|882264	95.358	963.564	2	482.78	8	+	+	0.0106962	0.848006	IGLV2-8*03	18.1	0.37	CDR2	87.5
LLIYGAFTR	gi|662564699	143.37	1052.6	2	527.3	9	-	-	0.103995	0.481746	IGKV3-15*01	18.9	0.22	CDR2	88.9
LLIYGASIR	gi|323432379	128.36	1004.6	2	503.3	9	-	-	0.0529793	0.447452	IGKV3D-15*03	20.8	0.049	CDR2	100
LLIYGASTLQSGVPSR	gi|910277166	193.32	1660.91	2	831.46	16	-	-	0.0959556	0.54176	IGKV1-27*01	32	4e-06	CDR2	93.8
LLIYGATSR	gi|125799	140.11	992.565	2	497.28	9	-	-	0.736026	0.176611	IGKV3-20*02	19.6	0.12	CDR2	88.9
LLIYGGSSR	gi|58223274	91.867	964.534	2	483.27	9	-	-	0.95443	-0.0128088	IGKV3-20*02	19.2	0.16	CDR2	88.9
LLIYGNNNRPSGVPDR	gi|587358	98.654	1783.93	2	892.97	16	-	-	0.144732	0.455802	IGLV1-40*01	36.2	1e-07	CDR2	93.8
LLIYGSSSR	gi|353254886	109.44	994.545	2	498.27	9	-	-	0.404255	0.314232	IGKV3-20*02	19.6	0.12	CDR2	88.9
LLIYGVSNR	gi|906849197	169.09	1033.59	2	517.8	9	-	-	0.328574	0.332362	IGLV1-40*01	18.9	0.23	CDR2	88.9
LLIYGVSSR	gi|21619606	148.52	1006.58	2	504.29	9	-	-	0.226055	0.325345	IGKV3-20*02	19.2	0.16	CDR2	88.9
LLIYGVSTR	gi|51103413	143.03	1020.6	2	511.3	9	-	-	0.279651	0.328226	IGKV3-15*01	19.6	0.12	CDR2	88.9
LLIYLGSNR	gi|185840	164.68	1047.61	2	524.8	9	-	-	0.90058	0.0396881	IGKV2-28*01	21.6	0.027	CDR2	100
LLIYQISNR	gi|696826020	179.81	1118.64	2	560.32	9	+	-	0.0333514	0.93495	IGKV2-24*01	19.6	0.13	CDR2	88.9
LLIYSGNQRPSGVPDR	gi|170684478	95.854	1770.94	2	886.47	16	-	-	0.543139	0.186307	IGLV1-44*01	34.7	4e-07	CDR2	93.8
LLIYSNNQR	gi|62205367	126.24	1119.6	2	560.8	9	+	-	0.0119799	0.517485	IGLV1-44*01	21.9	0.02	CDR2	100
LLIYSNNQRPSGVPDR	gi|62205367	103.14	1827.96	2	914.98	16	+	+	0.00671832	0.855631	IGLV1-44*01	37	7e-08	CDR2	100
LLIYVASTR	gi|353254430	113.62	1034.61	2	518.31	9	-	-	0.250902	0.465143	IGKV3-15*01	17.7	0.53	CDR2	88.9
LLIYWASAR	gi|67464527	143.7	1091.61	2	546.81	9	+	-	0.0429168	0.541978	IGKV4-1*01	21.2	0.038	CDR2	88.9
LLIYWASSR	gi|77379421	153.24	1107.61	2	554.8	9	-	-	0.061012	0.568944	IGKV4-1*01	21.6	0.028	CDR2	88.9
LLIYYDDLLPSGVSDR	gi|594147074	159.4	1837.95	2	919.97	16	-	-	0.697563	-0.167144	IGLV1-36*01	36.2	1e-07	CDR2	100
LLLYAASR	gi|21669475	136.8	905.533	2	453.77	8	-	-	0.140413	0.404888	IGKV1-NL1*01	18.5	0.29	CDR2	100
LLLYAASSR	gi|58223192	152.11	992.565	2	497.28	9	-	-	0.131385	0.204211	IGKV3-20*02	17.7	0.52	CDR2	77.8
LLLYDASNR	gi|47154910	213.53	1063.57	2	532.78	9	-	-	0.0810112	0.45304	IGKV3-11*01	20.8	0.049	CDR2	88.9
LLLYDASSR	gi|353255354	176.38	1036.56	2	519.28	9	-	-	0.318566	0.310607	IGKV3D-20*01	20	0.091	CDR2	88.9
LLLYDASTR	gi|109240706	190.02	1050.57	2	526.29	9	-	-	0.329215	0.221483	IGKV3D-20*01	18.9	0.22	CDR2	77.8
LLLYDVSNR	gi|722434	172.59	1091.6	2	546.8	9	-	-	0.3063	0.355646	IGLV2-14*03	20	0.088	CDR2	77.8
LLLYGASNR	gi|4324002	159.58	1005.56	2	503.78	9	-	-	0.925813	0.0145788	IGKV3-20*02	18.9	0.22	CDR2	77.8
LLLYGASR	gi|524453553	124.98	891.518	2	446.76	8	+	-	0.0129713	0.499698	IGKV1-NL1*01	16.9	0.9	CDR2	87.5
LLLYGASSR	gi|47271294	164.68	978.55	2	490.27	9	+	-	0.00543807	0.428584	IGKV3-20*02	20	0.088	CDR2	88.9
LLLYGASTR	gi|18041788	128.6	992.565	2	497.28	9	-	-	0.336679	0.508507	IGKV3-15*01	20.4	0.067	CDR2	88.9
LLLYGTSNR	gi|197115433	186.41	1035.57	2	518.79	9	+	-	0.0376927	0.521417	IGLV1-40*01	19.2	0.17	CDR2	77.8
LLLYWASTR	gi|323432988	233.57	1121.62	2	561.81	9	+	+	0.00102149	0.60793	IGKV4-1*01	22.3	0.015	CDR2	88.9
LLVYGASSR	gi|33569858	128.6	964.534	2	483.27	9	-	-	0.201432	0.385783	IGKV3-20*02	20.4	0.065	CDR2	88.9
LLVYGASTR	gi|40647132	97.431	978.55	2	490.27	9	-	-	0.620256	0.121384	IGKV3-15*01	20.8	0.049	CDR2	88.9
LNSVTAADTAVYYCAR	gi|223673814	205.33	1773.84	2	887.92	16	-	-	0.675712	0.0841014	IGHV4-34*13	34.3	6e-07	FR3	93.8
LQESGPGLVK	gi|21757093	107.55	1026.57	2	514.29	10	+	-	0.0371159	0.6205	IGHV4-4*03	23.9	0.004	FR1	100
LSCAASGFK	gi|5051246	87.806	939.448	2	470.72	9	-	-	0.757411	-0.102689	IGHV3-38-3*01	20.4	0.067	FR1	100
LSCAASGFNFR	gi|371446184	97.779	1228.57	2	615.28	11	-	-	0.493611	-0.140429	IGHV3-13*01	22.7	0.011	CDR1	90
LSCAASGFTFK	gi|519673494	116.74	1187.56	2	594.78	11	-	-	0.218529	0.38037	IGHV3-13*01	24.6	0.002	CDR1	100
LSCAASGFTFR	gi|34365282	158.06	1215.57	2	608.79	11	-	-	0.745254	0.0556842	IGHV3-13*01	24.6	0.002	CDR1	100
LSCAASGFTFSR	gi|21758945	145.81	1302.6	2	652.3	12	-	-	0.38327	-0.215617	IGHV3-13*01	26.2	0.0006	CDR1	100
LSGSGSGTDFTLK	gi|7650465	141.54	1268.62	2	635.31	13	-	-	0.151144	0.361299	IGKV2-28*01	28.1	0.0001	FR3	100
LSGSNSGNTATLTISR	gi|695942757	182.57	1577.8	2	789.9	16	-	-	0.339382	0.242116	IGLV3-9*01	32.3	3e-06	FR3	100
LTSVTAADTAVYYCAR	gi|34535785	226.88	1760.84	2	881.42	16	-	-	0.277232	0.214875	IGHV4-34*13	34.3	6e-07	FR3	93.8
LVESGGDLVQPGGSLR	gi|34527460	190.18	1582.83	2	792.42	16	-	-	0.757146	-0.154739	IGHV3-13*01	32.7	2e-06	FR1	93.8
LVESGGGLIQPGGSLR	gi|612407085	211.45	1538.84	2	770.42	16	-	-	0.699199	0.233716	IGHV3-53*01	35.4	2e-07	FR1	100
LVESGGGLVKPGGSLR	gi|323433102	148.7	1524.86	2	763.43	16	+	+	0.0116585	0.716458	IGHV3-69-1*01	35.4	2e-07	FR1	100
LVESGGGLVQPGR	gi|435979	162.93	1267.69	2	634.84	13	-	-	0.288993	0.383878	IGHV3-9*01	30	2e-05	FR1	100
LVESGGGVVQPGGSLR	gi|37694551	177.66	1510.81	2	756.41	16	-	-	0.0759112	0.771984	IGHV3-30*02	35.4	2e-07	FR1	100
LVESGGGVVQPGK	gi|197115708	109.16	1225.67	2	613.83	13	-	-	0.894236	-0.0635981	IGHV3-30*14	28.9	6e-05	FR1	92.3
LVESGGGVVQPGR	gi|435985	166.24	1253.67	2	627.84	13	-	-	0.65217	-0.120569	IGHV3-30*14	30	2e-05	FR1	100
LVLTQSPATLSLSPGER	gi|15277620	192.24	1767.97	2	884.99	17	-	-	0.925179	-0.019062	IGKV3-20*02	35	3e-07	FR1	94.1
LVLTQSPGTLSLSPGER	gi|2599536	238.05	1753.96	2	877.98	17	+	-	0.0206081	0.602814	IGKV3-20*01	35.8	2e-07	FR1	94.1
LVQLVESGAEVK	gi|323430702	85.672	1270.71	2	636.36	12	-	-	0.0654477	0.499694	IGHV1-69*03	22.7	0.011	FR1	90.9
LVQPGGSLR	gi|4426783	87.258	925.535	2	463.77	9	-	-	0.751055	0.0873871	IGHV3-38-3*01	21.9	0.019	FR1	100
NDLGWYQQK	gi|152149150	122.94	1150.54	2	576.27	9	+	+	0.00240477	0.726589	IGKV1-17*01	25.8	0.0007	FR2	100
NDLGWYQQKPGK	gi|152149150	193.62	1432.71	2	717.35	12	+	+	0.00124688	0.72195	IGKV1-17*01	32.7	2e-06	FR2	100
NDLGWYQQKPGKAPK	gi|152149150	123.95	1728.89	2	865.45	15	+	-	0.018842	0.725423	IGKV1-17*01	38.9	1e-08	FR2	100
NEDTAIYYCAR	gi|8699279	90.05	1374.59	2	688.29	11	+	+	0.0165427	-0.856005	IGHV1-69*06	26.2	0.0006	FR3	81.8
NGYLAWYQQK	gi|695942258	158.76	1269.61	2	635.81	10	+	+	0.00411824	-0.761545	IGKV3-20*02	23.5	0.005	CDR1	80
NIQMTQSPSSLSASVGDR	gi|444737639	192.22	1876.89	2	939.45	18	+	+	0.0021171	1.17031	IGKV1-33*01	35.8	2e-07	FR1	94.4
NLAWYQQKPGQAPR	gi|453071220	228.12	1655.85	2	828.93	14	-	-	0.119145	0.322286	IGKV3-15*01	35.8	2e-07	FR2	100
NQFSLK	gi|284521128	132.72	735.392	2	368.7	6	+	+	0.00268646	0.965982	IGHV4-39*04	16.2	1.2	FR3	100
NSLFLQMNSLR	gi|270047628	198.55	1321.68	2	661.84	11	+	-	0.0449446	0.702491	IGHV3-13*01	23.9	0.004	FR3	90.9
NSLVLQMNSLR	gi|304562407	93.839	1273.68	2	637.84	11	-	-	0.277386	0.267651	IGHV3-13*01	22.3	0.016	FR3	90.9
NSLYLQLNSLR	gi|33318950	188.15	1319.72	2	660.86	11	-	-	0.0500107	0.411011	IGHV3-13*01	24.3	0.003	FR3	90.9
NSLYLQMNNLR	gi|695942270	169.99	1364.69	2	683.34	11	+	-	0.0302374	0.499915	IGHV3-38*01	25	0.002	FR3	90.9
NSLYLQMNSLR	gi|209402818	303.71	1337.68	2	669.84	11	+	+	1.04179e-06	1.97736	IGHV3-13*01	25.4	0.001	FR3	100
NTLYLQMN	gi|630868188	172.15	995.475	1	996.47	8	+	+	0.00152414	1.31283	IGHV3-38*01	20.8	0.048	FR3	100
NVHWYQQK	gi|21669667	125.25	1101.54	2	551.77	8	-	-	0.0866825	0.465684	IGLV3-9*01	24.3	0.003	FR2	100
NWFDPWGQGTLVTVSSASTK	gi|30407984	234.22	2180.05	2	1091.03	20	+	-	0.0496217	0.380694	IGHJ5*02	40.8	2e-11	CDR3	100
NYLAWYQQK	gi|335892418	225.4	1212.59	2	607.3	9	-	-	0.72191	0.100199	IGKV1-27*01	25.4	0.001	FR2	100
NYLAWYQQKPGQPPK	gi|335892418	179.67	1816.93	2	909.46	15	+	-	0.0183976	0.553708	IGKV4-1*01	39.7	7e-09	FR2	100
NYLAWYQQR	gi|170684466	183.65	1240.6	2	621.3	9	-	-	0.205103	0.315308	IGKV1-27*01	24.3	0.003	FR2	88.9
NYLNWYQQK	gi|268612339	182.53	1255.6	2	628.8	9	-	-	0.860439	-0.0588227	IGKV1-33*01	26.2	0.0005	FR2	100
NYLNWYQQKPGK	gi|268612339	187.42	1537.77	2	769.88	12	-	-	0.808873	-0.115927	IGKV1-33*01	33.1	1e-06	FR2	100
NYLSWYQQKPGQPPK	gi|58223246	115.06	1832.92	2	917.46	15	-	-	0.172119	0.413981	IGKV4-1*01	38.5	2e-08	FR2	93.3
PGQAPVLIVYR	gi|17226628	92.611	1211.7	2	606.85	11	-	-	0.11681	0.549566	IGLV3-9*01	25.8	0.0008	FR2	81.8
PGQSPQLLIYLGSNR	gi|218783338	182.37	1641.88	2	821.94	15	-	-	0.330844	0.274148	IGKV2-28*01	34.7	4e-07	CDR2	100
PVQLVESGGGVVQPGGSLR	gi|114147582	139.46	1834.99	2	918.5	19	-	-	0.410322	0.34917	IGHV3-30*02	38.9	2e-08	FR1	100
QAPGKGLEWVGR	gi|158259769	89.189	1296.69	2	649.35	12	+	+	0.00444528	-1.74465	IGHV3-72*02	30.8	8e-06	FR2	100
QAPGQGLEWLGR	gi|550545390	89.189	1310.67	2	656.34	12	-	-	0.570333	0.235027	IGHV1-69*07	30	1e-05	FR2	91.7
QIVMTQSPGTLSVSPGER	gi|700652630	130.27	1885.96	2	943.98	18	-	-	0.702204	-0.121873	IGKV3-15*01	35.4	2e-07	FR1	88.9
QLVQSGAEVK	gi|323430773	91.549	1057.58	2	529.79	10	+	-	0.0146604	0.501081	IGHV1-69*03	22.3	0.014	FR1	100
QPQLVESGGGLVKPGGSLR	gi|519673618	202.81	1878.03	2	940.02	19	-	-	0.324013	-0.237486	IGHV3-11*01	38.5	2e-08	FR1	94.7
QSPATLSLSPGER	gi|4378272	83.869	1341.69	2	671.84	13	-	-	0.72199	-0.081914	IGKV3-20*02	29.3	4e-05	FR1	100
QSPGTLSLSPGER	gi|70797863	98.942	1327.67	2	664.84	13	+	+	0.0121996	0.711162	IGKV3-20*01	30	2e-05	FR1	100
QVELVESGGGLVK	gi|371446908	255.08	1313.72	2	657.86	13	+	+	0.00330104	1.29267	IGHV3-11*01	27.3	0.0002	FR1	92.3
QVELVESGGGLVQPGGSLR	gi|914685197	305.83	1881	2	941.5	19	-	-	0.0857934	-1.01773	IGHV3-64*04	39.7	8e-09	FR1	94.7
QVELVQSGAEVK	gi|407943831	314.35	1285.69	2	643.84	12	+	+	0.00373458	0.789141	IGHV1-69*03	24.6	0.002	FR1	91.7
QVELVQSGAEVKK	gi|407943831	164.92	1413.78	2	707.89	13	+	-	0.0498317	0.49041	IGHV1-69*03	26.6	0.0004	FR1	92.3
QYAYWYQQK	gi|21669565	111.95	1276.59	2	639.29	9	-	-	0.0993693	0.405306	IGLV3-25*03	26.2	0.0005	FR2	100
RLIYQVSNR	gi|70798763	128.03	1147.65	2	574.82	9	-	-	0.306937	0.441752	IGKV2-30*01	20	0.093	CDR2	88.9
SDDTALYYCAR	gi|14289050	177.57	1333.56	2	667.78	11	-	-	0.324127	0.258669	IGHV1-18*01	26.9	0.0003	FR3	90.9
SDDTAVYFCAR	gi|194376338	96.171	1303.55	2	652.78	11	+	-	0.0466356	0.615133	IGHV1-18*01	26.6	0.0004	FR3	90.9
SDDTAVYYCAR	gi|480312173	161.67	1319.55	2	660.77	11	+	-	0.0116739	0.499681	IGHV1-18*01	28.1	0.0001	FR3	100
SDDTAVYYCARGYR	gi|815095215	120.55	1695.73	2	848.87	14	+	+	0.00156727	0.854837	IGHV1-18*01	28.1	0.0001	FR3	100
SEDTAVYFCAR	gi|34526066	162.38	1317.57	2	659.78	11	-	-	0.0948202	0.351678	IGHV1-69*05	26.2	0.0006	FR3	90.9
SGNTATLTISR	gi|27728687	105.66	1119.59	2	560.79	11	-	-	0.294868	0.242206	IGLV3-9*01	24.6	0.002	FR3	100
SGQAPVLVIYEDNK	gi|662564558	198.38	1531.79	2	766.89	14	-	-	0.920393	-0.0238202	IGLV3-10*01	30	2e-05	CDR2	92.9
SGTSASLAIR	gi|386783239	120.45	961.519	2	481.76	10	-	-	0.297052	0.289186	IGLV1-36*01	19.6	0.13	FR3	100
SGTSASLAISGLR	gi|194173403	184.34	1218.66	2	610.33	13	-	-	0.2562	0.222378	IGLV1-47*01	26.9	0.0003	FR3	100
SISTAYLQWR	gi|910276566	132.88	1223.63	2	612.81	10	-	-	0.224585	0.279209	IGHV5-51*05	23.1	0.006	FR3	100
SKNQFSLR	gi|219566321	88.177	978.525	2	490.26	8	-	-	0.833284	0.0452137	IGHV4-39*04	18.5	0.23	FR3	87.5
SLAWYQQKPGQAPR	gi|61970159	160.18	1628.84	2	815.42	14	-	-	0.543776	0.172826	IGKV3-15*01	33.9	8e-07	FR2	92.9
SLIYAASSLQSGVPSK	gi|63103149	82.349	1606.86	2	804.43	16	+	+	0.0122878	0.780952	IGKV1-16*02	33.1	2e-06	CDR2	100
SLNTAYLQWSSLK	gi|46253871	218.11	1509.78	2	755.89	13	+	+	0.00088266	0.642414	IGHV5-51*05	27.7	0.0001	FR3	84.6
SLPVTLGQPASISCR	gi|70798763	147.7	1584.83	2	793.41	15	-	-	0.296433	0.224602	IGKV2-30*01	33.9	8e-07	FR1	100
SLPVTPGEPASISCR	gi|4323960	140.27	1569.78	2	785.89	15	-	-	0.404434	0.217555	IGKV2-28*01	35	3e-07	FR1	100
SLSTAYLQWSSLK	gi|4097044	186.51	1482.77	2	742.39	13	+	+	9.80988e-05	0.812085	IGHV5-51*05	28.9	4e-05	FR3	92.3
SLTSDDTAVYYCAR	gi|432139269	186.13	1620.71	2	811.35	14	+	-	0.00970351	0.604546	IGHV1-18*01	30.8	1e-05	FR3	92.9
SLTTAYLQWSSLK	gi|815068660	187.74	1496.79	2	749.39	13	+	+	0.00183181	0.793538	IGHV5-51*05	27.7	0.0001	FR3	84.6
SNLAWYQQKPGQAPR	gi|3721651	220.4	1742.89	2	872.44	15	-	-	0.625105	0.133235	IGKV3-15*01	37.4	5e-08	FR2	100
SNWPLTFGGGTK	gi|11275314	128.21	1263.62	2	632.81	12	+	-	0.0278474	0.535232	IGKJ4*01	21.2	0.0002	CDR3	100
SNYLAWYQQK	gi|4837691	188.28	1299.62	2	650.81	10	-	-	0.100457	0.597519	IGKV1-27*01	26.9	0.0003	CDR1	100
SPWTFGQGTK	gi|695943041	155.53	1107.53	2	554.77	10	-	-	0.338326	0.284232	IGKJ1*01	23.5	3e-05	CDR3	100
SPYTFGQGTK	gi|358439861	131.52	1084.52	2	543.26	10	-	-	0.0510679	0.545935	IGKV2-24*01	14.6	6.8	FR1	71.4
SSQSLLYR	gi|77379417	105.1	952.498	2	477.25	8	-	-	0.178915	0.477342	IGKV2-30*01	15.8	2	CDR1	85.7
SSQSLVHSNGDTYLSWLQQRPGQPPR	gi|482012	138.28	2937.45	3	980.15	26	-	-	0.183202	0.561577	IGKV2-24*01	55.5	2e-14	CDR1	92.3
SSQSVLYSSNNK	gi|335892418	194.98	1312.63	2	657.31	12	-	-	0.340452	0.274897	IGKV4-1*01	26.6	0.0005	CDR1	100
STSTAYLQWSSLK	gi|106897850	172.57	1470.74	2	736.37	13	+	+	0.00438229	0.803855	IGHV5-78*01	28.5	8e-05	FR3	92.3
STYYADSVK	gi|618855249	70.908	1032.48	2	517.24	9	+	-	0.0189737	0.657406	IGHV3-53*01	22.3	0.014	FR3	100
SVHWYQQK	gi|510102192	120.62	1074.52	2	538.26	8	-	-	0.355447	0.175073	IGLV3-21*01	23.5	0.005	FR2	100
SVHWYQQR	gi|16974104	136.75	1102.53	2	552.27	8	-	-	0.626626	0.111556	IGLV3-21*01	22.3	0.013	FR2	87.5
SVLTQPPSVSAAPGQK	gi|300508589	138.73	1565.84	2	783.92	16	-	-	0.421943	0.196396	IGLV1-41*01	35	3e-07	FR1	100
SVSGSPGQSVTISCTGTR	gi|585379660	137.81	1779.84	2	890.92	18	-	-	0.971873	-0.00874678	IGLV2-11*03	37.7	4e-08	FR1	100
SVSGSPGQSVTISCTGTSSDVGGYNYVSWYQQHPGK	gi|21669519	88.531	3776.7	3	1259.9	36	+	-	0.0268941	0.520713	IGLV2-11*03	80.9	5e-24	CDR1	100
SVTAADTAVYYCAR	gi|152149149	255.16	1546.71	2	774.35	14	-	-	0.849389	0.0426223	IGHV4-34*13	32.3	2e-06	FR3	100
SYELTQPPSVSVSPGQTAR	gi|757819141	245.22	2003	2	1002.5	19	-	-	0.0566786	0.31975	IGLV3-25*03	41.6	2e-09	FR1	100
SYLAWYQQKPGQAPR	gi|323433145	177.93	1791.91	2	896.95	15	-	-	0.314994	0.31833	IGKV3-20*02	37.7	3e-08	FR2	100
SYYWSWIR	gi|343082508	97.635	1159.55	2	580.77	8	-	-	0.226726	0.293771	IGHV4-59*09	25	0.0009	CDR1	100
TAYLQWSSLK	gi|304562465	167.11	1195.62	2	598.81	10	-	-	0.0576179	0.641446	IGHV5-51*05	25	0.001	FR3	100
TDDTALYYCAR	gi|304562521	164.64	1347.58	2	674.79	11	+	-	0.0410299	0.618621	IGHV1-18*01	25.8	0.0008	FR3	81.8
TDGGTTDYAAPVK	gi|158259769	115.57	1294.6	2	648.3	13	-	-	0.0669431	0.739748	IGHV3-15*01	31.6	6e-06	CDR2	100
TFGGGTKVEIKR	gi|62861018	113.95	1291.72	2	646.86	12	-	-	0.649723	-0.156629	IGKJ4*01	26.6	3e-06	CDR3	100
TFGQGTKLELK	gi|5731229	151.13	1220.68	2	611.34	11	-	-	0.54806	0.194287	IGKJ2*01	25.4	7e-06	CDR3	90.9
TFGQGTKLELKR	gi|5731229	190.78	1376.78	2	689.39	12	+	+	0.00715072	-1.02452	IGKJ2*01	25.4	7e-06	CDR3	90.9
TFGQGTKVELK	gi|130381795	174.77	1206.66	2	604.33	11	-	-	0.755316	0.0655135	IGKJ1*01	25.4	7e-06	CDR3	90.9
TFGQGTKVELKR	gi|130381795	190.35	1362.76	2	682.38	12	+	+	0.00488639	-0.871484	IGKJ1*01	25.4	7e-06	CDR3	90.9
TFGQGTKVEVKR	gi|4378282	124.38	1348.75	2	675.37	12	+	-	0.0353972	-0.637223	IGKJ1*01	25.8	5e-06	CDR3	90.9
TFGQGTSIEIK	gi|90994748	145.28	1179.61	2	590.81	11	-	-	0.86231	-0.0417461	IGKJ1*01	23.9	2e-05	CDR3	81.8
TFYADSVK	gi|106897584	88.819	929.449	2	465.72	8	-	-	0.0621103	0.455247	IGHV3-53*01	19.2	0.16	FR3	87.5
TLSLSPGER	gi|585379713	91.867	958.508	2	480.25	9	+	-	0.0274966	0.391355	IGKV3-20*02	21.6	0.025	FR1	100
TNYNPSLK	gi|6531442	71.451	935.471	2	468.74	8	+	-	0.00645631	0.451295	IGHV4-34*13	21.6	0.019	FR3	100
TPVTFGQGTR	gi|323432387	98.898	1062.55	2	532.27	10	-	-	0.77577	0.114889	IGKV2-24*01	15.4	3.2	FR1	71.4
TPWTFGQGTK	gi|695942957	118.03	1121.55	2	561.78	10	-	-	0.181259	0.531713	IGKJ1*01	23.5	3e-05	CDR3	100
TPYTFGQGTK	gi|98956429	143.4	1098.53	2	550.27	10	+	+	0.00408202	1.08225	IGKJ2*01	21.9	0.0001	CDR3	100
TQSPATLSLSPGER	gi|323432750	153.41	1442.74	2	722.37	14	-	-	0.465001	0.160502	IGKV3-20*02	31.2	7e-06	FR1	100
TQSPATLSVSPGER	gi|323432701	143.25	1428.72	2	715.36	14	-	-	0.707271	-0.0783222	IGKV3-15*01	31.2	7e-06	FR1	100
TQSPDSLAVSLGER	gi|84798296	233.28	1458.73	2	730.37	14	-	-	0.204785	-0.547399	IGKV4-1*01	30.4	2e-05	FR1	100
TQSPGTLSLSPGER	gi|70798921	184.51	1428.72	2	715.36	14	+	-	0.0320919	0.435293	IGKV3-20*01	32	4e-06	FR1	100
TYLNWYQQKPGK	gi|4378298	141.1	1524.77	2	763.39	12	-	-	0.973797	0.0108222	IGKV1-39*01	31.2	7e-06	FR2	91.7
TYYADSVR	gi|118405892	74.301	973.451	2	487.73	8	-	-	0.264612	-0.249765	IGHV3-53*01	19.6	0.12	FR3	87.5
VEAEDVGVYY	gi|98956202	101.64	1142.51	1	1143.51	10	-	-	0.091678	0.360504	IGKV2-40*02	24.6	0.002	FR3	100
VEAGDEADYYCQVWDR	gi|460857	159.64	1974.81	2	988.4	16	-	-	0.378334	-0.223313	IGLV3-21*01	38.9	1e-08	CDR3	100
VEDTALYYCAR	gi|304563042	174.4	1359.61	2	680.81	11	-	-	0.391259	0.236693	IGHV3/OR16-12*01	26.6	0.0004	FR3	90.9
VEDTAVYYCAK	gi|371446118	162.26	1317.59	2	659.8	11	-	-	0.998293	-0.000519503	IGHV3/OR16-12*01	26.6	0.0004	FR3	90.9
VEDTAVYYCAR	gi|371446474	205.53	1345.6	2	673.8	11	-	-	0.660379	0.0887468	IGHV3/OR16-12*01	27.7	0.0001	FR3	100
VEDTGVYYCAR	gi|34532827	160.77	1331.58	2	666.79	11	-	-	0.272718	-0.316383	IGHV3/OR16-12*01	26.2	0.0006	FR3	90.9
VLESGGGLVQPGGSLR	gi|112700600	210.91	1524.83	2	763.41	16	-	-	0.957032	0.0138813	IGHV3-23*01	34.3	6e-07	FR1	93.8
VQSGAEVKKPGASVK	gi|46253938	104.94	1483.84	2	742.92	15	-	-	0.209789	0.246499	IGHV1-18*02	32.3	3e-06	FR1	100
VSLSVDTSK	gi|674841812	135.43	934.497	2	468.25	9	-	-	0.313752	0.301631	IGHV4-39*04	18.1	0.33	FR3	77.8
VSNRDSGVPDRFSGSGSGTDFTLK	gi|21669411	119.38	2485.18	2	1243.59	24	+	+	0.0191407	-0.91305	IGKV2-30*01	52.4	3e-13	FR3	100
VTISCSGSSSNIGSK	gi|930625006	107.13	1482.7	2	742.35	15	-	-	0.314853	0.28729	IGLV1-44*01	30.8	1e-05	CDR1	100
VTITCQASQDISK	gi|114385592	190.57	1449.71	2	725.86	13	-	-	0.144684	-0.368827	IGKV1-33*01	27.3	0.0002	CDR1	100
VTITCQASQDLSNYLNWYQQKPGK	gi|700652776	139.38	2841.38	3	948.13	24	-	-	0.931562	0.0164933	IGKV1-33*01	55.1	3e-14	CDR1	95.8
VTLSVDTSR	gi|212675119	121.73	976.519	2	489.26	9	-	-	0.0575313	0.542738	IGHV4-55*07	19.2	0.17	FR3	77.8
VTLTCQASQDIR	gi|405945039	171.26	1390.69	2	696.34	12	-	-	0.347591	-0.212111	IGKV1-33*01	25	0.002	CDR1	90.9
VTLTCR	gi|170684460	122.98	748.39	2	375.2	6	-	-	0.37539	-0.183732	IGKV1/OR9-1*01	16.2	1.4	FR1	83.3
VTSVTAADTAVYYCAR	gi|219566321	228.03	1746.82	2	874.41	16	+	-	0.0167593	0.540116	IGHV4-34*13	33.1	1e-06	FR3	87.5
WFDPWGQGTLVTVSSASTK	gi|304563132	219.99	2066.01	2	1034.01	19	+	+	0.000179544	1.02778	IGHJ5*02	38.5	1e-10	CDR3	100
WGQGTLVTVSSASTK	gi|304562441	195.5	1520.78	2	761.39	15	+	+	0.00156318	0.709271	IGHJ1*01	26.9	2e-06	FR4	100
WIGWVR	gi|7438705	96.839	815.444	2	408.72	6	-	-	0.190191	0.356581	IGHV5-51*05	20.4	0.051	FR2	100
WLAWYQQKPGKAPK	gi|130381771	150.09	1699.92	2	850.96	14	-	-	0.123535	0.530063	IGKV1-12*01	37.7	3e-08	FR2	100
WTFGQGTK	gi|323432701	72.325	923.45	2	462.73	8	-	-	0.144519	0.360278	IGKJ1*01	23.5	3e-05	CDR3	100
YACWYQQK	gi|651207877	143	1145.5	2	573.75	8	+	+	0.00215833	0.917355	IGLV3-1*01	25	0.001	FR2	100
YAYWYQQK	gi|757819141	145.04	1148.53	2	575.26	8	+	+	0.0139897	0.897775	IGLV3-25*03	24.3	0.003	FR2	100
YELTQPPSVSVSPGQTASITCSGDK	gi|587406	201.15	2608.23	2	1305.12	25	-	-	0.0577522	0.447106	IGLV3-1*01	54.7	4e-14	FR1	100
YFDLWGR	gi|304563378	104.45	955.455	2	478.73	7	+	+	0.00119586	0.957021	IGHJ2*01	21.9	8e-05	FR4	100
YIYYADSVK	gi|22000426	71.451	1120.54	2	561.27	9	-	-	0.0839511	0.511478	IGHV3-21*01	23.1	0.008	FR3	100
YLAWYQQK	gi|75765276	163.34	1098.55	2	550.27	8	+	-	0.0257671	0.508801	IGKV3-20*02	23.1	0.007	FR2	100
YLAWYQQKPGQAPR	gi|75765276	219.92	1704.87	2	853.44	14	-	-	0.0927857	0.498851	IGKV3-20*02	36.2	1e-07	FR2	100
YLNWYQQK	gi|4388965	200.12	1141.56	2	571.78	8	-	-	0.0875674	0.412857	IGKV1-33*01	23.9	0.004	FR2	100
YLNWYQQKPGK	gi|4388965	191.45	1423.72	2	712.86	11	-	-	0.180091	0.303749	IGKV1-33*01	30.8	9e-06	FR2	100
YLNWYQQKPGKAPK	gi|4388965	144.57	1719.91	2	860.95	14	-	-	0.067734	0.553703	IGKV1-33*01	37	6e-08	FR2	100
YSPSFEGQVTISADK	gi|190341781	161.94	1627.77	2	814.89	15	+	+	0.00612076	0.663201	IGHV5-51*05	32.7	2e-06	FR3	93.3
YSPSFQGQVTISADR	gi|14268424	101.3	1654.8	2	828.4	15	+	+	0.00120954	0.762171	IGHV5-51*05	32.7	2e-06	FR3	93.3
YSPSFQGQVTLSADK	gi|304563132	264.85	1626.79	2	814.39	15	+	+	0.000130603	0.62432	IGHV5-51*05	33.1	1e-06	FR3	93.3
YTFGQGTK	gi|62988814	88.177	900.434	2	451.22	8	-	-	0.110855	0.310821	IGKJ2*01	21.9	0.0001	CDR3	100
YVSWYQQHPGK	gi|194173457	132.25	1391.66	2	696.83	11	+	+	0.000750347	0.937502	IGLV2-11*03	31.2	6e-06	FR2	100
YWGQGTLVTVSSASTK	gi|4837979	204.9	1683.85	2	842.92	16	-	-	0.243498	0.329263	IGHJ4*01	29.6	2e-07	FR4	100
YWIGWVR	gi|14289112	126.68	978.508	2	490.25	7	-	-	0.431778	0.182613	IGHV5-51*05	23.1	0.005	FR2	100
YYVDSVEGR	gi|4323177	114.86	1086.5	2	544.25	9	+	+	0.00150088	0.980528	IGHV3-52*01	21.6	0.027	FR3	88.9
YYVDSVK	gi|209402818	79.451	872.428	2	437.21	7	+	-	0.0210699	0.572231	IGHV3-52*01	18.9	0.21	FR3	100
YYWSWIR	gi|18307260	152.63	1072.51	2	537.26	7	-	-	0.571526	0.194962	IGHV4-34*13	23.5	0.003	FR2	100

## Sheet: Targeted MS data
Supplementary file 2: Statistical analysis of IgG V domain peptide sequences identified by targeted MS via AIMS strategy. Peptide sequences are detectable in at least one study group (14 CTRL or 13 POAG). Data matrix contains sequence, protein hit, score, mass, charge, m/z, length, p-value, log2 fold change and IgBLASTp search results (most homologous IMGT hit, bitscore, E-value, position within …
CDR: complementarity determining region FR: framework region +: Peptide sequence fulfilled criteria -: Peptide sequence failed to fulfill criteria
Sequence	Protein	Score	Mass	Charges	m/z	Length	p-value ≤ 0.05	Volcano plot (p-value ≤ 0.05; log 2 fold change ≥ 0.5)	p-value	log2 fold difference	IMGT Hit V gene	Bitscore	E-value	IgG framework	Alignment match score
ALIYLASTLQSGVPSR	gi|18025706	132.81	1674.93	2	838.465	16	+	+	0.0123564	0.921983	IGKV1-27*01	30	2e-05	CDR2	93.3
ASGYTFTNYGLSWVR	gi|304562650	219.84	1720.82	2	861.41	15	+	+	0.00740849	0.751845	IGHV1-18*02	34.3	6e-07	CDR1	86.7
ASQSVSSNLAWYQQKPGQAPR	gi|284521128	149.52	2302.15	2	1152.07	21	+	+	0.0109121	0.724325	IGKV3-15*01	47	2e-11	CDR1	100
ASQSVSSSLAWYQQKPGQAPR	gi|323432554	145.99	2275.13	2	1138.57	21	+	+	0.000643471	1.21727	IGKV3-15*01	45.1	1e-10	CDR1	95.2
ASQSVSSSYLAWYQQKPGQAPR	gi|70798921	212.41	2438.2	2	1220.1	22	+	+	0.000970838	0.891515	IGKV3-20*02	48.9	4e-12	CDR1	100
ASQSVSSYLAWYQQK	gi|339272255	166.64	1744.84	2	873.421	15	+	+	5.37785e-05	1.34414	IGKV3-11*01	34.3	6e-07	CDR1	100
ASQSVSSYLAWYQQKPGQAPR	gi|339272255	177.07	2351.17	2	1176.58	21	-	-	0.24824	0.531092	IGKV3-11*01	47.4	2e-11	CDR1	100
ASSLEGGVPSR	gi|7438723	71.085	1058.54	2	530.268	11	-	-	0.356982	0.463726	IGKV1-13*01	22.7	0.011	FR3	90.9
ATGIPDRFR	gi|52630839	107.57	1031.55	2	516.776	9	+	-	0.03619	0.57841	IGKV3-20*01	21.2	0.036	FR3	100
ATGIPDRFSGSGSGTDFTLTLSR	gi|70797863	178.07	2342.15	2	1172.08	23	+	+	0.0014088	1.32168	IGKV3-20*01	48.9	5e-12	FR3	95.7
DIVLTQSPATLSLSPGER	gi|190613407	194.77	1883	2	942.5	18	-	-	0.222115	0.367264	IGKV3-20*02	36.6	1e-07	FR1	94.4
DIVLTQSPDSLAVSLGER	gi|13096223	226.22	1898.99	2	950.497	18	-	-	0.630007	0.206511	IGKV4-1*01	36.6	1e-07	FR1	94.4
DIVMTQSPDSLAVSLGER	gi|453071218	300.28	1916.95	2	959.476	18	+	-	0.028895	0.933963	IGKV4-1*01	37.7	4e-08	FR1	100
DIVMTQSPLSLPVTPGEPASISCR	gi|523391770	98.21	2554.28	2	1278.14	24	-	-	0.922043	0.0355541	IGKV2-28*01	52	4e-13	FR1	100
DLQMTQSPSSLSASVGDR	gi|327410291	293.13	1877.88	2	939.939	18	+	+	0.015654	0.809535	IGKV1-27*01	37	7e-08	FR1	94.4
ELVLTQSPATLSLSPGER	gi|339272255	401.46	1897.02	2	949.508	18	+	+	0.00698265	0.793287	IGKV3-20*02	37	7e-08	FR1	94.4
ELVLTQSPGTLSLSPGER	gi|61970173	394.86	1883	2	942.5	18	+	+	0.00265801	0.649938	IGKV3-20*01	37.7	4e-08	FR1	94.4
ELVMTQSPATLSVSPGER	gi|37728242	233.37	1900.96	2	951.478	18	+	-	0.0202742	0.847618	IGKV3-15*01	37.4	5e-08	FR1	94.4
EVLLTQSPGTLSLSPGER	gi|453071222	371.64	1883	2	942.5	18	-	-	0.567955	-0.405607	IGKV3-20*01	37	7e-08	FR1	88.9
EVQLLESGGGLVQPGGSLR	gi|345110944	55.453	1895.01	2	948.506	19	-	-	0.432556	0.297024	IGHV3-23*01	40.8	3e-09	FR1	100
EVQLVESGGGLVK	gi|662565320	233.59	1313.72	2	657.86	13	+	+	6.64251e-07	1.23495	IGHV3-69-1*01	28.5	8e-05	FR1	100
EVQLVESGGGLVQPGGSLR	gi|630868332	66.606	1881	2	941.498	19	-	-	0.790222	0.110479	IGHV3-13*01	40.8	3e-09	FR1	100
EVQLVQSGAEVK	gi|761232722	119.21	1285.69	2	643.844	12	+	-	0.0188648	0.531666	IGHV1-69-2*01	25.8	0.0008	FR1	100
EVQLVQSGAEVKKPGESLK	gi|761232722	266.39	2025.11	2	1013.56	19	+	+	0.000321964	0.99608	IGHV5-51*01	39.7	8e-09	FR1	100
EVQLVQSGAEVR	gi|662563276	243.37	1313.69	2	657.847	12	-	-	0.190472	0.267834	IGHV1-69-2*01	24.6	0.002	FR1	91.7
EVQLVQSGVEVK	gi|114147626	214.42	1313.72	2	657.86	12	-	-	0.169976	0.539512	IGHV1-69-2*01	24.3	0.003	FR1	91.7
EVVLTQSPATLSLSPGER	gi|630868717	194.77	1883	2	942.5	18	-	-	0.180142	0.411295	IGKV3-20*02	37.4	5e-08	FR1	94.4
FSGSGAGTDFTLK	gi|323433100	243.4	1286.61	2	644.307	13	-	-	0.0801797	0.480462	IGKV2-24*01	30.4	2e-05	FR3	100
FSGSGSGSEFTLTISR	gi|808351594	290.39	1631.78	2	816.89	16	-	-	0.0906071	0.40488	IGKV3-20*02	32.3	3e-06	FR3	87.5
FSGSGSGTDFLLTISR	gi|662563940	155.26	1643.82	2	822.908	16	-	-	0.384036	0.33578	IGKV3-20*02	33.1	2e-06	FR3	93.8
FSGSGSGTDFTLLISR	gi|80975645	137.27	1643.82	2	822.908	16	-	-	0.215126	0.303427	IGKV3-20*02	33.1	2e-06	FR3	93.8
FSGSGSGTDFTLR	gi|523391770	215.02	1330.62	2	666.308	13	+	-	0.0315354	0.428124	IGKV2-28*01	29.3	4e-05	FR3	92.3
FSGSGSGTDFTLTLSR	gi|70797863	310.17	1631.78	2	816.89	16	-	-	0.105932	0.388534	IGKV3-20*02	34.7	4e-07	FR3	93.8
GLEWMGLIYPGDSDTR	gi|106897261	60.246	1808.84	2	905.42	16	-	-	0.0615738	0.630495	IGHV5-51*05	38.9	1e-08	CDR2	93.8
GLEWVSR	gi|345110944	73.616	845.44	2	423.72	7	+	-	0.0200397	0.687626	IGHV3-72*02	18.1	0.25	FR2	85.7
GLEWVSYLSR	gi|371446921	141.1	1208.62	2	605.309	10	+	+	0.00643567	0.907022	IGHV3-11*01	22.7	0.011	FR2	88.9
GTLVTVSSASTK	gi|34532520	53.136	1149.62	2	575.812	12	+	-	0.0491715	0.389653	IGHJ1*01	18.5	0.001	FR4	100
LAWYQQKPGQAPR	gi|75707409	186.74	1541.81	2	771.905	13	-	-	0.190027	0.350405	IGKV3-20*02	33.5	1e-06	FR2	100
LLISWASTR	gi|453071218	195.79	1045.59	2	523.796	9	-	-	0.19081	0.472155	IGKV4-1*01	19.6	0.13	CDR2	88.9
LLIYAATSLQSGVPSR	gi|662564787	117	1674.93	2	838.465	16	+	-	0.0280655	0.804625	IGKV1-12*01	32	4e-06	CDR2	93.8
LLIYDASDR	gi|630869089	137.05	1064.55	2	533.275	9	+	+	0.0113821	0.971262	IGKV3-11*01	19.6	0.12	CDR2	88.9
LLIYDSSNR	gi|440919806	93.598	1079.56	2	540.781	9	-	-	0.123279	0.41463	IGKV3-11*01	20.4	0.067	CDR2	88.9
LLIYDTSNR	gi|27728685	207.29	1093.58	2	547.788	9	-	-	0.134575	0.435852	IGKV3-11*01	20	0.091	CDR2	88.9
LLIYSNNQRPSGVPDR	gi|62205367	97.273	1827.96	2	914.98	16	-	-	0.841943	0.0529446	IGLV1-44*01	37	7e-08	CDR2	100
LLIYWASAR	gi|67464527	168.26	1091.61	2	546.806	9	-	-	0.0893405	0.608235	IGKV4-1*01	21.2	0.038	CDR2	88.9
LLLYDVSNR	gi|722434	239.6	1091.6	2	546.799	9	+	-	0.0332397	0.745799	IGLV2-14*03	20	0.088	CDR2	77.8
LLLYGTSNR	gi|197115433	150.27	1035.57	2	518.786	9	-	-	0.131158	0.533325	IGLV1-40*01	19.2	0.17	CDR2	77.8
LQESGPGLVK	gi|21757093	95.483	1026.57	2	514.285	10	+	-	0.0441546	0.671359	IGHV4-4*03	23.9	0.004	FR1	100
LVESGGGLVKPGGSLR	gi|323433102	154.81	1524.86	2	763.431	16	+	+	0.0061154	0.889324	IGHV3-69-1*01	35.4	2e-07	FR1	100
LVLTQSPGTLSLSPGER	gi|2599536	289.5	1753.96	2	877.979	17	+	+	0.00381593	0.944881	IGKV3-20*01	35.8	2e-07	FR1	94.1
NDLGWYQQKPGK	gi|662564787	43.68	1432.71	2	717.355	12	+	+	0.00778291	0.832406	IGKV1-17*01	32.7	2e-06	FR2	100
NDLGWYQQKPGKAPK	gi|662564787	132.06	1728.89	2	865.447	15	-	-	0.852735	0.0449309	IGKV1-17*01	38.9	1e-08	FR2	100
NGYLAWYQQK	gi|695942258	205.12	1269.61	2	635.807	10	-	-	0.135234	-0.475712	IGKV3-20*02	23.5	0.005	CDR1	80
NQFSLK	gi|21757093	133.47	735.392	2	368.696	6	+	+	0.00753096	0.587414	IGHV4-39*04	16.2	1.2	FR3	100
NSLYLQLNSLR	gi|33318950	166.45	1319.72	2	660.86	11	-	-	0.215069	0.320907	IGHV3-13*01	24.3	0.003	FR3	90.9
NSLYLQMNSLR	gi|209402818	227.48	1337.68	2	669.838	11	+	+	0.00614737	0.889101	IGHV3-13*01	25.4	0.001	FR3	100
NWFDPWGQGTLVTVSSASTK	gi|30407984	182	2180.05	2	1091.03	20	-	-	0.0931429	0.462151	IGHJ5*02	40.8	2e-11	CDR3	100
QAPGKGLEWVGR	gi|158259769	127.52	1296.69	2	649.347	12	-	-	0.31233	-0.418258	IGHV3-72*02	30.8	8e-06	FR2	100
QLVQSGAEVK	gi|323430773	119.22	1057.58	2	529.788	10	+	+	0.00255459	0.780851	IGHV1-69*03	22.3	0.014	FR1	100
QSPGTLSLSPGER	gi|70797863	135.91	1327.67	2	664.837	13	-	-	0.484653	0.321153	IGKV3-20*01	30	2e-05	FR1	100
QVELVESGGGLVK	gi|371446908	244.71	1313.72	2	657.86	13	+	+	7.4162e-06	1.11893	IGHV3-11*01	27.3	0.0002	FR1	92.3
QVELVESGGGLVKPGGSLR	gi|371446908	59.154	1881.03	2	941.516	19	+	+	0.00482437	0.687785	IGHV3-11*01	39.7	8e-09	FR1	94.7
QVELVQSGAEVKK	gi|407943831	42.388	1413.78	2	707.891	13	-	-	0.0943867	0.407032	IGHV1-69*03	26.6	0.0004	FR1	92.3
QVELVQSGAEVR	gi|19772951	217.46	1313.69	2	657.847	12	-	-	0.24775	0.241951	IGHV1-69*03	23.5	0.006	FR1	83.3
QVQLVESGAEVKKPGESLK	gi|674841854	185.96	2025.11	2	1013.56	19	+	+	0.000305799	0.998849	IGHV5-51*01	37.4	5e-08	FR1	89.5
SDDTAVYFCAR	gi|194376338	152.07	1303.55	2	652.775	11	-	-	0.247725	0.364885	IGHV1-18*01	26.6	0.0004	FR3	90.9
SLIYAASSLQSGVPSK	gi|63103149	42.095	1606.86	2	804.428	16	+	-	0.0495136	0.73379	IGKV1-16*02	33.1	2e-06	CDR2	100
SLNTAYLQWSSLK	gi|46253871	246.31	1509.78	2	755.891	13	+	-	0.0174527	0.490216	IGHV5-51*05	27.7	0.0001	FR3	84.6
SLSTAYLQWSSLK	gi|4097044	208.27	1482.77	2	742.386	13	+	+	0.00107258	0.863547	IGHV5-51*05	28.9	4e-05	FR3	92.3
SPYTFGQGTK	gi|358439861	65.695	1084.52	2	543.259	10	-	-	0.356434	0.25664	IGKJ2*01	21.9	0.0001	FR4	100
STSTAYLQWSSLK	gi|190341781	179.46	1470.74	2	736.368	13	+	+	0.00364965	0.791465	IGHV5-78*01	28.5	8e-05	FR3	92.3
TDDTALYYCAR	gi|304562521	161.67	1347.58	2	674.788	11	-	-	0.123854	0.440257	IGHV1-18*01	25.8	0.0008	FR3	81.8
TFGQGTKLELKR	gi|5731229	202.18	1376.78	2	689.389	12	-	-	0.987724	0.00475698	IGKJ2*01	25.4	7e-06	CDR3	90.9
TFGQGTKVELKR	gi|130381795	162.31	1362.76	2	682.381	12	-	-	0.703286	0.0805462	IGKJ1*01	25.4	7e-06	CDR3	90.9
TQSPGTLSLSPGER	gi|70798921	154.72	1428.72	2	715.36	14	-	-	0.222495	0.349722	IGKV3-20*01	32	4e-06	FR1	100
VLESGGGLVQPGGSLR	gi|112696672	209.23	1524.83	2	763.413	16	-	-	0.892229	-0.0812729	IGHV3-23*01	34.3	6e-07	FR1	93.8
VTSVTAADTAVYYCAR	gi|219566321	241.42	1746.82	2	874.412	16	+	+	0.00425657	0.769167	IGHV4-34*13	33.1	1e-06	FR3	87.5
WFDPWGQGTLVTVSSASTK	gi|304563132	209.85	2066.01	2	1034.01	19	+	+	0.00359184	0.994828	IGHJ5*02	38.5	1e-10	CDR3	100
WGQGTLVTVSSASTK	gi|304562441	216	1520.78	2	761.392	15	-	-	0.0718629	0.919798	IGHJ1*01	26.9	2e-06	FR4	100
YFDLWGR	gi|304563378	128.57	955.455	2	478.728	7	+	+	0.00578917	0.923646	IGHJ2*01	21.9	8e-05	FR4	100
YSPSFEGQVTISADK	gi|190341781	86.777	1627.77	2	814.886	15	-	-	0.118503	0.356603	IGHV5-51*05	32.7	2e-06	FR3	93.3
YSPSFEGQVTITGDK	gi|21670685	73.722	1627.77	2	814.886	15	-	-	0.0955976	0.331794	IGHV5-51*05	30	2e-05	FR3	80
YSPSFQGQVTLSADK	gi|304563132	49.595	1626.79	2	814.394	15	+	-	0.0102073	0.490847	IGHV5-51*05	33.1	1e-06	FR3	93.3

## Sheet: Discovery and Targeted MS data
Supplementary file 2: Overlap of IgG V domain peptide sequences identified in the discovery study and by targeted MS via AIMS strategy. Data matrix contains sequence, protein hit, score, mass, charge, m/z, length, p-value, log2 fold change and IgBLASTp search results (most homologous IMGT hit, bitscore, E-value, position within the IgG framework, Alignment match score).
CDR: complementarity determining region FR: framework region +: Peptide sequence fulfilled criteria -: Peptide sequence failed to fulfill criteria n.d.: not detectable in at least one study group
		Discovery study				AIMS
Sequence	Search	p-value ≤ 0.05	Volcano plot (p-value ≤ 0.05; log 2 fold change ≥ 0.5)	p-value	log2 fold change	p-value ≤ 0.05	Volcano plot (p-value ≤ 0.05; log 2 fold change ≥ 0.5)	p-value	log2 fold change	Protein	Score	Mass	Charges	m/z	Length	IMGT hit	Bitscore	E-value	IgG framework	Alignment match score
AIQMTQSPSSLSASVGDR	Discovery	+	+	3.78269e-05	1.97048	n.d.	n.d.	-	-	gi|662564787	232.37	1833.89	2	917.94	18	IGKV1-6*01	37	7e-08	FR1	94.4
ALIYLASTLQSGVPSR	Discovery / AIMS	+	-	0.0402834	0.54918	+	+	0.0123564	0.921983	gi|18025706	165.89	1674.93	2	838.47	16	IGKV1-27*01	30	2e-05	CDR2	88.9
ASDTAMYYCAR	Discovery	+	+	0.000173142	1.29799	n.d.	n.d.	-	-	gi|761232722	145.46	1307.53	2	654.76	11	IGHV5-10-1*01	27.7	0.0001	FR3	100
ASGYTFTNYGLSWVR	Discovery / AIMS	+	-	0.0222702	0.679433	+	+	0.00740849	0.751845	gi|304562650	230.57	1720.82	2	861.41	15	IGHV1-18*02	34.3	6e-07	CDR1	100
ASQSLSSWLAWYQQKPGKAPK	Discovery	+	+	0.00109534	1.16337	n.d.	n.d.	-	-	gi|323433041	113.88	2360.23	3	787.74	21	IGKV1-5*01	48.1	8e-12	CDR1	100
ASQSVGSNLAWYQQKPGQAPR	Discovery	+	+	0.000357363	1.54479	n.d.	n.d.	-	-	gi|630869019	166.67	2272.13	2	1137.07	21	IGKV3-15*01	45.4	8e-11	CDR1	100
ASQSVNSNLAWYQQKPGQAPR	Discovery	+	+	0.000754781	1.12916	n.d.	n.d.	-	-	gi|87906	166.36	2329.16	2	1165.58	21	IGKV3-15*01	45.8	6e-11	CDR1	91.7
ASQSVSSNLAWYQQKPGQAPR	Discovery / AIMS	+	-	0.0485416	0.557291	+	+	0.0109121	0.724325	gi|284521128	210.43	2302.15	2	1152.07	21	IGKV3-15*01	47	2e-11	CDR1	94.4
ASQSVSSNLAWYQQRPGQAPR	Discovery	+	+	0.000508072	0.611574	n.d.	n.d.	-	-	gi|237702286	79.393	2330.15	3	777.72	21	IGKV3-15*01	45.8	6e-11	CDR1	87.5
ASQSVSSNYLAWYQQKPGQAPR	Discovery	+	-	0.0165566	0.68783	n.d.	n.d.	-	-	gi|190613407	164.02	2465.21	2	1233.6	22	IGKV3-20*02	47.8	1e-11	CDR1	93.8
ASQSVSSSLAWYQQKPGQAPR	Discovery / AIMS	+	+	0.00451794	1.01591	+	+	0.000643471	1.21727	gi|323432554	166.67	2275.13	2	1138.57	21	IGKV3-15*01	45.1	1e-10	CDR1	93.8
ASQSVSSSYLAWYQQKPGQAPR	Discovery / AIMS	+	+	0.000708371	0.956413	+	+	0.000970838	0.891515	gi|149673891	212.41	2438.2	2	1220.1	22	IGKV3-20*02	48.9	4e-12	CDR1	77.8
ASQSVSSYLAWYQQK	Discovery / AIMS	+	+	0.000292204	0.813823	+	+	5.37785e-05	1.34414	gi|339272255	225.09	1744.84	2	873.42	15	IGKV3-11*01	34.3	6e-07	CDR1	90.9
ASQSVSSYLAWYQQKPGQAPR	Discovery / AIMS	+	+	0.0029161	0.742186	-	-	0.24824	0.531092	gi|339272255	240.34	2351.17	2	1176.58	21	IGKV3-11*01	47.4	2e-11	CDR1	94.7
ASSLEGGVPSR	Discovery / AIMS	+	+	0.00597476	0.749596	-	-	0.356982	0.463726	gi|7438723	105.25	1058.54	2	530.27	11	IGKV1-13*01	22.7	0.011	FR3	83.3
ASSLESGVPSR	Discovery	+	+	0.00544006	0.806415	n.d.	n.d.	-	-	gi|442828	178.71	1088.55	2	545.27	11	IGKV1-13*01	24.3	0.003	FR3	89.5
ATGIPDRFR	Discovery / AIMS	+	+	0.00754161	0.654821	+	-	0.03619	0.57841	gi|52630839	108.57	1031.55	2	516.78	9	IGKV3-20*01	21.2	0.036	FR3	100
ATGIPDRFSGSGSGTDFTLTLSR	Discovery / AIMS	+	+	1.47785e-06	1.36408	+	+	0.0014088	1.32168	gi|70797863	178.07	2342.15	2	1172.08	23	IGKV3-20*01	48.9	5e-12	FR3	93.8
DIQLTQSPSTLSASVGDR	Discovery	+	+	0.00683817	0.633891	n.d.	n.d.	-	-	gi|27531086	251.74	1873.94	2	937.97	18	IGKV1-5*01	37	7e-08	FR1	80
DIQMTQSPSSVSASVGDR	Discovery	+	+	0.000211755	1.823	n.d.	n.d.	-	-	gi|820957471	300.25	1863.86	2	932.93	18	IGKV1-12*01	37.7	4e-08	FR1	100
DIQMTQSPSTLSASVGDR	Discovery	+	+	0.00207451	1.51083	n.d.	n.d.	-	-	gi|442828	310.55	1891.89	2	946.95	18	IGKV1-5*01	38.1	3e-08	FR1	93.3
DIVLTQSPATLSLSPGER	AIMS	n.d.	n.d.	-	-	-	-	0.222115	0.367264	gi|190613407	194.77	1883	2	942.5	18	IGKV3-20*02	36.6	1e-07	FR1	100
DIVLTQSPDSLAVSLGER	Discovery / AIMS	+	+	0.00199972	1.07533	-	-	0.630007	0.206511	gi|13096223	248.7	1898.99	2	950.5	18	IGKV4-1*01	36.6	1e-07	FR1	86.7
DIVMTQSPDSLAVSLGER	Discovery / AIMS	+	+	0.000359136	1.79651	+	-	0.028895	0.933963	gi|335892418	300.28	1916.95	2	959.48	18	IGKV4-1*01	37.7	4e-08	FR1	95.2
DIVMTQSPLSLPVTPGEPASISCR	Discovery / AIMS	+	+	0.0228282	0.963685	-	-	0.922043	0.0355541	gi|218783338	221.99	2554.28	2	1278.14	24	IGKV2-28*01	52	4e-13	FR1	95.2
DLQMTQSPSSLSASVGDR	Discovery / AIMS	+	+	3.09438e-05	1.68378	+	+	0.015654	0.809535	gi|327410291	293.13	1877.88	2	939.94	18	IGKV1-27*01	37	7e-08	FR1	95.2
DVQLVQSGAEVK	Discovery	+	+	0.00263406	0.773129	n.d.	n.d.	-	-	gi|821350640	185.2	1271.67	2	636.84	12	IGHV1-69-2*01	24.6	0.002	FR1	100
DVWGQGTTVTVSSASTK	Discovery	+	-	0.0342938	0.409035	n.d.	n.d.	-	-	gi|342731405	225.17	1722.84	2	862.42	17	IGHJ6*01	31.2	6e-08	FR4	95.2
ELVFTQSPATLSVSPGER	Discovery	+	-	0.0312272	0.544235	n.d.	n.d.	-	-	gi|339272251	112.91	1916.98	2	959.49	18	IGKV3-15*01	35.4	2e-07	FR1	95.5
ELVLTQSPATLSLSPGER	Discovery / AIMS	+	+	0.000881041	0.657139	+	+	0.00698265	0.793287	gi|339272255	401.46	1897.02	2	949.51	18	IGKV3-20*02	37	7e-08	FR1	95.2
ELVLTQSPGTLSLSPGER	Discovery / AIMS	+	+	0.0220533	1.15578	+	+	0.00265801	0.649938	gi|61970173	394.86	1883	2	942.5	18	IGKV3-20*01	37.7	4e-08	FR1	100
ELVMTQSPATLSVSPGER	Discovery / AIMS	+	+	0.000953806	1.44577	+	-	0.0202742	0.847618	gi|37728242	281.65	1900.96	2	951.48	18	IGKV3-15*01	37.4	5e-08	FR1	100
EVLLTQSPGTLSLSPGER	AIMS	n.d.	n.d.	-	-	-	-	0.567955	-0.405607	gi|453071222	371.64	1883	2	942.5	18	IGKV3-20*01	37	7e-08	FR1	100
EVQLLESGGGLVQPGGSLR	AIMS	n.d.	n.d.	-	-	-	-	0.432556	0.297024	gi|345110944	55.453	1895.01	2	948.506	19	IGHV3-23*01	40.8	3e-09	FR1	90.9
EVQLVESGGGLVK	AIMS	n.d.	n.d.	-	-	+	+	6.64251e-07	1.23495	gi|662565320	233.59	1313.72	2	657.86	13	IGHV3-69-1*01	28.5	8e-05	FR1	100
EVQLVESGGGLVQPGGSLR	AIMS	n.d.	n.d.	-	-	-	-	0.790222	0.110479	gi|630868332	66.606	1881	2	941.498	19	IGHV3-13*01	40.8	3e-09	FR1	100
EVQLVQSGAEVK	AIMS	n.d.	n.d.	-	-	+	-	0.0188648	0.531666	gi|761232722	119.21	1285.69	2	643.844	12	IGHV1-69-2*01	25.8	0.0008	FR1	95.7
EVQLVQSGAEVKKPGESLK	Discovery / AIMS	+	-	0.0153067	0.490939	+	+	0.000321964	0.99608	gi|761232722	266.39	2025.11	2	1013.56	19	IGHV5-51*01	39.7	8e-09	FR1	94.4
EVQLVQSGAEVR	AIMS	n.d.	n.d.	-	-	-	-	0.190472	0.267834	gi|662563276	243.37	1313.69	2	657.847	12	IGHV1-69-2*01	24.6	0.002	FR1	100
EVQLVQSGVEVK	Discovery / AIMS	+	+	0.0105986	1.00114	-	-	0.169976	0.539512	gi|114147626	236.28	1313.72	2	657.86	12	IGHV1-69-2*01	24.3	0.003	FR1	100
EVVLTQSPATLSLSPGER	AIMS	n.d.	n.d.	-	-	-	-	0.180142	0.411295	gi|630868717	194.77	1883	2	942.5	18	IGKV3-20*02	37.4	5e-08	FR1	94.4
FDYWGQGTLVTVSSASTK	Discovery	+	+	4.64827e-05	1.0524	n.d.	n.d.	-	-	gi|304563214	197.84	1945.94	2	973.97	18	IGHJ4*01	34.3	5e-09	CDR3	100
FLAWYQQK	Discovery	+	-	0.0322796	0.521958	n.d.	n.d.	-	-	gi|323432838	138.85	1082.55	2	542.28	8	IGKV3-20*02	21.6	0.024	FR2	100
FSGSGAGTDFTLK	Discovery / AIMS	+	+	0.00466546	0.614729	-	-	0.0801797	0.480462	gi|323433100	249.98	1286.61	2	644.31	13	IGKV2-24*01	30.4	2e-05	FR3	94.4
FSGSGSGSEFTLTISR	AIMS	n.d.	n.d.	-	-	-	-	0.0906071	0.40488	gi|808351594	290.39	1631.78	2	816.89	16	IGKV3-20*02	32.3	3e-06	FR3	91.7
FSGSGSGTDFLLTISR	AIMS	n.d.	n.d.	-	-	-	-	0.384036	0.33578	gi|662563940	155.26	1643.82	2	822.908	16	IGKV3-20*02	33.1	2e-06	FR3	100
FSGSGSGTDFTLLISR	Discovery / AIMS	+	+	0.00388661	0.691623	-	-	0.215126	0.303427	gi|80975645	167.18	1643.82	2	822.91	16	IGKV3-20*02	33.1	2e-06	FR3	88.9
FSGSGSGTDFTLR	Discovery / AIMS	+	+	0.00357576	0.549808	+	-	0.0315354	0.428124	gi|523391770	215.02	1330.62	2	666.31	13	IGKV2-28*01	29.3	4e-05	FR3	94.4
FSGSGSGTDFTLTISSLQAEDVAVYYCQQYYSTPPL	Discovery	+	+	0.000667487	1.29672	n.d.	n.d.	-	-	gi|15919681	95.445	3951.8	3	1318.27	36	IGKV4-1*01	73.2	6e-21	CDR3	94.4
FSGSGSGTDFTLTLSR	Discovery / AIMS	+	-	0.0203424	0.43151	-	-	0.105932	0.388534	gi|70797863	310.17	1631.78	2	816.89	16	IGKV3-20*02	34.7	4e-07	FR3	94.4
FTFGPGTK	Discovery	+	-	0.0189434	0.746271	n.d.	n.d.	-	-	gi|21669299	110.41	853.433	2	427.72	8	IGKJ3*01	22.3	7e-05	CDR3	100
GLEWMGLIYPGDSDTR	Discovery / AIMS	+	+	0.00769916	0.908963	-	-	0.0615738	0.630495	gi|106897261	163.8	1808.84	2	905.42	16	IGHV5-51*05	38.9	1e-08	CDR2	91.7
GLEWVANLK	Discovery	+	+	0.00268567	0.680988	n.d.	n.d.	-	-	gi|630868332	177.36	1028.57	2	515.28	9	IGHV3-7*01	22.7	0.01	FR2	100
GLEWVGR	Discovery	+	+	0.00307993	0.557792	n.d.	n.d.	-	-	gi|158259769	158.38	815.429	2	408.71	7	IGHV3-72*02	20.4	0.033	FR2	87.5
GLEWVSR	Discovery / AIMS	+	-	0.0205803	0.477411	+	-	0.0200397	0.687626	gi|345110944	113.89	845.44	2	423.72	7	IGHV3-72*02	18.1	0.25	FR2	100
GLEWVSSISR	Discovery	+	+	0.00212054	0.782896	n.d.	n.d.	-	-	gi|63022996	164.64	1132.59	2	567.29	10	IGHV3-38-3*01	22.3	0.015	FR2	93.8
GLEWVSSISSR	Discovery	+	+	0.00198057	0.763996	n.d.	n.d.	-	-	gi|662565320	120.57	1219.62	2	610.81	11	IGHV3-69-1*01	23.9	0.004	CDR2	92.3
GLEWVSYLSR	Discovery / AIMS	+	-	0.0379408	0.69149	+	+	0.00643567	0.907022	gi|371446921	141.1	1208.62	2	605.31	10	IGHV3-11*01	22.7	0.011	FR2	100
GLVWVSR	Discovery	+	-	0.0366039	0.526302	n.d.	n.d.	-	-	gi|2765421	113.7	815.465	2	408.73	7	IGHV3-74*01	19.2	0.15	FR2	93.8
GTLVTVSSASTK	Discovery / AIMS	+	+	0.00120351	0.469132	+	-	0.0491715	0.389653	gi|34532520	173.72	1149.62	2	575.81	12	IGHJ1*01	18.5	0.001	FR4	100
INSDGSSTSYADSVK	Discovery	+	+	0.0202746	0.926064	n.d.	n.d.	-	-	gi|158714463	91.592	1529.68	2	765.84	15	IGHV3-74*01	32.7	2e-06	CDR2	93.8
LAWYQQK	Discovery	+	+	0.00524763	0.633512	n.d.	n.d.	-	-	gi|160286048	143.97	935.486	2	468.74	7	IGKV3-20*02	20.4	0.059	FR2	88.9
LAWYQQKPGQAPR	Discovery / AIMS	+	-	0.0185859	0.472411	-	-	0.190027	0.350405	gi|75707409	190.26	1541.81	2	771.91	13	IGKV3-20*02	33.5	1e-06	FR2	100
LLISWASTR	Discovery / AIMS	+	-	0.0419491	0.471686	-	-	0.19081	0.472155	gi|453071218	200.6	1045.59	2	523.8	9	IGKV4-1*01	19.6	0.13	CDR2	85.7
LLIYAASTR	Discovery	+	-	0.0061162	0.469611	n.d.	n.d.	-	-	gi|3721651	158.87	1006.58	2	504.29	9	IGKV3-15*01	18.9	0.22	CDR2	100
LLIYAATSLQSGVPSR	AIMS	n.d.	n.d.	-	-	+	-	0.0280655	0.804625	gi|662564787	117	1674.93	2	838.465	16	IGKV1-12*01	32	4e-06	CDR2	100
LLIYDASDR	Discovery / AIMS	+	-	0.0366823	0.71159	+	+	0.0113821	0.971262	gi|630869089	147.4	1064.55	2	533.28	9	IGKV3-11*01	19.6	0.12	CDR2	88.9
LLIYDASNLQTGVPSR	Discovery	+	-	0.0209514	0.626659	n.d.	n.d.	-	-	gi|14268412	183.36	1745.93	2	873.97	16	IGKV1-33*01	33.9	8e-07	CDR2	100
LLIYDSSNR	Discovery / AIMS	+	-	0.0336113	0.575983	-	-	0.123279	0.41463	gi|440919806	126.07	1079.56	2	540.78	9	IGKV3-11*01	20.4	0.067	CDR2	100
LLIYDTSNR	Discovery / AIMS	+	-	0.00791594	0.524897	-	-	0.134575	0.435852	gi|27728685	207.29	1093.58	2	547.79	9	IGKV3-11*01	20	0.091	CDR2	100
LLIYEVSK	Discovery	+	+	0.0106962	0.848006	n.d.	n.d.	-	-	gi|882264	95.358	963.564	2	482.78	8	IGLV2-8*03	18.1	0.37	CDR2	100
LLIYQISNR	Discovery	+	-	0.0333514	0.93495	n.d.	n.d.	-	-	gi|696826020	179.81	1118.64	2	560.32	9	IGKV2-24*01	19.6	0.13	CDR2	100
LLIYSNNQR	Discovery	+	-	0.0119799	0.517485	n.d.	n.d.	-	-	gi|62205367	126.24	1119.6	2	560.8	9	IGLV1-44*01	21.9	0.02	CDR2	88.9
LLIYSNNQRPSGVPDR	Discovery / AIMS	+	+	0.00671832	0.855631	-	-	0.841943	0.0529446	gi|62205367	103.14	1827.96	2	914.98	16	IGLV1-44*01	37	7e-08	CDR2	88.9
LLIYWASAR	Discovery / AIMS	+	-	0.0429168	0.541978	-	-	0.0893405	0.608235	gi|67464527	168.26	1091.61	2	546.81	9	IGKV4-1*01	21.2	0.038	CDR2	88.9
LLLYDVSNR	AIMS	n.d.	n.d.	-	-	+	-	0.0332397	0.745799	gi|722434	239.6	1091.6	2	546.799	9	IGLV2-14*03	20	0.088	CDR2	93.8
LLLYGASR	Discovery	+	-	0.0129713	0.499698	n.d.	n.d.	-	-	gi|524453553	124.98	891.518	2	446.76	8	IGKV1-NL1*01	16.9	0.9	CDR2	88.9
LLLYGASSR	Discovery	+	-	0.00543807	0.428584	n.d.	n.d.	-	-	gi|47271294	164.68	978.55	2	490.27	9	IGKV3-20*02	20	0.088	CDR2	88.9
LLLYGTSNR	Discovery / AIMS	+	-	0.0376927	0.521417	-	-	0.131158	0.533325	gi|197115433	186.41	1035.57	2	518.79	9	IGLV1-40*01	19.2	0.17	CDR2	87.5
LLLYWASTR	Discovery	+	+	0.00102149	0.60793	n.d.	n.d.	-	-	gi|323432988	233.57	1121.62	2	561.81	9	IGKV4-1*01	22.3	0.015	CDR2	88.9
LQESGPGLVK	Discovery / AIMS	+	-	0.0371159	0.6205	+	-	0.0441546	0.671359	gi|21757093	107.55	1026.57	2	514.29	10	IGHV4-4*03	23.9	0.004	FR1	100
LVESGGGLVKPGGSLR	Discovery / AIMS	+	+	0.0116585	0.716458	+	+	0.0061154	0.889324	gi|323433102	154.81	1524.86	2	763.43	16	IGHV3-69-1*01	35.4	2e-07	FR1	100
LVLTQSPGTLSLSPGER	Discovery / AIMS	+	-	0.0206081	0.602814	+	+	0.00381593	0.944881	gi|2599536	289.5	1753.96	2	877.98	17	IGKV3-20*01	35.8	2e-07	FR1	88.9
NDLGWYQQK	Discovery	+	+	0.00240477	0.726589	n.d.	n.d.	-	-	gi|152149150	122.94	1150.54	2	576.27	9	IGKV1-17*01	25.8	0.0007	FR2	87.5
NDLGWYQQKPGK	Discovery / AIMS	+	+	0.00124688	0.72195	+	+	0.00778291	0.832406	gi|152149150	193.62	1432.71	2	717.35	12	IGKV1-17*01	32.7	2e-06	FR2	88.9
NDLGWYQQKPGKAPK	Discovery / AIMS	+	-	0.018842	0.725423	-	-	0.852735	0.0449309	gi|152149150	132.06	1728.89	2	865.45	15	IGKV1-17*01	38.9	1e-08	FR2	77.8
NEDTAIYYCAR	Discovery	+	+	0.0165427	-0.856005	n.d.	n.d.	-	-	gi|8699279	90.05	1374.59	2	688.29	11	IGHV1-69*06	26.2	0.0006	FR3	88.9
NGYLAWYQQK	Discovery / AIMS	+	+	0.00411824	-0.761545	-	-	0.135234	-0.475712	gi|695942258	205.12	1269.61	2	635.81	10	IGKV3-20*02	23.5	0.005	CDR1	100
NIQMTQSPSSLSASVGDR	Discovery	+	+	0.0021171	1.17031	n.d.	n.d.	-	-	gi|444737639	192.22	1876.89	2	939.45	18	IGKV1-33*01	35.8	2e-07	FR1	100
NQFSLK	Discovery / AIMS	+	+	0.00268646	0.965982	+	+	0.00753096	0.587414	gi|284521128	132.72	735.392	2	368.7	6	IGHV4-39*04	16.2	1.2	FR3	94.1
NSLFLQMNSLR	Discovery	+	-	0.0449446	0.702491	n.d.	n.d.	-	-	gi|270047628	198.55	1321.68	2	661.84	11	IGHV3-13*01	23.9	0.004	FR3	100
NSLYLQLNSLR	AIMS	n.d.	n.d.	-	-	-	-	0.215069	0.320907	gi|33318950	166.45	1319.72	2	660.86	11	IGHV3-13*01	24.3	0.003	FR3	100
NSLYLQMNNLR	Discovery	+	-	0.0302374	0.499915	n.d.	n.d.	-	-	gi|695942270	169.99	1364.69	2	683.34	11	IGHV3-38*01	25	0.002	FR3	100
NSLYLQMNSLR	Discovery / AIMS	+	+	1.04179e-06	1.97736	+	+	0.00614737	0.889101	gi|209402818	303.71	1337.68	2	669.84	11	IGHV3-13*01	25.4	0.001	FR3	81.8
NTLYLQMN	Discovery	+	+	0.00152414	1.31283	n.d.	n.d.	-	-	gi|630868188	172.15	995.475	1	996.47	8	IGHV3-38*01	20.8	0.048	FR3	80
NWFDPWGQGTLVTVSSASTK	Discovery / AIMS	+	-	0.0496217	0.380694	-	-	0.0931429	0.462151	gi|30407984	234.22	2180.05	2	1091.03	20	IGHJ5*02	40.8	2e-11	CDR3	94.4
NYLAWYQQKPGQPPK	Discovery	+	-	0.0183976	0.553708	n.d.	n.d.	-	-	gi|335892418	179.67	1816.93	2	909.46	15	IGKV4-1*01	39.7	7e-09	FR2	100
QAPGKGLEWVGR	Discovery / AIMS	+	+	0.00444528	-1.74465	-	-	0.31233	-0.418258	gi|158259769	127.52	1296.69	2	649.35	12	IGHV3-72*02	30.8	8e-06	FR2	90.9
QLVQSGAEVK	Discovery / AIMS	+	-	0.0146604	0.501081	+	+	0.00255459	0.780851	gi|323430773	119.22	1057.58	2	529.79	10	IGHV1-69*03	22.3	0.014	FR1	90.9
QSPGTLSLSPGER	Discovery / AIMS	+	+	0.0121996	0.711162	-	-	0.484653	0.321153	gi|70797863	135.91	1327.67	2	664.84	13	IGKV3-20*01	30	2e-05	FR1	100
QVELVESGGGLVK	Discovery / AIMS	+	+	0.00330104	1.29267	+	+	7.4162e-06	1.11893	gi|371446908	255.08	1313.72	2	657.86	13	IGHV3-11*01	27.3	0.0002	FR1	100
QVELVESGGGLVKPGGSLR	AIMS	n.d.	n.d.	-	-	+	+	0.00482437	0.687785	gi|371446908	59.154	1881.03	2	941.516	19	IGHV3-11*01	39.7	8e-09	FR1	100
QVELVQSGAEVK	Discovery	+	+	0.00373458	0.789141	n.d.	n.d.	-	-	gi|407943831	314.35	1285.69	2	643.84	12	IGHV1-69*03	24.6	0.002	FR1	100
QVELVQSGAEVKK	Discovery / AIMS	+	-	0.0498317	0.49041	-	-	0.0943867	0.407032	gi|407943831	164.92	1413.78	2	707.89	13	IGHV1-69*03	26.6	0.0004	FR1	100
QVELVQSGAEVR	AIMS	n.d.	n.d.	-	-	-	-	0.24775	0.241951	gi|19772951	217.46	1313.69	2	657.847	12	IGHV1-69*03	23.5	0.006	FR1	100
QVQLVESGAEVKKPGESLK	AIMS	n.d.	n.d.	-	-	+	+	0.000305799	0.998849	gi|674841854	185.96	2025.11	2	1013.56	19	IGHV5-51*01	37.4	5e-08	FR1	100
SDDTAVYFCAR	Discovery / AIMS	+	-	0.0466356	0.615133	-	-	0.247725	0.364885	gi|194376338	152.07	1303.55	2	652.78	11	IGHV1-18*01	26.6	0.0004	FR3	92.3
SDDTAVYYCAR	Discovery	+	-	0.0116739	0.499681	n.d.	n.d.	-	-	gi|480312173	161.67	1319.55	2	660.77	11	IGHV1-18*01	28.1	0.0001	FR3	91.7
SDDTAVYYCARGYR	Discovery	+	+	0.00156727	0.854837	n.d.	n.d.	-	-	gi|815095215	120.55	1695.73	2	848.87	14	IGHV1-18*01	28.1	0.0001	FR3	92.3
SLIYAASSLQSGVPSK	Discovery / AIMS	+	+	0.0122878	0.780952	+	-	0.0495136	0.73379	gi|63103149	82.349	1606.86	2	804.43	16	IGKV1-16*02	33.1	2e-06	CDR2	90.9
SLNTAYLQWSSLK	Discovery / AIMS	+	+	0.00088266	0.642414	+	-	0.0174527	0.490216	gi|46253871	246.31	1509.78	2	755.89	13	IGHV5-51*05	27.7	0.0001	FR3	100
SLSTAYLQWSSLK	Discovery / AIMS	+	+	9.80988e-05	0.812085	+	+	0.00107258	0.863547	gi|4097044	208.27	1482.77	2	742.39	13	IGHV5-51*05	28.9	4e-05	FR3	100
SLTSDDTAVYYCAR	Discovery	+	-	0.00970351	0.604546	n.d.	n.d.	-	-	gi|432139269	186.13	1620.71	2	811.35	14	IGHV1-18*01	30.8	1e-05	FR3	100
SLTTAYLQWSSLK	Discovery	+	+	0.00183181	0.793538	n.d.	n.d.	-	-	gi|815068660	187.74	1496.79	2	749.39	13	IGHV5-51*05	27.7	0.0001	FR3	84.6
SNWPLTFGGGTK	Discovery	+	-	0.0278474	0.535232	n.d.	n.d.	-	-	gi|11275314	128.21	1263.62	2	632.81	12	IGKJ4*01	21.2	0.0002	CDR3	92.3
SPYTFGQGTK	AIMS	n.d.	n.d.	-	-	-	-	0.356434	0.25664	gi|358439861	65.695	1084.52	2	543.259	10	IGKJ2*01	21.9	0.0001	FR4	92.9
STSTAYLQWSSLK	Discovery / AIMS	+	+	0.00438229	0.803855	+	+	0.00364965	0.791465	gi|106897850	179.46	1470.74	2	736.37	13	IGHV5-78*01	28.5	8e-05	FR3	84.6
STYYADSVK	Discovery	+	-	0.0189737	0.657406	n.d.	n.d.	-	-	gi|618855249	70.908	1032.48	2	517.24	9	IGHV3-53*01	22.3	0.014	FR3	100
SVSGSPGQSVTISCTGTSSDVGGYNYVSWYQQHPGK	Discovery	+	-	0.0268941	0.520713	n.d.	n.d.	-	-	gi|21669519	88.531	3776.7	3	1259.9	36	IGLV2-11*03	80.9	5e-24	CDR1	92.3
TDDTALYYCAR	Discovery / AIMS	+	-	0.0410299	0.618621	-	-	0.123854	0.440257	gi|304562521	164.64	1347.58	2	674.79	11	IGHV1-18*01	25.8	0.0008	FR3	100
TFGQGTKLELKR	Discovery / AIMS	+	+	0.00715072	-1.02452	-	-	0.987724	0.00475698	gi|5731229	202.18	1376.78	2	689.39	12	IGKJ2*01	25.4	7e-06	CDR3	100
TFGQGTKVELKR	Discovery / AIMS	+	+	0.00488639	-0.871484	-	-	0.703286	0.0805462	gi|130381795	190.35	1362.76	2	682.38	12	IGKJ1*01	25.4	7e-06	CDR3	81.8
TFGQGTKVEVKR	Discovery	+	-	0.0353972	-0.637223	n.d.	n.d.	-	-	gi|4378282	124.38	1348.75	2	675.37	12	IGKJ1*01	25.8	5e-06	CDR3	90.9
TLSLSPGER	Discovery	+	-	0.0274966	0.391355	n.d.	n.d.	-	-	gi|585379713	91.867	958.508	2	480.25	9	IGKV3-20*02	21.6	0.025	FR1	90.9
TNYNPSLK	Discovery	+	-	0.00645631	0.451295	n.d.	n.d.	-	-	gi|6531442	71.451	935.471	2	468.74	8	IGHV4-34*13	21.6	0.019	FR3	90.9
TPYTFGQGTK	Discovery	+	+	0.00408202	1.08225	n.d.	n.d.	-	-	gi|98956429	143.4	1098.53	2	550.27	10	IGKJ2*01	21.9	0.0001	CDR3	100
TQSPGTLSLSPGER	Discovery / AIMS	+	-	0.0320919	0.435293	-	-	0.222495	0.349722	gi|70798921	184.51	1428.72	2	715.36	14	IGKV3-20*01	32	4e-06	FR1	100
VLESGGGLVQPGGSLR	AIMS	n.d.	n.d.	-	-	-	-	0.892229	-0.0812729	gi|112696672	209.23	1524.83	2	763.413	16	IGHV3-23*01	34.3	6e-07	FR1	100
VSNRDSGVPDRFSGSGSGTDFTLK	Discovery	+	+	0.0191407	-0.91305	n.d.	n.d.	-	-	gi|21669411	119.38	2485.18	2	1243.59	24	IGKV2-30*01	52.4	3e-13	FR3	100
VTSVTAADTAVYYCAR	Discovery / AIMS	+	-	0.0167593	0.540116	+	+	0.00425657	0.769167	gi|219566321	241.42	1746.82	2	874.41	16	IGHV4-34*13	33.1	1e-06	FR3	100
WFDPWGQGTLVTVSSASTK	Discovery / AIMS	+	+	0.000179544	1.02778	+	+	0.00359184	0.994828	gi|304563132	219.99	2066.01	2	1034.01	19	IGHJ5*02	38.5	1e-10	CDR3	87.5
WGQGTLVTVSSASTK	Discovery / AIMS	+	+	0.00156318	0.709271	-	-	0.0718629	0.919798	gi|304562441	216	1520.78	2	761.39	15	IGHJ1*01	26.9	2e-06	FR4	100
YACWYQQK	Discovery	+	+	0.00215833	0.917355	n.d.	n.d.	-	-	gi|651207877	143	1145.5	2	573.75	8	IGLV3-1*01	25	0.001	FR2	100
YAYWYQQK	Discovery	+	+	0.0139897	0.897775	n.d.	n.d.	-	-	gi|757819141	145.04	1148.53	2	575.26	8	IGLV3-25*03	24.3	0.003	FR2	100
YFDLWGR	Discovery / AIMS	+	+	0.00119586	0.957021	+	+	0.00578917	0.923646	gi|304563378	128.57	955.455	2	478.73	7	IGHJ2*01	21.9	8e-05	FR4	100
YLAWYQQK	Discovery	+	-	0.0257671	0.508801	n.d.	n.d.	-	-	gi|75765276	163.34	1098.55	2	550.27	8	IGKV3-20*02	23.1	0.007	FR2	100
YSPSFEGQVTISADK	Discovery / AIMS	+	+	0.00612076	0.663201	-	-	0.118503	0.356603	gi|190341781	161.94	1627.77	2	814.89	15	IGHV5-51*05	32.7	2e-06	FR3	100
YSPSFEGQVTITGDK	AIMS	n.d.	n.d.	-	-	-	-	0.0955976	0.331794	gi|21670685	73.722	1627.77	2	814.886	15	IGHV5-51*05	30	2e-05	FR3	93.3
YSPSFQGQVTISADR	Discovery	+	+	0.00120954	0.762171	n.d.	n.d.	-	-	gi|14268424	101.3	1654.8	2	828.4	15	IGHV5-51*05	32.7	2e-06	FR3	93.3
YSPSFQGQVTLSADK	Discovery / AIMS	+	+	0.000130603	0.62432	+	-	0.0102073	0.490847	gi|304563132	264.85	1626.79	2	814.39	15	IGHV5-51*05	33.1	1e-06	FR3	93.3
YVSWYQQHPGK	Discovery	+	+	0.000750347	0.937502	n.d.	n.d.	-	-	gi|194173457	132.25	1391.66	2	696.83	11	IGLV2-11*03	31.2	6e-06	FR2	100
YYVDSVEGR	Discovery	+	+	0.00150088	0.980528	n.d.	n.d.	-	-	gi|4323177	114.86	1086.5	2	544.25	9	IGHV3-52*01	21.6	0.027	FR3	88.9
YYVDSVK	Discovery	+	-	0.0210699	0.572231	n.d.	n.d.	-	-	gi|209402818	79.451	872.428	2	437.21	7	IGHV3-52*01	18.9	0.21	FR3	100
