# Supplementary material for: Peptides of the variable IgG domain as potential biomarker candidates in primary open-angle glaucoma (POAG)
Source: Oxford University Press journal article supplement (doi:10.1093/hmg/ddx332), 2017-09-19
Supplement: ddx332_supplementary_tables_1-2.pdf [file ddx332_supplementary_tables_1-2.pdf]

**Supplementary Tab. 1:** Results of the densitometric analysis and Fab protein concentration.

| <b>Sample</b> | <b>Area of Fab spots (dpi)</b> | <b>Fab Concentration [<math>\mu\text{g}/\mu\text{l}</math>] - BCA assay</b> |
|---------------|--------------------------------|-----------------------------------------------------------------------------|
| Control 1     | 65472.927                      | 0.33                                                                        |
| Control 2     | 59115.865                      | 0.26                                                                        |
| Control 3     | 45729.404                      | 0.21                                                                        |
| Control 4     | 58185.927                      | 0.85                                                                        |
| Control 5     | 62848.551                      | 0.34                                                                        |
| Control 6     | 53812.187                      | 0.38                                                                        |
| Control 7     | 50649.066                      | 0.28                                                                        |
| Control 8     | 49414.258                      | 0.30                                                                        |
| Control 9     | 60310.986                      | 0.43                                                                        |
| Control 10    | 69813.572                      | 0.24                                                                        |
| Control 11    | 65794.258                      | 0.29                                                                        |
| Control 12    | 66643.238                      | 0.32                                                                        |
| Control 13    | 64208.894                      | 0.34                                                                        |
| Control 14    | 65378.057                      | 0.38                                                                        |
| Control 15    | 50849.768                      | 0.31                                                                        |
| POAG 1        | 60226.108                      | 0.25                                                                        |
| POAG 2        | 60670.016                      | 0.20                                                                        |
| POAG 3        | 60721.773                      | 0.21                                                                        |
| POAG 4        | 47009.137                      | 0.19                                                                        |
| POAG 5        | 50717.702                      | 0.29                                                                        |
| POAG 6        | 52171.430                      | 0.23                                                                        |
| POAG 7        | 50276.128                      | 0.18                                                                        |
| POAG 8        | 52510.844                      | 0.36                                                                        |
| POAG 9        | 39479.936                      | 0.20                                                                        |
| POAG 10       | 63368.108                      | 0.20                                                                        |
| POAG 11       | 66263.551                      | 0.25                                                                        |
| POAG 12       | 54302.794                      | 0.21                                                                        |
| POAG 13       | 57748.501                      | 0.31                                                                        |
| Mean          | 57275                          | 0.29                                                                        |
| S.D.          | 7594                           | 0.13                                                                        |

**Supplementary Tab. 2:** Information about IgG V domain peptide sequences which were differently distributed between POAG and CTRL group in the discovery study.

| No. | CDR / FR | Sequence                                | Protein      | m/z    | Charge | Score  | Length | Germline hit (gene name) | BLAST bit score | Homology (%) | Discovery study (p ≤ 0.05; log2 fold change ≥ 0.5) | p-value | Fold change (POAG vs. CTRL) |
|-----|----------|-----------------------------------------|--------------|--------|--------|--------|--------|--------------------------|-----------------|--------------|----------------------------------------------------|---------|-----------------------------|
| 1   | FR1      | AIQMTQSPSSLSASVGDR                      | gi 662564787 | 917.9  | 2      | 232.37 | 18     | IGKV1-6*01               | 37              | 100          | ✓                                                  | 0.01    | ↓                           |
| 2   | FR3      | ASDTAMYYCAR                             | gi 761232722 | 654.8  | 2      | 145.46 | 11     | IGHV5-10-1*01            | 27.7            | 100          | ✓                                                  | 0.01    | ↓                           |
| 3   | CDR1     | ASQSLSSWLAWYQKPKGKAPK                   | gi 323433041 | 787.7  | 3      | 113.88 | 21     | IGKV1-5*01               | 48.1            | 95.2         | ✓                                                  | 0.01    | ↓                           |
| 4   | CDR1     | ASQSVGSNLAWYQKPGQAPR                    | gi 630869019 | 1137.1 | 2      | 166.67 | 21     | IGKV3-15*01              | 45.4            | 95.2         | ✓                                                  | 0.01    | ↓                           |
| 5   | CDR1     | ASQSVNSNLAWYQKPGQAPR                    | gi 87906     | 1165.6 | 2      | 166.36 | 21     | IGKV3-15*01              | 45.8            | 95.2         | ✓                                                  | 0.01    | ↓                           |
| 6   | CDR1     | ASQSVSNLAWYQKPGQAPR                     | gi 237702286 | 777.7  | 3      | 79.393 | 21     | IGKV3-15*01              | 45.8            | 95.2         | ✓                                                  | 0.01    | ↓                           |
| 7   | CDR1     | ASQSVSSSLAWYQKPGQAPR                    | gi 323432554 | 1138.6 | 2      | 166.67 | 21     | IGKV3-15*01              | 45.1            | 95.2         | ✓                                                  | 0.01    | ↓                           |
| 8   | CDR1     | ASQSVSSSYLAWYQKPGQAPR                   | gi 149673891 | 1220.1 | 2      | 206.45 | 22     | IGKV3-20*02              | 48.9            | 100          | ✓                                                  | 0.01    | ↓                           |
| 9   | CDR1     | ASQSVSSYLAWYQKPKGQAPR                   | gi 339272255 | 873.4  | 2      | 225.09 | 15     | IGKV3-11*01              | 34.3            | 100          | ✓                                                  | 0.01    | ↓                           |
| 10  | CDR1     | ASQSVSSYLAWYQKPGQAPR                    | gi 339272255 | 1176.6 | 2      | 240.34 | 21     | IGKV3-11*01              | 47.4            | 100          | ✓                                                  | 0.01    | ↓                           |
| 11  | FR3      | ASSLEGGVPSR                             | gi 7438723   | 530.3  | 2      | 105.25 | 11     | IGKV1-13*01              | 22.7            | 90.9         | ✓                                                  | 0.01    | ↓                           |
| 12  | FR3      | ASSLEGGVPSR                             | gi 442828    | 545.3  | 2      | 178.71 | 11     | IGKV1-13*01              | 24.3            | 100          | ✓                                                  | 0.01    | ↓                           |
| 13  | FR3      | ATGIPDRFR                               | gi 52630839  | 516.8  | 2      | 108.57 | 9      | IGKV3-20*01              | 21.2            | 100          | ✓                                                  | 0.01    | ↓                           |
| 14  | FR3      | ATGIPDRFSGSGGTDFTLTSLR                  | gi 70797863  | 1172.1 | 2      | 158.99 | 23     | IGKV3-20*01              | 48.9            | 95.7         | ✓                                                  | 0.01    | ↓                           |
| 15  | FR1      | DIQLTQSPSTLSASVGDR                      | gi 27531086  | 938.0  | 2      | 251.74 | 18     | IGKV1-5*01               | 37              | 94.4         | ✓                                                  | 0.01    | ↓                           |
| 16  | FR1      | DIQMTQSPSSVSASVGDR                      | gi 820957471 | 932.9  | 2      | 300.25 | 18     | IGKV1-12*01              | 37.7            | 100          | ✓                                                  | 0.01    | ↓                           |
| 17  | FR1      | DIQMTQSPSTLSASVGDR                      | gi 442828    | 947.0  | 2      | 310.55 | 18     | IGKV1-5*01               | 38.1            | 100          | ✓                                                  | 0.01    | ↓                           |
| 18  | FR1      | DIVLTQSPDSLAVSLGER                      | gi 13096223  | 950.5  | 2      | 248.7  | 18     | IGKV4-1*01               | 36.6            | 94.4         | ✓                                                  | 0.01    | ↓                           |
| 19  | FR1      | DIVMTQSPDSLAVSLGER                      | gi 335892418 | 959.5  | 2      | 295.16 | 18     | IGKV4-1*01               | 37.7            | 100          | ✓                                                  | 0.01    | ↓                           |
| 20  | FR1      | DIVMTQSPSLPVTPEPASPISCR                 | gi 218783338 | 1278.1 | 2      | 221.99 | 24     | IGKV2-28*01              | 52              | 100          | ✓                                                  | 0.02    | ↓                           |
| 21  | FR1      | DLQMTQSPSSLSASVGDR                      | gi 327410291 | 939.9  | 2      | 267.69 | 18     | IGKV1-27*01              | 37              | 94.4         | ✓                                                  | 0.01    | ↓                           |
| 22  | FR1      | DVQLVQSGAEVK                            | gi 821350640 | 636.8  | 2      | 185.2  | 12     | IGHV1-69-2*01            | 24.6            | 91.7         | ✓                                                  | 0.01    | ↓                           |
| 23  | FR1      | ELVLTQSPATLSLSPGER                      | gi 339272255 | 949.5  | 2      | 307.57 | 18     | IGKV3-20*02              | 37              | 94.4         | ✓                                                  | 0.01    | ↓                           |
| 24  | FR1      | ELVLTQSPGTLSLSPGER                      | gi 61970173  | 942.5  | 2      | 327.27 | 18     | IGKV3-20*01              | 37.7            | 94.4         | ✓                                                  | 0.02    | ↓                           |
| 25  | FR1      | ELVMTQSPATLSVSPGER                      | gi 37728242  | 951.5  | 2      | 281.65 | 18     | IGKV3-15*01              | 37.4            | 94.4         | ✓                                                  | 0.01    | ↓                           |
| 26  | FR1      | EVQLVQSGVEVK                            | gi 114147626 | 657.9  | 2      | 236.28 | 12     | IGHV1-69-2*01            | 24.3            | 91.7         | ✓                                                  | 0.01    | ↓                           |
| 27  | CDR3     | FDYWGGTLTVSSASTK                        | gi 304563214 | 974.0  | 2      | 197.84 | 18     | IGHJ4*01                 | 34.3            | 100          | ✓                                                  | 0.01    | ↓                           |
| 28  | FR3      | FSGSGAGTDFTLK                           | gi 323433100 | 644.3  | 2      | 249.98 | 13     | IGKV2-24*01              | 30.4            | 100          | ✓                                                  | 0.01    | ↓                           |
| 29  | FR3      | FSGSGSGTDFTLTSLR                        | gi 80975645  | 822.9  | 2      | 167.18 | 16     | IGKV3-20*02              | 33.1            | 93.8         | ✓                                                  | 0.01    | ↓                           |
| 30  | FR3      | FSGSGSGTDFTLR                           | gi 523391770 | 666.3  | 2      | 158.86 | 13     | IGKV2-28*01              | 29.3            | 92.3         | ✓                                                  | 0.01    | ↓                           |
| 31  | CDR3     | FSGSGSGTDFTLTISLQAEDVAVVY<br>YQQYYSTPPL | gi 15919681  | 1318.3 | 3      | 95.445 | 36     | IGKV4-1*01               | 73.2            | 100          | ✓                                                  | 0.01    | ↓                           |
| 32  | CDR2     | GLEWWMGLVYPGDSIDTR                      | gi 106897261 | 905.4  | 2      | 163.8  | 16     | IGHV5-51*05              | 38.9            | 93.8         | ✓                                                  | 0.01    | ↓                           |

|    |     |           |              |       |   |        |   |             |      |      |   |      |   |
|----|-----|-----------|--------------|-------|---|--------|---|-------------|------|------|---|------|---|
| 33 | FR2 | GLEWVANLK | gi 630868332 | 515.3 | 2 | 177.36 | 9 | IGHV3-7*01  | 22.7 | 88.9 | ✓ | 0.01 | ↓ |
| 34 | FR2 | GLEWVGR   | gi 158259769 | 408.7 | 2 | 158.38 | 7 | IGHV3-72*02 | 20.4 | 100  | ✓ | 0.01 | ↓ |

| No. | CDR / FR | Sequence            | Protein      | m/z   | Charge | Score  | Length | Germline hit (gene name) | BLAST bit score | Homology (%) | Discovery study (p ≤ 0.05; log2 fold change ≥ 0.5) | p-value | Fold change (POAG vs. CTRL) |
|-----|----------|---------------------|--------------|-------|--------|--------|--------|--------------------------|-----------------|--------------|----------------------------------------------------|---------|-----------------------------|
| 35  | FR2      | GLEWVSSISR          | gi 63022996  | 567.3 | 2      | 164.64 | 10     | IGHV3-38-3*01            | 22.3            | 100          | ✓                                                  | 0.01    | ↓                           |
| 36  | CDR2     | GLEWVSSISR          | gi 662565320 | 610.8 | 2      | 120.57 | 11     | IGHV3-69-1*01            | 23.9            | 100          | ✓                                                  | 0.01    | ↓                           |
| 37  | FR4      | GTLTVSSASTK         | gi 34532520  | 575.8 | 2      | 173.72 | 12     | IGHJ1*01                 | 18.5            | 100          | ✓                                                  | 0.01    | ↓                           |
| 38  | CDR2     | INSDGSSSYADSVK      | gi 158714463 | 765.8 | 2      | 91.592 | 15     | IGHV3-74*01              | 32.7            | 100          | ✓                                                  | 0.02    | ↓                           |
| 39  | FR2      | LAWYQQK             | gi 160286048 | 468.7 | 2      | 143.97 | 7      | IGKV3-20*02              | 20.4            | 100          | ✓                                                  | 0.01    | ↓                           |
| 40  | CDR2     | LLIYEVSK            | gi 882264    | 482.8 | 2      | 95.358 | 8      | IGLV2-8*03               | 18.1            | 87.5         | ✓                                                  | 0.01    | ↓                           |
| 41  | CDR2     | LLIYSNNQRPSGVPDR    | gi 62205367  | 915.0 | 2      | 103.14 | 16     | IGLV1-44*01              | 37              | 100          | ✓                                                  | 0.01    | ↓                           |
| 42  | CDR2     | LLLYWASTR           | gi 323432988 | 561.8 | 2      | 233.57 | 9      | IGKV4-1*01               | 22.3            | 88.9         | ✓                                                  | 0.01    | ↓                           |
| 43  | FR1      | LVESGGGLVKPGGSLR    | gi 323433102 | 763.4 | 2      | 148.7  | 16     | IGHV3-69-1*01            | 35.4            | 100          | ✓                                                  | 0.01    | ↓                           |
| 44  | FR2      | NDLGWYQQK           | gi 152149150 | 576.3 | 2      | 122.94 | 9      | IGKV1-17*01              | 25.8            | 100          | ✓                                                  | 0.01    | ↓                           |
| 45  | FR2      | NDLGWYQQKPGK        | gi 152149150 | 717.4 | 2      | 193.62 | 12     | IGKV1-17*01              | 32.7            | 100          | ✓                                                  | 0.01    | ↓                           |
| 46  | FR3      | NEDTAIYYCAR         | gi 8699279   | 688.3 | 2      | 90.05  | 11     | IGHV1-69*06              | 26.2            | 81.8         | ✓                                                  | 0.02    | ↑                           |
| 47  | CDR1     | NGYLAWYQQK          | gi 695942258 | 635.8 | 2      | 158.76 | 10     | IGKV3-20*02              | 23.5            | 80           | ✓                                                  | 0.01    | ↑                           |
| 48  | FR1      | NIQMTQSPSSLSASVGDGR | gi 444737639 | 939.5 | 2      | 192.22 | 18     | IGKV1-33*01              | 35.8            | 94.4         | ✓                                                  | 0.01    | ↓                           |
| 49  | FR3      | NQFSLK              | gi 284521128 | 368.7 | 2      | 132.72 | 6      | IGHV4-39*04              | 16.2            | 100          | ✓                                                  | 0.01    | ↓                           |
| 50  | FR3      | NSLYLQMNSLR         | gi 209402818 | 669.8 | 2      | 303.71 | 11     | IGHV3-13*01              | 25.4            | 100          | ✓                                                  | 0.01    | ↓                           |
| 51  | FR3      | NTRYLQMN            | gi 630868188 | 996.5 | 1      | 172.15 | 8      | IGHV3-38*01              | 20.8            | 100          | ✓                                                  | 0.01    | ↓                           |
| 52  | FR2      | QAPGKGLEWVGR        | gi 158259769 | 649.4 | 2      | 89.189 | 12     | IGHV3-72*02              | 30.8            | 100          | ✓                                                  | 0.01    | ↑                           |
| 53  | FR1      | QSPGTLSPGER         | gi 70797863  | 664.8 | 2      | 98.942 | 13     | IGKV3-20*01              | 30              | 100          | ✓                                                  | 0.01    | ↓                           |
| 54  | FR1      | QVELVESGGGLVK       | gi 371446908 | 657.9 | 2      | 255.08 | 13     | IGHV3-11*01              | 27.3            | 92.3         | ✓                                                  | 0.01    | ↓                           |
| 55  | FR1      | QVELVQSGAEVK        | gi 407943831 | 643.8 | 2      | 314.35 | 12     | IGHV1-69*03              | 24.6            | 91.7         | ✓                                                  | 0.01    | ↓                           |
| 56  | FR3      | SDDTAVVYCARGYR      | gi 815095215 | 848.9 | 2      | 120.55 | 14     | IGHV1-18*01              | 28.1            | 100          | ✓                                                  | 0.01    | ↓                           |
| 57  | CDR2     | SLIYAASSLQSGVPSK    | gi 63103149  | 804.4 | 2      | 82.349 | 16     | IGKV1-16*02              | 33.1            | 100          | ✓                                                  | 0.01    | ↓                           |
| 58  | FR3      | SLNTAYLQWSSLK       | gi 46253871  | 755.9 | 2      | 218.11 | 13     | IGHV5-51*05              | 27.7            | 84.6         | ✓                                                  | 0.01    | ↓                           |
| 59  | FR3      | SLSTAYLQWSSLK       | gi 4097044   | 742.4 | 2      | 186.51 | 13     | IGHV5-51*05              | 28.9            | 92.3         | ✓                                                  | 0.01    | ↓                           |
| 60  | FR3      | SLTTAYLQWSSLK       | gi 815068660 | 749.4 | 2      | 187.74 | 13     | IGHV5-51*05              | 27.7            | 84.6         | ✓                                                  | 0.01    | ↓                           |
| 61  | FR3      | STSTAYLQWSSLK       | gi 106897850 | 736.4 | 2      | 172.57 | 13     | IGHV5-78*01              | 28.5            | 92.3         | ✓                                                  | 0.01    | ↓                           |
| 62  | CDR3     | TFGQGTKLELKR        | gi 5731229   | 689.4 | 2      | 190.78 | 12     | IGKJ2*01                 | 25.4            | 90.9         | ✓                                                  | 0.01    | ↑                           |
| 63  | CDR3     | TFGQGTKVELKR        | gi 130381795 | 682.4 | 2      | 190.35 | 12     | IGKJ1*01                 | 25.4            | 90.9         | ✓                                                  | 0.01    | ↑                           |
| 64  | CDR3     | TPYTFGQGTK          | gi 98956429  | 550.3 | 2      | 143.4  | 10     | IGKJ2*01                 | 21.9            | 100          | ✓                                                  | 0.01    | ↓                           |

|    |      |                         |              |        |   |        |    |             |      |     |   |      |   |
|----|------|-------------------------|--------------|--------|---|--------|----|-------------|------|-----|---|------|---|
| 65 | FR3  | VSNRDSGVDPDRFSGSGSDFTLK | gi 21669411  | 1243.6 | 2 | 119.38 | 24 | IGKV2-30*01 | 52.4 | 100 | ✓ | 0.02 | ↑ |
| 66 | CDR3 | WFDPWGGQTLTVSSASTK      | gi 304563132 | 1034.0 | 2 | 219.99 | 19 | IGHJ5*02    | 38.5 | 100 | ✓ | 0.01 | ↓ |
| 67 | FR4  | WGQGTLLTVSSASTK         | gi 304562441 | 761.4  | 2 | 195.5  | 15 | IGHJ1*01    | 26.9 | 100 | ✓ | 0.01 | ↓ |
| 68 | FR2  | YACWYQQK                | gi 651207877 | 573.8  | 2 | 143    | 8  | IGLV3-1*01  | 25   | 100 | ✓ | 0.01 | ↓ |

| No. | CDR / FR | Sequence        | Protein      | m/z   | Charge | Score  | Length | Germline hit (gene name) | BLAST bit score | Homology (%) | Discovery study (p ≤ 0.05; log2 fold change ≥ 0.5) | p-value | Fold change (POAG vs. CTRL) |
|-----|----------|-----------------|--------------|-------|--------|--------|--------|--------------------------|-----------------|--------------|----------------------------------------------------|---------|-----------------------------|
| 69  | FR2      | YAYWYQQK        | gi 757819141 | 575.3 | 2      | 145.04 | 8      | IGLV3-25*03              | 24.3            | 100          | ✓                                                  | 0.01    | ↓                           |
| 70  | FR4      | YFDLWGR         | gi 304563378 | 478.7 | 2      | 104.45 | 7      | IGHJ2*01                 | 21.9            | 100          | ✓                                                  | 0.01    | ↓                           |
| 71  | FR3      | YSPFEGQVTISADK  | gi 190341781 | 814.9 | 2      | 161.94 | 15     | IGHV5-51*05              | 32.7            | 93.3         | ✓                                                  | 0.01    | ↓                           |
| 72  | FR3      | YSPFQGQVTISADR  | gi 14268424  | 828.4 | 2      | 101.3  | 15     | IGHV5-51*05              | 32.7            | 93.3         | ✓                                                  | 0.01    | ↓                           |
| 73  | FR3      | YSPFQGQVTLASADK | gi 304563132 | 814.4 | 2      | 264.85 | 15     | IGHV5-51*05              | 33.1            | 93.3         | ✓                                                  | 0.01    | ↓                           |
| 74  | FR2      | YVSWYQQHPGK     | gi 194173457 | 696.8 | 2      | 132.25 | 11     | IGLV2-11*03              | 31.2            | 100          | ✓                                                  | 0.01    | ↓                           |
| 75  | FR3      | YVDSVEGR        | gi 4323177   | 544.3 | 2      | 114.86 | 9      | IGHV3-52*01              | 21.6            | 88.9         | ✓                                                  | 0.02    | ↓                           |

CDR: complementarity determining region (CDR1, CDR2 and CDR3)      FR: framework region (FR1, FR2, FR3 and FR4)

✓ : Peptide sequence fulfilled criteria    - : Peptide sequence failed to fulfill criteria    ↓ : Low abundant    ↑ : High abundant
